# Supplementary material for: Stability of bicyclic guanidine superbases and their salts in water
Source: Royal Society of Chemistry journal article supplement (doi:10.1039/d4ra08751h), 2025-01-01
Supplement: d4ra08751h1.pdf [file d4ra08751h1.pdf]

# Supporting information

## Stability of Bicyclic Guanidine Superbases and Their Salts in Water

Eva Gazagnaire<sup>a</sup>, Jussi Helminen<sup>a</sup>, Thomas Golin Almeida<sup>b</sup>, Petri Heinonen<sup>a</sup>, Markus Metsälä<sup>a</sup>, Theo Kurten<sup>b</sup>  
and Ilkka Kilpeläinen<sup>\*a</sup>

<sup>a</sup> Department of Chemistry, Faculty of Science, University of Helsinki, FI-00560 Helsinki, Finland

<sup>b</sup> Institute for Atmospheric and Earth System Research/Chemistry, Faculty of Science, FI-00560 Helsinki, Finland

## 1. Table of Contents

|                                                              |     |
|--------------------------------------------------------------|-----|
| General information .....                                    | 5   |
| a. General procedure for the synthesis of ionic liquid ..... | 5   |
| b. General procedure of SB/SB-IL hydrolysis .....            | 5   |
| I. Absolute integrals and hydrolysis calculations .....      | 5   |
| 1. mTBD .....                                                | 5   |
| a. mTBD + water over 48h .....                               | 5   |
| b. mTBD + water at 70°C over 12 days .....                   | 10  |
| c. mTBD + water at 90°C over 12 days ii .....                | 13  |
| d. mTBD + water + DMSO .....                                 | 16  |
| e. mTBD + water + ethylene glycol .....                      | 20  |
| f. mTBD + water + phenol .....                               | 24  |
| g. mTBD + water + propanol .....                             | 28  |
| 2. [mTBDH][OAc] .....                                        | 32  |
| a. [mTBDH][OAc] + water .....                                | 32  |
| b. [mTBDH][OAc] + water + DMSO .....                         | 37  |
| c. [mTBDH][OAc] + water + ethylene glycol .....              | 41  |
| d. [mTBDH][OAc] + water + phenol .....                       | 45  |
| e. [mTBDH][OAc] + water + propanol .....                     | 49  |
| f. [mTBDH][ClOAc] + water .....                              | 53  |
| g. [mTBDH][Cl2OAc] + water .....                             | 58  |
| h. [mTBDH][Cl3OAc] + water .....                             | 63  |
| 3. mTBN .....                                                | 68  |
| a. mTBN + water over 48h at 90°C. ....                       | 68  |
| b. mTBN + water over 12 days at 70°C. ....                   | 73  |
| c. mTBN + water over 12 days at 90°C. ....                   | 76  |
| 4. [mTBNH][OAc] + water .....                                | 79  |
| a. [mTBNH][OAc] + water over 48h at 90°C. ....               | 79  |
| b. [mTBNH][OAc] + water at 90°C over 12 days. ....           | 84  |
| c. [mTBNH][OAc] + water at 70°C over 12 days. ....           | 87  |
| d. [mTBNH][ClOAc] + water .....                              | 90  |
| e. [mTBNH][Cl2OAc] + water .....                             | 95  |
| f. [mTBNH][Cl3OAc] + water .....                             | 100 |
| 5. mTBO + water .....                                        | 105 |
| 6. dm39-mTBD + water .....                                   | 110 |
| 7. [dm39-mTBDH][OAc] + water .....                           | 112 |

|      |                                                                                    |     |
|------|------------------------------------------------------------------------------------|-----|
| 8.   | dm3-m0-mTBD + water .....                                                          | 115 |
| 9.   | [dm3-m0-mTBDH][OAc] + water .....                                                  | 118 |
| 10.  | dm3-mTBD + water.....                                                              | 121 |
| 11.  | [dm3-mTBDH][OAc] + water.....                                                      | 126 |
| 12.  | m2-mTBD + water.....                                                               | 131 |
| 13.  | [m2-mTBDH][OAc] + water.....                                                       | 134 |
| II.  | Half-time calculation .....                                                        | 137 |
| 1.   | SB and their salts with pure water at 90°C.....                                    | 137 |
| 2.   | Superbase and their acetate salt in presence of water and co-solvent at 90°C ..... | 139 |
| 3.   | SB and their acetate salts over a three days period at different temperature ..... | 140 |
| III. | Curves of hydrolysis.....                                                          | 141 |
| 1.   | mTBD with different amounts of water .....                                         | 141 |
| 2.   | mTBD with different amounts of DMSO .....                                          | 141 |
| 3.   | mTBD with different amounts of Ethylene Glycol.....                                | 142 |
| 4.   | mTBD with different amounts of Phenol.....                                         | 143 |
| 5.   | mTBD with different amounts of Propanol .....                                      | 143 |
| 6.   | mTBN with different amounts of water .....                                         | 144 |
| 7.   | dm39-mTBD with different amounts of water.....                                     | 144 |
| 8.   | dm3-m0-mTBD with different amounts of water .....                                  | 145 |
| 9.   | dm3-mTBD with different amounts of water.....                                      | 145 |
| 10.  | m2-mTBD with different amounts of water.....                                       | 146 |
| 11.  | [mTBDH][OAc] with different amounts of water .....                                 | 146 |
| 12.  | [mTBDH][OAc] with different amounts of DMSO .....                                  | 147 |
| 13.  | [mTBDH][OAc] with different amounts of Ethylene Glycol.....                        | 147 |
| 14.  | [mTBDH][OAc] with different amounts of Phenol.....                                 | 148 |
| 15.  | [mTBDH][OAc] with different amounts of Propanol .....                              | 148 |
| 16.  | [mTBNH][OAc] with different amounts of water .....                                 | 148 |
| 17.  | [dm39-mTBDH][OAc] with different amount of water .....                             | 149 |
| 18.  | [dm3-m0-mTBDH][OAc] with different amount of water .....                           | 149 |
| 19.  | [dm3-mTBDH][OAc] with different amount of water .....                              | 150 |
| 20.  | [m2-mTBDH][OAc] with different amount of water .....                               | 150 |
| IV.  | Conductivity.....                                                                  | 151 |
| 1.   | General procedure: .....                                                           | 151 |
| 2.   | Curves and raw data.....                                                           | 151 |
| a.   | Water titration of mTBD.....                                                       | 151 |
| b.   | water titration of mTBN .....                                                      | 154 |

|       |                                                      |     |
|-------|------------------------------------------------------|-----|
| c.    | Water titration of dm3-mTBD .....                    | 156 |
| d.    | Water titration of mTBO.....                         | 158 |
| V.    | PH measurements .....                                | 161 |
| a.    | KOH or mTBD in pure distilled water .....            | 161 |
| b.    | KOH or mTBD in distilled water with acetic acid..... | 162 |
| c.    | pH of KOAc and [mTBDH][OAc] solutions .....          | 163 |
| VI.   | InfraRed measurements .....                          | 163 |
| 1.    | FTIR measurements of water titration .....           | 163 |
| a.    | mTBD .....                                           | 163 |
| b.    | mTBN .....                                           | 166 |
| c.    | dm3-mTBD.....                                        | 168 |
| d.    | mTBO .....                                           | 170 |
| VII.  | Prediction of reaction free energy barriers.....     | 172 |
| VIII. | References:.....                                     | 175 |



## General information

All the used superbase ionic liquids were prepared in our research group by following the procedure published by Gazagnaire et al.<sup>1</sup> Liquid state <sup>1</sup>H were recorded at 27°C using a Bruker Avance Neo 600 [599.69 MHz]. <sup>1</sup>H and spectra were referenced to the residual solvent signals of DMSO-*d*<sub>6</sub> 2.50.

### a. General procedure for the synthesis of ionic liquid

In a 20ml vial 1 molar equivalent of superbase is mixed with 1 molar equivalent of acid and stirred for an hour. The color of the ionic liquid varies from colorless to dark orange and the melting point varies from room temperature to 60°C.

For the acetate salt the addition of the acetic acid to the superbase must be slow due to exothermicity. In the contrary, for strong acid (e.g., chloroacetic acid, dichloroacetic acid, etc.) the addition of the acid can be fast, and the reaction mixture heated to 60°C, otherwise the acid (solid at room temperature) doesn't dissolve into the superbase.

Acetate salt liquid at room temperature: [mTBNH][OAc], [mTBOH][OAc], [dm3-m0-mTBDH][OAc], [dm3-mTBDH][OAc], [m2-mTBDH][OAc]

Acetate salt solid at room temperature: [dm39-mTBDH][OAc]

Strong acid salt liquid at room temperature: [mTBNH][ClOAc], [mTBNH][Cl<sub>2</sub>], [mTBDH][ClOAc]

Strong acid salt solid at room temperature: [mTBNH][Cl<sub>3</sub>OAc], [mTBDH][Cl<sub>2</sub>], [mTBDH][Cl<sub>3</sub>OAc]

### b. General procedure of SB/SB-IL hydrolysis

In an 8ml vial 1g of SB-IL is mixed at room temperature with a defined molar equivalent of water (0.2, 0.5, 1, 5 or 10) just before the start of the kinetic studies. Then the vial is placed into an oven at 90°C. Then every hour, an NMR sample is taken from the vial and analyzed by NMR. For each analysis, the NMR tube was filled with 0.025g of sample and 0.5g of DMSO *d*<sub>6</sub> was added to allow NMR spectrometer locking and shimming. The amount of hydrolysed product was calculated according to the published formula by Sturm et. al (reference 2 in the main article). The Integration calculation was done with MesReNova software, using the Sum method, algorithm: signal picking. For the hydrolysis experiment containing a co-solvent ('entertainer', such as DMSO, phenol, ethylene glycol, etc.) the molar equivalent added is always calculated according to the amount of SB-IL or SB.

## I. Absolute integrals and hydrolysis calculations

### 1. mTBD

#### a. *mTBD + water over 48h*

| Structure                                                                           | Time | Integral N-Methyl | Integral hydrolyzed product 1 | Integral hydrolyzed product 2 | total hydrolysis (mol %) |
|-------------------------------------------------------------------------------------|------|-------------------|-------------------------------|-------------------------------|--------------------------|
| 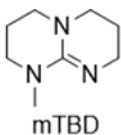 | REF  | 61581200          | 0.00                          | 0.00                          | 0.00                     |
|                                                                                     | 1h   | 457596000         | 4510630                       | 2641810                       | 1.5                      |
|                                                                                     | 2h   | 489849000         | 12322700                      | 4076470                       | 3.2                      |
|                                                                                     | 3h   | 398653000         | 12694200                      | 3332960                       | 3.9                      |
|                                                                                     | 4h   | 426732000         | 19799200                      | 3880470                       | 5.3                      |
|                                                                                     | 5h   | 476445000         | 29529400                      | 6312800                       | 7.0                      |
|                                                                                     | 6h   | 414737000         | 29058400                      | 7200930                       | 8.0                      |
|                                                                                     | 7h   | 461302000         | 34095800                      | 7570780                       | 8.3                      |

|  |     |           |          |          |      |
|--|-----|-----------|----------|----------|------|
|  | 8h  | 450756000 | 41473500 | 8886220  | 10.0 |
|  | 24h | 320014000 | 56818900 | 9535340  | 17.2 |
|  | 48h | 347093000 | 78557400 | 13356700 | 20.9 |

Table S1 1 molar equivalent of mTBD, 0.2 molar equivalent of water.

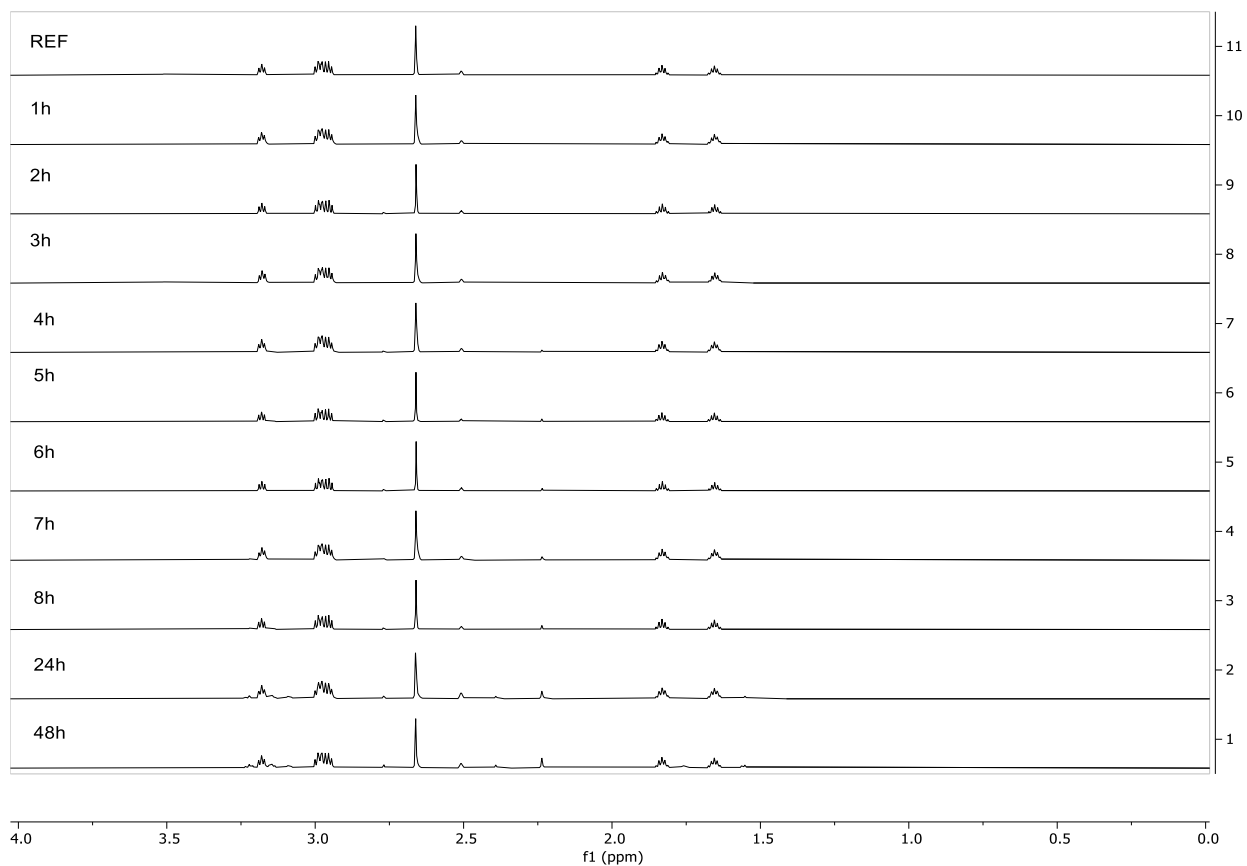

Figure S1 <sup>1</sup>H NMR of 1 molar equivalent of mTBD, 0.2 molar equivalent of water.

| Structure                                                                                   | Time | Integral N-Methyl | Integral HP1 | Integral HP2 | % HP |
|---------------------------------------------------------------------------------------------|------|-------------------|--------------|--------------|------|
| 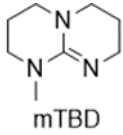<br>mTBD | REF  | 55505900          | 0            | 0            | 0.0  |
|                                                                                             | 1h   | 432726000         | 24281900     | 5402710      | 6.4  |
|                                                                                             | 2h   | 382962000         | 44287800     | 9591770      | 12.3 |
|                                                                                             | 3h   | 353905000         | 57975800     | 12797500     | 16.7 |
|                                                                                             | 4h   | 360509000         | 76657100     | 16114500     | 20.5 |
|                                                                                             | 5h   | 321356000         | 79733500     | 18498400     | 23.4 |
|                                                                                             | 6h   | 316410000         | 84717800     | 19811800     | 24.8 |
|                                                                                             | 7h   | 248739000         | 77712600     | 12070500     | 26.5 |
|                                                                                             | 8h   | 297765000         | 93827300     | 21977800     | 28.0 |
|                                                                                             | 24h  | 224439000         | 140952000    | 31318800     | 43.4 |
|                                                                                             | 48h  | 209958000         | 175707000    | 40719100     | 50.8 |

Table S2 1 molar equivalent of mTBD, 0.5 molar equivalent of water.

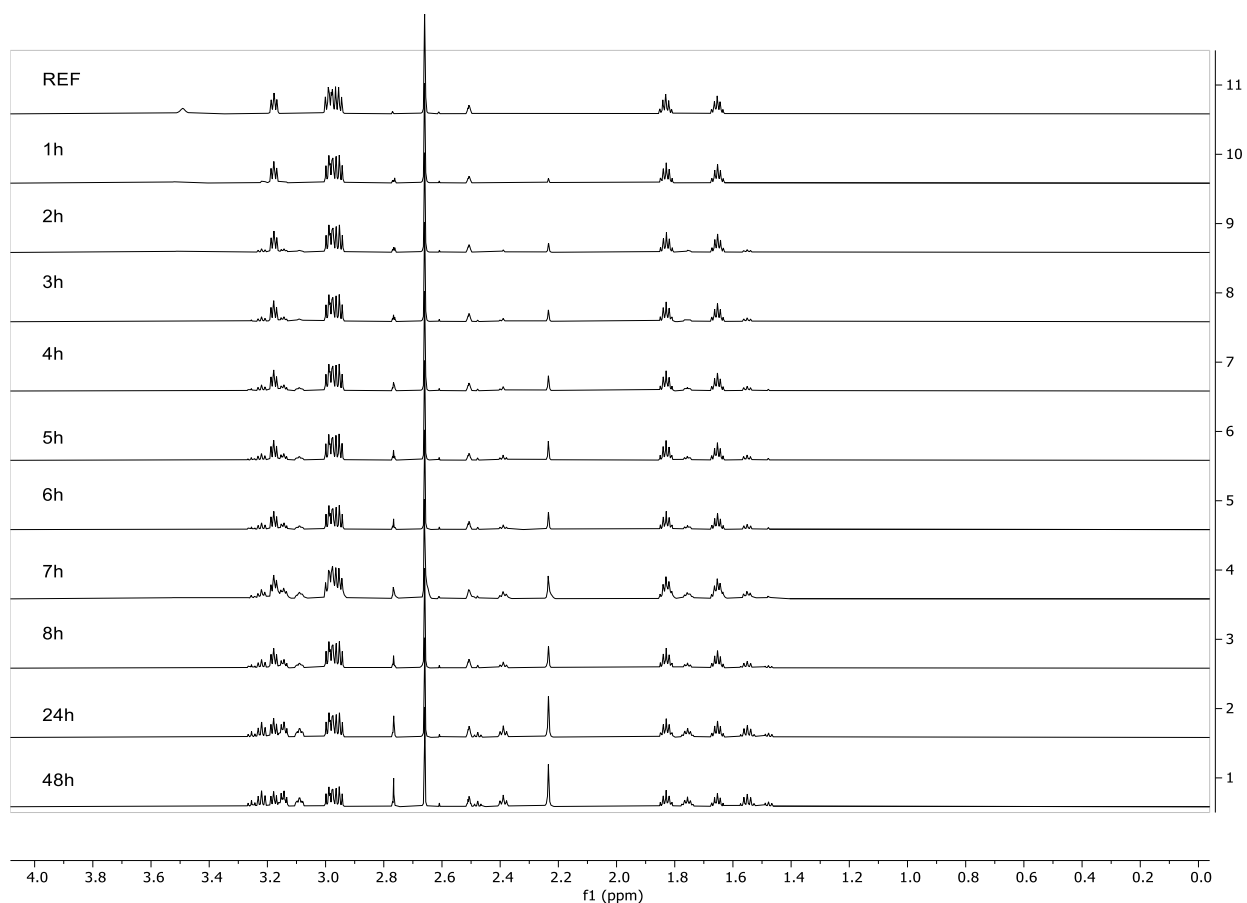

Figure S2  $^1\text{H}$  NMR of 1 molar equivalent of mTBD, 0.5 molar equivalent of water.

| Structure                                                                                   | Time | Integral N-Methyl | Integral HP1 | Integral HP2 | % HP |
|---------------------------------------------------------------------------------------------|------|-------------------|--------------|--------------|------|
| 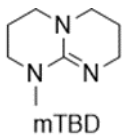<br>mTBD | REF  | 488012000.00      | 0.00         | 0.00         | 0.0  |
|                                                                                             | 1h   | 339497000.00      | 60526600.00  | 13630500.00  | 17.9 |
|                                                                                             | 2h   | 281363000.00      | 87612200.00  | 22069500.00  | 28.0 |
|                                                                                             | 3h   | 275186000.00      | 115816000.00 | 31145400.00  | 34.8 |
|                                                                                             | 4h   | 249984000.00      | 130420000.00 | 35548600.00  | 39.9 |
|                                                                                             | 5h   | 243647000.00      | 145682000.00 | 39494800.00  | 43.2 |
|                                                                                             | 6h   | 237275000.00      | 155514000.00 | 40574100.00  | 45.2 |
|                                                                                             | 7h   | 203880000.00      | 150965000.00 | 31341800.00  | 47.2 |
|                                                                                             | 8h   | 215027000.00      | 169739000.00 | 43800000.00  | 49.8 |
|                                                                                             | 24h  | 154476000.00      | 207946000.00 | 55822100.00  | 63.1 |
|                                                                                             | 48h  | 155054000.00      | 231181000.00 | 61705600.00  | 65.4 |

Table S3 1 molar equivalent of mTBD, 1 molar equivalent of water.

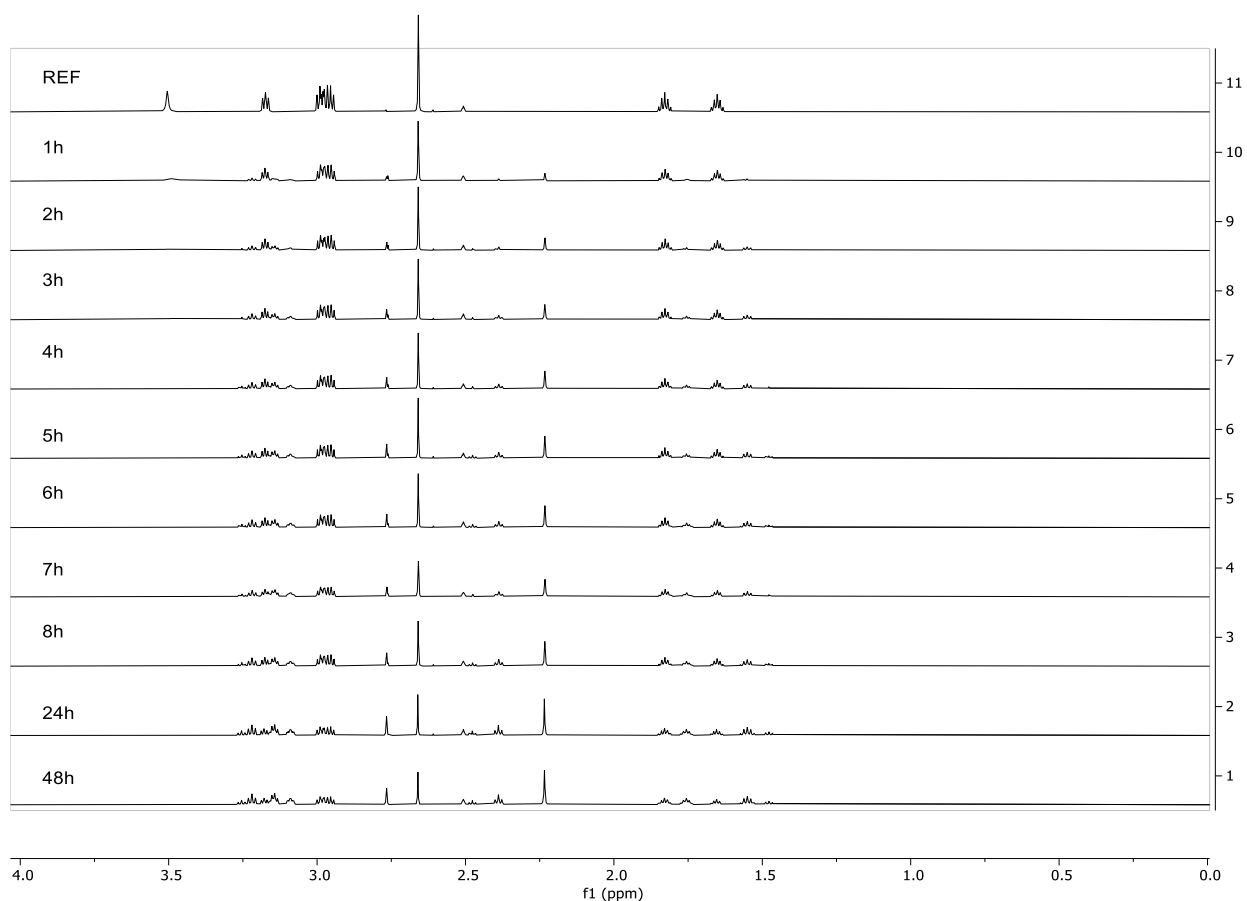

Figure S3 <sup>1</sup>H NMR 1 molar equivalent of mTBD, 1 molar equivalent of water.

| Structure | Time | Integral N-Methyl | Integral HP1 | Integral HP2 | % HP |
|-----------|------|-------------------|--------------|--------------|------|
| <br>mTBD  | REF  | 319508000.00      | 12907100.00  | 486676.00    | 4.0  |
|           | 1h   | 1784990.00        | 286694000.00 | 33128300.00  | 99.4 |
|           | 2h   | 1904400.00        | 292968000.00 | 34981200.00  | 99.4 |
|           | 3h   | 1468770.00        | 303739000.00 | 38314700.00  | 99.6 |
|           | 4h   | 922116.00         | 293973000.00 | 38033800.00  | 99.7 |
|           | 5h   | 802720.00         | 280725000.00 | 36908200.00  | 99.7 |
|           | 6h   | 719068.00         | 282919000.00 | 36688300.00  | 99.8 |
|           | 7h   | 635588.00         | 282686000.00 | 36223300.00  | 99.8 |
|           | 8h   | 721727.00         | 311021000.00 | 39786100.00  | 99.8 |
|           | 24h  | 470263.00         | 282201000.00 | 36416700.00  | 99.9 |
|           | 48h  | 307018.00         | 284222000.00 | 34331200.00  | 99.9 |

Table S4 1 molar equivalent of mTBD, 5 molar equivalents of water.

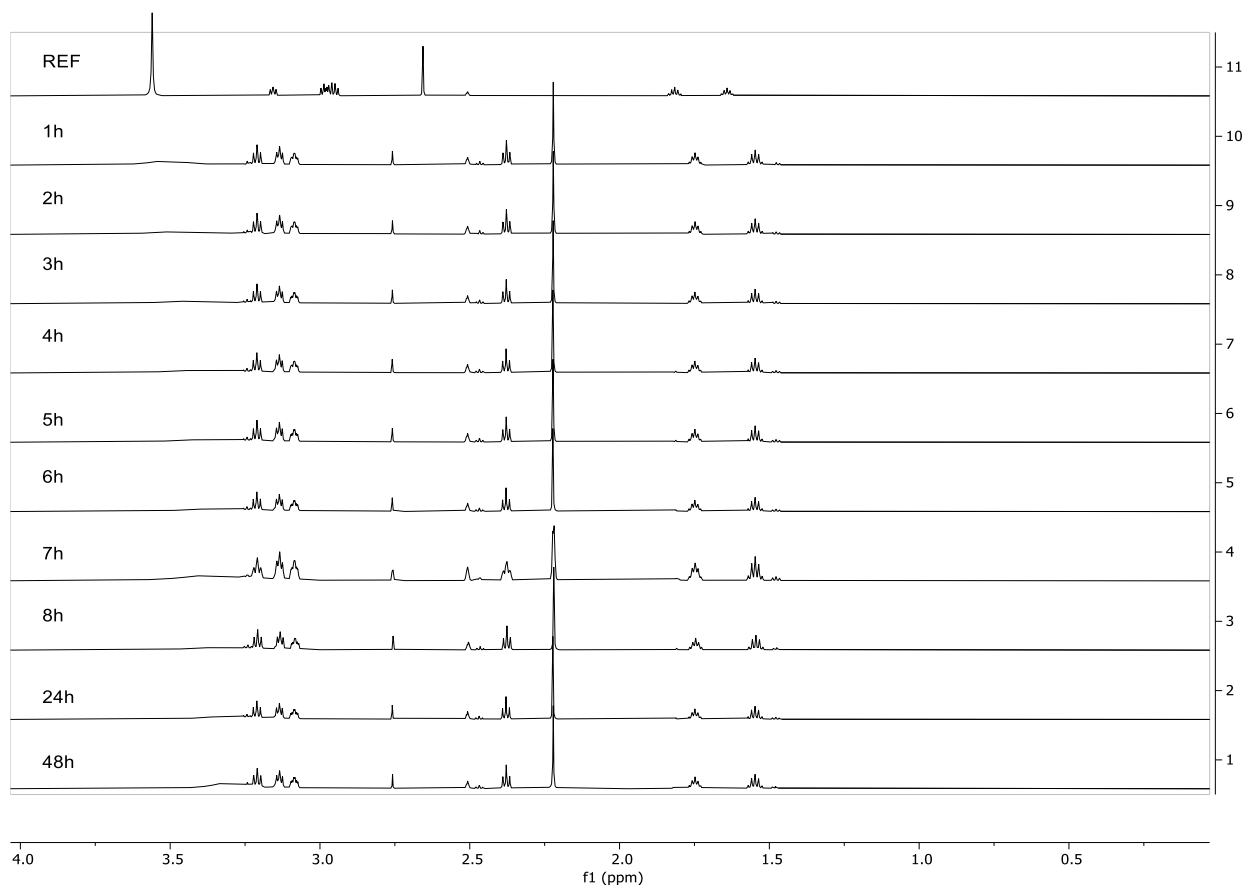

Figure S4 <sup>1</sup>H NMR 1 molar equivalent of mTBD, 5 molar equivalents of water.

| Structure                                                                                   | Time | Integral N-Methyl | Integral HP1 | Integral HP2 | % HP |
|---------------------------------------------------------------------------------------------|------|-------------------|--------------|--------------|------|
| 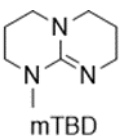<br>mTBD | REF  | 185453000.00      | 8978320.00   | 1039620.00   | 5.1  |
|                                                                                             | 1h   | 1041550.00        | 164633000.00 | 15298100.00  | 99.4 |
|                                                                                             | 2h   | 589013.00         | 193732000.00 | 20095100.00  | 99.7 |
|                                                                                             | 3h   | 357591.00         | 202954000.00 | 21903500.00  | 99.8 |
|                                                                                             | 4h   | 243435.00         | 203951000.00 | 22190000.00  | 99.9 |
|                                                                                             | 5h   | 184426.00         | 210316000.00 | 22924900.00  | 99.9 |
|                                                                                             | 6h   | 211775.00         | 198142000.00 | 19663200.00  | 99.9 |
|                                                                                             | 7h   | 175614.00         | 175746000.00 | 16558400.00  | 99.9 |
|                                                                                             | 8h   | 155521.00         | 202636000.00 | 21424400.00  | 99.9 |
|                                                                                             | 24h  | 415807.00         | 318701000.00 | 31550900.00  | 99.9 |
|                                                                                             | 48h  | 348365.00         | 326064000.00 | 31225400.00  | 99.9 |

Table S5 1 molar equivalent of mTBD, 10 molar equivalents of water.

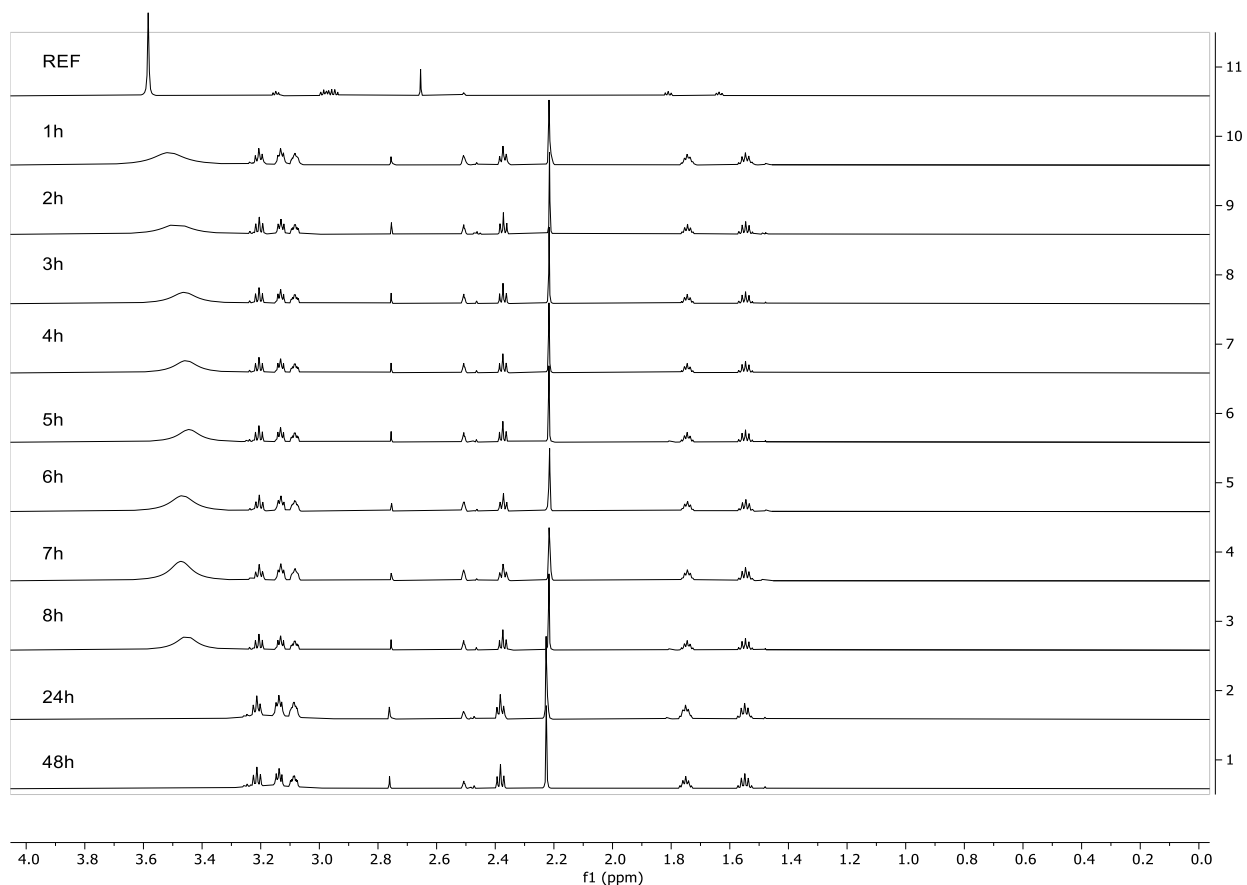

Figure S5  $^1\text{H}$  NMR 1 molar equivalent of mTBD, 10 molar equivalents of water.

b. mTBD + water at  $70^\circ\text{C}$  over 12 days

| Structure                                                                                   | Time    | Integral N-Methyl | Integral HP1 | Integral HP2 | % HP |
|---------------------------------------------------------------------------------------------|---------|-------------------|--------------|--------------|------|
| 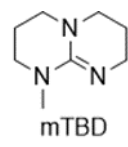<br>mTBD | 3 days  | 25412900.00       | 51286900.00  | 23882800.00  | 74.7 |
|                                                                                             | 6 days  | 13696500.00       | 53197700.00  | 23546900.00  | 84.9 |
|                                                                                             | 9 days  | 9231670.00        | 50629300.00  | 22330900.00  | 88.8 |
|                                                                                             | 12 days | 7484990.00        | 51172800.00  | 22413700.00  | 90.8 |

Table S6 1 molar equivalent of mTBD, 1 molar equivalent of water.

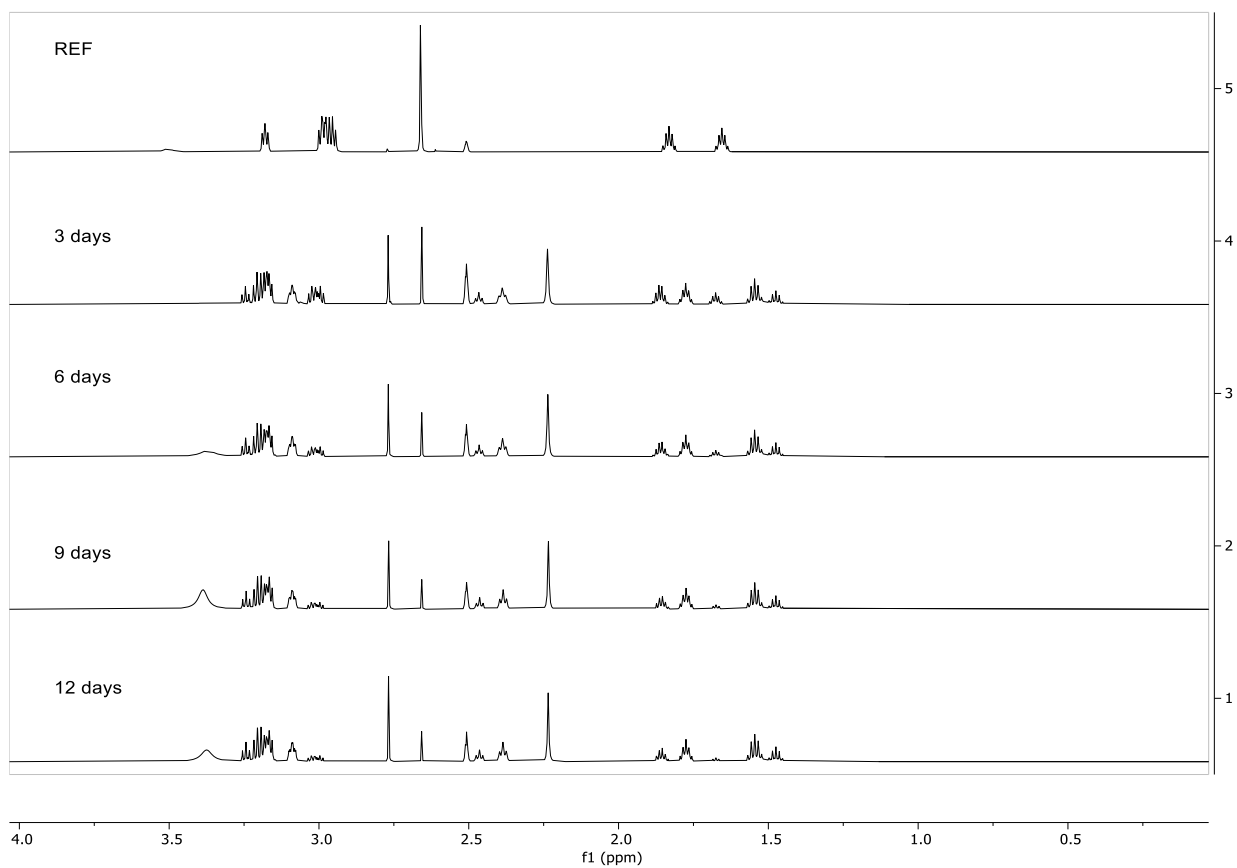

Figure S6  $^1\text{H}$  NMR 1 molar equivalent of mTBD, 1 molar equivalent of water.

| Structure                                                                                   | Time    | Integral N-Methyl | Integral HP1 | Integral HP2 | % HP |
|---------------------------------------------------------------------------------------------|---------|-------------------|--------------|--------------|------|
| 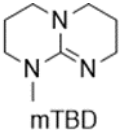<br>mTBD | 3 days  | 1607800.00        | 66834000.00  | 10215700.00  | 98.0 |
|                                                                                             | 6 days  | 1253720.00        | 56638900.00  | 8501620.00   | 98.1 |
|                                                                                             | 9 days  | 1250030.00        | 60028500.00  | 9134640.00   | 98.2 |
|                                                                                             | 12 days | 1090490.00        | 55367300.00  | 8371800.00   | 98.3 |

Table S7 1 molar equivalent of mTBD, 5 molar equivalents of water.

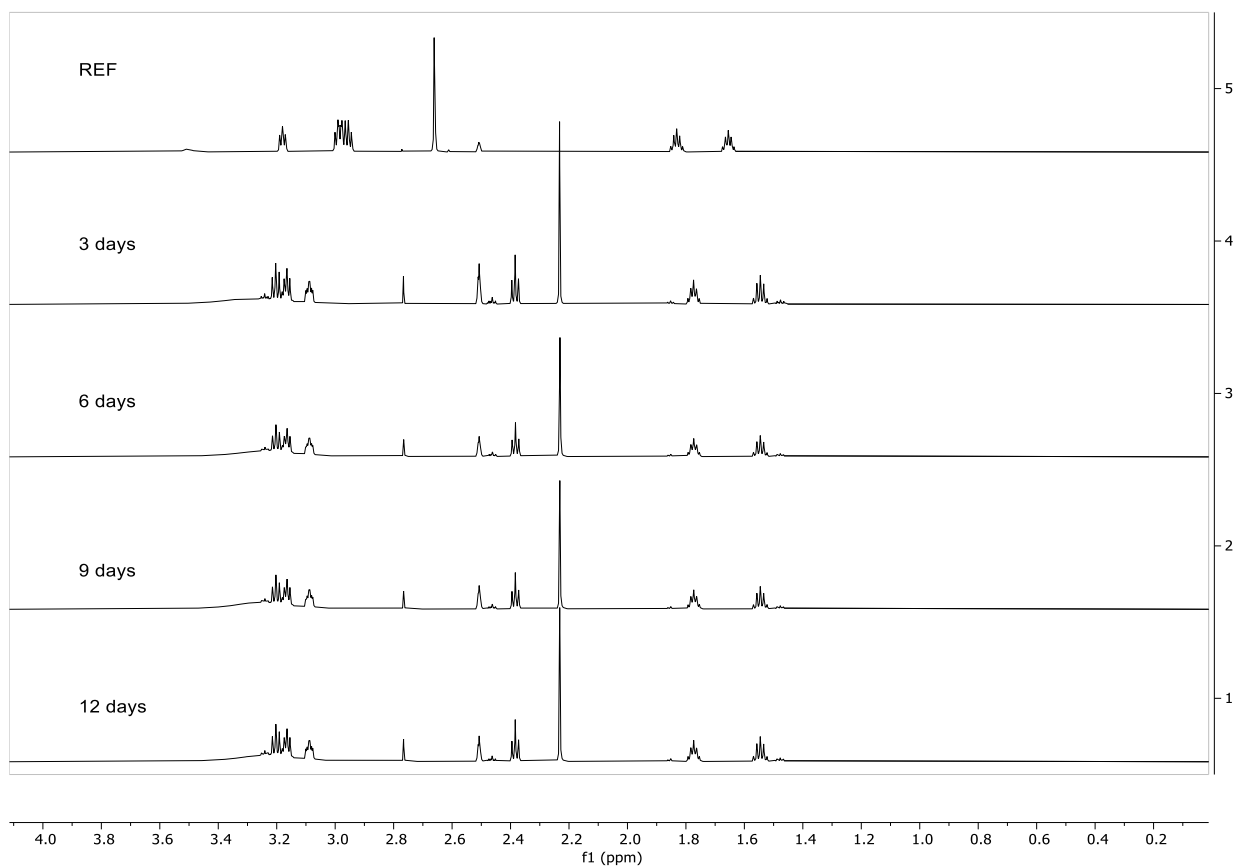

Figure S7  $^1\text{H}$  NMR 1 molar equivalent of mTBD, 5 molar equivalents of water.

| Structure                                                                                   | Time    | Integral N-Methyl | Integral HP1 | Integral HP2 | % HP  |
|---------------------------------------------------------------------------------------------|---------|-------------------|--------------|--------------|-------|
| 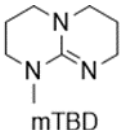<br>mTBD | 3 days  | 0.00              | 33879300.00  | 3440250.00   | 100.0 |
|                                                                                             | 6 days  | 0.00              | 32486700.00  | 3612440.00   | 100.0 |
|                                                                                             | 9 days  | 0.00              | 43720700.00  | 4180940.00   | 100.0 |
|                                                                                             | 12 days | 0.00              | 38301600.00  | 3354290.00   | 100.0 |

Table S8 1 molar equivalent of mTBD, 10 molar equivalents of water.



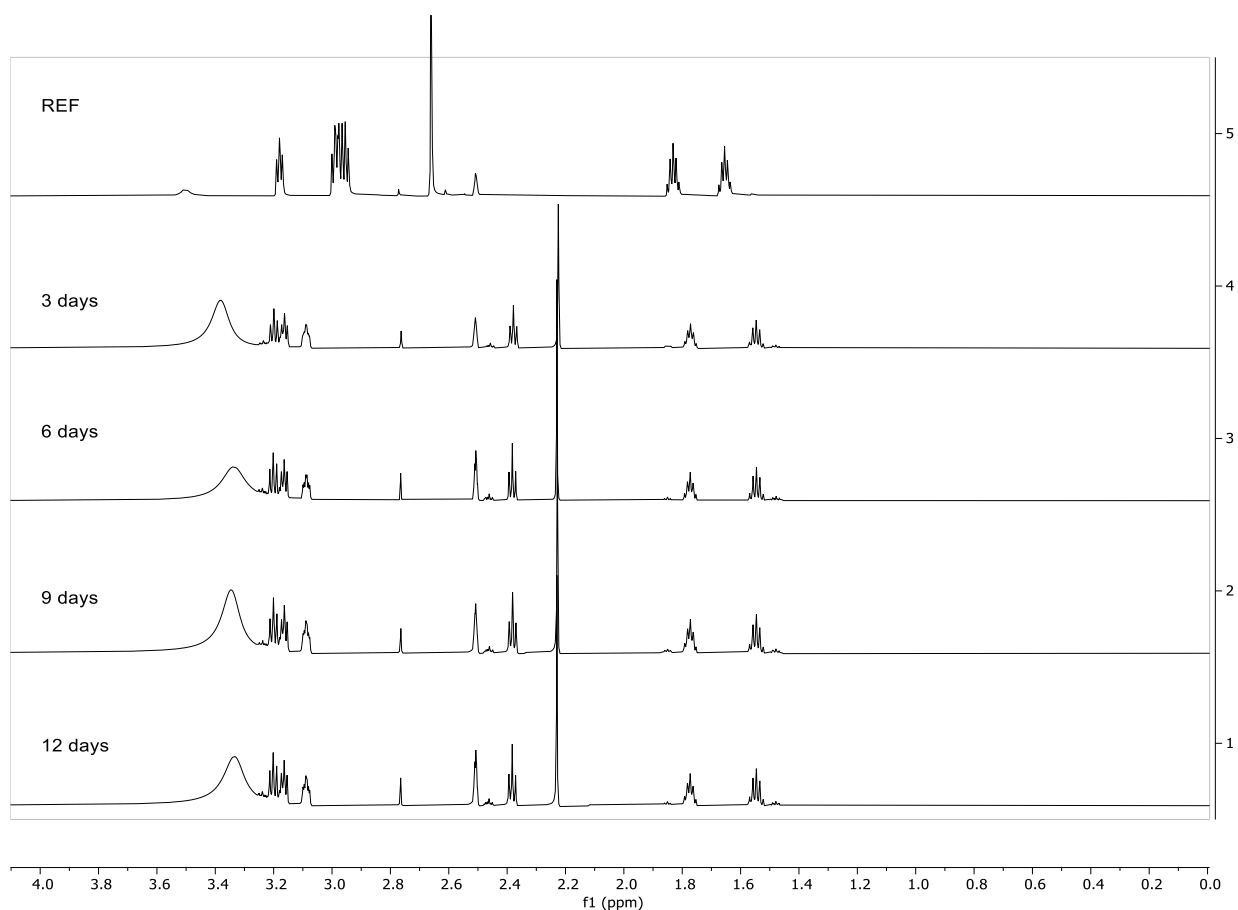

Figure S8  $^1\text{H}$  NMR 1 molar equivalent of mTBD, 10 molar equivalents of water.

c. mTBD + water at 90°C over 12 days ii

| Structure                                                                                   | Time    | Integral N-Methyl | Integral HP1 | Integral HP2 | % HP |
|---------------------------------------------------------------------------------------------|---------|-------------------|--------------|--------------|------|
| 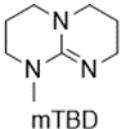<br>mTBD | 3 days  | 5611830.00        | 63214100.00  | 22555800.00  | 93.9 |
|                                                                                             | 6 days  | 2818780.00        | 68185600.00  | 24201800.00  | 97.0 |
|                                                                                             | 9 days  | 1429390.00        | 59225600.00  | 21150500.00  | 98.3 |
|                                                                                             | 12 days | 1253480.00        | 74068200.00  | 26649700.00  | 98.8 |

Table S9 1 molar equivalent of mTBD, 1 molar equivalent of water.

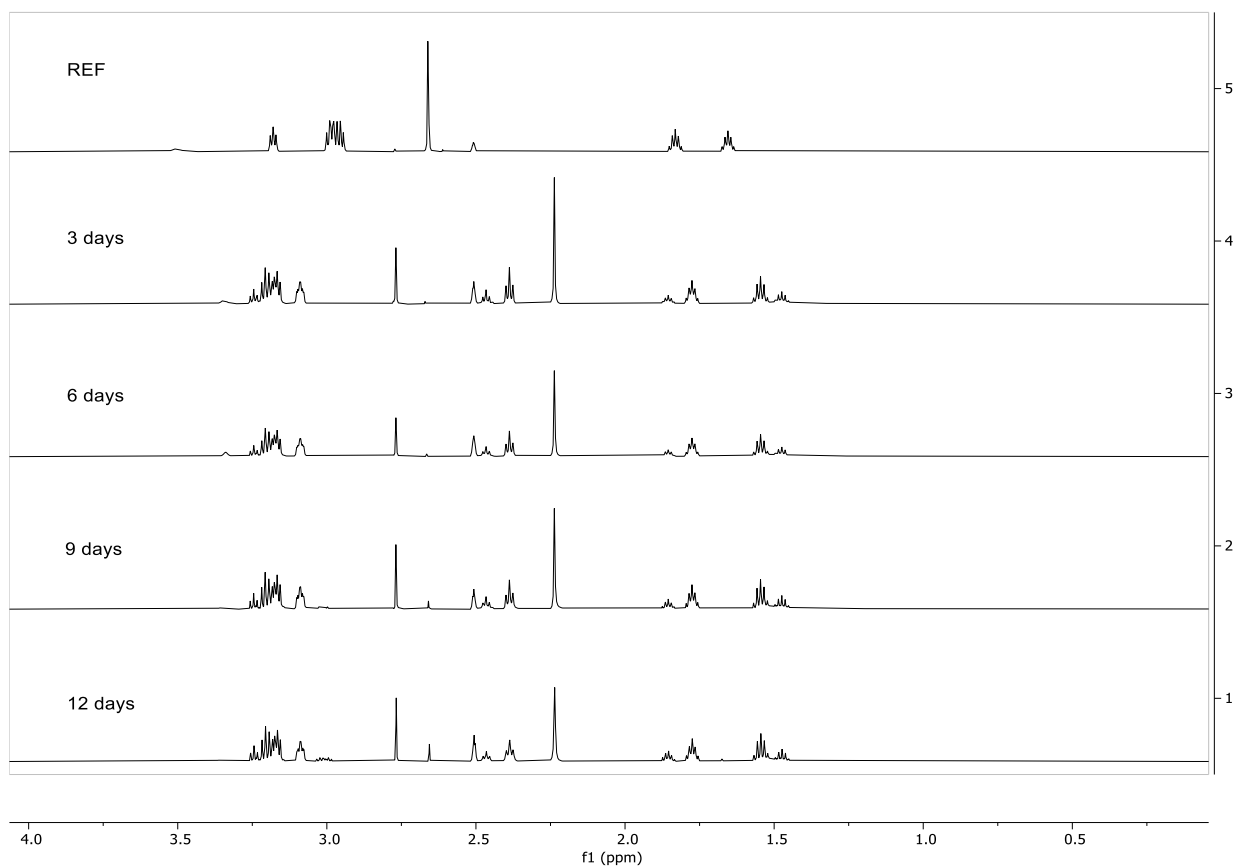

Figure S9 <sup>1</sup>H NMR 1 molar equivalent of mTBD, 1 molar equivalent of water.

| Structure                                                                                   | Time    | Integral N-Methyl | Integral HP1 | Integral HP2 | % HP  |
|---------------------------------------------------------------------------------------------|---------|-------------------|--------------|--------------|-------|
| 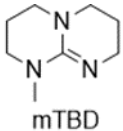<br>mTBD | 3 days  | 0.00              | 47127000.00  | 8310870.00   | 100.0 |
|                                                                                             | 6 days  | 0.00              | 48657200.00  | 8385540.00   | 100.0 |
|                                                                                             | 9 days  | 0.00              | 52552900.00  | 9431320.00   | 100.0 |
|                                                                                             | 12 days | 0.00              | 48272300.00  | 8594880.00   | 100.0 |

Table S10 1 molar equivalent of mTBD, 5 molar equivalents of water.

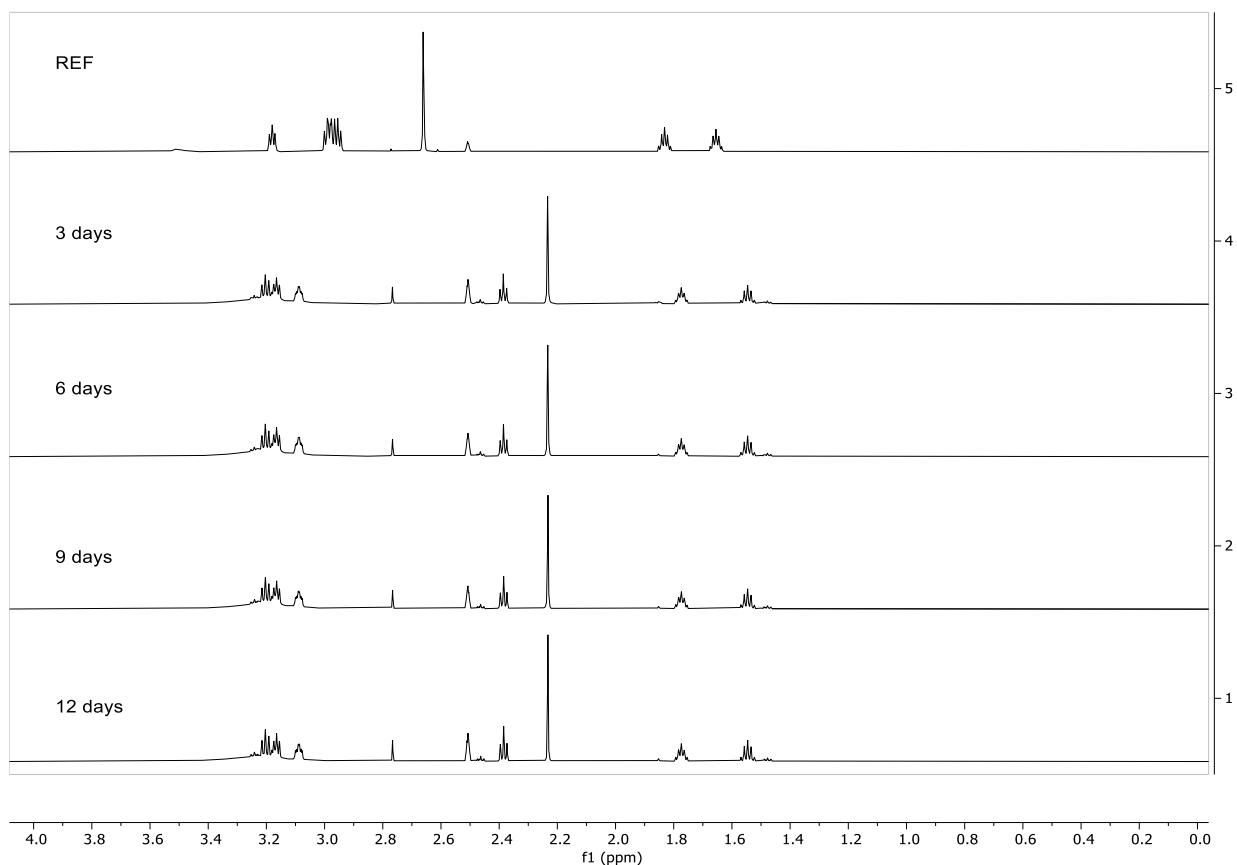

Figure S10 <sup>1</sup>H NMR 1 molar equivalent of mTBD, 5 molar equivalents of water.

| Structure                                                                                   | Time    | Integral N-Methyl | Integral HP1 | Integral HP2 | % HP  |
|---------------------------------------------------------------------------------------------|---------|-------------------|--------------|--------------|-------|
| 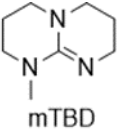<br>mTBD | 3 days  | 0.00              | 50046700.00  | 6751130.00   | 100.0 |
|                                                                                             | 6 days  | 0.00              | 45558200.00  | 6112740.00   | 100.0 |
|                                                                                             | 9 days  | 0.00              | 50808000.00  | 6892850.00   | 100.0 |
|                                                                                             | 12 days | 0.00              | 47964500.00  | 6610730.00   | 100.0 |

Table S11 1 molar equivalent of mTBD, 10 molar equivalents of water.

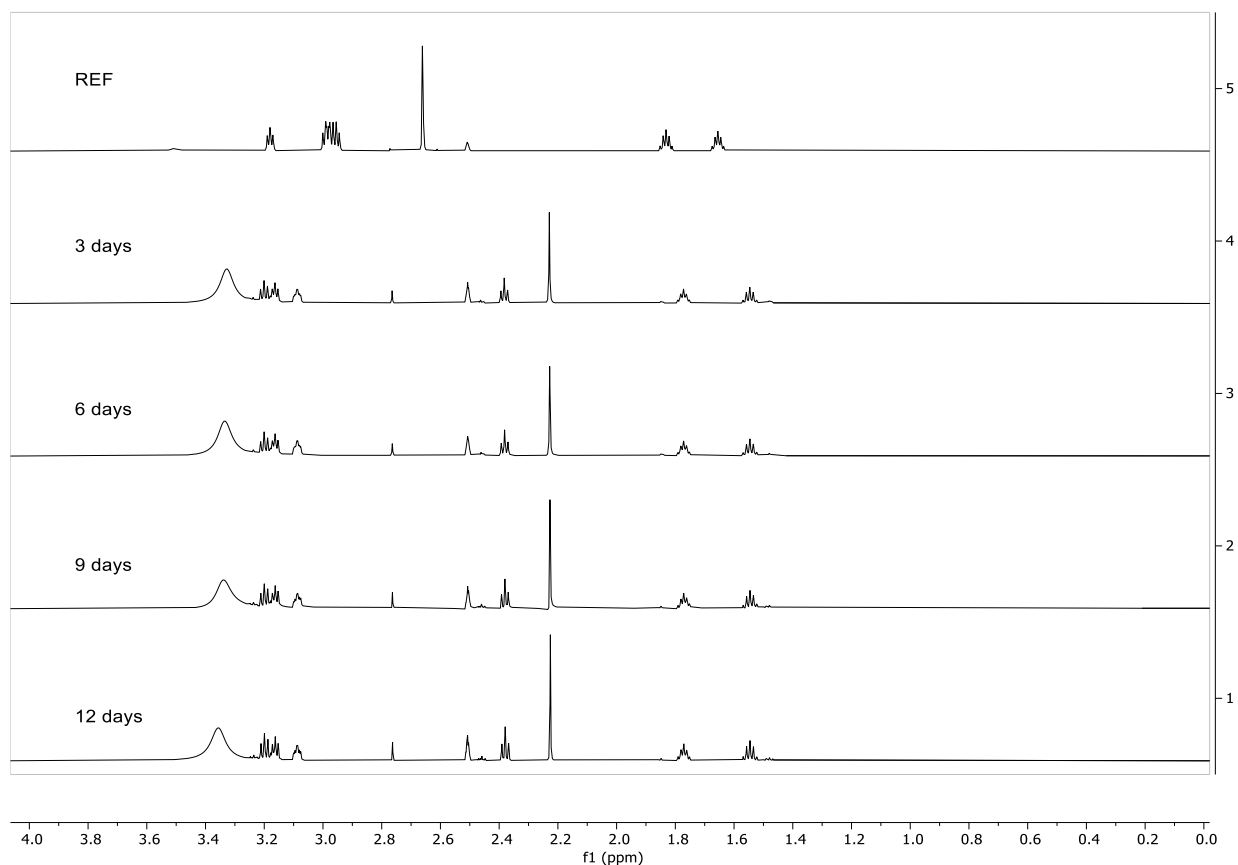

Figure S 11  $^1\text{H}$  NMR 1 molar equivalent of mTBD, 10 molar equivalents of water.

d. mTBD + water + DMSO

| Structure                                                                                   | Time | Integral N-Methyl | Integral HP1 | Integral HP2 | % HP  |
|---------------------------------------------------------------------------------------------|------|-------------------|--------------|--------------|-------|
| 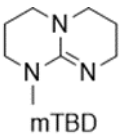<br>mTBD | REF  | 80304400.00       | 313941.00    | 925844.00    | 0     |
|                                                                                             | 1h   | 90989700.00       | 13592800.00  | 12083500.00  | 22.00 |
|                                                                                             | 2h   | 80006200.00       | 19622800.00  | 12936900.00  | 28.92 |
|                                                                                             | 3h   | 73634200.00       | 23690100.00  | 13275700.00  | 33.42 |
|                                                                                             | 4h   | 68351700.00       | 27199100.00  | 14034100.00  | 37.62 |
|                                                                                             | 5h   | 56600700.00       | 26543600.00  | 12691600.00  | 40.93 |
|                                                                                             | 6h   | 41732100.00       | 26601800.00  | 11279900.00  | 47.58 |
|                                                                                             | 7h   | 44752400.00       | 30489400.00  | 12703900.00  | 49.11 |
|                                                                                             | 8h   | 45468900.00       | 33259900.00  | 13719200.00  | 50.81 |
|                                                                                             | 24h  | 30445800.00       | 47901200.00  | 16919300.00  | 68.04 |
|                                                                                             | 48h  | 23824700.00       | 60594500.00  | 20068200.00  | 77.19 |

Table S12 1 molar equivalent of mTBD, 1 molar equivalent of water and 0.2 molar equivalent of DMSO.

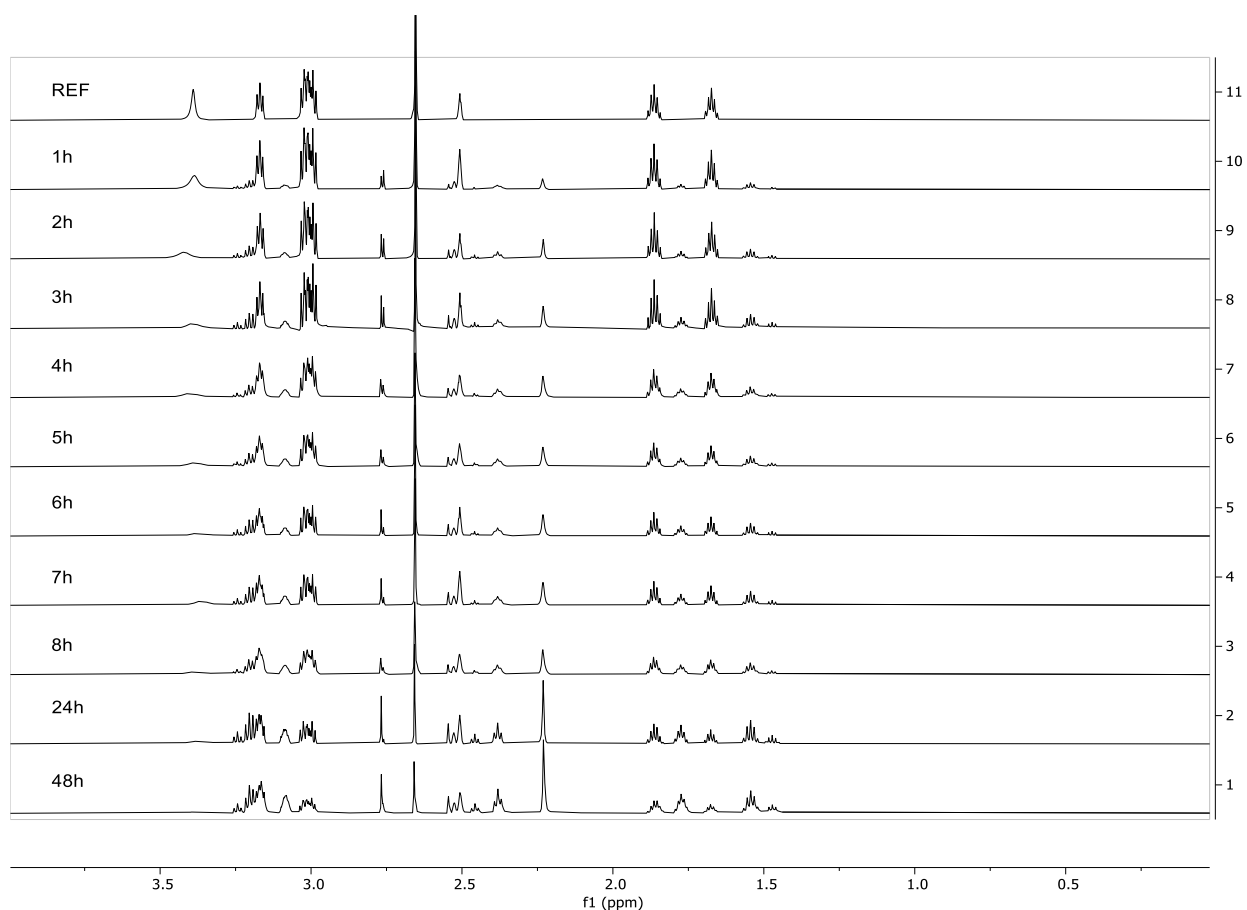

Figure S12  $^1\text{H}$  NMR 1 molar equivalent of mTBD, 1 molar equivalent of water and 0.2 molar equivalent of DMSO.

| Structure                                                                                   | Time | Integral N-Methyl | Integral HP1 | Integral HP2 | % HP  |
|---------------------------------------------------------------------------------------------|------|-------------------|--------------|--------------|-------|
| 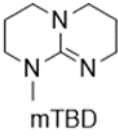<br>mTBD | REF  | 74518400.00       | 354200.00    | 934315.00    | 0     |
|                                                                                             | 1h   | 86659600.00       | 7764060.00   | 9478300.00   | 16.59 |
|                                                                                             | 2h   | 69258400.00       | 9985840.00   | 8642000.00   | 21.19 |
|                                                                                             | 3h   | 66610600.00       | 13451800.00  | 9169030.00   | 25.35 |
|                                                                                             | 4h   | 67132800.00       | 16946200.00  | 10574500.00  | 29.07 |
|                                                                                             | 5h   | 56562900.00       | 17659100.00  | 9664520.00   | 32.57 |
|                                                                                             | 6h   | 51088300.00       | 21405000.00  | 10320900.00  | 38.30 |
|                                                                                             | 7h   | 65692200.00       | 29647000.00  | 13898000.00  | 39.86 |
|                                                                                             | 8h   | 44159800.00       | 21341500.00  | 9748930.00   | 41.31 |
|                                                                                             | 24h  | 28582000.00       | 32899200.00  | 11437500.00  | 60.80 |
|                                                                                             | 48h  | 25217800.00       | 47416400.00  | 15406100.00  | 71.36 |

Table S13 1 molar equivalent of mTBD, 1 molar equivalent of water and 0,5 molar equivalent of DMSO.

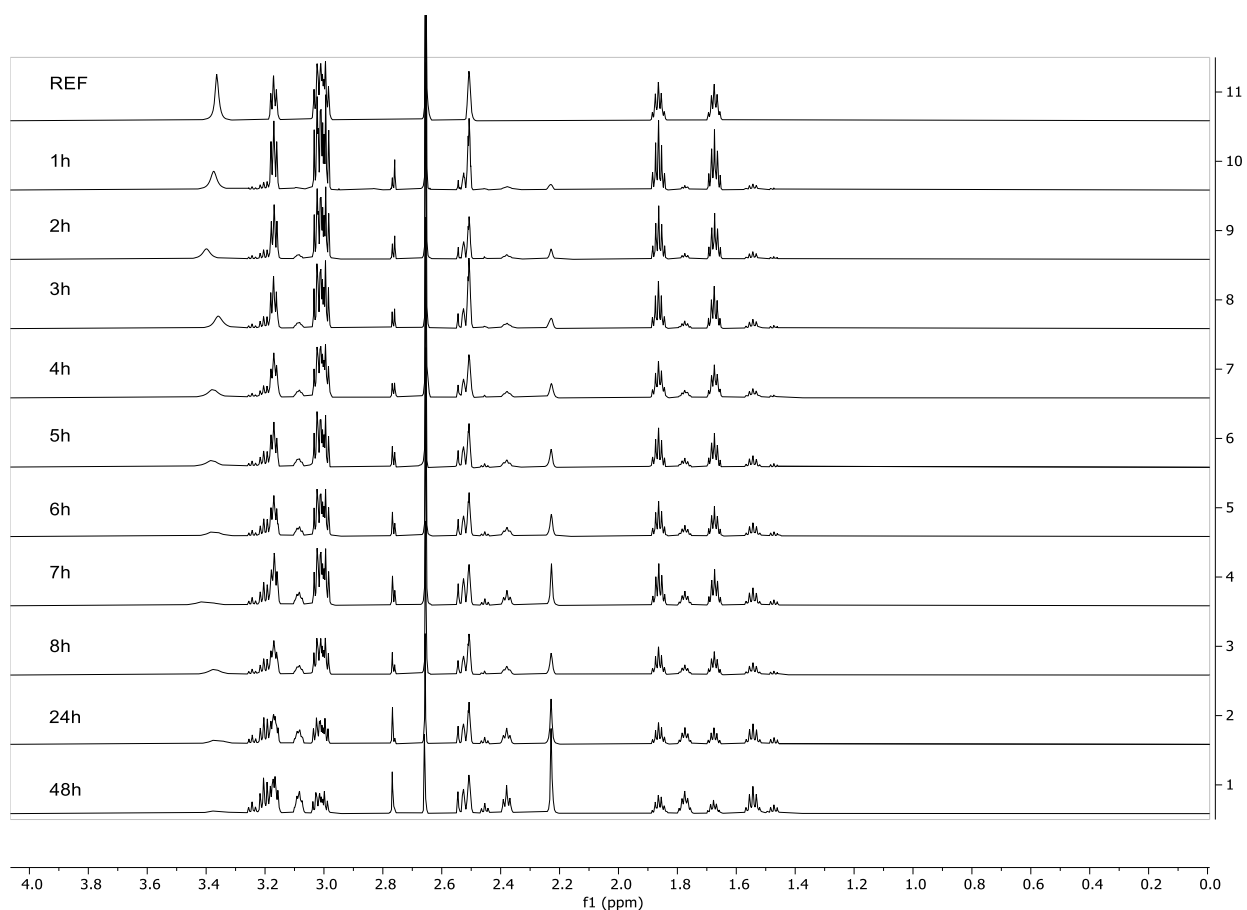

Figure S13  $^1\text{H}$  NMR 1 molar equivalent of mTBD, 1 molar equivalent of water and 0,5 molar equivalent of DMSO.

| Structure                                                                                   | Time | Integral N-Methyl | Integral HP1 | Integral HP2 | % HP  |
|---------------------------------------------------------------------------------------------|------|-------------------|--------------|--------------|-------|
| 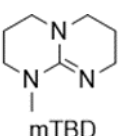<br>mTBD | REF  | 105297000.00      | 280451.00    | 1410160.00   | 0.00  |
|                                                                                             | 1h   | 70496500.00       | 3008510.00   | 6023000.00   | 11.36 |
|                                                                                             | 2h   | 83208800.00       | 6510630.00   | 8514220.00   | 15.30 |
|                                                                                             | 3h   | 82085300.00       | 8572670.00   | 8740020.00   | 17.42 |
|                                                                                             | 4h   | 61157500.00       | 8051330.00   | 7243850.00   | 20.01 |
|                                                                                             | 5h   | 71685800.00       | 11723800.00  | 9133510.00   | 22.54 |
|                                                                                             | 6h   | 67988000.00       | 15046500.00  | 9880550.00   | 26.83 |
|                                                                                             | 7h   | 62366100.00       | 15284200.00  | 9167420.00   | 28.16 |
|                                                                                             | 8h   | 54559800.00       | 14170400.00  | 8313820.00   | 29.18 |
|                                                                                             | 24h  | 44850900.00       | 31106600.00  | 11547800.00  | 48.74 |
|                                                                                             | 48h  | 37936800.00       | 41952100.00  | 13917400.00  | 59.56 |

Table S14 1 molar equivalent of mTBD, 1 molar equivalent of water and 1 molar equivalent of DMSO.

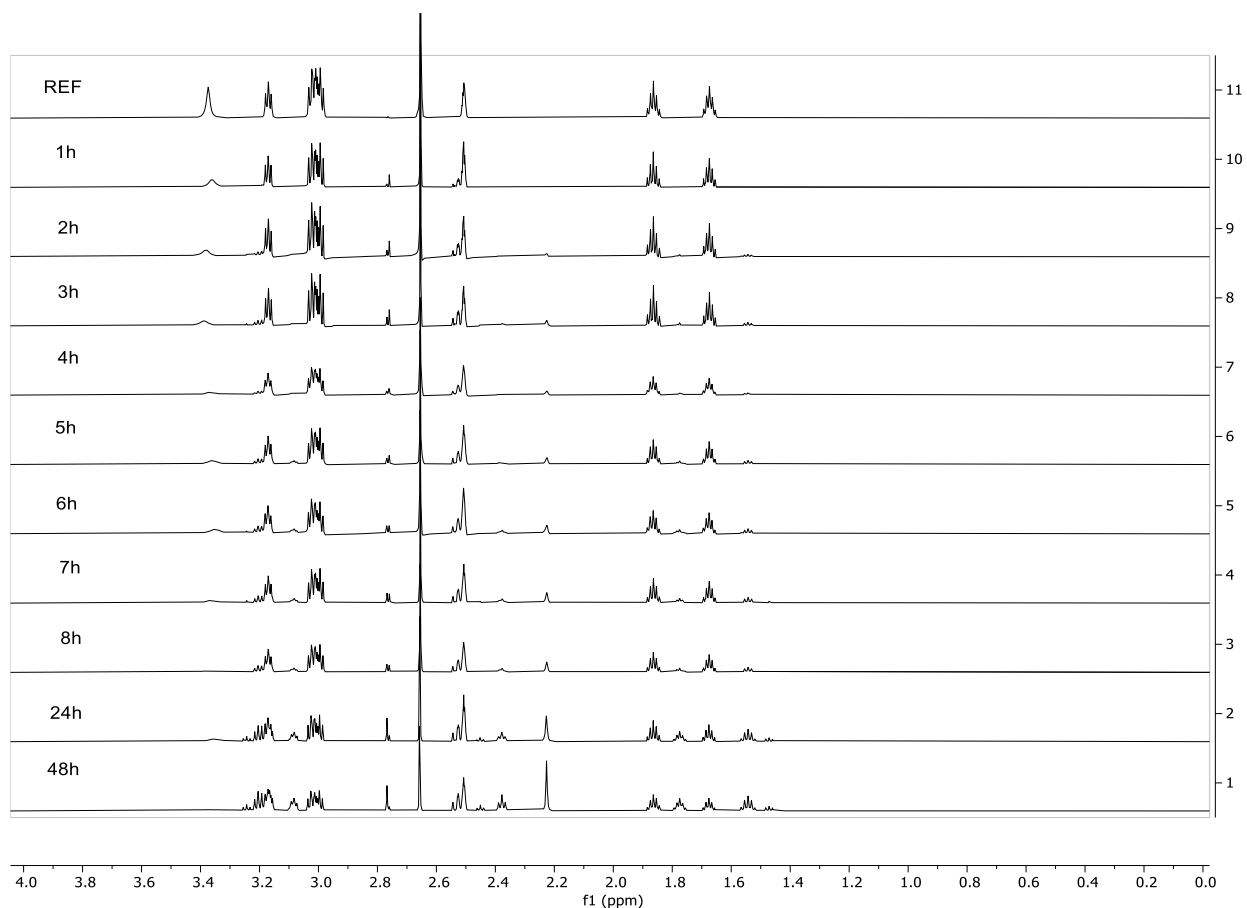

Figure S14  $^1\text{H}$  NMR 1 molar equivalent of mTBD, 1 molar equivalent of water and 1 molar equivalent of DMSO.

| Structure                                                                                   | Time | integral N-Methyl | integral HP1 | integral HP2 | % HP  |
|---------------------------------------------------------------------------------------------|------|-------------------|--------------|--------------|-------|
| 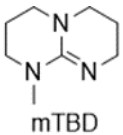<br>mTBD | REF  | 107735000.00      | 399917.00    | 1429700.00   | 0.00  |
|                                                                                             | 1h   | 57110400.00       | 1016910.00   | 3700660.00   | 7.63  |
|                                                                                             | 2h   | 69968300.00       | 2171010.00   | 5134850.00   | 9.45  |
|                                                                                             | 3h   | 79551300.00       | 3435100.00   | 6420420.00   | 11.02 |
|                                                                                             | 4h   | 73065200.00       | 4053290.00   | 6404430.00   | 12.52 |
|                                                                                             | 5h   | 66921800.00       | 4801000.00   | 6176480.00   | 14.09 |
|                                                                                             | 6h   | 66192300.00       | 6962910.00   | 6642940.00   | 17.05 |
|                                                                                             | 7h   | 66146900.00       | 7626960.00   | 7068510.00   | 18.18 |
|                                                                                             | 8h   | 69419200.00       | 8766100.00   | 7521310.00   | 19.00 |
|                                                                                             | 24h  | 52975100.00       | 19011600.00  | 8405880.00   | 34.10 |
|                                                                                             | 48h  | 47498100.00       | 29096300.00  | 10817300.00  | 45.66 |

Table S15 1 molar equivalent of mTBD, 1 molar equivalent of water and 2 molar equivalents of DMSO.

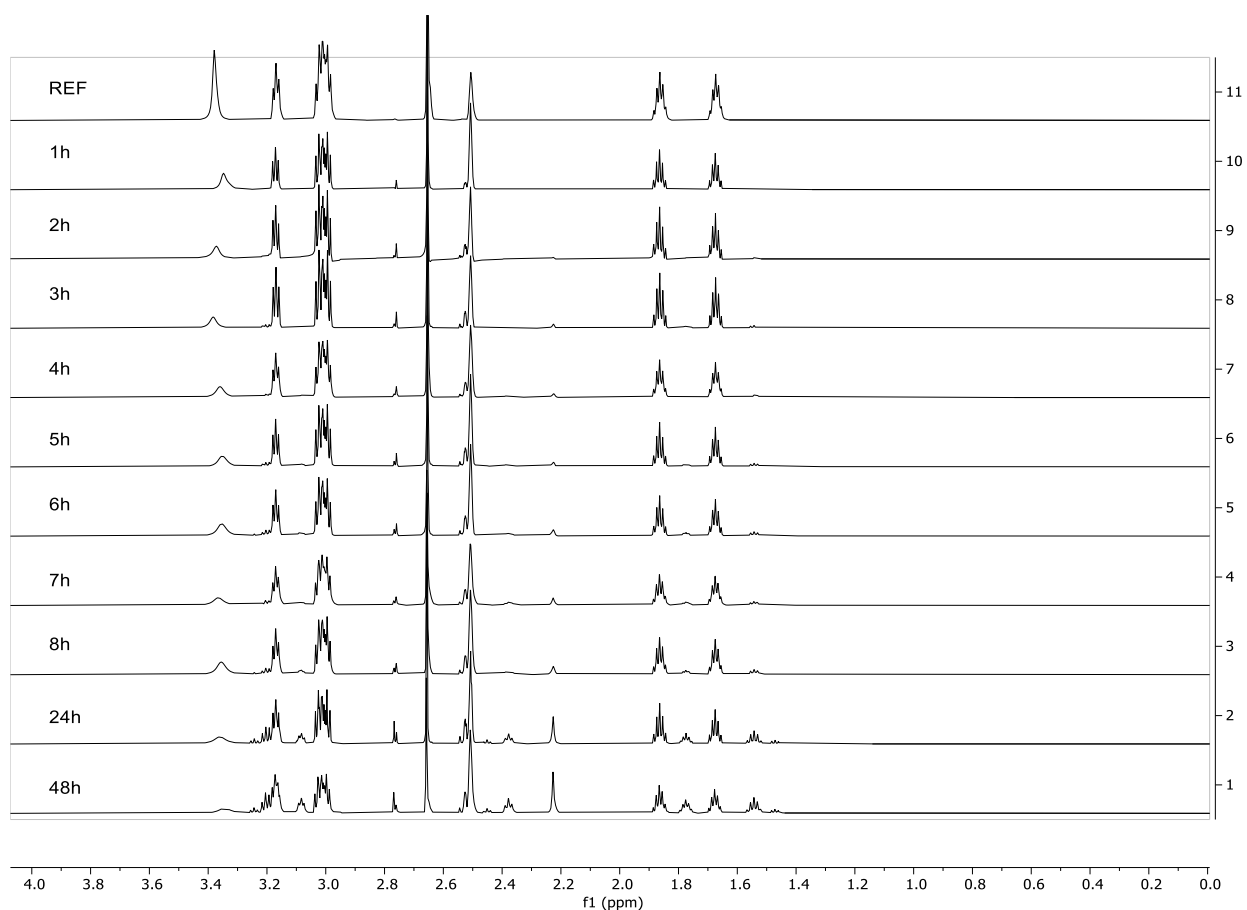

Figure S15  $^1\text{H}$  NMR 1 molar equivalent of mTBD, 1 molar equivalent of water and 2 molar equivalents of DMSO.

e. mTBD + water + ethylene glycol

| Structure                                                                                   | Time | integral N-Methyl | integral HP1 | integral HP2 | % HP  |
|---------------------------------------------------------------------------------------------|------|-------------------|--------------|--------------|-------|
| 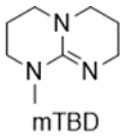<br>mTBD | REF  | 101637000.00      | 2338860.00   | 1886920.00   | 0.00  |
|                                                                                             | 1h   | 59518200.00       | 19753300.00  | 5130870.00   | 29.48 |
|                                                                                             | 2h   | 55699800.00       | 30313100.00  | 7804940.00   | 40.63 |
|                                                                                             | 3h   | 50190100.00       | 36400400.00  | 9640300.00   | 47.84 |
|                                                                                             | 4h   | 44738400.00       | 37813300.00  | 10400900.00  | 51.87 |
|                                                                                             | 5h   | 40273100.00       | 38969200.00  | 10745700.00  | 55.25 |
|                                                                                             | 6h   | 35088600.00       | 37114800.00  | 9623170.00   | 57.12 |
|                                                                                             | 7h   | 34798900.00       | 41089800.00  | 11427000.00  | 60.15 |
|                                                                                             | 8h   | 31488500.00       | 39794000.00  | 10868700.00  | 61.67 |
|                                                                                             | 24h  | 16679200.00       | 58613300.00  | 15440500.00  | 81.62 |
|                                                                                             | 48h  | 10852200.00       | 57332500.00  | 16473500.00  | 87.18 |

Table S16 1 molar equivalent of mTBD, 1 molar equivalent of water and 0.2 molar equivalent of ethylene glycol.



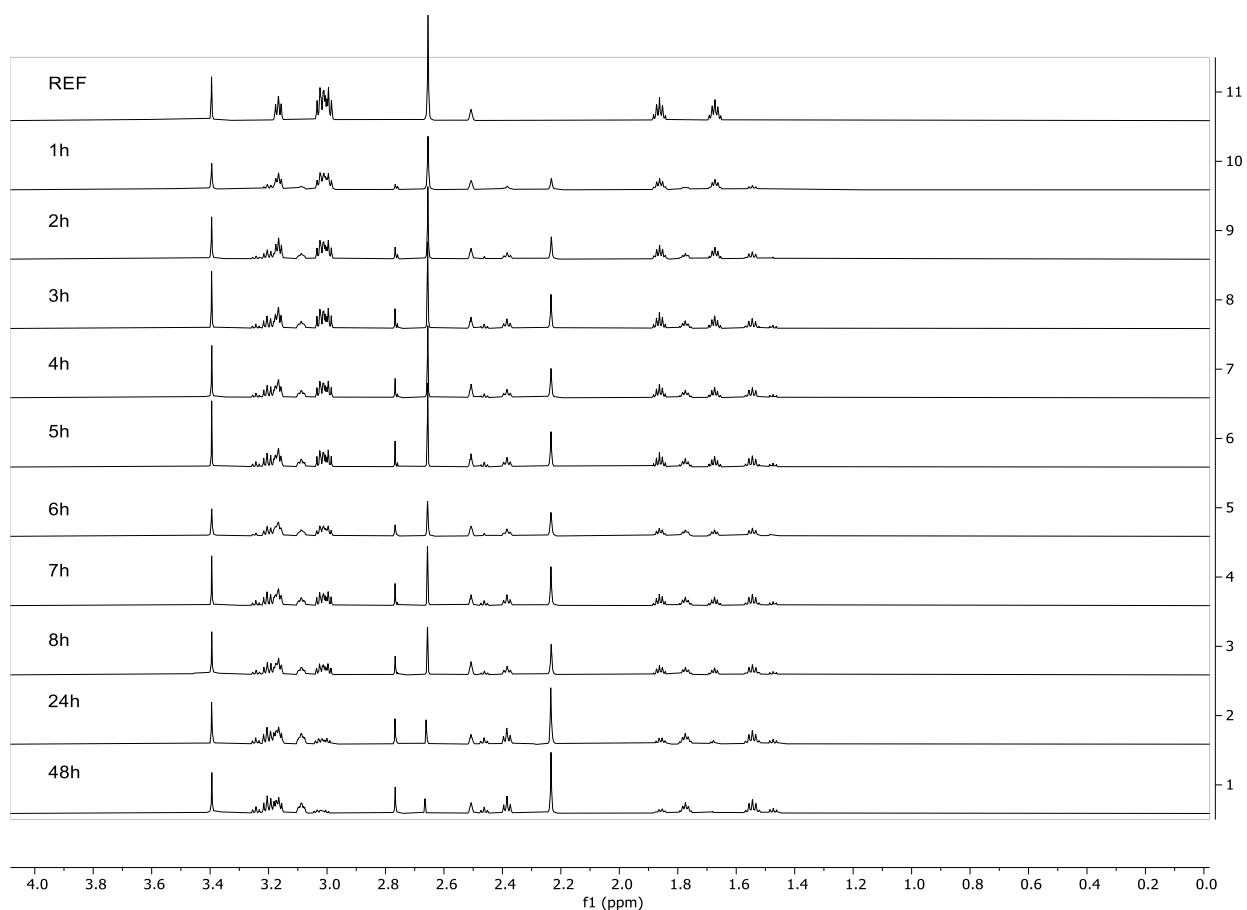

Figure S16  $^1\text{H}$  NMR 1 molar equivalent of mTBD, 1 molar equivalent of water and 0.2 molar equivalent of ethylene glycol.

| Structure                                                                                   | Time | Integral N-Methyl | Integral HP1 | Integral HP2 | % HP  |
|---------------------------------------------------------------------------------------------|------|-------------------|--------------|--------------|-------|
| 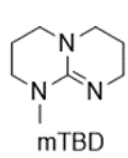<br>mTBD | REF  | 83272500.00       | 831256.00    | 958695.00    | 2.10  |
|                                                                                             | 1h   | 32020800.00       | 22846600.00  | 4938070.00   | 46.46 |
|                                                                                             | 2h   | 36391200.00       | 40042300.00  | 8794700.00   | 57.30 |
|                                                                                             | 3h   | 32608100.00       | 45712400.00  | 9875800.00   | 63.03 |
|                                                                                             | 4h   | 22586400.00       | 37223900.00  | 8134390.00   | 66.76 |
|                                                                                             | 5h   | 23820300.00       | 43920300.00  | 9878540.00   | 69.31 |
|                                                                                             | 6h   | 23906800.00       | 47765100.00  | 10645700.00  | 70.96 |
|                                                                                             | 7h   | 20459200.00       | 45431600.00  | 10438700.00  | 73.20 |
|                                                                                             | 8h   | 20016300.00       | 49185100.00  | 10847800.00  | 75.00 |
|                                                                                             | 24h  | 9530260.00        | 63227300.00  | 14880300.00  | 89.13 |
|                                                                                             | 48h  | 5975190.00        | 64834000.00  | 15373300.00  | 93.07 |

Table S17 1 molar equivalent of mTBD, 1 molar equivalent of water and 0.5 molar equivalent of ethylene glycol.

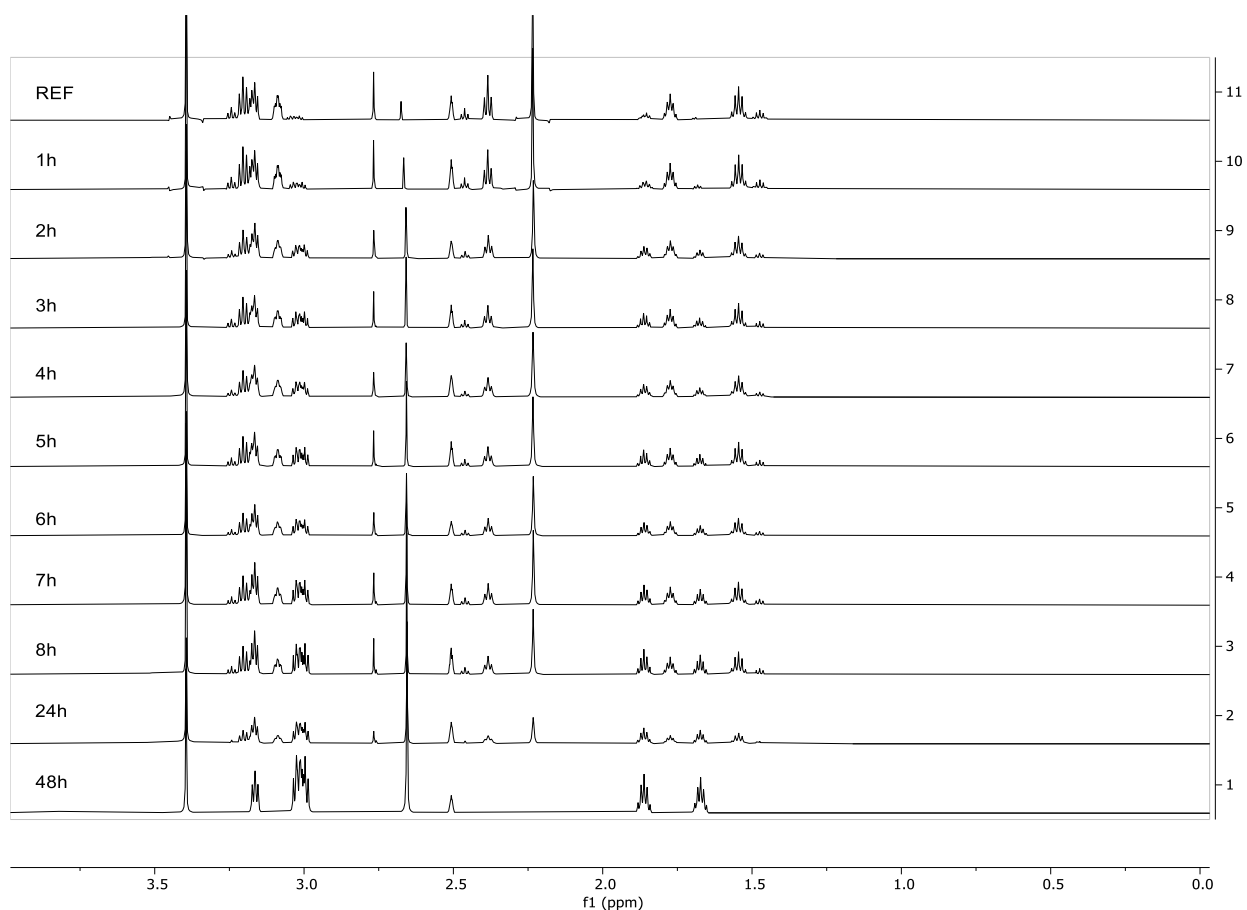

Figure S17  $^1\text{H}$  NMR 1 molar equivalent of mTBD, 1 molar equivalent of water and 0.5 molar equivalent of ethylene glycol.

| Structure                                                                                   | Time | Integral N-Methyl | Integral HP1 | Integral HP2 | % HP  |
|---------------------------------------------------------------------------------------------|------|-------------------|--------------|--------------|-------|
| 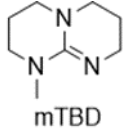<br>mTBD | REF  | 160593000.00      | 317402.00    | 2463730.00   | 0.00  |
|                                                                                             | 1h   | 29693000.00       | 28232300.00  | 7249260.00   | 54.44 |
|                                                                                             | 2h   | 19119400.00       | 31574400.00  | 7153250.00   | 66.95 |
|                                                                                             | 3h   | 21063700.00       | 46420300.00  | 10199700.00  | 72.89 |
|                                                                                             | 4h   | 13086400.00       | 37191100.00  | 7781090.00   | 77.46 |
|                                                                                             | 5h   | 10885000.00       | 36031700.00  | 7546230.00   | 80.01 |
|                                                                                             | 6h   | 14245400.00       | 54007400.00  | 11095400.00  | 82.05 |
|                                                                                             | 7h   | 13134200.00       | 55408200.00  | 11350300.00  | 83.56 |
|                                                                                             | 8h   | 10997600.00       | 50958200.00  | 10384400.00  | 84.80 |
|                                                                                             | 24h  | 3994760.00        | 63598000.00  | 12642600.00  | 95.02 |
|                                                                                             | 48h  | 1957590.00        | 57009300.00  | 11296500.00  | 97.21 |

Table S18 1 molar equivalent of mTBD, 1 molar equivalent of water and 1 molar equivalent of ethylene glycol.

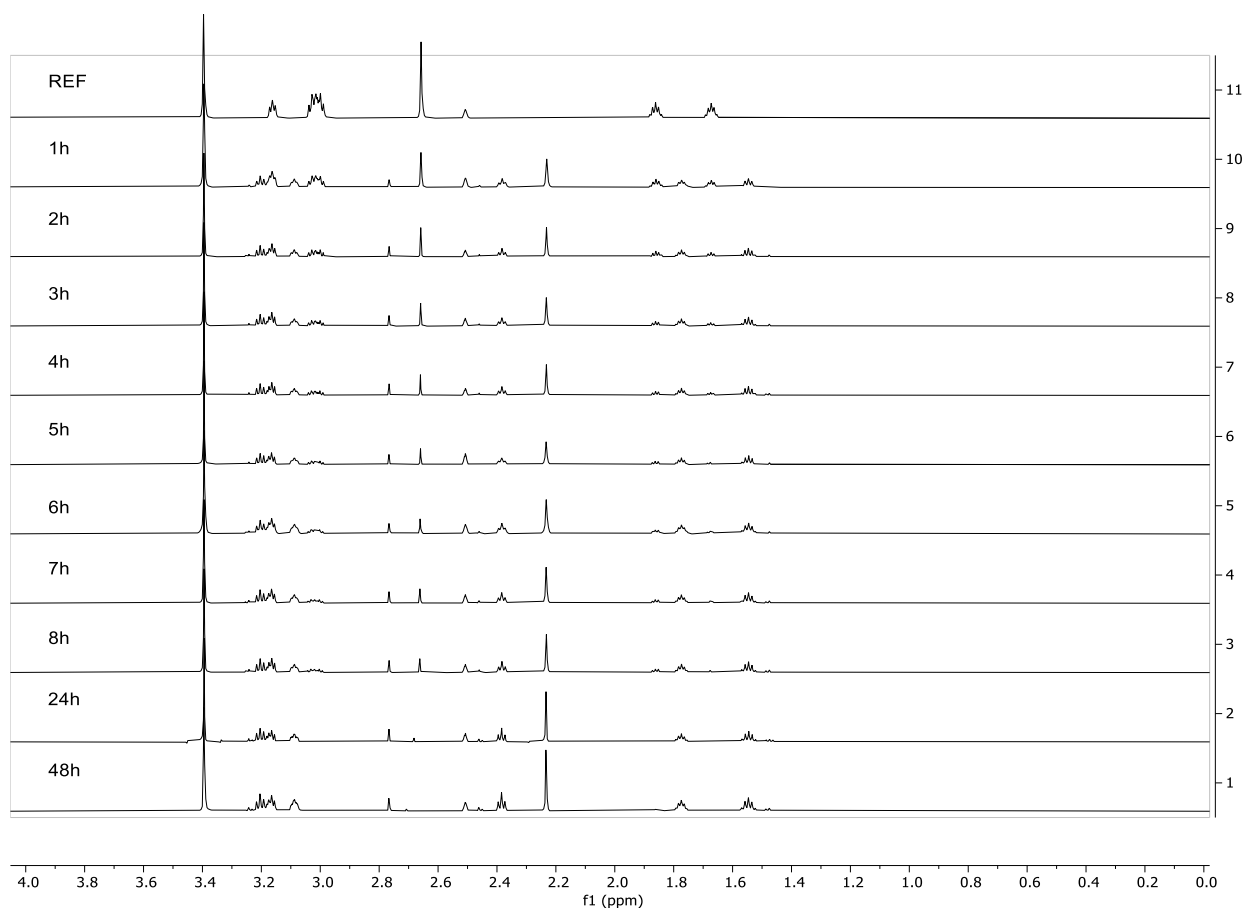

Figure S18  $^1\text{H}$  NMR 1 molar equivalent of mTBD, 1 molar equivalent of water and 1 molar equivalent of ethylene glycol.

| Structure                                                                                   | Time | Integral N-Methyl | Integral HP1 | Integral HP2 | % HP  |
|---------------------------------------------------------------------------------------------|------|-------------------|--------------|--------------|-------|
| 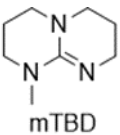<br>mTBD | REF  | 53764100.00       | 261020.00    | 587134.00    | 0.00  |
|                                                                                             | 1h   | 26655400.00       | 29669200.00  | 5278650.00   | 56.73 |
|                                                                                             | 2h   | 18458900.00       | 34995500.00  | 6127640.00   | 69.02 |
|                                                                                             | 3h   | 13176700.00       | 34909200.00  | 5978740.00   | 75.63 |
|                                                                                             | 4h   | 12591000.00       | 41913100.00  | 7239520.00   | 79.61 |
|                                                                                             | 5h   | 8116280.00        | 30694500.00  | 5186900.00   | 81.55 |
|                                                                                             | 6h   | 10398700.00       | 44845800.00  | 7550200.00   | 83.44 |
|                                                                                             | 7h   | 10843900.00       | 51075500.00  | 8905970.00   | 84.69 |
|                                                                                             | 8h   | 8664980.00        | 42866100.00  | 7556850.00   | 85.34 |
|                                                                                             | 24h  | 2814770.00        | 45432000.00  | 7662220.00   | 94.97 |
|                                                                                             | 48h  | 1254010.00        | 40111400.00  | 6901790.00   | 97.40 |

Table S19 1 molar equivalent of mTBD, 1 molar equivalent of water and 2 molar equivalents of ethylene glycol.

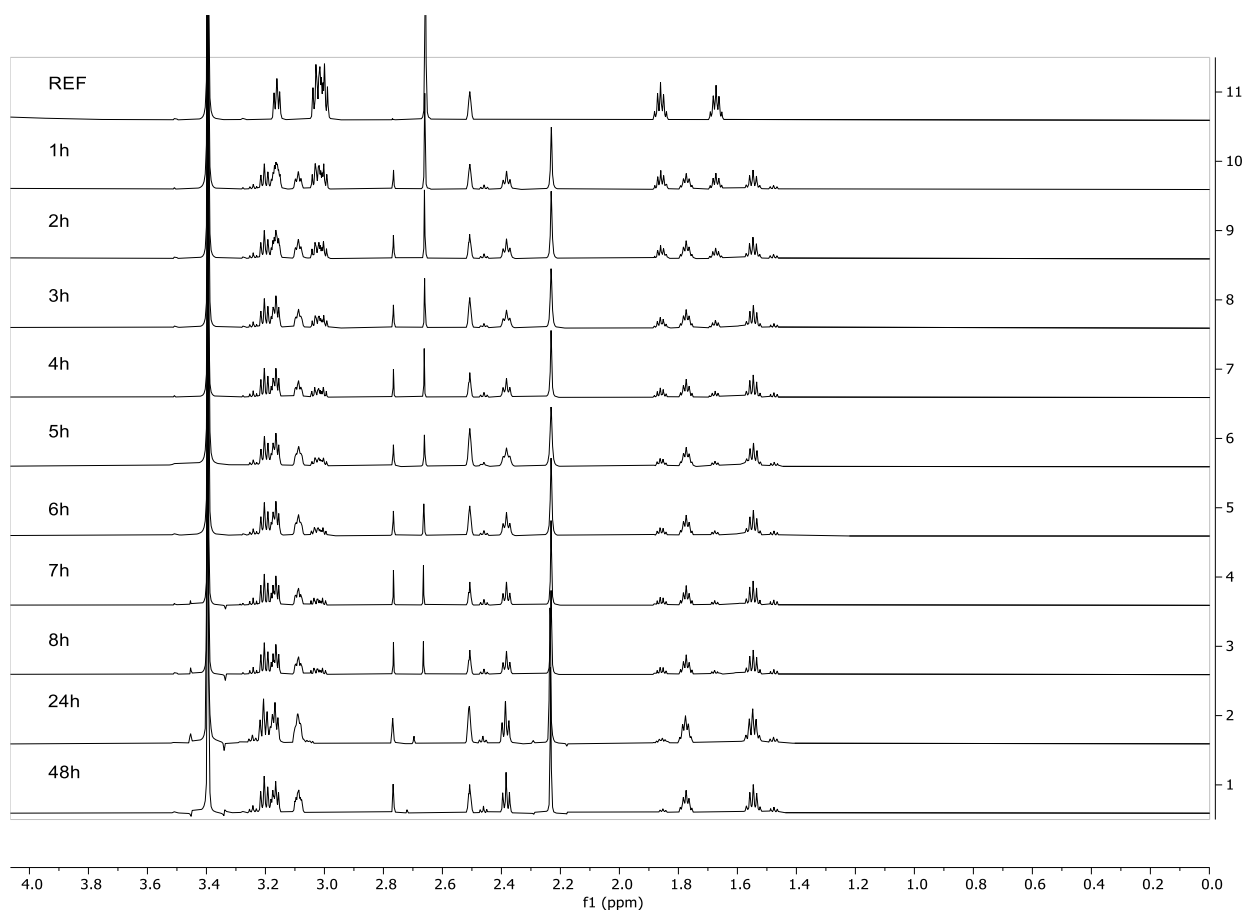

Figure S19  $^1\text{H}$  NMR 1 molar equivalent of mTBD, 1 molar equivalent of water and 2 molar equivalents of ethylene glycol.

f. mTBD + water + phenol

| Structure | Time | Integral N-Methyl | Integral HP1 | Integral HP2 | % HP  |
|-----------|------|-------------------|--------------|--------------|-------|
| <br>mTBD  | REF  | 188431000.00      | 255583.00    | 186864.00    | 0.00  |
|           | 1h   | 132630000.00      | 38859000.00  | 7659510.00   | 25.97 |
|           | 2h   | 51049600.00       | 30841400.00  | 5742480.00   | 41.75 |
|           | 3h   | 48355200.00       | 40225900.00  | 8551800.00   | 50.22 |
|           | 4h   | 33690300.00       | 37526700.00  | 8104810.00   | 57.53 |
|           | 5h   | 29636600.00       | 38827600.00  | 8244820.00   | 61.36 |
|           | 6h   | 30819200.00       | 46108400.00  | 9650150.00   | 64.40 |
|           | 7h   | 29817300.00       | 51218300.00  | 11240300.00  | 67.69 |
|           | 8h   | 21423100.00       | 38784800.00  | 7393220.00   | 68.31 |
|           | 24h  | 8100880.00        | 59035600.00  | 14278800.00  | 90.05 |
|           | 48h  | 5124640.00        | 70387400.00  | 16983200.00  | 94.46 |

Table S20 1 molar equivalent of mTBD, 1 molar equivalent of water and 0.2 molar equivalents of phenol.

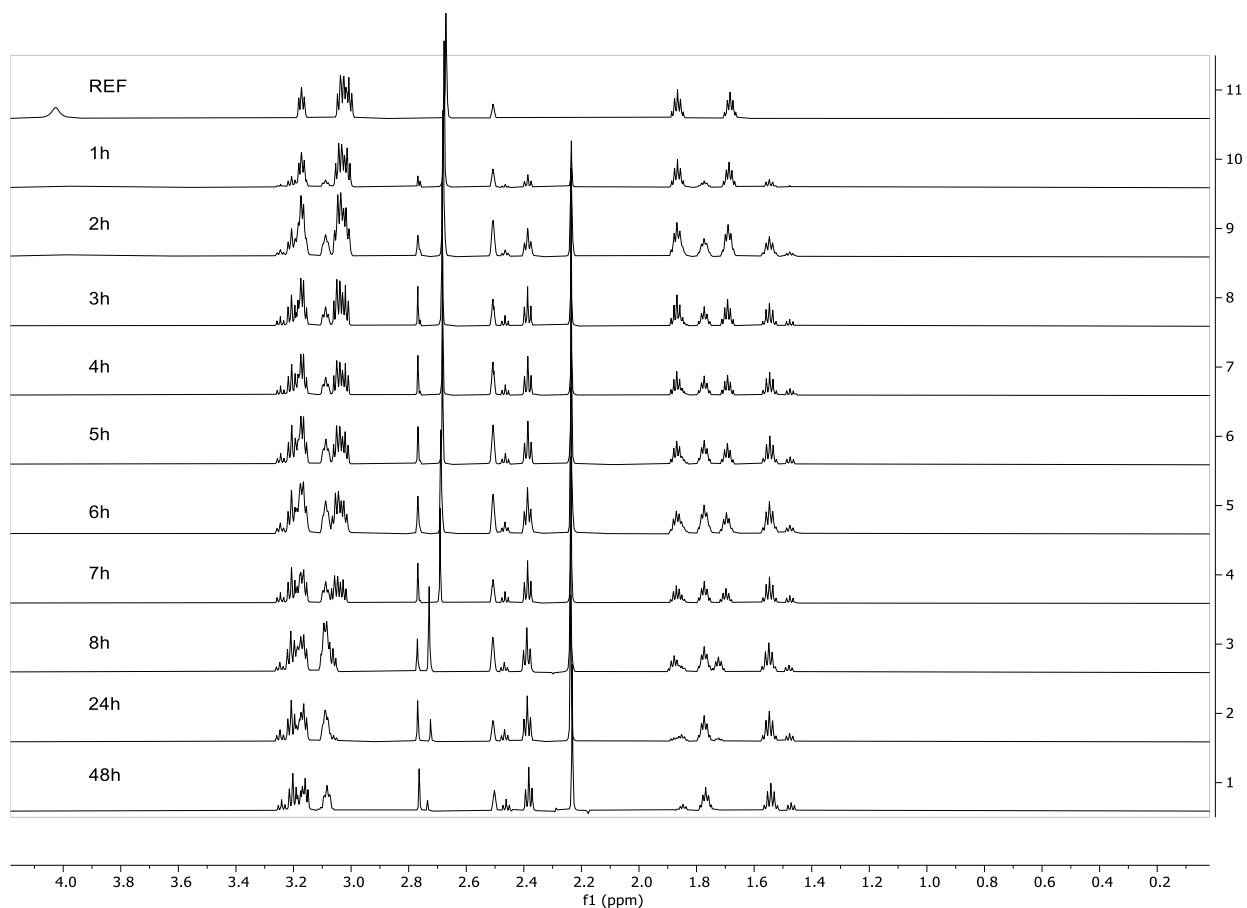

Figure S20  $^1\text{H}$  NMR 1 molar equivalent of mTBD, 1 molar equivalent of water and 0.2 molar equivalents of phenol.

| Structure                                                                                   | Time | Integral N-Methyl | Integral HP1 | Integral HP2 | % HP   |
|---------------------------------------------------------------------------------------------|------|-------------------|--------------|--------------|--------|
| 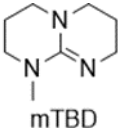<br>mTBD | REF  | 162782000.00      | 219307.00    | 182999.00    | 0.00   |
|                                                                                             | 1h   | 48431200.00       | 16193000.00  | 2806830.00   | 28.18  |
|                                                                                             | 2h   | 44145400.00       | 24692300.00  | 3722860.00   | 39.16  |
|                                                                                             | 3h   | 38600500.00       | 31492300.00  | 5852330.00   | 49.17  |
|                                                                                             | 4h   | 29971400.00       | 31680600.00  | 6185840.00   | 55.82  |
|                                                                                             | 5h   | 27823000.00       | 34598800.00  | 6864630.00   | 59.84  |
|                                                                                             | 6h   | 25372100.00       | 35882200.00  | 7311180.00   | 63.00  |
|                                                                                             | 7h   | 25967000.00       | 42331400.00  | 8584020.00   | 66.23  |
|                                                                                             | 8h   | 29051400.00       | 52059300.00  | 11628400.00  | 68.67  |
|                                                                                             | 24h  | 0.00              | 51846200.00  | 11324600.00  | 100.00 |
|                                                                                             | 48h  | 0.00              | 55558300.00  | 11922300.00  | 100.00 |

Table S21 1 molar equivalent of mTBD, 1 molar equivalent of water and 0.5 molar equivalent of phenol

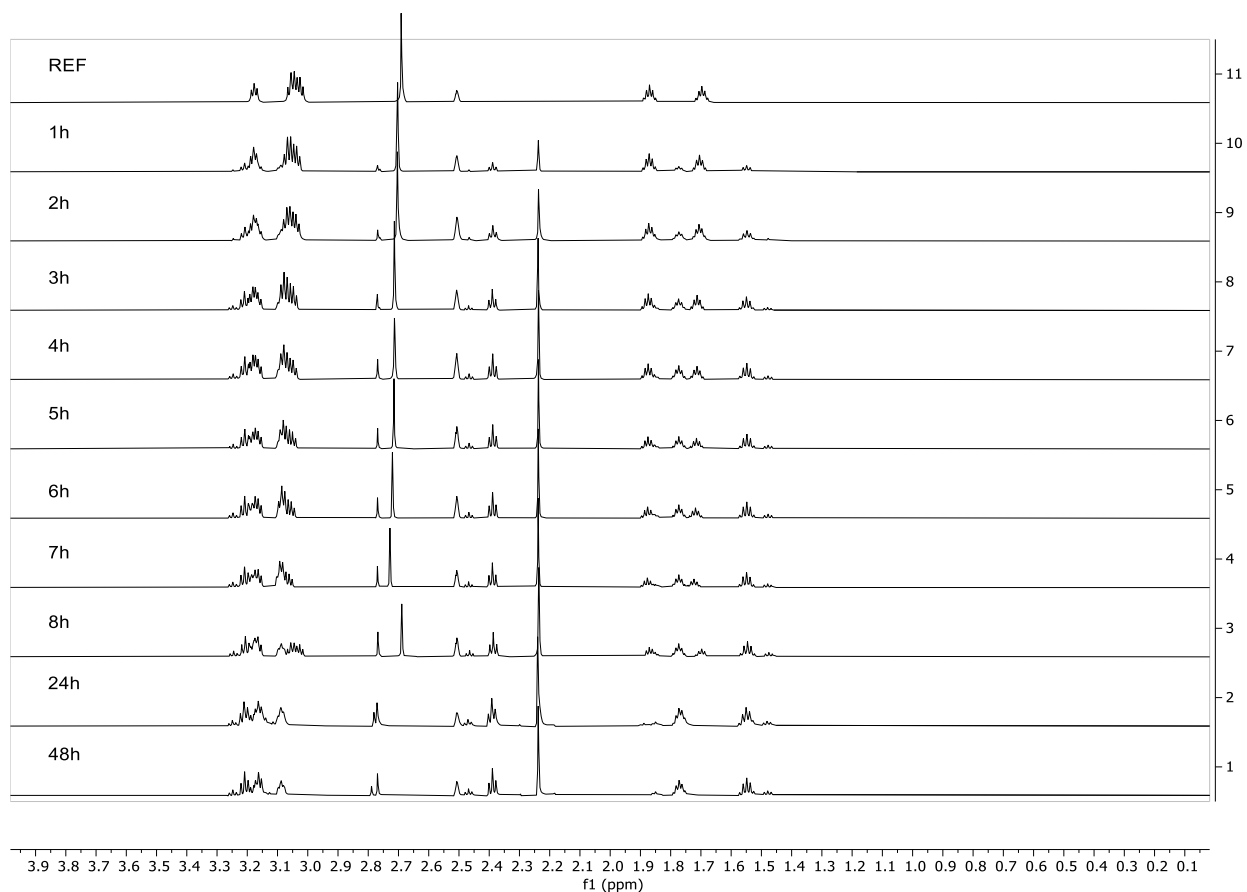

Figure S21  $^1\text{H}$  NMR 1 molar equivalent of mTBD, 1 molar equivalent of water and 0.5 molar equivalents of phenol.

| Structure                                                                                   | Time | Integral N-Methyl | Integral HP1 | Integral HP2 | % HP  |
|---------------------------------------------------------------------------------------------|------|-------------------|--------------|--------------|-------|
| 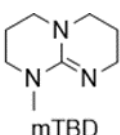<br>mTBD | REF  | 163954000.00      | 339939.00    | 85462.60     | 0.00  |
|                                                                                             | 1h   | 53853400.00       | 13723900.00  | 446666.00    | 20.83 |
|                                                                                             | 2h   | 58240400.00       | 24552600.00  | 167794.00    | 29.80 |
|                                                                                             | 3h   | 49454900.00       | 26742100.00  | 190070.00    | 35.26 |
|                                                                                             | 4h   | 35836000.00       | 23423800.00  | 212768.00    | 39.74 |
|                                                                                             | 5h   | 48031000.00       | 35764200.00  | 51059.50     | 42.72 |
|                                                                                             | 6h   | 42368200.00       | 34107500.00  | 109355.00    | 44.68 |
|                                                                                             | 7h   | 34769700.00       | 29574200.00  | 115970.00    | 46.06 |
|                                                                                             | 8h   | 31563000.00       | 29786700.00  | 220731.00    | 48.74 |
|                                                                                             | 24h  | 8777580.00        | 46883500.00  | 16073800.00  | 87.76 |
|                                                                                             | 48h  | 7675720.00        | 41188700.00  | 10633300.00  | 87.10 |

Table S22 1 molar equivalent of mTBD, 1 molar equivalent of water and 1 molar equivalents of phenol.

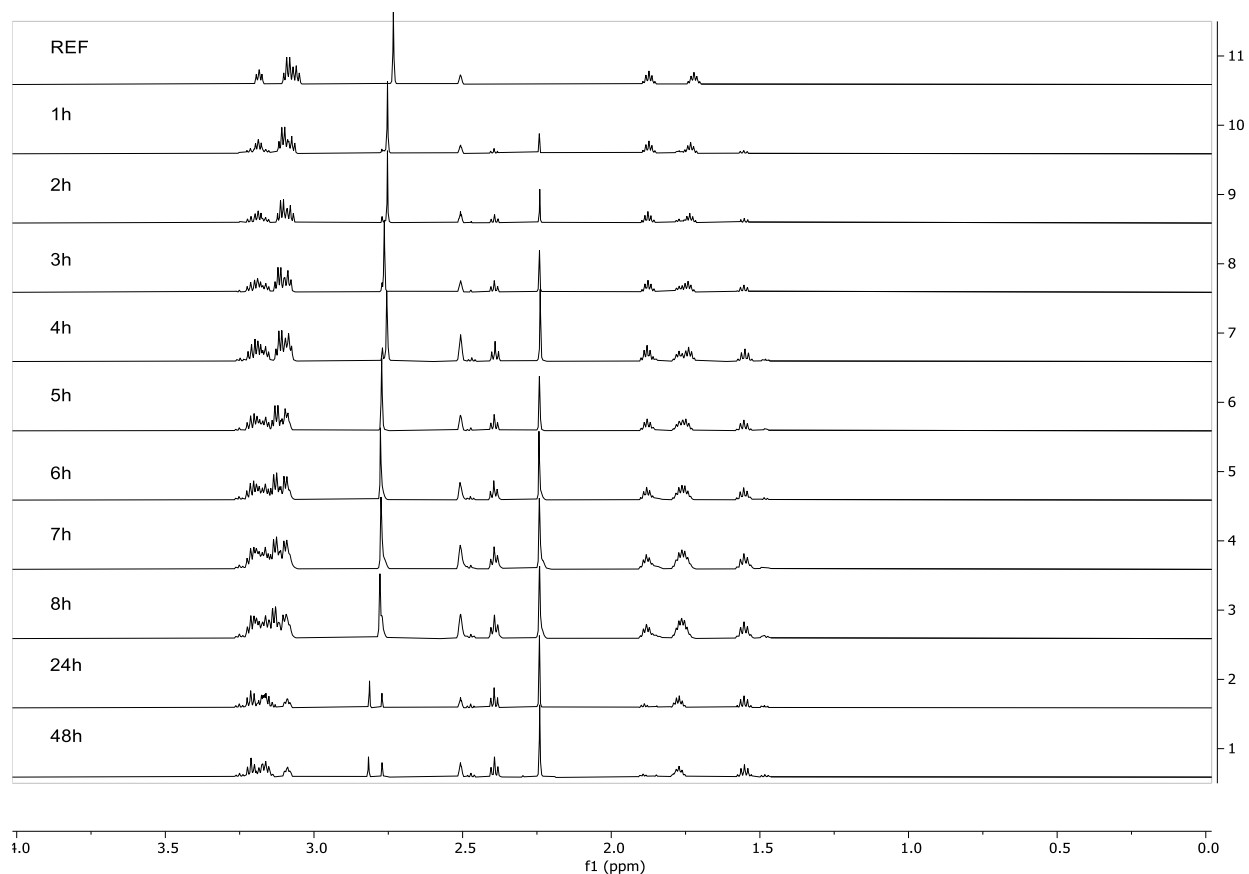

Figure S22 <sup>1</sup>H NMR 1 molar equivalent of mTBD, 1 molar equivalent of water and 1 molar equivalents of phenol.

| Structure                                                                                   | Time | Integral N-Methyl | Integral HP1 | Integral HP2 | % HP  |
|---------------------------------------------------------------------------------------------|------|-------------------|--------------|--------------|-------|
| 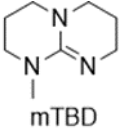<br>mTBD | REF  | 117958000.00      | 142888.00    | 137327.00    | 0.00  |
|                                                                                             | 1h   | 50833300.00       | 4570240.00   | 424332.00    | 8.95  |
|                                                                                             | 2h   | 49613900.00       | 7728280.00   | 426847.00    | 14.12 |
|                                                                                             | 3h   | 40225900.00       | 8427320.00   | 332492.00    | 17.88 |
|                                                                                             | 4h   | 44567000.00       | 11469700.00  | 402610.00    | 21.04 |
|                                                                                             | 5h   | 35819600.00       | 9947010.00   | 314668.00    | 22.27 |
|                                                                                             | 6h   | 34773700.00       | 10496500.00  | 465577.00    | 23.97 |
|                                                                                             | 7h   | 39862600.00       | 12803900.00  | 377254.00    | 24.85 |
|                                                                                             | 8h   | 29741700.00       | 10888400.00  | 9592870.00   | 40.78 |
|                                                                                             | 24h  | 3265000.00        | 23386600.00  | 30384800.00  | 94.28 |
|                                                                                             | 48h  | 1887130.00        | 27023400.00  | 26219600.00  | 96.58 |

Table S23 1 molar equivalent of mTBD, 1 molar equivalent of water and 2 molar equivalents of phenol.

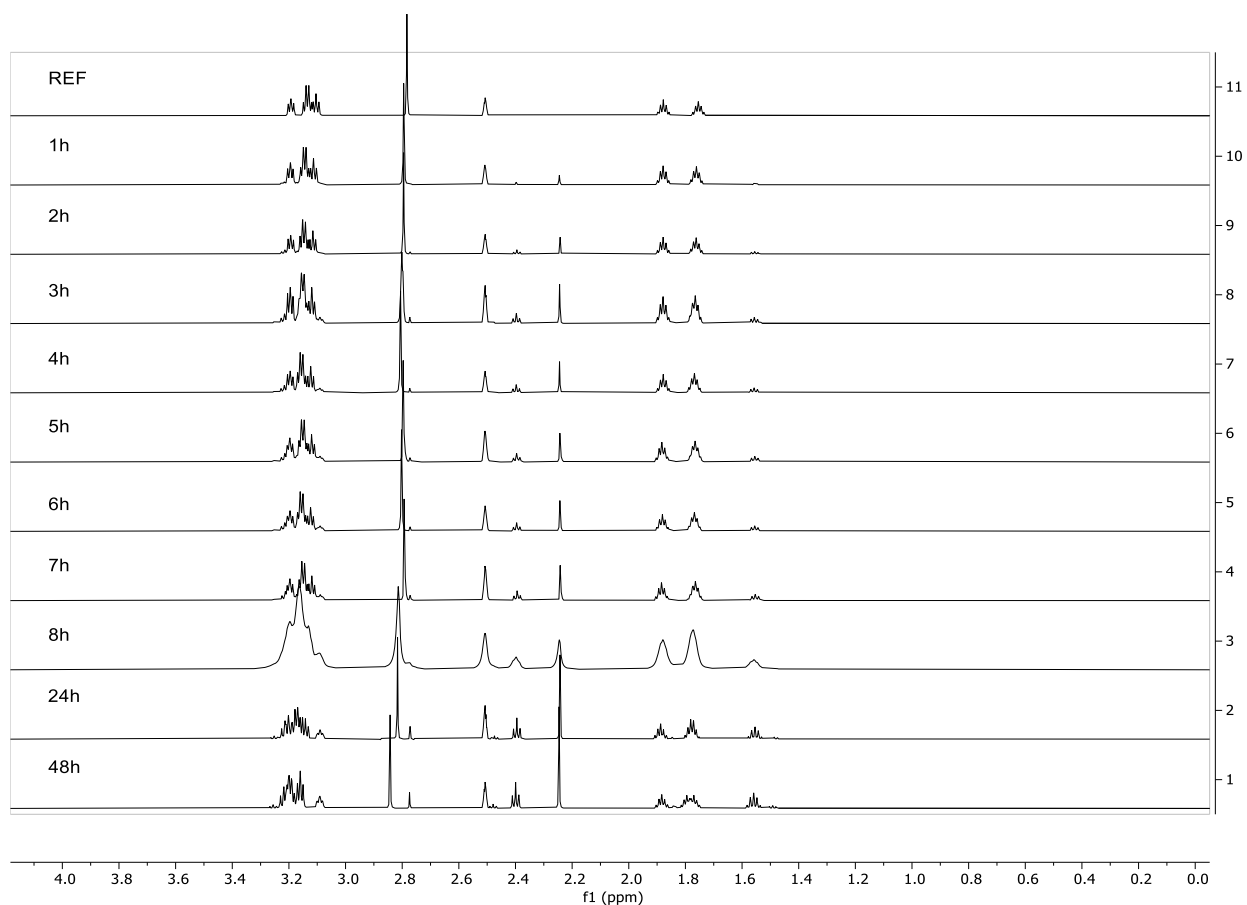

Figure S23  $^1\text{H}$  NMR 1 molar equivalent of mTBD, 1 molar equivalent of water and 2 molar equivalents of phenol.

*g.* mTBD + water + propanol

| Structure                                                                                   | Time | Integral N-Methyl | Integral HP1 | Integral HP2 | % HP  |
|---------------------------------------------------------------------------------------------|------|-------------------|--------------|--------------|-------|
| 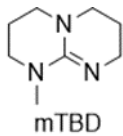<br>mTBD | REF  | 85430900.00       | 345940.00    | 928759.00    | 0.00  |
|                                                                                             | 1h   | 75234200.00       | 13658100.00  | 10582000.00  | 24.37 |
|                                                                                             | 2h   | 66749700.00       | 18781300.00  | 11203600.00  | 31.00 |
|                                                                                             | 3h   | 64640700.00       | 25419700.00  | 12797000.00  | 37.16 |
|                                                                                             | 4h   | 43215600.00       | 21255300.00  | 9688740.00   | 41.73 |
|                                                                                             | 5h   | 51570500.00       | 28968600.00  | 12956600.00  | 44.84 |
|                                                                                             | 6h   | 45160700.00       | 34225000.00  | 13476800.00  | 51.37 |
|                                                                                             | 7h   | 43364200.00       | 35787200.00  | 14332100.00  | 53.61 |
|                                                                                             | 8h   | 37033400.00       | 33215200.00  | 12827900.00  | 55.42 |
|                                                                                             | 24h  | 26768200.00       | 45067300.00  | 16283800.00  | 69.62 |
|                                                                                             | 48h  | 18241900.00       | 53787100.00  | 18602300.00  | 79.87 |

Table S24 1 molar equivalent of mTBD, 1 molar equivalent of water and 0.2 molar equivalent of propanol.



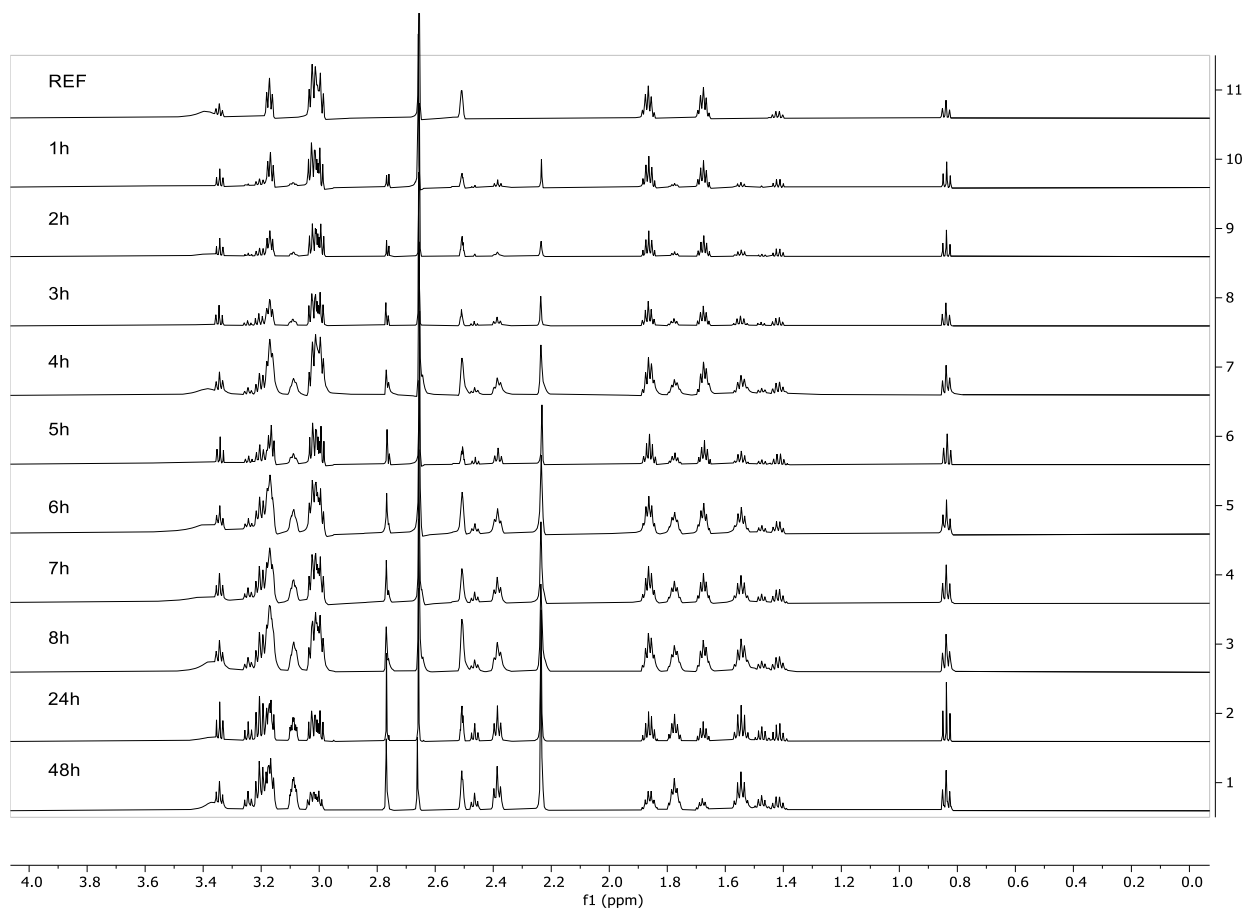

Figure S24  $^1\text{H}$  NMR 1 molar equivalent of mTBD, 1 molar equivalent of water and 0.2 molar equivalent of propanol.

| Structure                                                                                   | Time | Integral N-Methyl | Integral HP1 | integral HP2 | % HP  |
|---------------------------------------------------------------------------------------------|------|-------------------|--------------|--------------|-------|
| 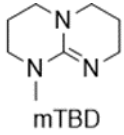<br>mTBD | REF  | 86001600.00       | 307232.00    | 1113340.00   | 1.62  |
|                                                                                             | 1h   | 57181800.00       | 12656400.00  | 8135950.00   | 26.67 |
|                                                                                             | 2h   | 57651600.00       | 19631500.00  | 10139100.00  | 34.05 |
|                                                                                             | 3h   | 49275700.00       | 22488300.00  | 10259800.00  | 39.93 |
|                                                                                             | 4h   | 40196800.00       | 22559100.00  | 9712630.00   | 44.53 |
|                                                                                             | 5h   | 40156900.00       | 25810900.00  | 10744100.00  | 47.65 |
|                                                                                             | 6h   | 41106700.00       | 34907100.00  | 13508000.00  | 54.08 |
|                                                                                             | 7h   | 36083500.00       | 33025500.00  | 12507300.00  | 55.79 |
|                                                                                             | 8h   | 27963600.00       | 27425500.00  | 10311800.00  | 57.44 |
|                                                                                             | 24h  | 24647000.00       | 47484100.00  | 16773200.00  | 72.28 |
|                                                                                             | 48h  | 17188300.00       | 57324600.00  | 19882300.00  | 81.79 |

Table S25 1 molar equivalent of mTBD, 1 molar equivalent of water and 0.5 molar equivalent of propanol.

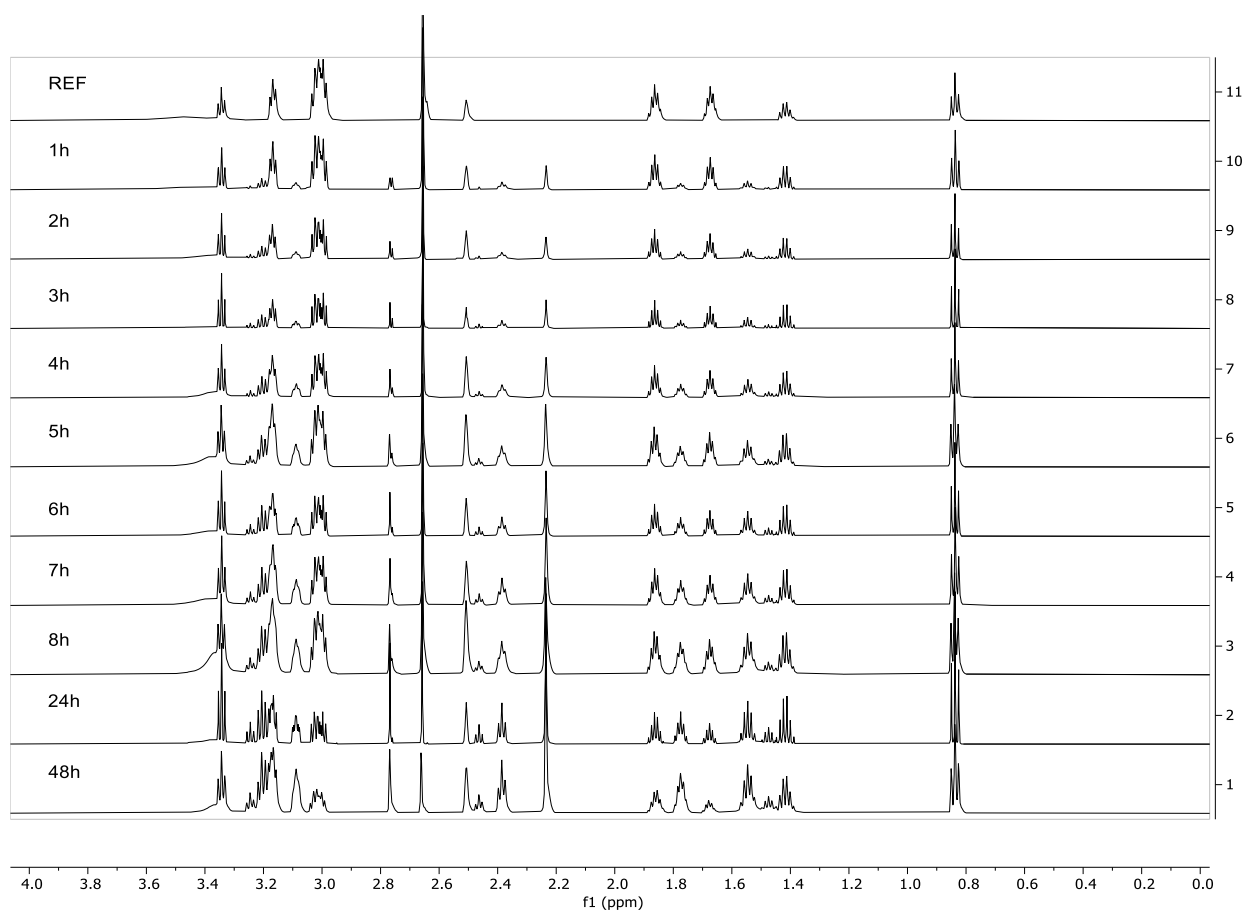

Figure S25 <sup>1</sup>H NMR 1 molar equivalent of mTBD, 1 molar equivalent of water and 0.5 molar equivalent of propanol.

| Structure                                                                                   | Time | integral N-Methyl | integral HP1 | integral HP2 | % HP  |
|---------------------------------------------------------------------------------------------|------|-------------------|--------------|--------------|-------|
| 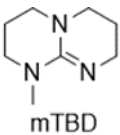<br>mTBD | REF  | 66660100.00       | 820591.00    | 1088040.00   | 2.78  |
|                                                                                             | 1h   | 41485800.00       | 11356400.00  | 5621920.00   | 29.04 |
|                                                                                             | 2h   | 40938700.00       | 16390600.00  | 6873700.00   | 36.24 |
|                                                                                             | 3h   | 44516900.00       | 23715500.00  | 8943150.00   | 42.32 |
|                                                                                             | 4h   | 29320000.00       | 18807400.00  | 6682380.00   | 46.51 |
|                                                                                             | 5h   | 36031200.00       | 26451700.00  | 9210580.00   | 49.74 |
|                                                                                             | 6h   | 31819100.00       | 31090000.00  | 10147300.00  | 56.45 |
|                                                                                             | 7h   | 27842900.00       | 29445800.00  | 9441930.00   | 58.28 |
|                                                                                             | 8h   | 24725300.00       | 28236500.00  | 8955950.00   | 60.07 |
|                                                                                             | 24h  | 13948200.00       | 31545300.00  | 9570610.00   | 74.67 |
|                                                                                             | 48h  | 11717300.00       | 47344500.00  | 14151900.00  | 84.00 |

Table S26 1 molar equivalent of mTBD, 1 molar equivalent of water and 1 molar equivalent of propanol.

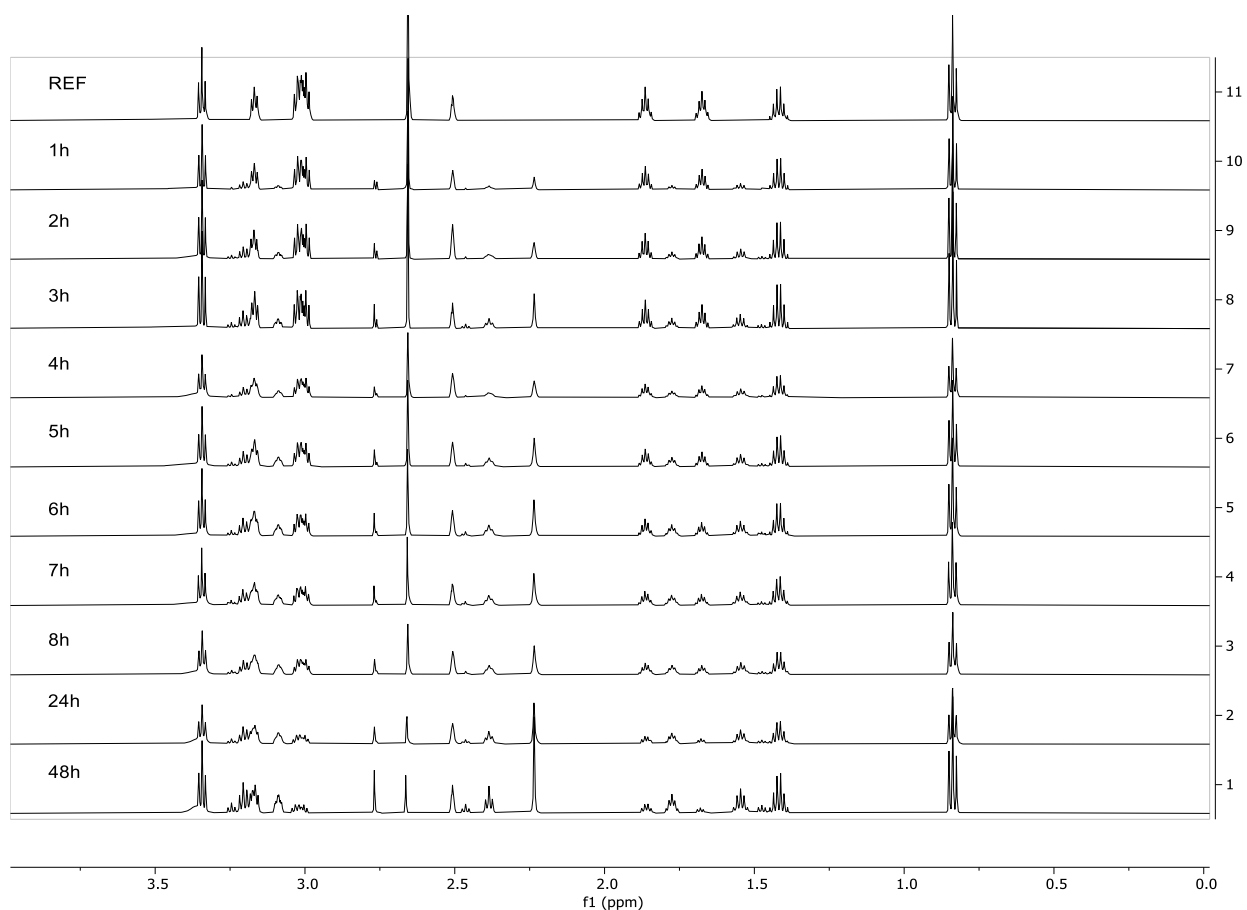

Figure S26  $^1\text{H}$  NMR 1 molar equivalent of mTBD, 1 molar equivalent of water and 1 molar equivalent of propanol.

| Structure                                                                                   | Time | integral N-Methyl | integral HP1 | integral HP2 | % HP  |
|---------------------------------------------------------------------------------------------|------|-------------------|--------------|--------------|-------|
| 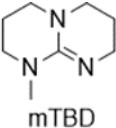<br>mTBD | REF  | 56121500.00       | 655175.00    | 957258.00    | 0.00  |
|                                                                                             | 1h   | 33384200.00       | 7904250.00   | 3572780.00   | 25.58 |
|                                                                                             | 2h   | 32237100.00       | 11805600.00  | 4369280.00   | 33.41 |
|                                                                                             | 3h   | 34728400.00       | 16739200.00  | 5533000.00   | 39.07 |
|                                                                                             | 4h   | 26083500.00       | 15180900.00  | 4669490.00   | 43.22 |
|                                                                                             | 5h   | 27768100.00       | 18869500.00  | 5505380.00   | 46.75 |
|                                                                                             | 6h   | 28416500.00       | 24874000.00  | 7001100.00   | 52.87 |
|                                                                                             | 7h   | 19481100.00       | 18217900.00  | 5130560.00   | 54.51 |
|                                                                                             | 8h   | 23219900.00       | 23718000.00  | 6531270.00   | 56.57 |
|                                                                                             | 24h  | 13991600.00       | 28370400.00  | 7420820.00   | 71.89 |
|                                                                                             | 48h  | 9913060.00        | 35329400.00  | 9125150.00   | 81.77 |

Table S27 1 molar equivalent of mTBD, 1 molar equivalent of water and 2 molar equivalents of propanol.

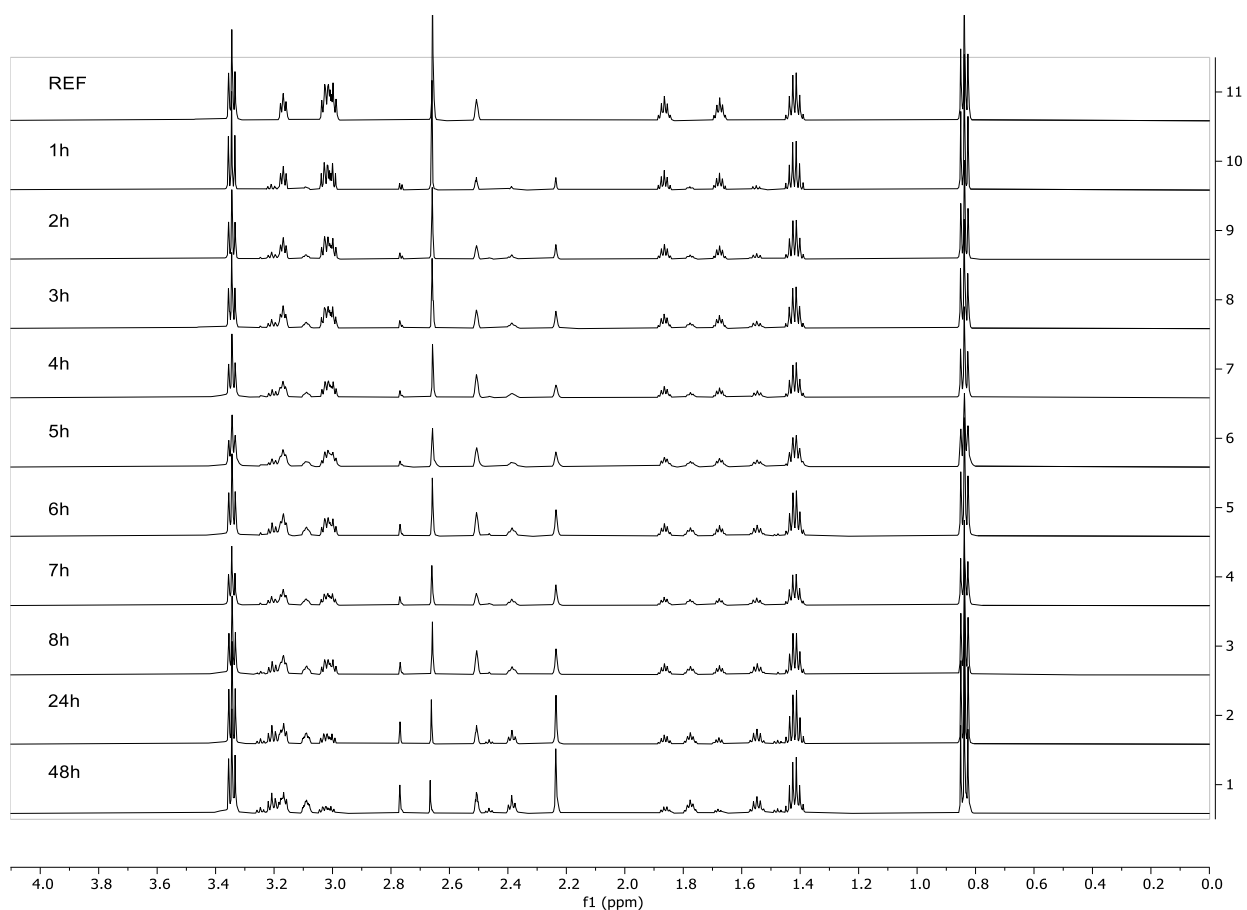

Figure S27  $^1\text{H}$  NMR 1 molar equivalent of *m*TBD, 1 molar equivalent of water and 2 molar equivalents of propanol.

2. [mTBDH][OAc]

a. [mTBDH][OAc] + water

| Structure | Time | Integral N-Methyl | Integral HP | % HP  |
|-----------|------|-------------------|-------------|-------|
|           | REF  | 267107000.00      | 0           | 0     |
|           | 1h   | 300036000.00      | 538829.00   | 0.18  |
|           | 2h   | 292056000.00      | 944885.00   | 0.32  |
|           | 3h   | 224731000.00      | 1204880.00  | 0.53  |
|           | 4h   | 163100000.00      | 1884370.00  | 1.14  |
|           | 5h   | 329514000.00      | 5089200.00  | 1.52  |
|           | 6h   | 324379000.00      | 6050250.00  | 1.83  |
|           | 24h  | 262844000.00      | 17984900.00 | 6.40  |
|           | 48h  | 249919000.00      | 32026600.00 | 11.36 |

Table S28 1 molar equivalent of [mTBDH][OAc] and 0.2 molar equivalent of water.

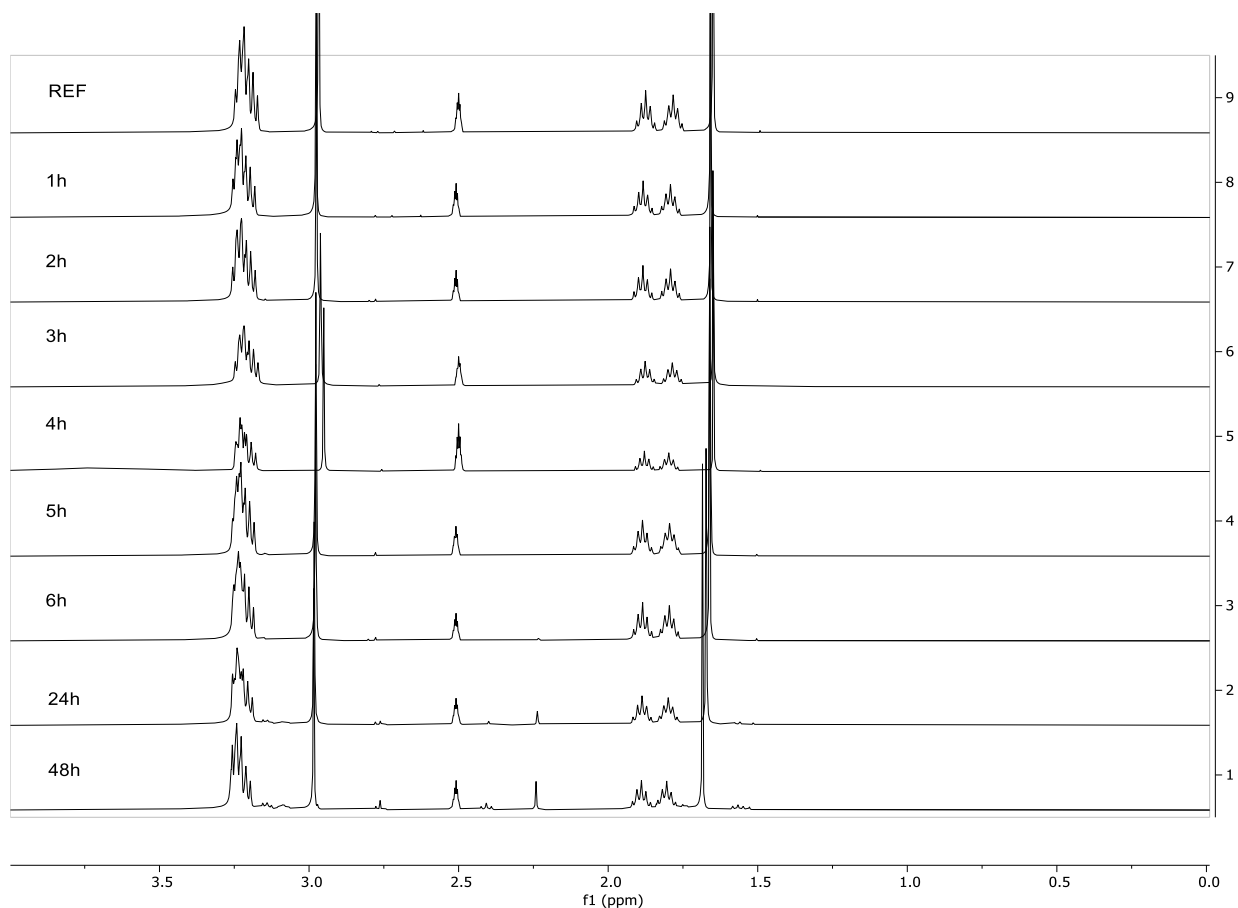

Figure S28  $^1\text{H}$  NMR 1 molar equivalent of  $[\text{mTBDH}][\text{OAc}]$  and 0.2 molar equivalent of water.

| Structure | Time | Integral N-Methyl | Integral HP | % HP  |
|-----------|------|-------------------|-------------|-------|
|           | REF  | 241928000.00      | 0           | 0     |
|           | 1h   | 214254000.00      | 2250800.00  | 1.04  |
|           | 2h   | 220199000.00      | 3792760.00  | 1.69  |
|           | 3h   | 239860000.00      | 6787920.00  | 2.75  |
|           | 4h   | 209905000.00      | 6788960.00  | 3.13  |
|           | 5h   | 227671000.00      | 7792920.00  | 3.31  |
|           | 6h   | 206568000.00      | 9347610.00  | 4.33  |
|           | 24h  | 216168000.00      | 29663800.00 | 12.07 |
|           | 48h  | 162434000.00      | 42091600.00 | 20.58 |

Table S29 1 molar equivalent of  $[\text{mTBDH}][\text{OAc}]$  and 0.5 molar equivalent of water.

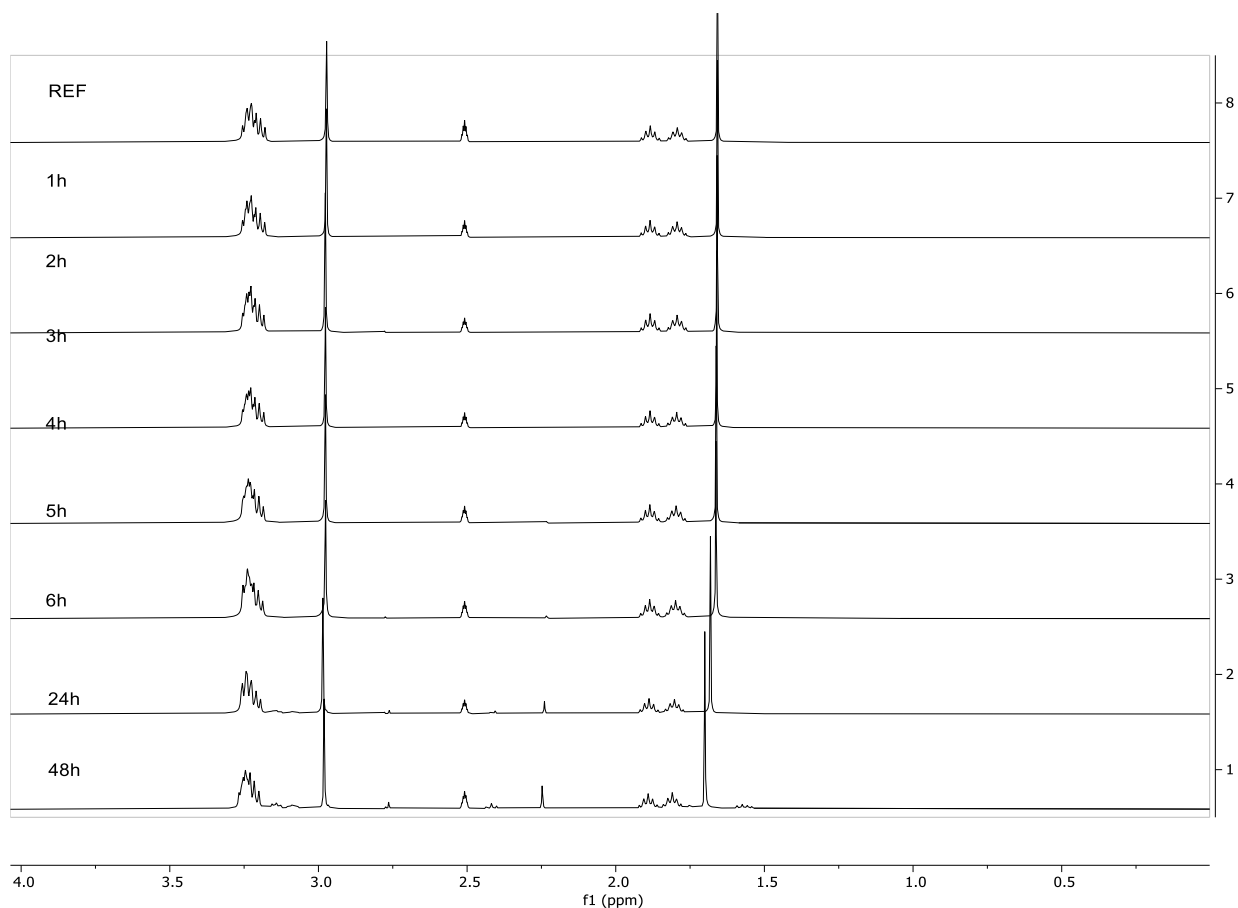

Figure S29  $^1\text{H}$  NMR 1 molar equivalent of  $[\text{mTBDH}][\text{OAc}]$  and 0.5 molar equivalent of water.

| Structure | Time | Integral N-Methyl | Integral HP1 | integral HP2 | % HP  |
|-----------|------|-------------------|--------------|--------------|-------|
|           | REF  | 224537000.00      | 0            | 0            | 0     |
|           | 1h   | 224537000.00      | 512081.00    | 260546.00    | 0.34  |
|           | 2h   | 219879000.00      | 2027920.00   | 217956.00    | 1.01  |
|           | 3h   | 255048000.00      | 4052140.00   | 258076.00    | 1.66  |
|           | 4h   | 260185000.00      | 6068220.00   | 353416.00    | 2.40  |
|           | 5h   | 226600000.00      | 6094730.00   | 415538.00    | 2.79  |
|           | 6h   | 223087000.00      | 7403650.00   | 496243.00    | 3.42  |
|           | 24h  | 183778000.00      | 23603700.00  | 3460300.00   | 12.83 |
|           | 48h  | 171300000.00      | 37440400.00  | 6313070.00   | 20.34 |

Table S30 1 molar equivalent of  $[\text{mTBDH}][\text{OAc}]$  and 1 molar equivalent of water.

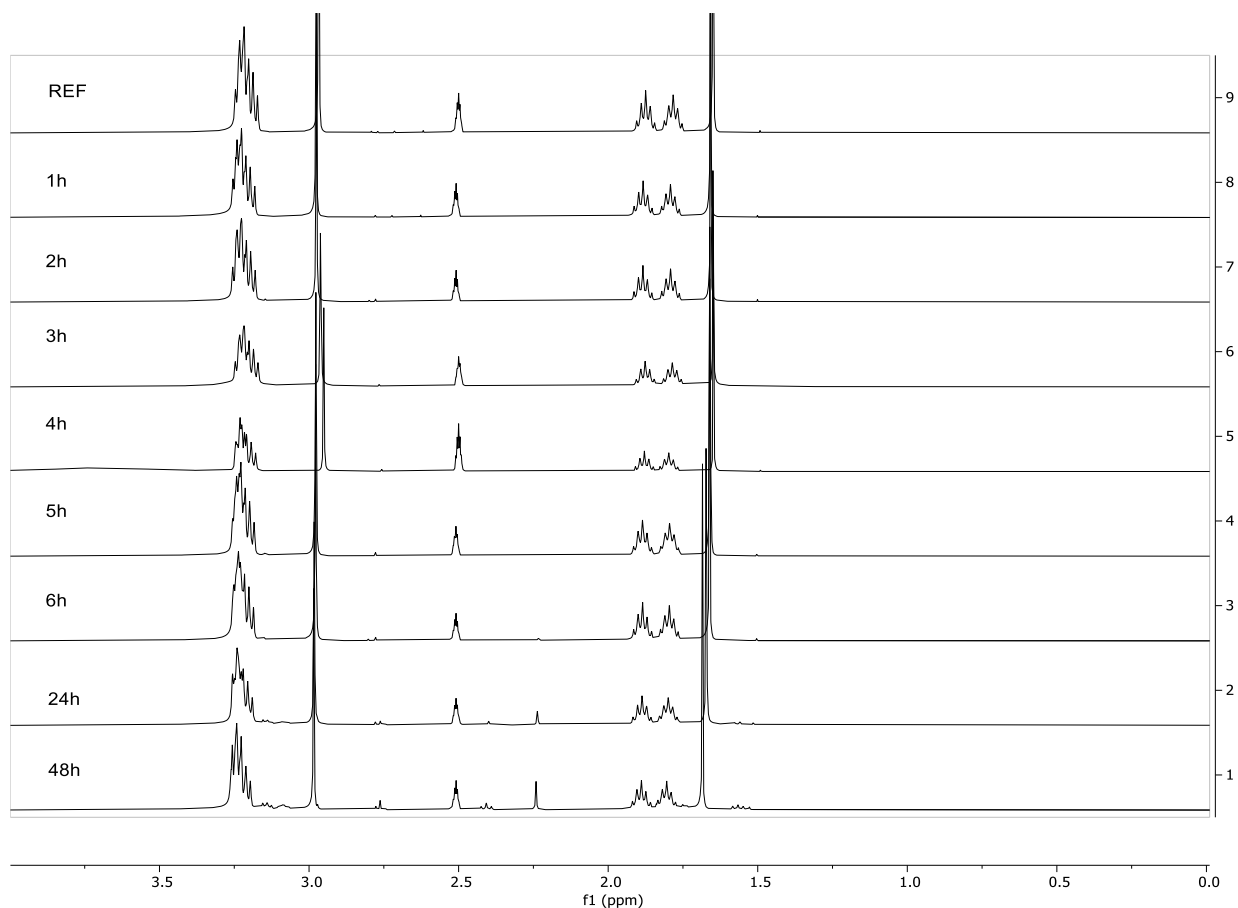

Figure S30  $^1\text{H}$  NMR 1 molar equivalent of  $m\text{TBDH}][\text{OAc}]$  and 1 molar equivalent of water.

| Structure | Time | Integral N-Methyl | Integral HP1 | integral HP2 | % HP  |
|-----------|------|-------------------|--------------|--------------|-------|
|           | REF  | 197403000.00      | 464191.00    | 0.00         | 0.00  |
|           | 1h   | 160249000.00      | 633598.00    | 0.00         | 0.39  |
|           | 2h   | 168145000.00      | 1346670.00   | 336467.00    | 0.99  |
|           | 3h   | 174234000.00      | 2022530.00   | 279829.00    | 1.30  |
|           | 4h   | 145676000.00      | 2008340.00   | 237912.00    | 1.52  |
|           | 5h   | 187417000.00      | 2747620.00   | 396449.00    | 1.65  |
|           | 7h   | 193657000.00      | 4038730.00   | 441784.00    | 2.26  |
|           | 24h  | 161754000.00      | 9941460.00   | 1364280.00   | 6.53  |
|           | 48h  | 162492000.00      | 17148400.00  | 2450590.00   | 10.76 |

Table S31 1 molar equivalent of  $[m\text{TBDH}][\text{OAc}]$  and 5 molar equivalents of water.

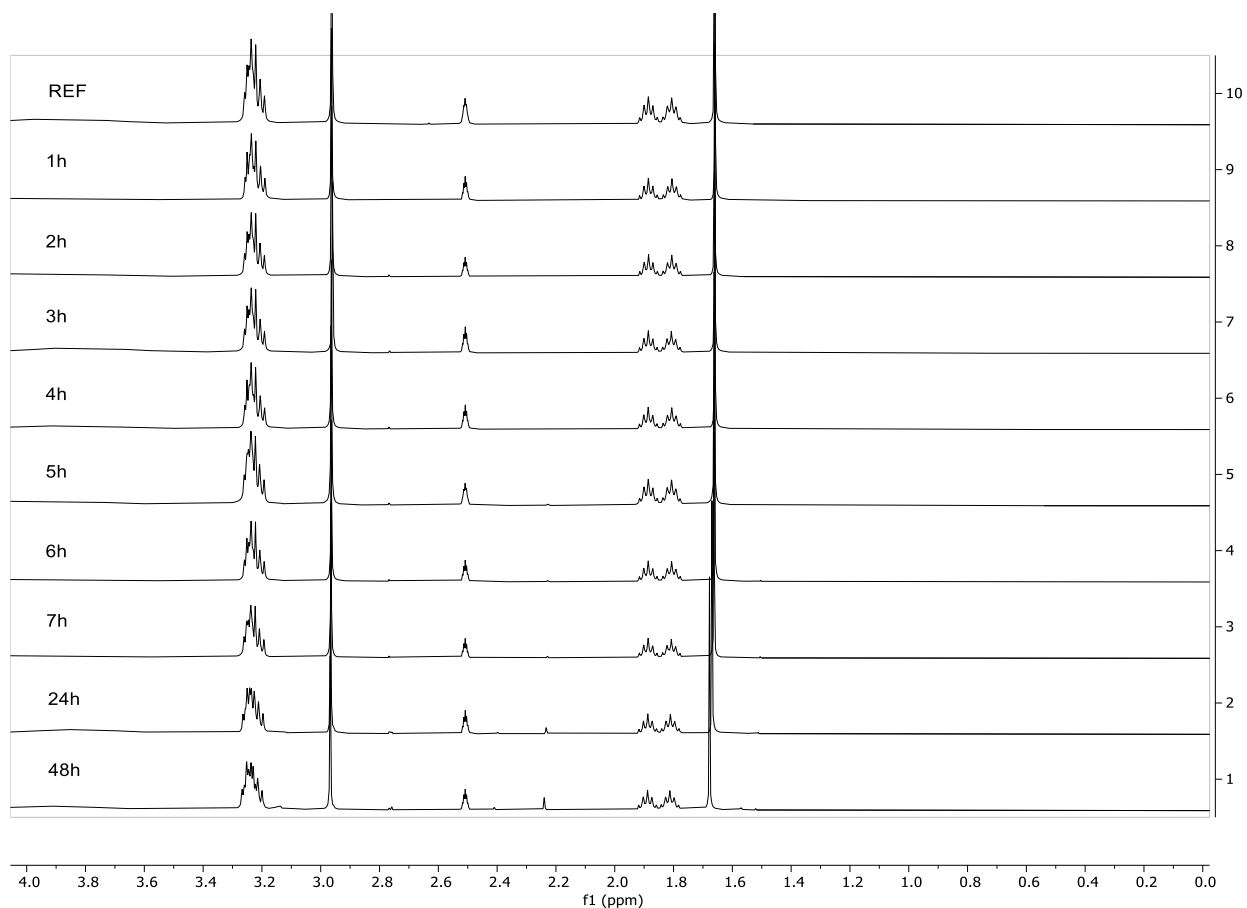

Figure S31  $^1\text{H}$  NMR 1 molar equivalent of  $[\text{mTBDH}][\text{OAc}]$  and 5 molar equivalents of water.

| Structure | Time | Integral N-Methyl | Integral HP | % HP |
|-----------|------|-------------------|-------------|------|
|           | REF  | 113686000.00      | 279413.00   | 0    |
|           | 1h   | 128149000.00      | 376667.00   | 0.29 |
|           | 2h   | 135585000.00      | 552584.00   | 0.41 |
|           | 3h   | 160454000.00      | 784448.00   | 0.49 |
|           | 4h   | 137643000.00      | 928327.00   | 0.67 |
|           | 5h   | 146880000.00      | 994372.00   | 0.67 |
|           | 6h   | 150129000.00      | 1203190.00  | 0.80 |
|           | 7h   | 163902000.00      | 1939600.00  | 1.17 |
|           | 24h  | 137901000.00      | 6795400.00  | 4.70 |
|           | 48h  | 152243000.00      | 7097530.00  | 4.45 |

Table S32 1 molar equivalent of  $[\text{mTBDH}][\text{OAc}]$  and 10 molar equivalents of water.



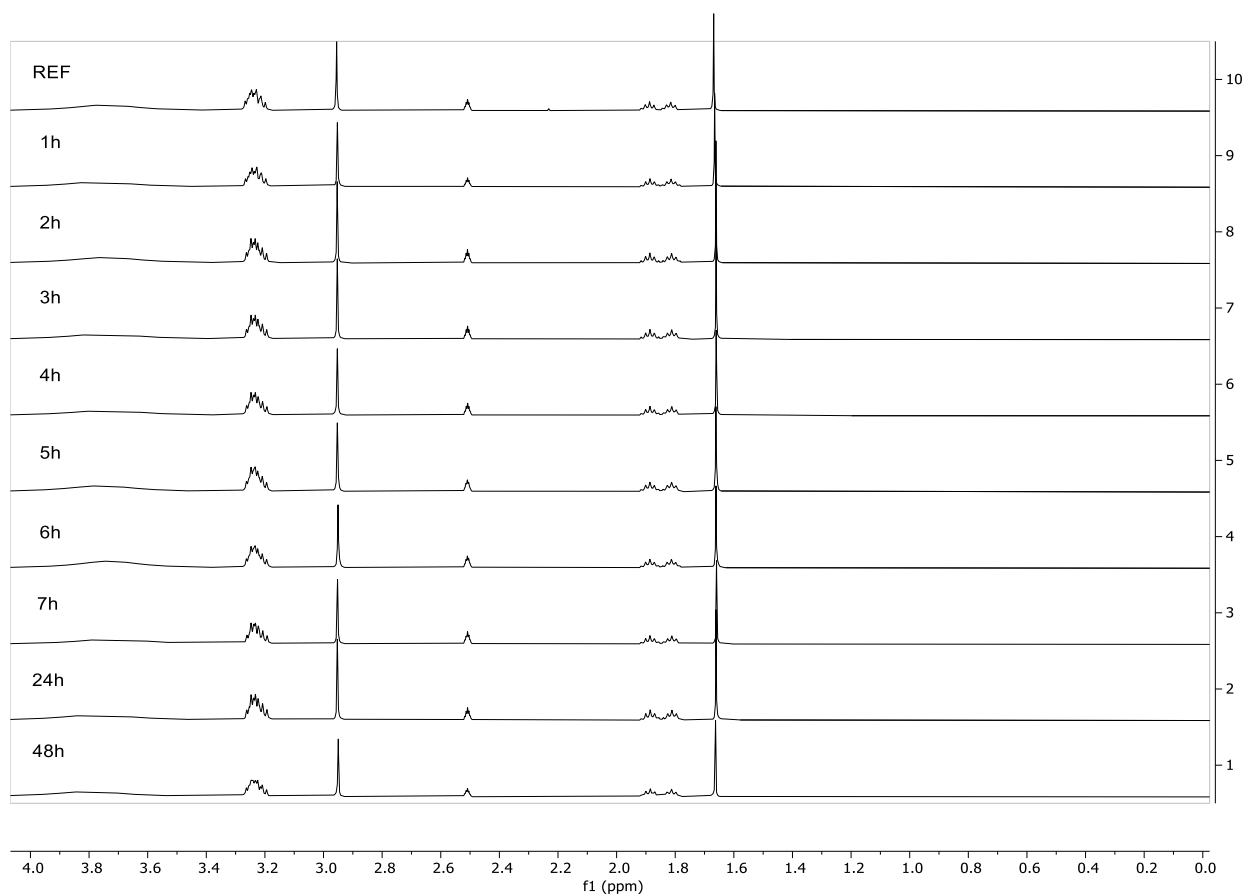

Figure S32  $^1\text{H}$  NMR molar equivalent of  $[\text{mTBDH}][\text{OAc}]$  and 10 molar equivalents of water.

b.  $[\text{mTBDH}][\text{OAc}] + \text{water} + \text{DMSO}$

| Structure | Time | Integral N-Methyl | Integral HP1 | Integral HP2 | % HP  |
|-----------|------|-------------------|--------------|--------------|-------|
|           | REF  | 78371600.00       | 243088.00    | 703550.00    | 0     |
|           | 1h   | 83511900.00       | 98416.60     | 265601.00    | 0.43  |
|           | 2h   | 88478200.00       | 444580.00    | 260308.00    | 0.79  |
|           | 3h   | 63505200.00       | 556307.00    | 34901.20     | 0.92  |
|           | 4h   | 94270700.00       | 832201.00    | 332312.00    | 1.22  |
|           | 5h   | 73173300.00       | 1193900.00   | 143321.00    | 1.79  |
|           | 6h   | 73144100.00       | 2261940.00   | 573641.00    | 3.73  |
|           | 7h   | 66777400.00       | 2547550.00   | 716724.00    | 4.66  |
|           | 8h   | 81239800.00       | 3153940.00   | 1076300.00   | 4.94  |
|           | 24h  | 56388900.00       | 6293810.00   | 1448840.00   | 12.07 |
|           | 48h  | 67374100.00       | 12472100.00  | 2964220.00   | 18.64 |

Table S33 1 molar equivalent of  $[\text{mTBDH}][\text{OAc}]$ , 1 molar equivalent of water and 0.2 equivalent of DMSO.

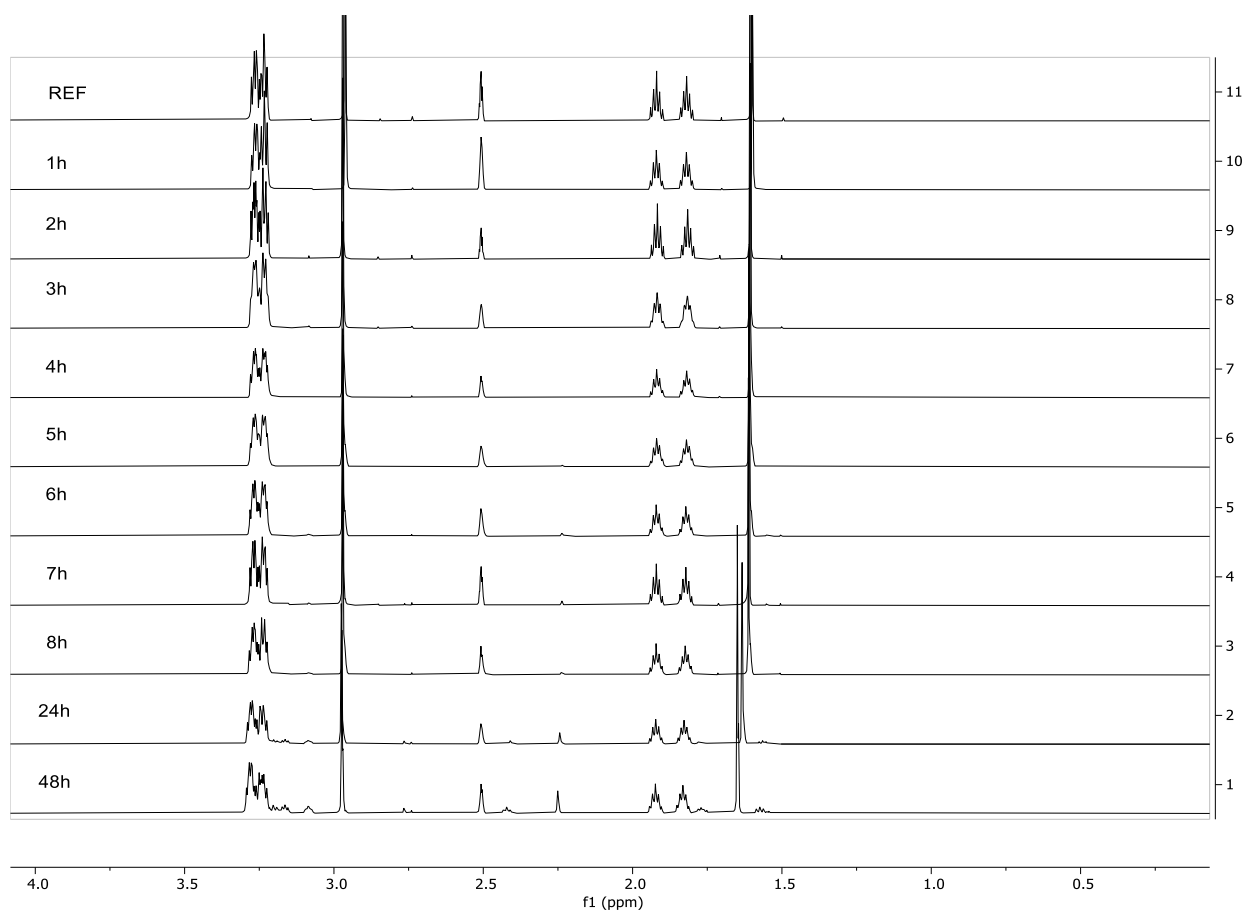

Figure S33  $^1\text{H}$  NMR 1 molar equivalent of  $[\text{mTBDH}][\text{OAc}]$ , 1 molar equivalent of water and 0.2 equivalent of DMSO.

| Structure | Time | integral N-Methyl | integral HP1 | integral HP2 | % HP  |
|-----------|------|-------------------|--------------|--------------|-------|
|           | REF  | 80329200.00       | 9353.72      | 0.00         | 0.00  |
|           | 1h   | 79329100.00       | 46900.60     | 87319.30     | 0.17  |
|           | 2h   | 74831900.00       | 939780.00    | 118091.00    | 1.39  |
|           | 3h   | 107013000.00      | 1403360.00   | 1164000.00   | 2.34  |
|           | 4h   | 78254700.00       | 1700260.00   | 313737.00    | 2.51  |
|           | 5h   | 75940500.00       | 1067510.00   | 965735.00    | 2.61  |
|           | 6h   | 83477000.00       | 2105260.00   | 558440.00    | 3.09  |
|           | 7h   | 74752700.00       | 2254390.00   | 479391.00    | 3.53  |
|           | 8h   | 72930800.00       | 2266790.00   | 935072.00    | 4.21  |
|           | 24h  | 64866100.00       | 6133640.00   | 1493080.00   | 10.52 |
|           | 48h  | 49839500.00       | 7984200.00   | 1850410.00   | 16.48 |

Table S34 1 molar equivalent of  $[\text{mTBDH}][\text{OAc}]$ , 1 molar equivalent of water and 0.5 equivalent of DMSO.

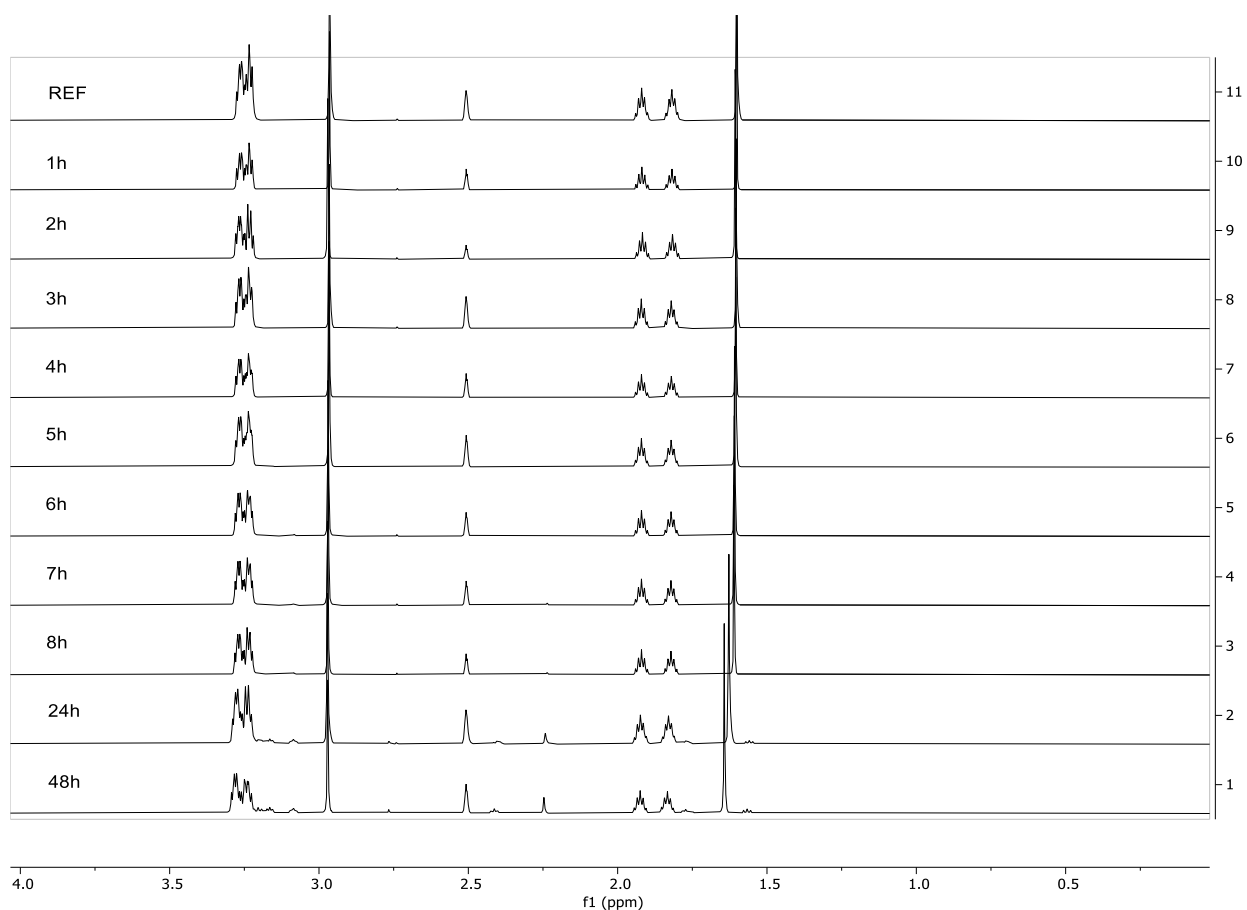

Figure S34  $^1\text{H}$  NMR 1 molar equivalent of  $[\text{mTBDH}][\text{OAc}]$ , 1 molar equivalent of water and 0.5 equivalent of DMSO.

| Structure | Time | Integral N-Methyl | Integral HP1 | Integral HP2 | % HP  |
|-----------|------|-------------------|--------------|--------------|-------|
|           | REF  | 58154100.00       | 0.00         | 0.00         | 0.00  |
|           | 1h   | 70220100.00       | 42502.40     | 109167.00    | 0.22  |
|           | 2h   | 74917700.00       | 156862.00    | 181328.00    | 0.45  |
|           | 3h   | 69300700.00       | 598713.00    | 398560.00    | 1.42  |
|           | 4h   | 85425800.00       | 764573.00    | 725572.00    | 1.71  |
|           | 5h   | 67493900.00       | 939376.00    | 578338.00    | 2.20  |
|           | 6h   | 72697600.00       | 1311680.00   | 493552.00    | 2.42  |
|           | 7h   | 67118100.00       | 1503420.00   | 652837.00    | 3.11  |
|           | 8h   | 76323500.00       | 1788930.00   | 780287.00    | 3.26  |
|           | 24h  | 64426300.00       | 5217720.00   | 1267270.00   | 9.15  |
|           | 48h  | 57848300.00       | 7977170.00   | 1803450.00   | 14.46 |

Table S35 1 molar equivalent of  $[\text{mTBDH}][\text{OAc}]$ , 1 molar equivalent of water and 1 equivalent of DMSO.

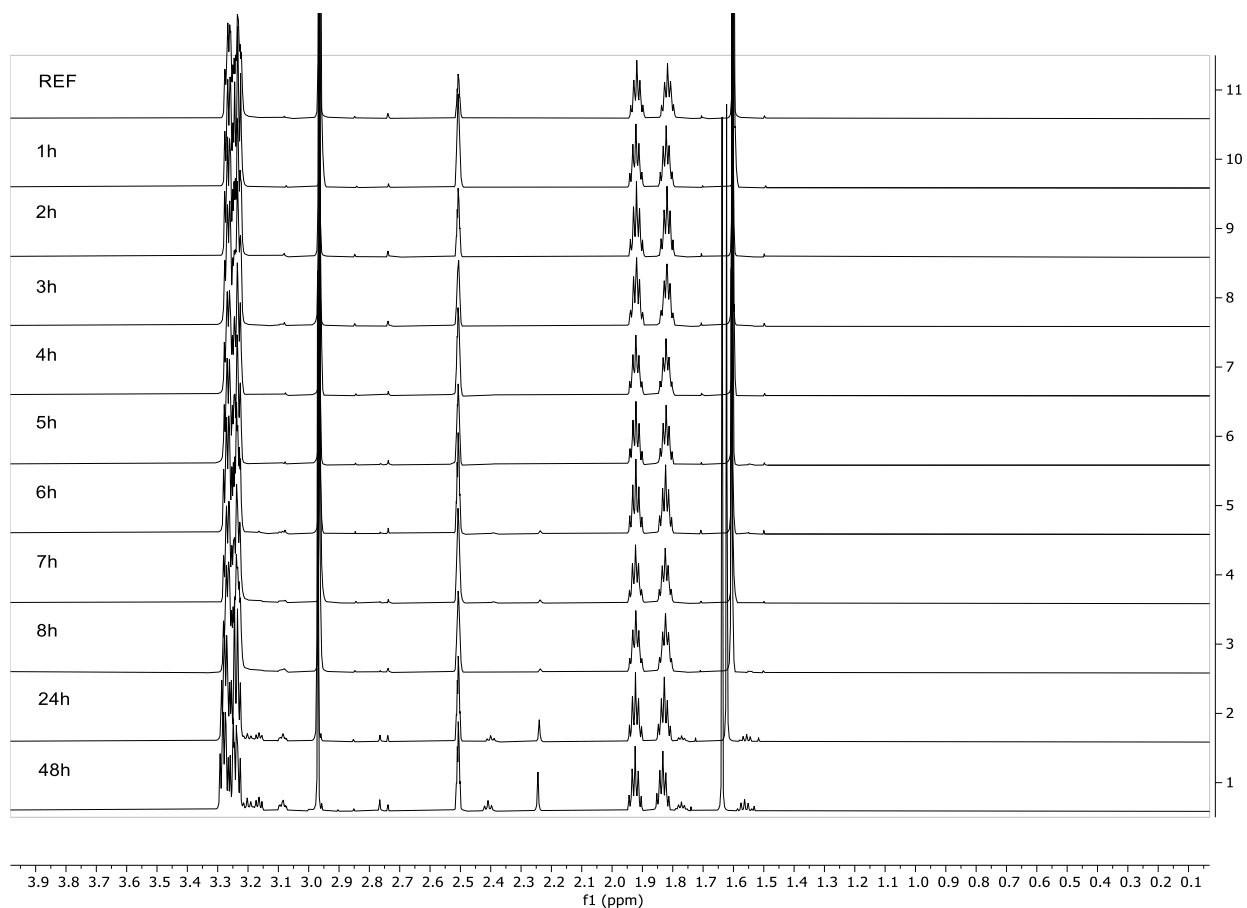

Figure S35  $^1\text{H}$  NMR 1 molar equivalent of  $[\text{mTBDH}][\text{OAc}]$ , 1 molar equivalent of water and 1 equivalent of DMSO.

| Structure | Time | integral N-Methyl | integral HP1 | integral HP2 | % HP  |
|-----------|------|-------------------|--------------|--------------|-------|
|           | REF  | 64361600.00       | 82381.20     | 395302.00    | 0.00  |
|           | 1h   | 72074400.00       | 445992.00    | 89685.50     | 0.74  |
|           | 2h   | 48786200.00       | 144237.00    | 258007.00    | 0.82  |
|           | 3h   | 74984900.00       | 348075.00    | 408524.00    | 1.00  |
|           | 4h   | 74950100.00       | 710143.00    | 376640.00    | 1.43  |
|           | 5h   | 59758400.00       | 840972.00    | 545333.00    | 2.27  |
|           | 6h   | 61935600.00       | 1138070.00   | 595007.00    | 2.72  |
|           | 7h   | 67214700.00       | 1494540.00   | 718712.00    | 3.19  |
|           | 8h   | 75414300.00       | 1801040.00   | 851461.00    | 3.40  |
|           | 24h  | 63763200.00       | 4733060.00   | 1336410.00   | 8.69  |
|           | 48h  | 50749200.00       | 6393490.00   | 1664020.00   | 13.70 |

Table S36 1 molar equivalent of  $[\text{mTBDH}][\text{OAc}]$ , 1 molar equivalent of water and 1 equivalent of DMSO.

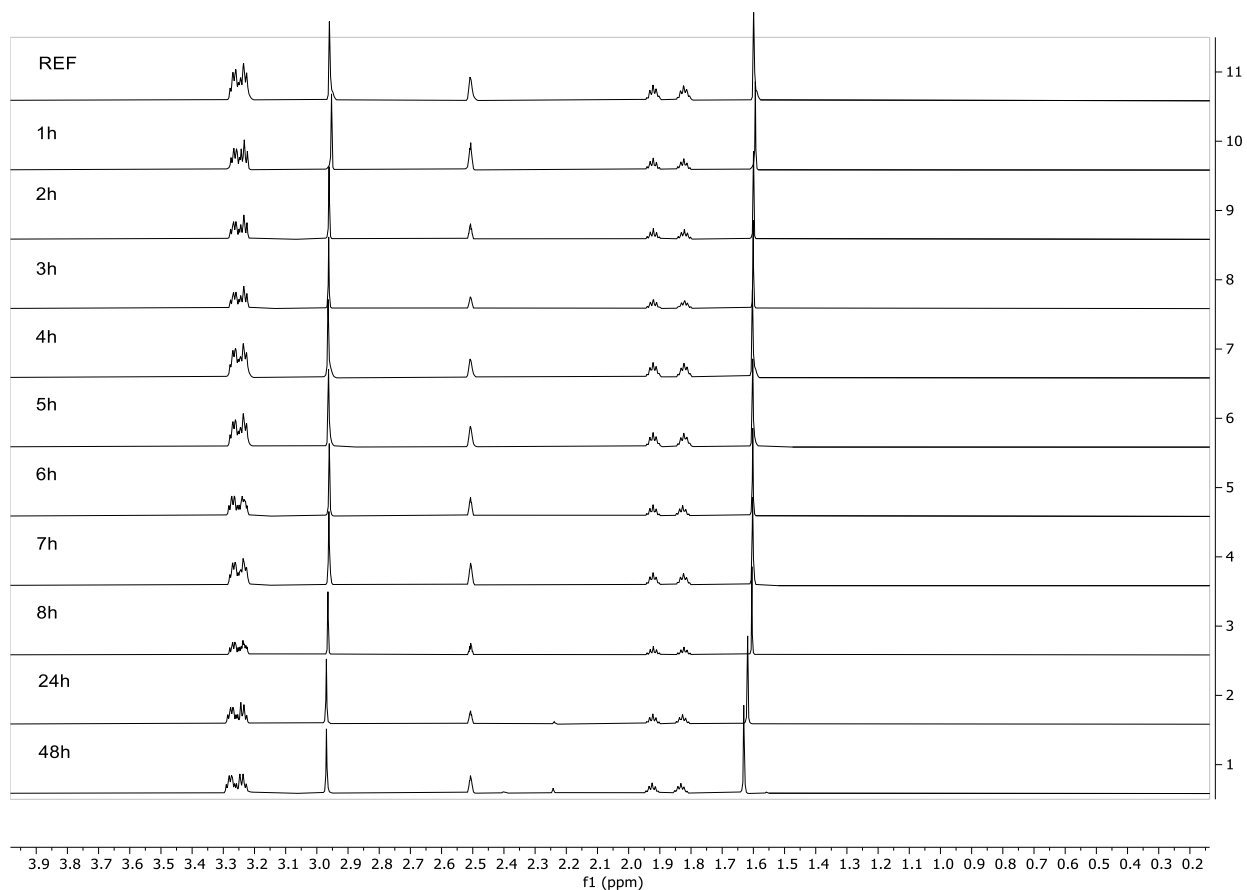

Figure S36  $^1\text{H}$  NMR 1 molar equivalent of  $[\text{mTBDH}][\text{OAc}]$ , 1 molar equivalent of water and 1 equivalent of DMSO.

c.  $[\text{mTBDH}][\text{OAc}] + \text{water} + \text{ethylene glycol}$

| Structure | Time | Integral N-Methyl | Integral HP1 | Integral HP2 | % HP  |
|-----------|------|-------------------|--------------|--------------|-------|
|           | REF  | 111760000.00      | 548617.00    | 511257.00    | 0.00  |
|           | 1h   | 115907000.00      | 826142.00    | 608174.00    | 1.22  |
|           | 2h   | 93735400.00       | 1146900.00   | 538388.00    | 1.77  |
|           | 3h   | 91353500.00       | 1275990.00   | 590450.00    | 2.00  |
|           | 4h   | 116948000.00      | 2102800.00   | 651254.00    | 2.30  |
|           | 5h   | 88299000.00       | 1831990.00   | 520049.00    | 2.59  |
|           | 6h   | 108851000.00      | 2606220.00   | 659531.00    | 2.91  |
|           | 7h   | 159277000.00      | 3934360.00   | 962008.00    | 2.98  |
|           | 8h   | 124557000.00      | 3597230.00   | 1060010.00   | 3.60  |
|           | 24h  | 91952400.00       | 9186860.00   | 1797670.00   | 10.67 |
|           | 48   | 87087900.00       | 11648200.00  | 2474910.00   | 13.95 |

Table S37 1 molar equivalent of  $[\text{mTBDH}][\text{OAc}]$ , 1 molar equivalent of water and 0.2 equivalent of ethylene glycol.

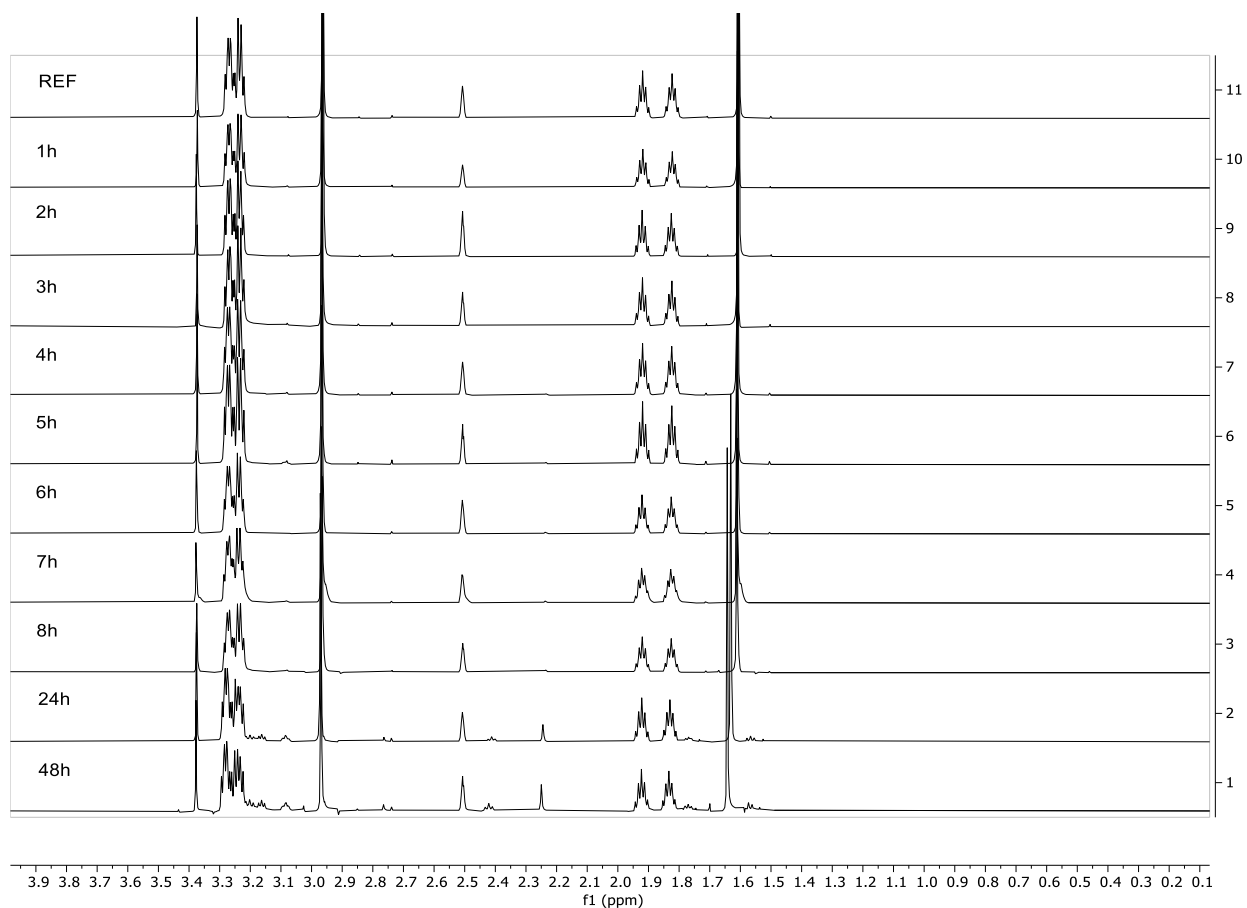

Figure S37  $^1\text{H}$  NMR 1 molar equivalent of  $[\text{mTBDH}][\text{OAc}]$ , 1 molar equivalent of water and 0.2 equivalent of ethylene glycol.

| Structure | Time | Integral N-Methyl | Integral HP1 | % HP |
|-----------|------|-------------------|--------------|------|
|           | REF  | 70075900.00       | 0.00         | 0.00 |
|           | 1h   | 62777500.00       | 0.00         | 0.00 |
|           | 2h   | 58262300.00       | 34906.30     | 0.05 |
|           | 3h   | 58220100.00       | 87476.00     | 0.15 |
|           | 4h   | 68552800.00       | 335163.00    | 0.48 |
|           | 5h   | 51284400.00       | 622976.00    | 1.20 |
|           | 6h   | 75724100.00       | 937438.00    | 1.22 |
|           | 7h   | 60709400.00       | 755779.00    | 1.22 |
|           | 8h   | 57140100.00       | 715548.00    | 1.23 |
|           | 24h  | 69178500.00       | 4388280.00   | 5.96 |
|           | 48h  | 49425400.00       | 5054170.00   | 9.27 |

Table S38 1 molar equivalent of  $[\text{mTBDH}][\text{OAc}]$ , 1 molar equivalent of water and 0.5 equivalent of ethylene glycol.

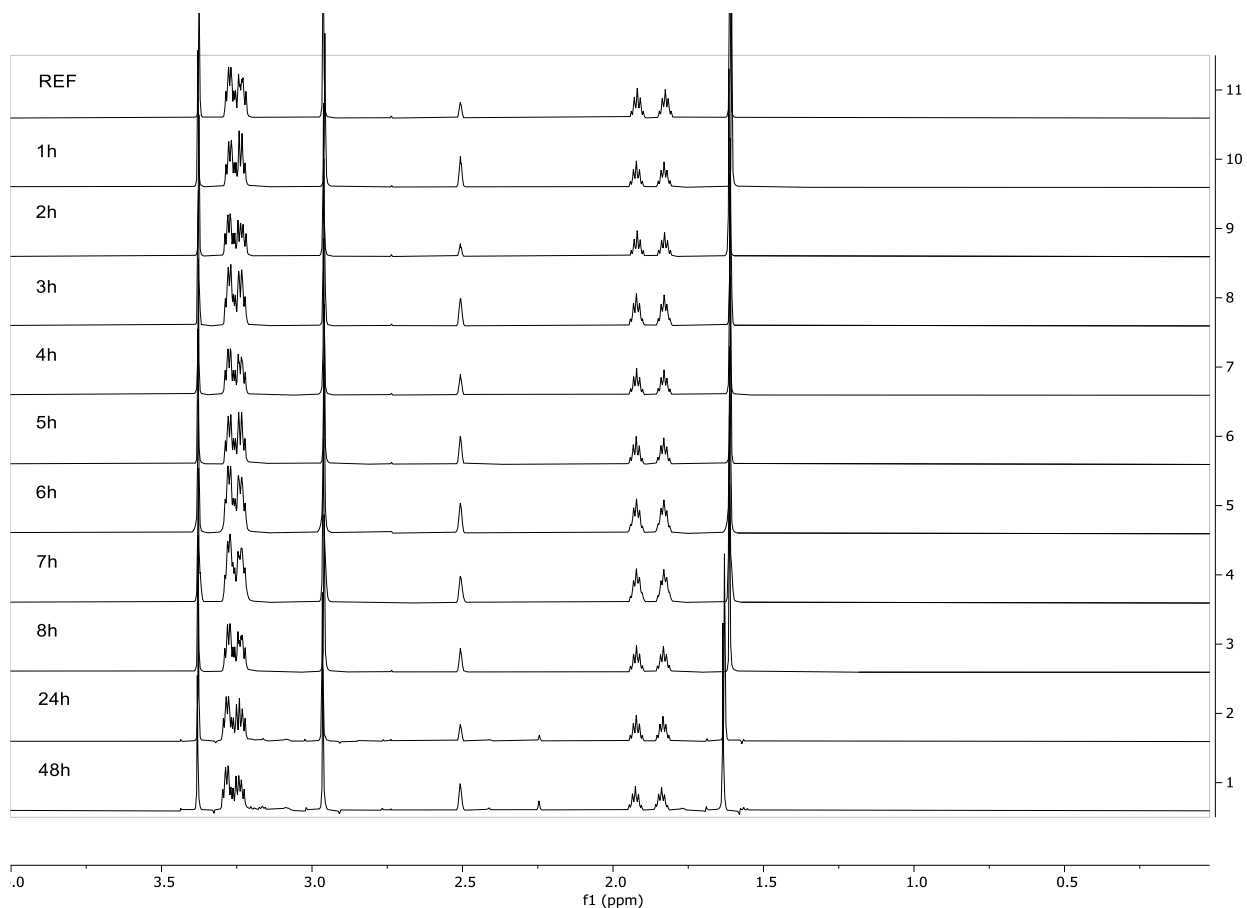

Figure S38 <sup>1</sup>H NMR 1 molar equivalent of [mTBDH][OAc], 1 molar equivalent of water and 0.5 equivalent of ethylene glycol.

| Structure | Time | Integral N-Methyl | Integral HP | Integral HP2 | % HP |
|-----------|------|-------------------|-------------|--------------|------|
|           | REF  | 58097600.00       | 0.00        | 0.00         | 0.00 |
|           | 1h   | 61083800.00       | 0.00        | 0.00         | 0.00 |
|           | 2h   | 56344700.00       | 0.00        | 0.00         | 0.00 |
|           | 3h   | 57140400.00       | 0.00        | 0.00         | 0.00 |
|           | 4h   | 51349400.00       | 0.00        | 0.00         | 0.00 |
|           | 5h   | 61728400.00       | 0.00        | 0.00         | 0.00 |
|           | 6h   | 63476800.00       | 4355.20     | 82240.80     | 0.14 |
|           | 7h   | 53287900.00       | 247305.00   | 150366.00    | 0.74 |
|           | 8h   | 57173700.00       | 268434.00   | 183873.00    | 0.78 |
|           | 24h  | 43917900.00       | 2011660.00  | 524529.00    | 5.46 |
|           | 48h  | 39934100.00       | 2966660.00  | 603222.00    | 8.21 |

Table S39 1 molar equivalent of [mTBDH][OAc], 1 molar equivalent of water and 1 equivalent of ethylene glycol.

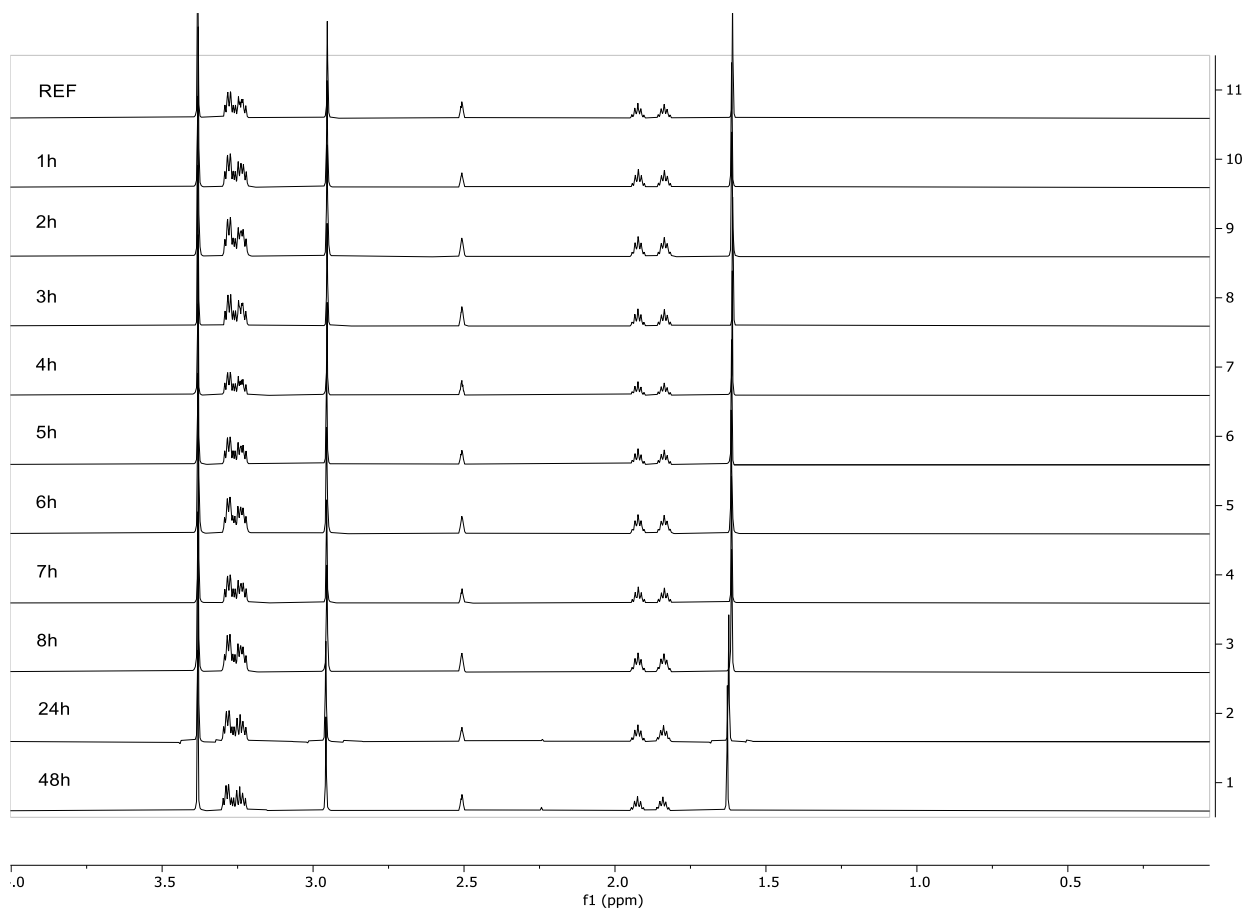

Figure S39  $^1\text{H}$  NMR 1 molar equivalent of  $[\text{mTBDH}][\text{OAc}]$ , 1 molar equivalent of water and 1 equivalent of ethylene glycol.

| Structure | Time | Integral N-Methyl | Integral HP | % HP |
|-----------|------|-------------------|-------------|------|
|           | REF  | 40728200.00       | 0           | 0.00 |
|           | 1h   | 39432200.00       | 0.00        | 0.00 |
|           | 2h   | 52533400.00       | 0.00        | 0.00 |
|           | 3h   | 44815700.00       | 0.00        | 0.00 |
|           | 4h   | 54913200.00       | 0.00        | 0.00 |
|           | 5h   | 40823300.00       | 0.00        | 0.00 |
|           | 6h   | 45810700.00       | 0.00        | 0.00 |
|           | 7h   | 45927100.00       | 447332.00   | 0.96 |
|           | 8h   | 54772000.00       | 1110760.00  | 1.98 |
|           | 24h  | 49803000.00       | 1012790.00  | 1.99 |
|           | 48h  | 38693800.00       | 1058890.00  | 2.66 |

Table S40 1 molar equivalent of  $[\text{mTBDH}][\text{OAc}]$ , 1 molar equivalent of water and 2 equivalent of ethylene glycol.



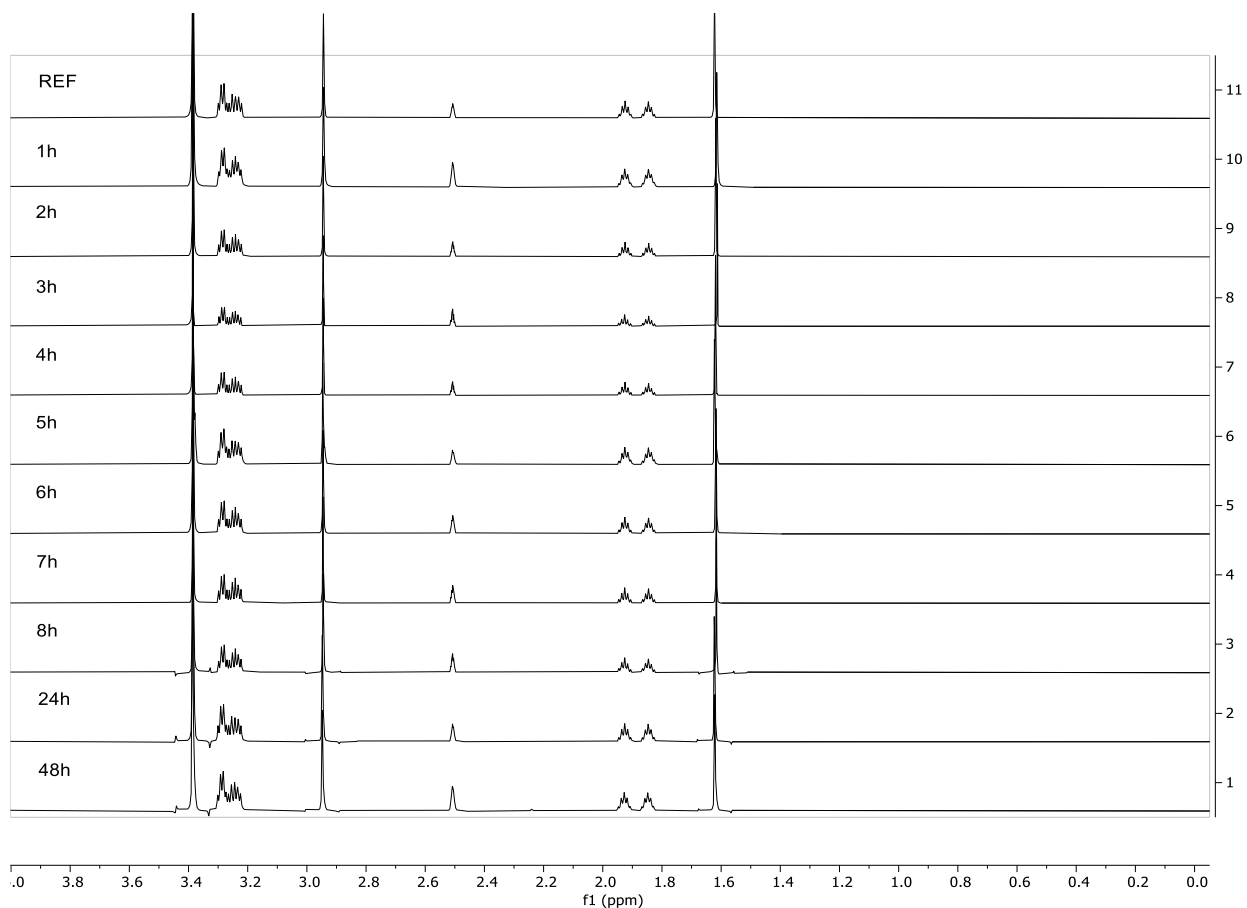

Figure S40  $^1\text{H}$  NMR 1 molar equivalent of  $[\text{mTBDH}][\text{OAc}]$ , 1 molar equivalent of water and 2 equivalent of ethylene glycol.

d.  $[\text{mTBDH}][\text{OAc}] + \text{water} + \text{phenol}$

| Structure | Time | integral N-Methyl | integral HP1 | integral HP2 | % HP  |
|-----------|------|-------------------|--------------|--------------|-------|
|           | REF  | 165294000.00      | 76785.50     | 0.00         | 0.00  |
|           | 1h   | 147810000.00      | 79809.10     | 392839.00    | 0.32  |
|           | 2h   | 161510000.00      | 292915.00    | 1544320.00   | 1.12  |
|           | 3h   | 119936000.00      | 408654.00    | 1865310.00   | 1.86  |
|           | 4h   | 168495000.00      | 580824.00    | 3299660.00   | 2.25  |
|           | 5h   | 140427000.00      | 605066.00    | 3511120.00   | 2.85  |
|           | 6h   | 152032000.00      | 460523.00    | 4319370.00   | 3.05  |
|           | 7h   | 125511000.00      | 654547.00    | 4492950.00   | 3.94  |
|           | 8h   | 118258000.00      | 523084.00    | 4510660.00   | 4.08  |
|           | 24h  | 116058000.00      | 2366320.00   | 14320700.00  | 12.57 |
|           | 48h  | 122396000.00      | 4054290.00   | 23128600.00  | 18.17 |

Table S41 1 molar equivalent of  $[\text{mTBDH}][\text{OAc}]$ , 1 molar equivalent of water and 0.2 equivalent of phenol.

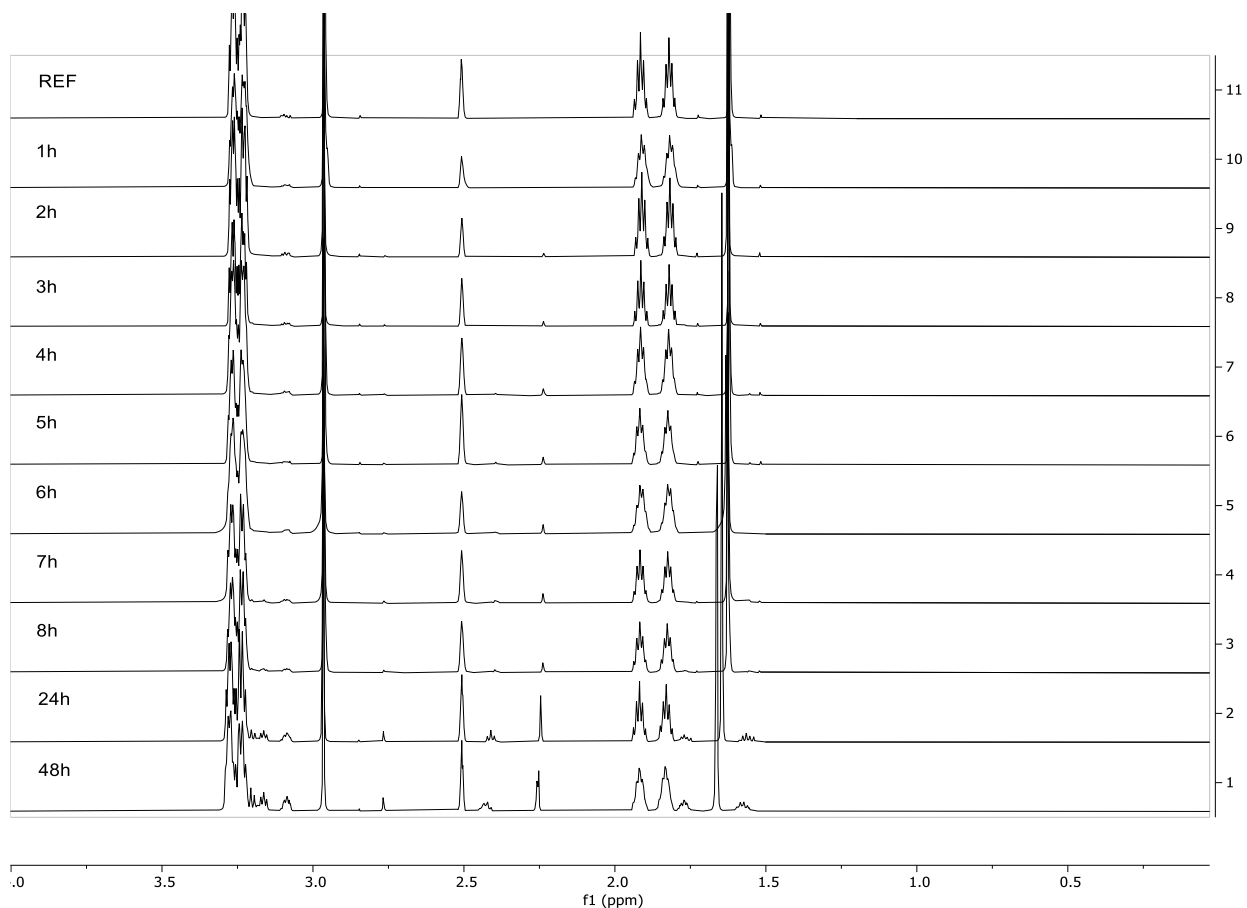

Figure S41 <sup>1</sup>H NMR 1 molar equivalent of [mTBDH][OAc], 1 molar equivalent of water and 0.2 equivalent of phenol.

| Structure | Time | Integral N-Methyl | Integral HP1 | integral HP2 | % HP  |
|-----------|------|-------------------|--------------|--------------|-------|
|           | REF  | 167377000.00      | 0.00         | 9634.23      | 0.00  |
|           | 1h   | 118982000.00      | 532701.00    | 112618.00    | 0.54  |
|           | 2h   | 118458000.00      | 1000700.00   | 300268.00    | 1.09  |
|           | 3h   | 157765000.00      | 2090440.00   | 628590.00    | 1.69  |
|           | 4h   | 148808000.00      | 2619370.00   | 734559.00    | 2.20  |
|           | 5h   | 155827000.00      | 3350090.00   | 893023.00    | 2.65  |
|           | 6h   | 143590000.00      | 3765590.00   | 899659.00    | 3.15  |
|           | 7h   | 109142000.00      | 3114390.00   | 732393.00    | 3.40  |
|           | 8h   | 149036000.00      | 4997910.00   | 1173020.00   | 3.98  |
|           | 24h  | 135401000.00      | 12265300.00  | 2754340.00   | 9.99  |
|           | 48h  | 136813000.00      | 18332000.00  | 4443030.00   | 14.27 |

Table S42 1 molar equivalent of [mTBDH][OAc], 1 molar equivalent of water and 0.5 equivalent of phenol.

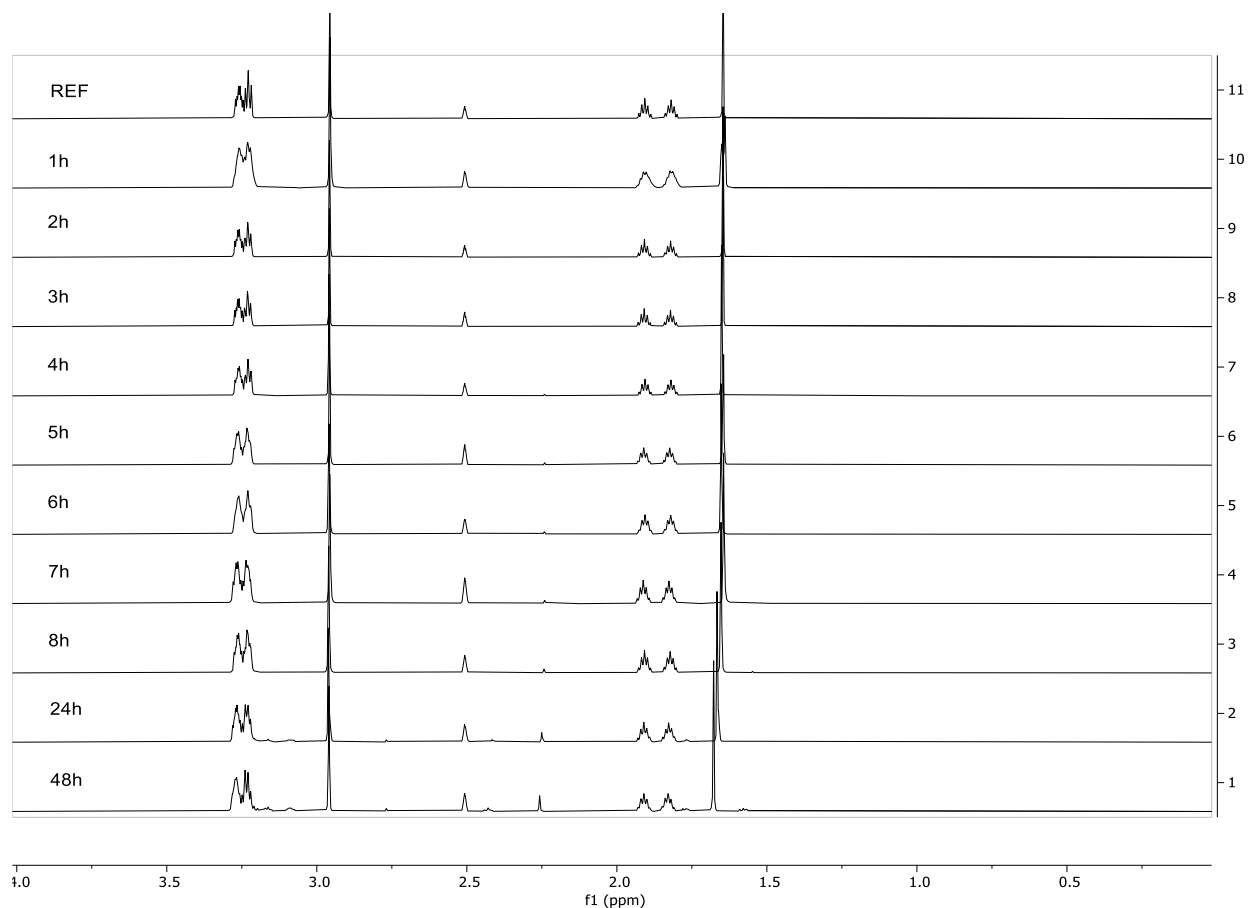

Figure S42  $^1\text{H}$  NMR 1 molar equivalent of [mTBDH][OAc], 1 molar equivalent of water and 0.5 equivalent of phenol.

| Structure | Time | Integral N-Methyl | Integral HP1 | Integral HP2 | % HP |
|-----------|------|-------------------|--------------|--------------|------|
|           | REF  | 110274000.00      | 0.00         | 0.00         | 0.00 |
|           | 1h   | 115888000.00      | 55360.00     | 0.00         | 0.05 |
|           | 2h   | 117582000.00      | 241886.00    | 0.00         | 0.21 |
|           | 3h   | 115735000.00      | 411067.00    | 0.00         | 0.35 |
|           | 4h   | 114949000.00      | 599663.00    | 0.00         | 0.54 |
|           | 5h   | 125686000.00      | 707271.00    | 0.00         | 0.56 |
|           | 6h   | 96610300.00       | 813468.00    | 43969.10     | 0.88 |
|           | 7h   | 91623400.00       | 853002.00    | 86507.70     | 1.01 |
|           | 8h   | 105091000.00      | 1092300.00   | 180675.00    | 1.20 |
|           | 24h  | 125779000.00      | 5733440.00   | 1000280.00   | 5.08 |
|           | 48h  | 127394000.00      | 8290200.00   | 1374600.00   | 7.05 |

Table S43 1 molar equivalent of [mTBDH][OAc], 1 molar equivalent of water and 1 equivalent of phenol.

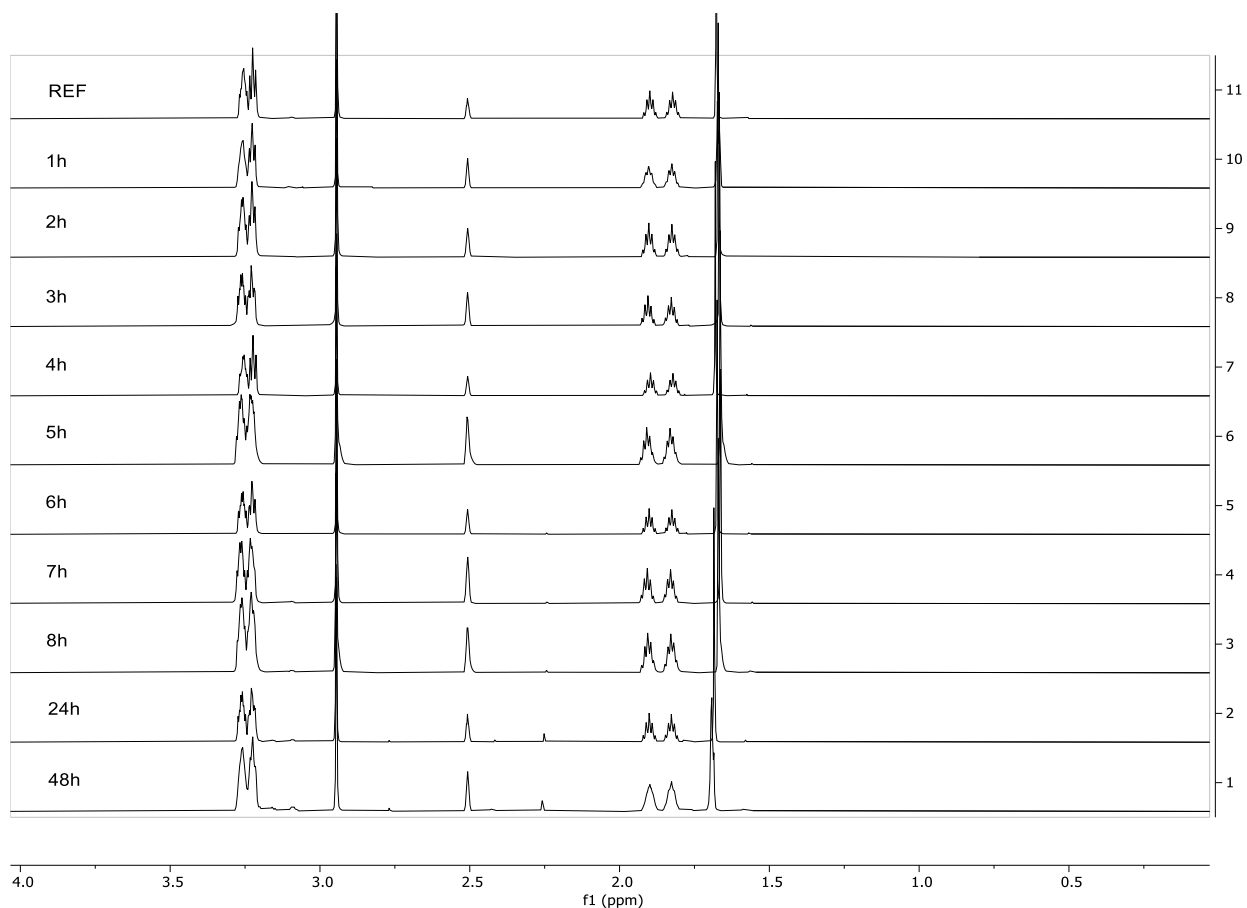

Figure S43  $^1\text{H}$  NMR 1 molar equivalent of  $[\text{mTBDH}][\text{OAc}]$ , 1 molar equivalent of water and 1 equivalent of phenol.

| Structure | Time | Integral N-Methyl | Integral HP1 | Integral HP2 | % HP |
|-----------|------|-------------------|--------------|--------------|------|
|           | REF  | 94477100.00       | 0.00         | 0.00         | 0.00 |
|           | 1h   | 94304500.00       | 0.00         | 0.00         | 0.00 |
|           | 2h   | 96218400.00       | 0.00         | 0.00         | 0.00 |
|           | 3h   | 89197500.00       | 0.00         | 0.00         | 0.00 |
|           | 4h   | 107398000.00      | 0.00         | 0.00         | 0.00 |
|           | 5h   | 96372800.00       | 0.00         | 0.00         | 0.00 |
|           | 6h   | 93533200.00       | 69782.40     | 0.00         | 0.07 |
|           | 7h   | 94355800.00       | 70723.50     | 0.00         | 0.07 |
|           | 8h   | 105450000.00      | 138904.00    | 0.00         | 0.13 |
|           | 24h  | 98567200.00       | 367650.00    | 0.00         | 0.37 |
|           | 48h  | 123046000.00      | 785203.00    | 0.00         | 0.63 |

Table S44 1 molar equivalent of  $[\text{mTBDH}][\text{OAc}]$ , 1 molar equivalent of water and 2 equivalent of phenol.

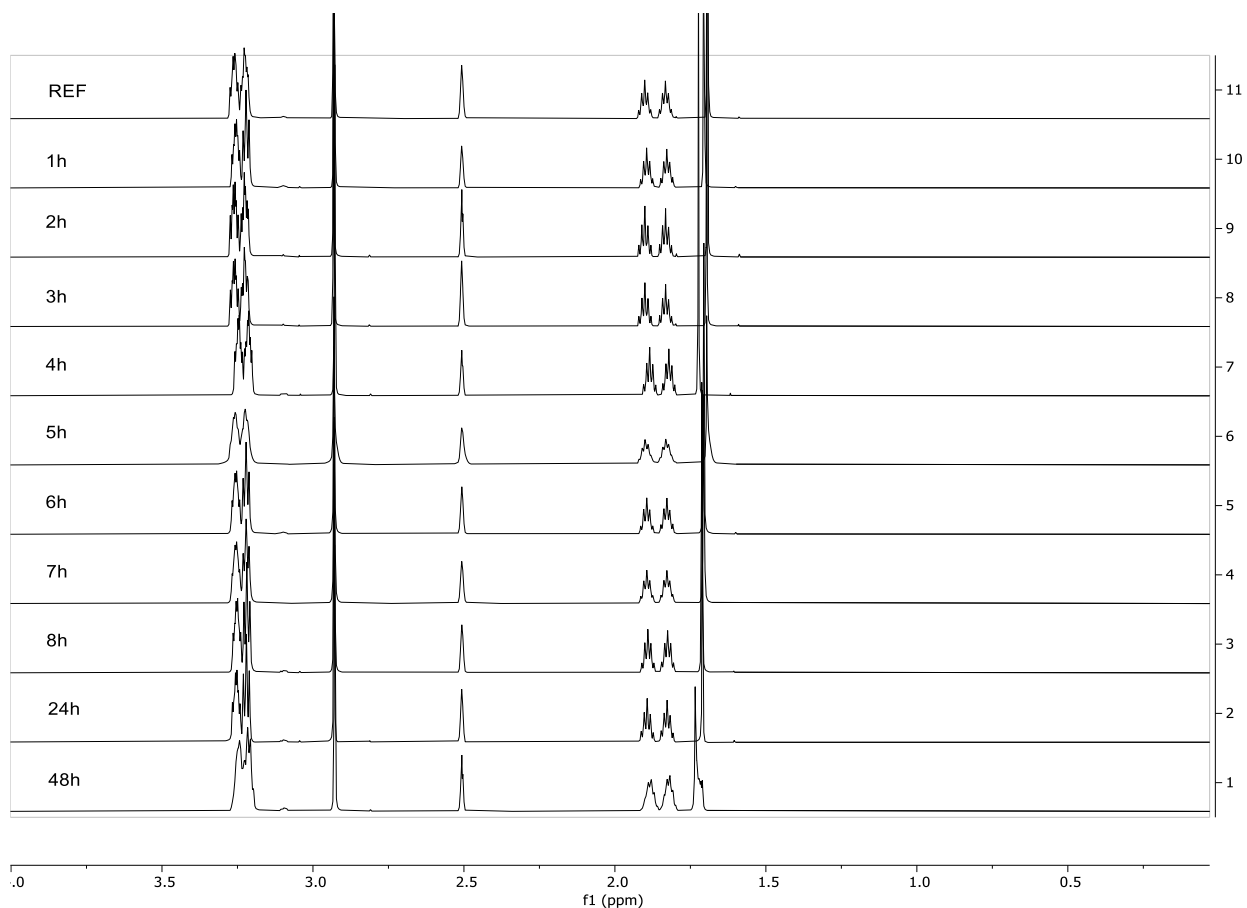

Figure S44  $^1\text{H}$  NMR 1 molar equivalent of  $[\text{mTBDH}][\text{OAc}]$ , 1 molar equivalent of water and 2 equivalent of phenol.

e.  $[\text{mTBDH}][\text{OAc}] + \text{water} + \text{propanol}$

| Structure | Time | Integral N-Methyl | Integral HP1 | Integral HP2 | % HP  |
|-----------|------|-------------------|--------------|--------------|-------|
|           | REF  | 84484500.00       | 0.00         | 0.00         | 0.00  |
|           | 1h   | 68408800.00       | 18307.60     | 38540.10     | 0.08  |
|           | 2h   | 79791000.00       | 175047.00    | 174703.00    | 0.44  |
|           | 3h   | 66184700.00       | 217301.00    | 104381.00    | 0.48  |
|           | 4h   | 74511800.00       | 724356.00    | 191304.00    | 1.21  |
|           | 5h   | 65528300.00       | 1035380.00   | 234082.00    | 1.90  |
|           | 6h   | 73712500.00       | 2782910.00   | 614932.00    | 4.41  |
|           | 7h   | 59115300.00       | 2310500.00   | 616419.00    | 4.72  |
|           | 8h   | 74154700.00       | 3475430.00   | 985239.00    | 5.67  |
|           | 24h  | 65042200.00       | 8021190.00   | 1950690.00   | 13.29 |
|           | 48h  | 46565200.00       | 10879700.00  | 2760910.00   | 22.66 |

Table S45 1 molar equivalent of  $[\text{mTBDH}][\text{OAc}]$ , 1 molar equivalent of water and 0.2 equivalent of propanol.

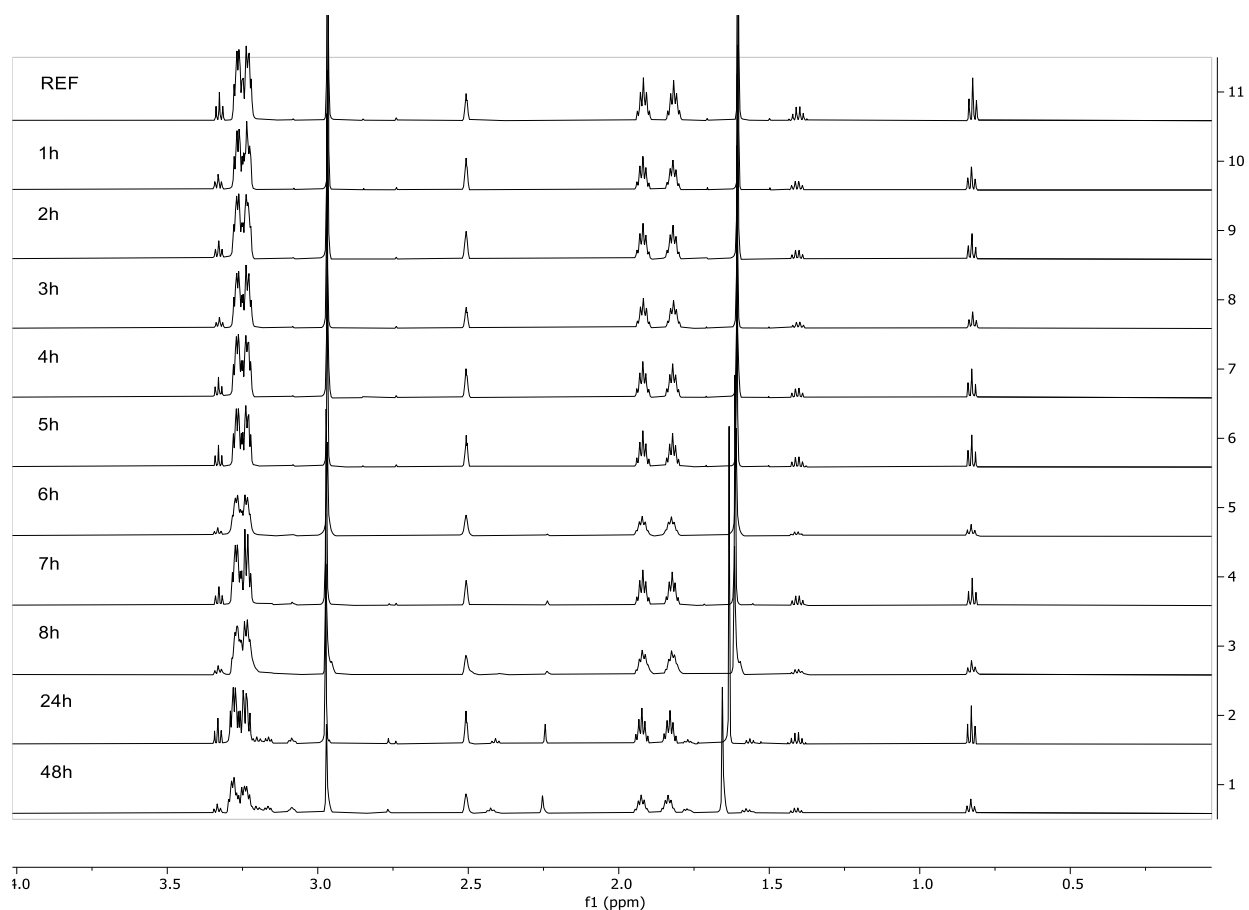

Figure S45 <sup>1</sup>H NMR 1 molar equivalent of [mTBDH][OAc], 1 molar equivalent of water and 0.2 equivalent of propanol.

| Structure | Time | Integral N-Methyl | Integral HP1 | Integral HP2 | % HP  |
|-----------|------|-------------------|--------------|--------------|-------|
|           | REF  | 64812100.00       | 0.00         | 0.00         | 0.00  |
|           | 1h   | 61347200.00       | 32511.30     | 64286.20     | 0.16  |
|           | 2h   | 57469100.00       | 326234.00    | 89793.90     | 0.72  |
|           | 3h   | 64071900.00       | 388087.00    | 135482.00    | 0.81  |
|           | 4h   | 34639700.00       | 422720.00    | 76244.50     | 1.42  |
|           | 5h   | 64904500.00       | 924000.00    | 178794.00    | 1.67  |
|           | 6h   | 62346200.00       | 1630630.00   | 342097.00    | 3.07  |
|           | 7h   | 57966100.00       | 1900510.00   | 443752.00    | 3.89  |
|           | 8h   | 67526400.00       | 2550020.00   | 616949.00    | 4.48  |
|           | 24h  | 62620200.00       | 5871490.00   | 1179400.00   | 10.12 |
|           | 48h  | 55048100.00       | 9768040.00   | 1896910.00   | 17.49 |

Table S46 1 molar equivalent of [mTBDH][OAc], 1 molar equivalent of water and 0.5 equivalent of propanol.

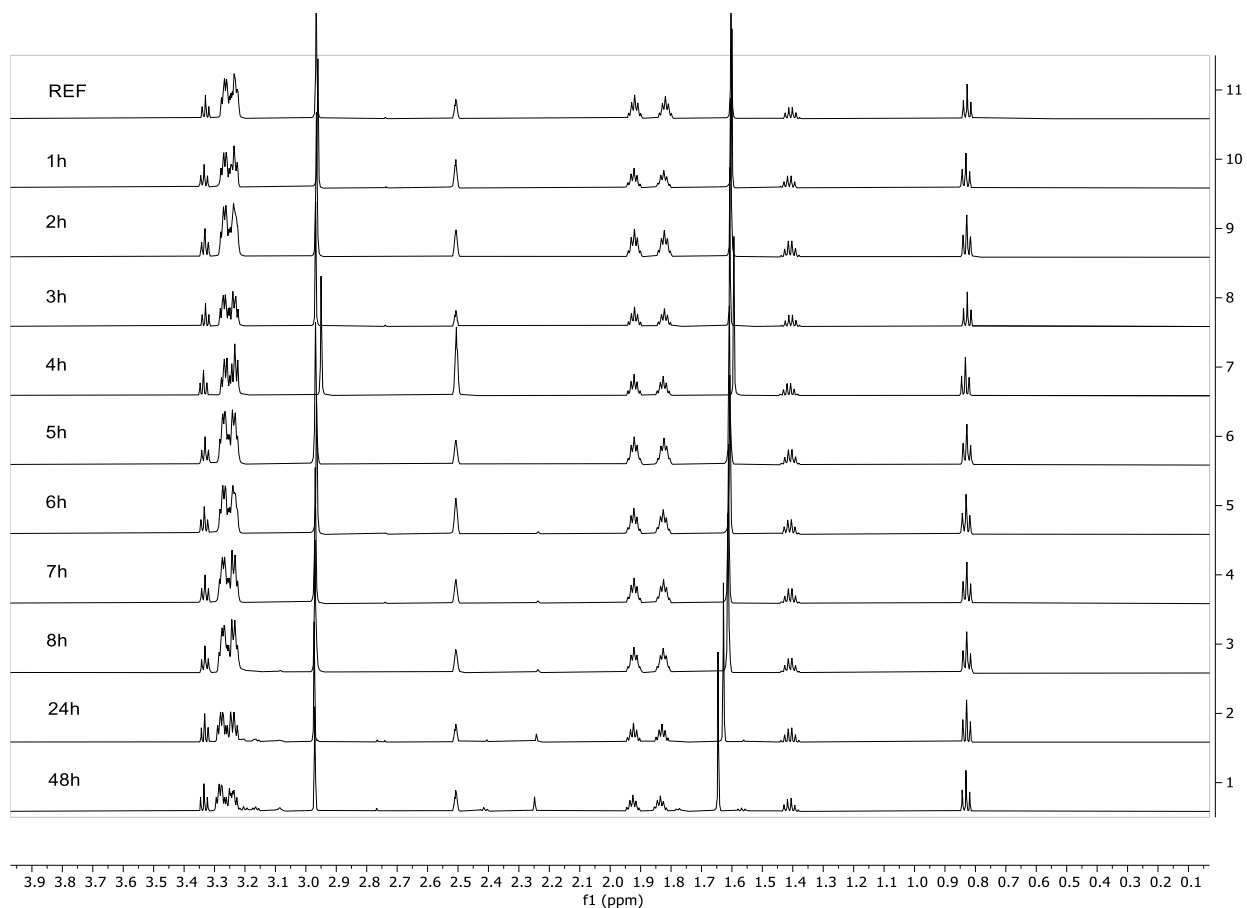

Figure S46  $^1\text{H}$  NMR 1 molar equivalent of  $[\text{mTBDH}][\text{OAc}]$ , 1 molar equivalent of water and 0.5 equivalent of propanol.

| Structure | Time | Integral N-Methyl | Integral HP1 | Integral HP2 | % HP  |
|-----------|------|-------------------|--------------|--------------|-------|
|           | REF  | 57015800.00       | 79476.40     | 271673.00    | 0.00  |
|           | 1h   | 67016500.00       | 243119.00    | 269865.00    | 0.76  |
|           | 2h   | 56704200.00       | 307788.00    | 234908.00    | 0.95  |
|           | 3h   | 52275700.00       | 397297.00    | 206769.00    | 1.14  |
|           | 4h   | 54649400.00       | 498359.00    | 205603.00    | 1.27  |
|           | 5h   | 51427100.00       | 994750.00    | 355901.00    | 2.56  |
|           | 6h   | 22130900.00       | 585583.00    | 231556.00    | 3.56  |
|           | 7h   | 63917600.00       | 2044520.00   | 686176.00    | 4.10  |
|           | 8h   | 68008800.00       | 2786640.00   | 952591.00    | 5.21  |
|           | 24h  | 50579700.00       | 4411450.00   | 1042500.00   | 9.73  |
|           | 48h  | 58312800.00       | 8668970.00   | 1435500.00   | 14.77 |

Table S47 1 molar equivalent of  $[\text{mTBDH}][\text{OAc}]$ , 1 molar equivalent of water and 1 equivalent of propanol.

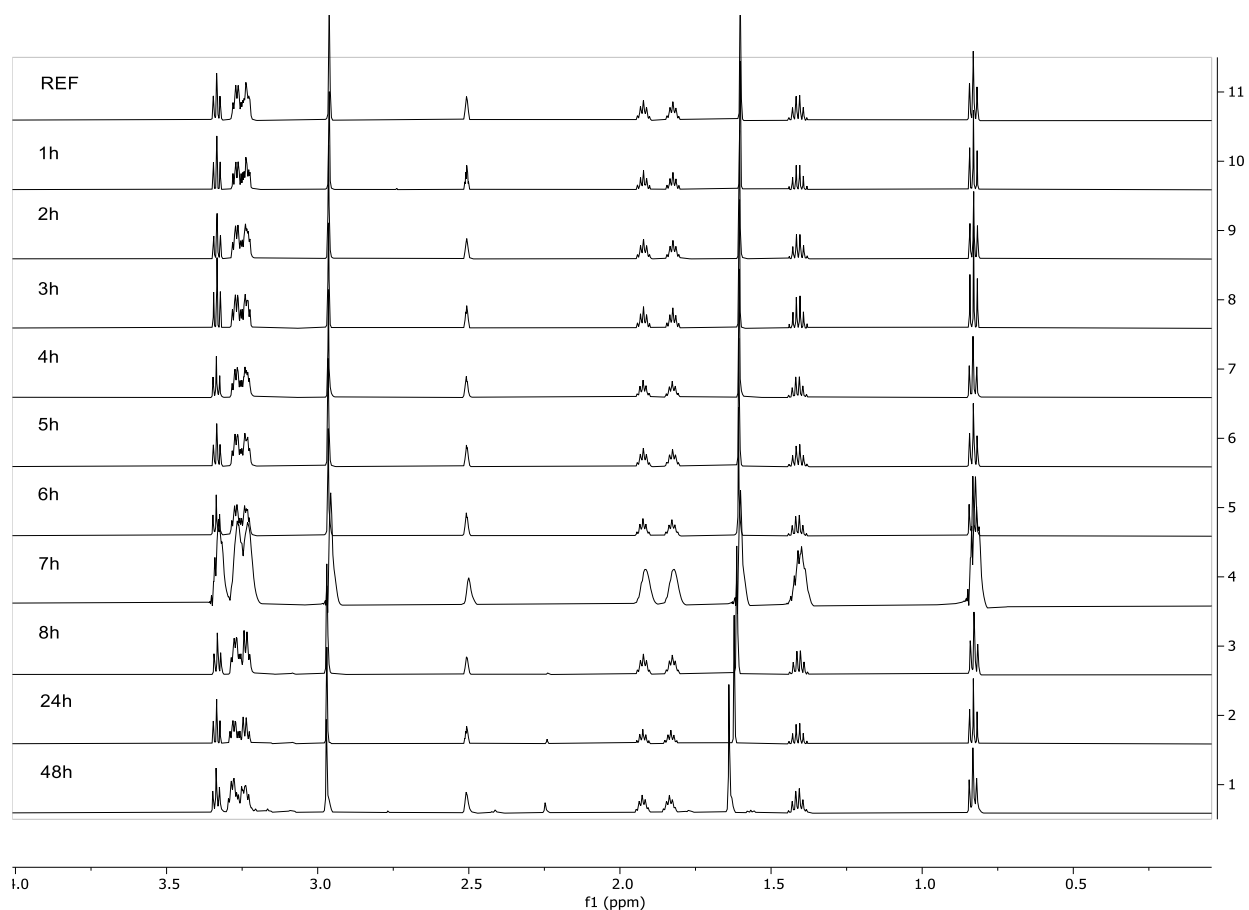

Figure S47 <sup>1</sup>H NMR 1 molar equivalent of [mTBDH][OAc], 1 molar equivalent of water and 1 equivalent of propanol.

| Structure | Time | Integral N-Methyl | Integral HP1 | Integral HP2 | % HP |
|-----------|------|-------------------|--------------|--------------|------|
|           | REF  | 37058200.00       | 170807.00    | 201449.00    | 0.00 |
|           | 1h   | 49564900.00       | 318944.00    | 249547.00    | 1.13 |
|           | 2h   | 44361900.00       | 353305.00    | 213274.00    | 1.26 |
|           | 3h   | 41176200.00       | 392978.00    | 228685.00    | 1.49 |
|           | 4h   | 41144800.00       | 409330.00    | 305697.00    | 1.71 |
|           | 5h   | 40652900.00       | 561238.00    | 267665.00    | 2.00 |
|           | 6h   | 44733700.00       | 804905.00    | 438262.00    | 2.70 |
|           | 7h   | 47402600.00       | 911997.00    | 466868.00    | 2.83 |
|           | 8h   | 48070900.00       | 1020670.00   | 363106.00    | 2.80 |
|           | 24h  | 33430100.00       | 1096870.00   | 251963.00    | 3.88 |
|           | 48h  | 45382500.00       | 3518530.00   | 719857.00    | 8.54 |

Table S48 1 molar equivalent of [mTBDH][OAc], 1 molar equivalent of water and 2 equivalents of propanol.



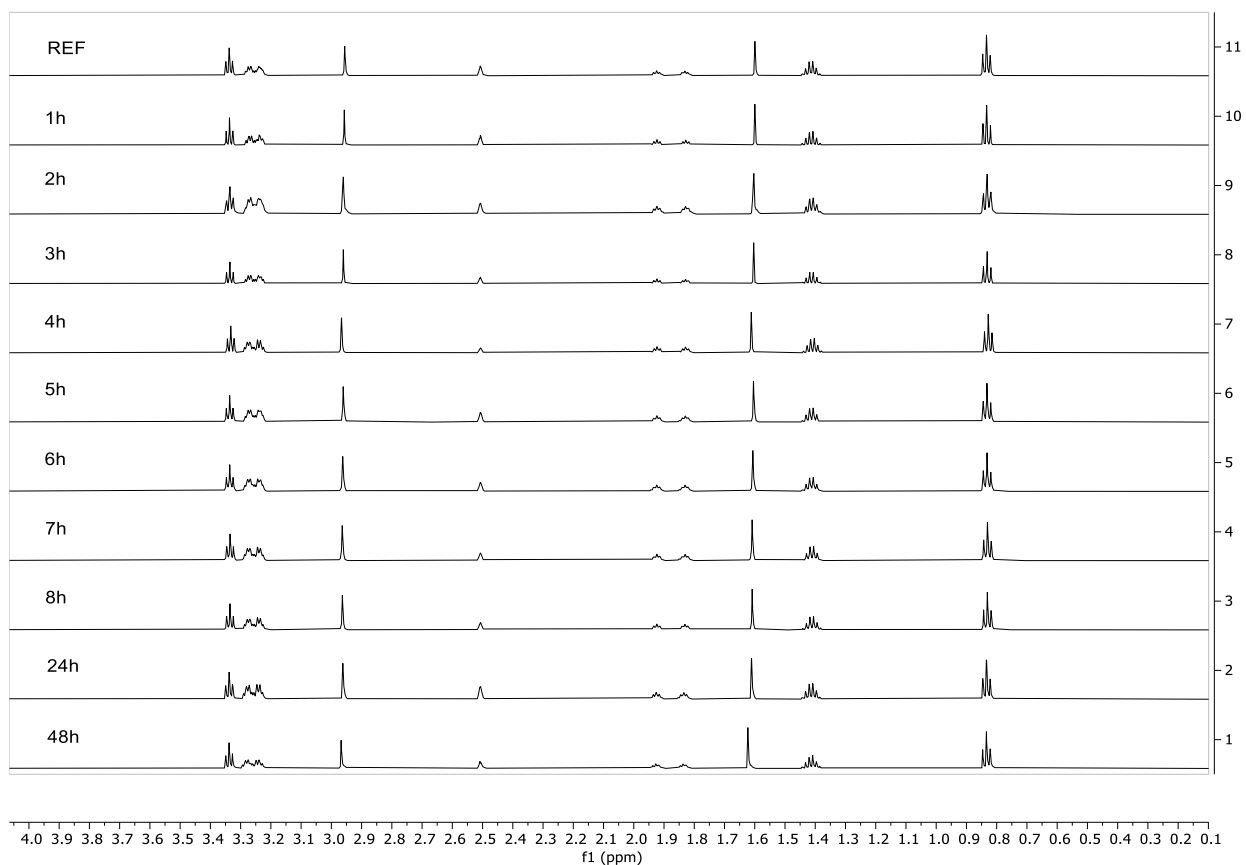

Figure S48  $^1\text{H}$  NMR 1 molar equivalent of  $[\text{mTBDH}][\text{OAc}]$ , 1 molar equivalent of water and 2 equivalents of propanol.

f.  $[\text{mTBDH}][\text{ClOAc}] + \text{water}$

| Structure | Time | Integral N-Methyl | Integral HP | % HP |
|-----------|------|-------------------|-------------|------|
|           | REF  | 104503000.00      | 0.00        | 0.00 |
|           | 1h   | 93095900.00       | 0.00        | 0.00 |
|           | 2h   | 92597000.00       | 0.00        | 0.00 |
|           | 3h   | 110276000.00      | 0.00        | 0.00 |
|           | 4h   | 87645400.00       | 0.00        | 0.00 |
|           | 5h   | 92377800.00       | 0.00        | 0.00 |
|           | 6h   | 91907800.00       | 0.00        | 0.00 |
|           | 7h   | 99368900.00       | 0.00        | 0.00 |
|           | 8h   | 92520900.00       | 0.00        | 0.00 |
|           | 24h  | 104512000.00      | 0.00        | 0.00 |
|           | 48h  | 90166700.00       | 0.00        | 0.00 |

Table S49 1 molar equivalent of  $[\text{mTBDH}][\text{ClOAc}]$ , and 0.2 molar equivalent of water.

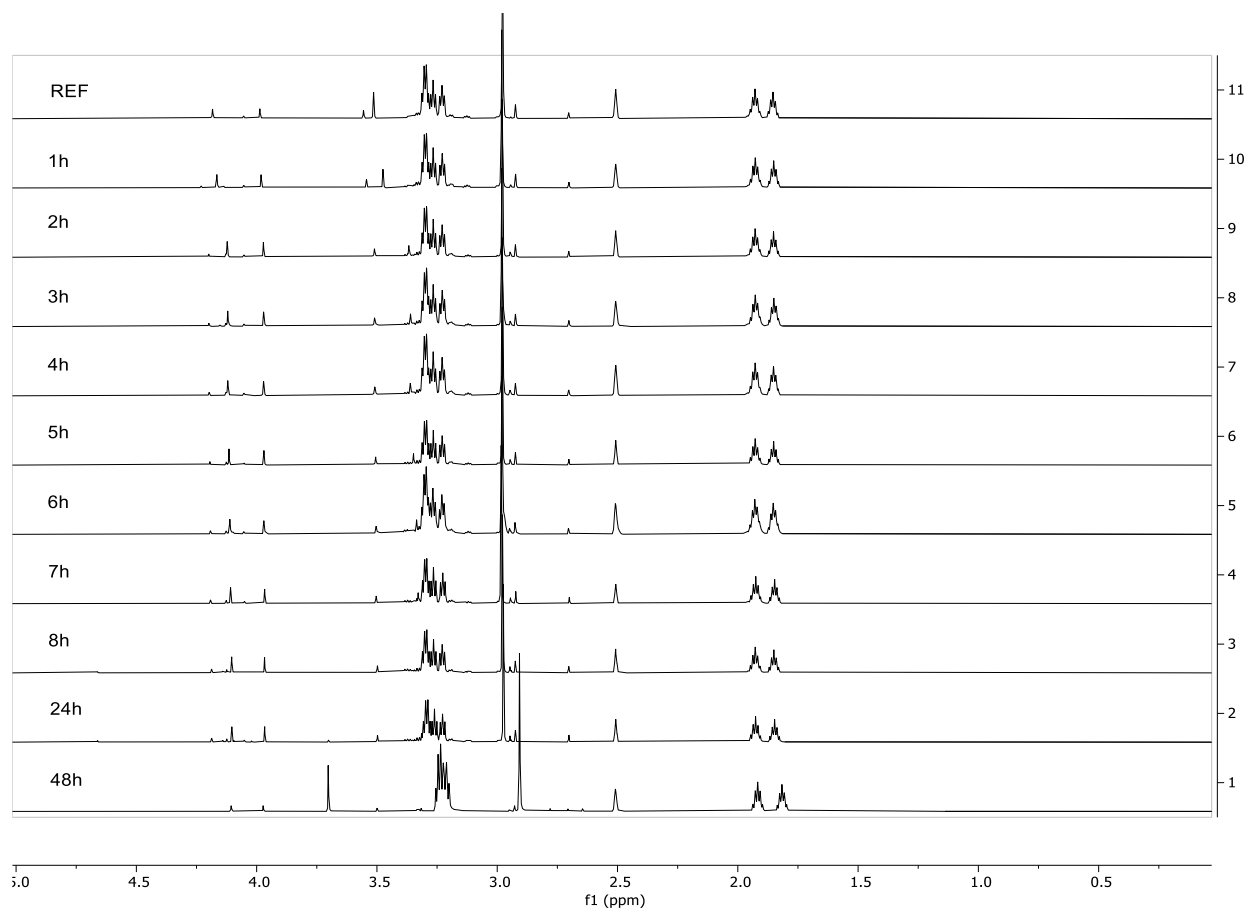

Figure S49  $^1\text{H}$  NMR 1 molar equivalent of  $[\text{mTBDH}][\text{ClOAc}]$ , and 0.2 molar equivalent of water.

| Structure | Time | Integral N-Methyl | Integral HP | % HP |
|-----------|------|-------------------|-------------|------|
|           | REF  | 93985000.00       | 0.00        | 0.00 |
|           | 1h   | 70867500.00       | 0.00        | 0.00 |
|           | 2h   | 84298500.00       | 0.00        | 0.00 |
|           | 3h   | 78981400.00       | 0.00        | 0.00 |
|           | 4h   | 91804600.00       | 0.00        | 0.00 |
|           | 5h   | 82298900.00       | 0.00        | 0.00 |
|           | 6h   | 72674200.00       | 0.00        | 0.00 |
|           | 7h   | 81127700.00       | 0.00        | 0.00 |
|           | 8h   | 79763300.00       | 0.00        | 0.00 |
|           | 24h  | 76718000.00       | 0.00        | 0.00 |
|           | 48h  | 75877500.00       | 0.00        | 0.00 |

Table S50 1 molar equivalent of  $[\text{mTBDH}][\text{ClOAc}]$ , and 0,5 molar equivalent of water.

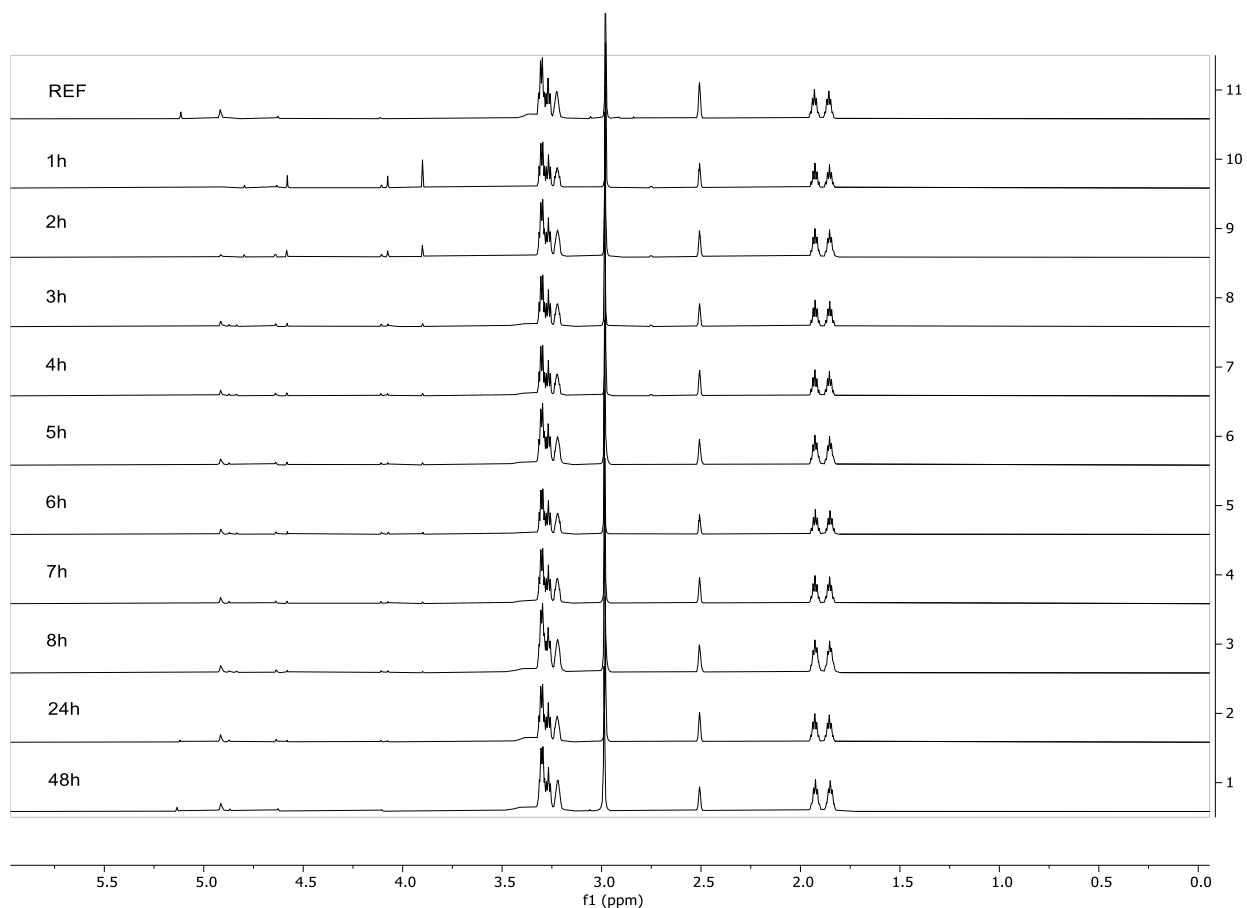

Figure S50 <sup>1</sup>H NMR 1 molar equivalent of [mTBDH][ClOAc], and 0,5 molar equivalent of water.

| Structure | Time | Integral N-Methyl | Integral HP | % HP |
|-----------|------|-------------------|-------------|------|
|           | REF  | 93985000.00       | 0.00        | 0.00 |
|           | 1h   | 70867500.00       | 0.00        | 0.00 |
|           | 2h   | 84298500.00       | 0.00        | 0.00 |
|           | 3h   | 78981400.00       | 0.00        | 0.00 |
|           | 4h   | 91804600.00       | 0.00        | 0.00 |
|           | 5h   | 82298900.00       | 0.00        | 0.00 |
|           | 6h   | 72674200.00       | 0.00        | 0.00 |
|           | 7h   | 81127700.00       | 0.00        | 0.00 |
|           | 8h   | 79763300.00       | 0.00        | 0.00 |
|           | 24h  | 76718000.00       | 0.00        | 0.00 |
|           | 48h  | 75877500.00       | 0.00        | 0.00 |

Table S51 1 molar equivalent of [mTBDH][ClOAc], and 1 molar equivalent of water.

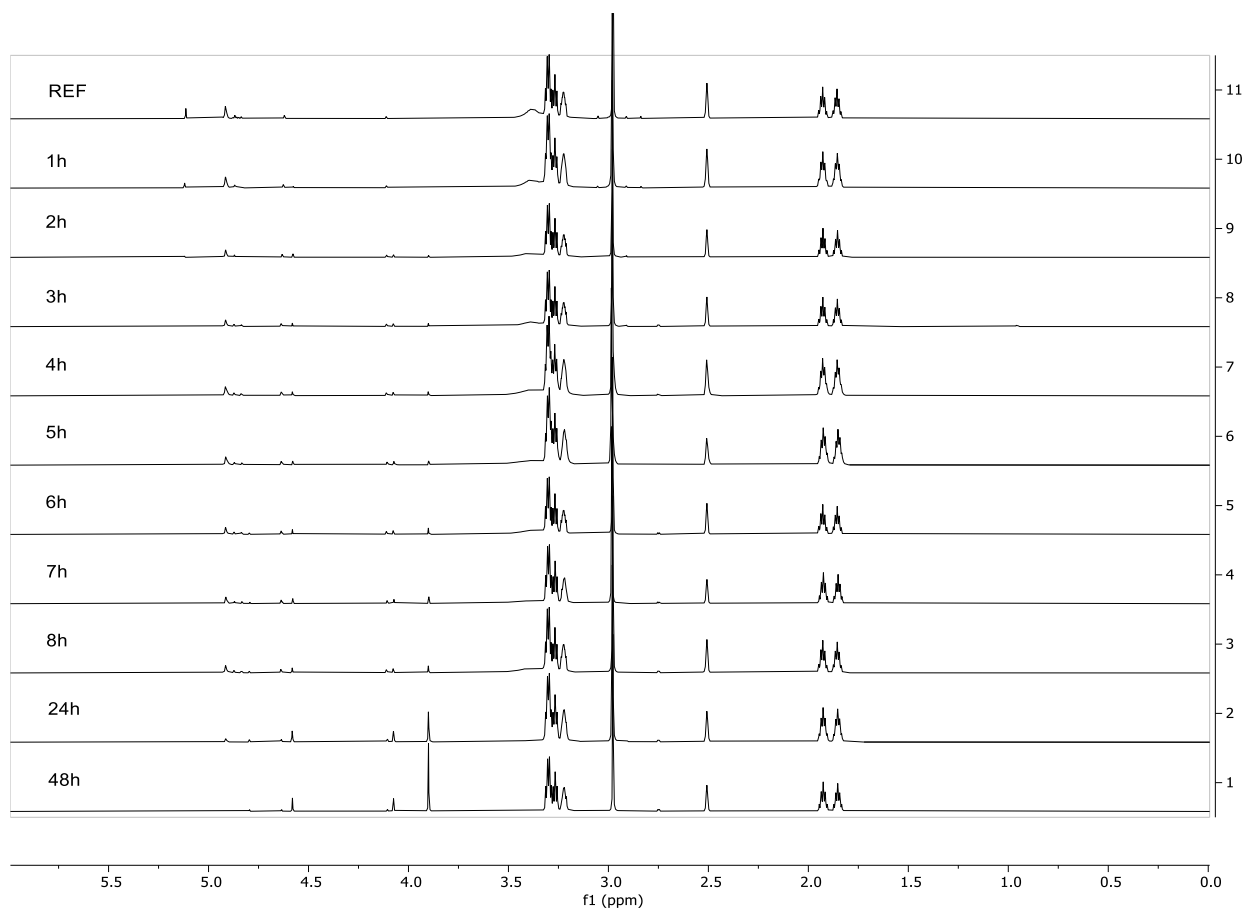

Figure S51 <sup>1</sup>H NMR 1 molar equivalent of [mTBDH][ClOAc], and 1 molar equivalent of water.

| Structure | Time | integral N-Methyl | integral HP | % HP |
|-----------|------|-------------------|-------------|------|
|           | REF  | 77083000.00       | 0.00        | 0.00 |
|           | 1h   | 64573900.00       | 0.00        | 0.00 |
|           | 2h   | 61348100.00       | 0.00        | 0.00 |
|           | 3h   | 64695500.00       | 0.00        | 0.00 |
|           | 4h   | 67582900.00       | 0.00        | 0.00 |
|           | 5h   | 71526600.00       | 0.00        | 0.00 |
|           | 6h   | 72275500.00       | 0.00        | 0.00 |
|           | 7h   | 69152100.00       | 0.00        | 0.00 |
|           | 8h   | 66048100.00       | 0.00        | 0.00 |
|           | 24h  | 54592000.00       | 0.00        | 0.00 |
|           | 48h  | 65177800.00       | 0.00        | 0.00 |

Table S52 1 molar equivalent of [mTBDH][ClOAc], and 5 molar equivalents of water.

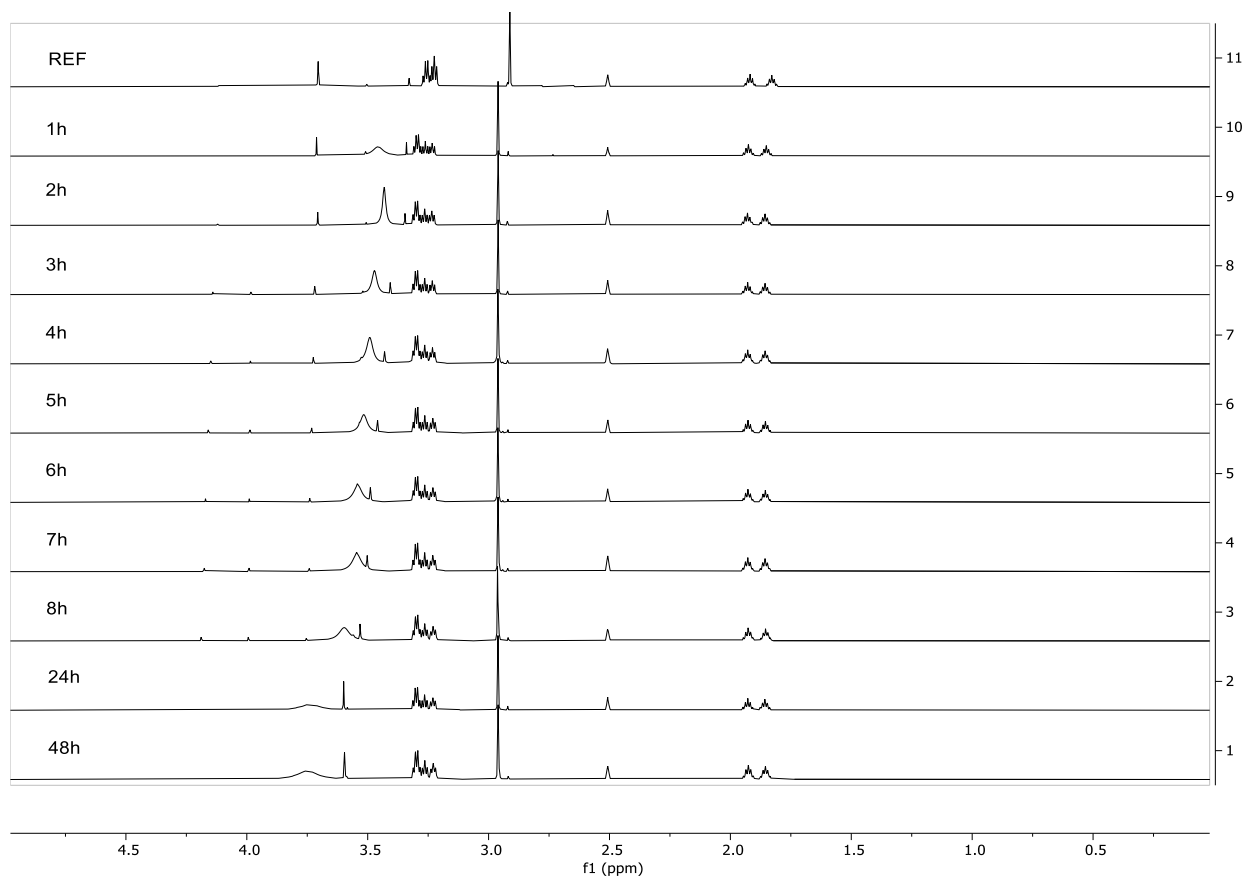

Figure S52  $^1\text{H}$  NMR 1 molar equivalent of [mTBDH][ClOAc], and 5 molar equivalents of water.

| Structure | Time | Integral N-Methyl | Integral HP | % HP |
|-----------|------|-------------------|-------------|------|
|           | REF  | 36177400.00       | 0.00        | 0.00 |
|           | 1h   | 39996600.00       | 0.00        | 0.00 |
|           | 2h   | 43278100.00       | 0.00        | 0.00 |
|           | 3h   | 36470500.00       | 0.00        | 0.00 |
|           | 4h   | 34948500.00       | 0.00        | 0.00 |
|           | 5h   | 35100800.00       | 0.00        | 0.00 |
|           | 6h   | 38051500.00       | 0.00        | 0.00 |
|           | 7h   | 41024100.00       | 0.00        | 0.00 |
|           | 8h   | 39730200.00       | 0.00        | 0.00 |
|           | 24h  | 37385900.00       | 0.00        | 0.00 |
|           | 48h  | 43431400.00       | 0.00        | 0.00 |

Table S53 1 molar equivalent of [mTBDH][ClOAc], and 10 molar equivalents of water.

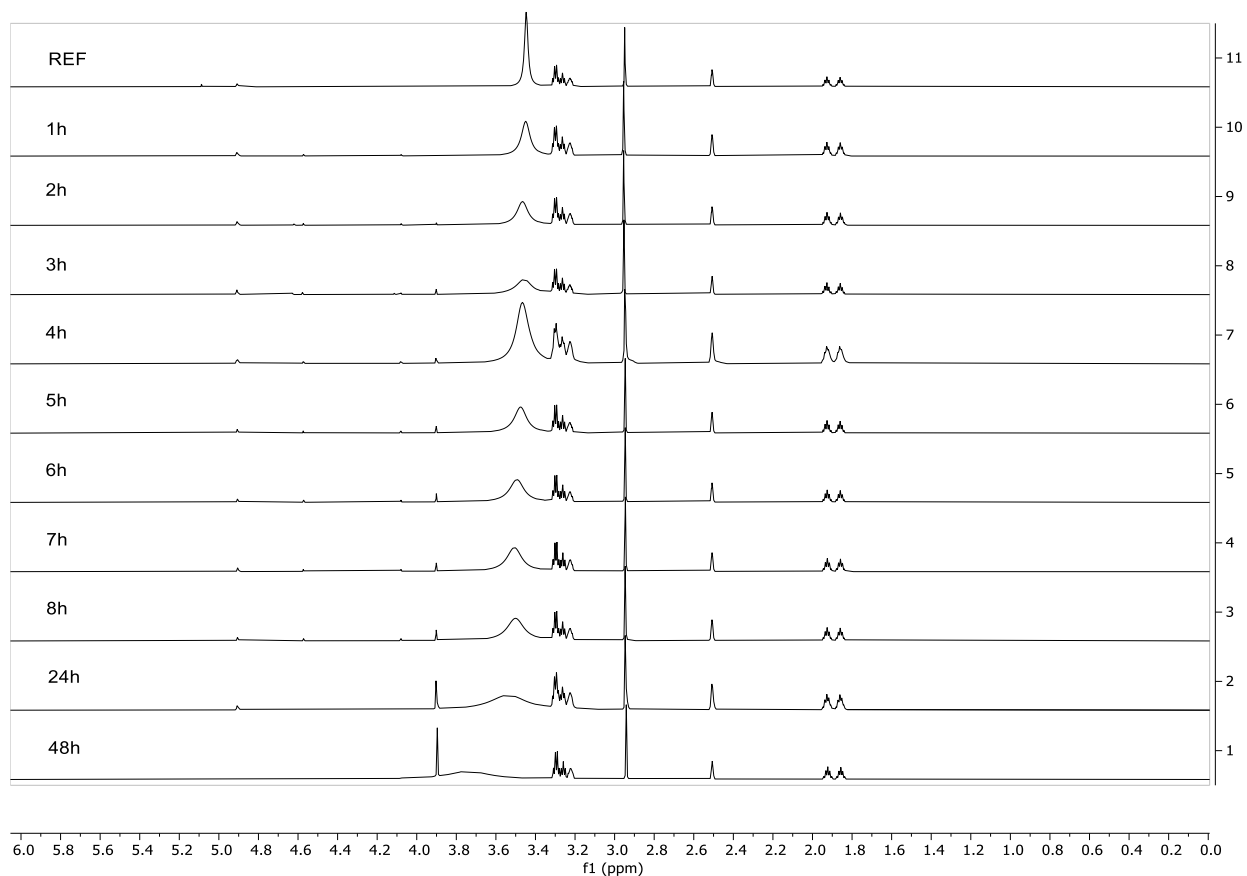

Figure S53  $^1\text{H}$  NMR 1 molar equivalent of  $[\text{mTBDH}][\text{ClOAc}]$ , and 10 molar equivalents of water.

g.  $[\text{mTBDH}][\text{Cl}_2\text{OAc}] + \text{water}$

| Structure | Time | Integral N-Methyl | Integral HP | % HP |
|-----------|------|-------------------|-------------|------|
|           | REF  | 104503000.00      | 0.00        | 0.00 |
|           | 1h   | 93095900.00       | 0.00        | 0.00 |
|           | 2h   | 92597000.00       | 0.00        | 0.00 |
|           | 3h   | 110276000.00      | 0.00        | 0.00 |
|           | 4h   | 87645400.00       | 0.00        | 0.00 |
|           | 5h   | 92377800.00       | 0.00        | 0.00 |
|           | 6h   | 91907800.00       | 0.00        | 0.00 |
|           | 7h   | 99368900.00       | 0.00        | 0.00 |
|           | 8hh  | 92520900.00       | 0.00        | 0.00 |
|           | 24h  | 104512000.00      | 0.00        | 0.00 |
|           | 48h  | 90166700.00       | 0.00        | 0.00 |

Table S54 1 molar equivalent of  $[\text{mTBDH}][\text{Cl}_2\text{OAc}]$ , and 0.2 molar equivalents of water.

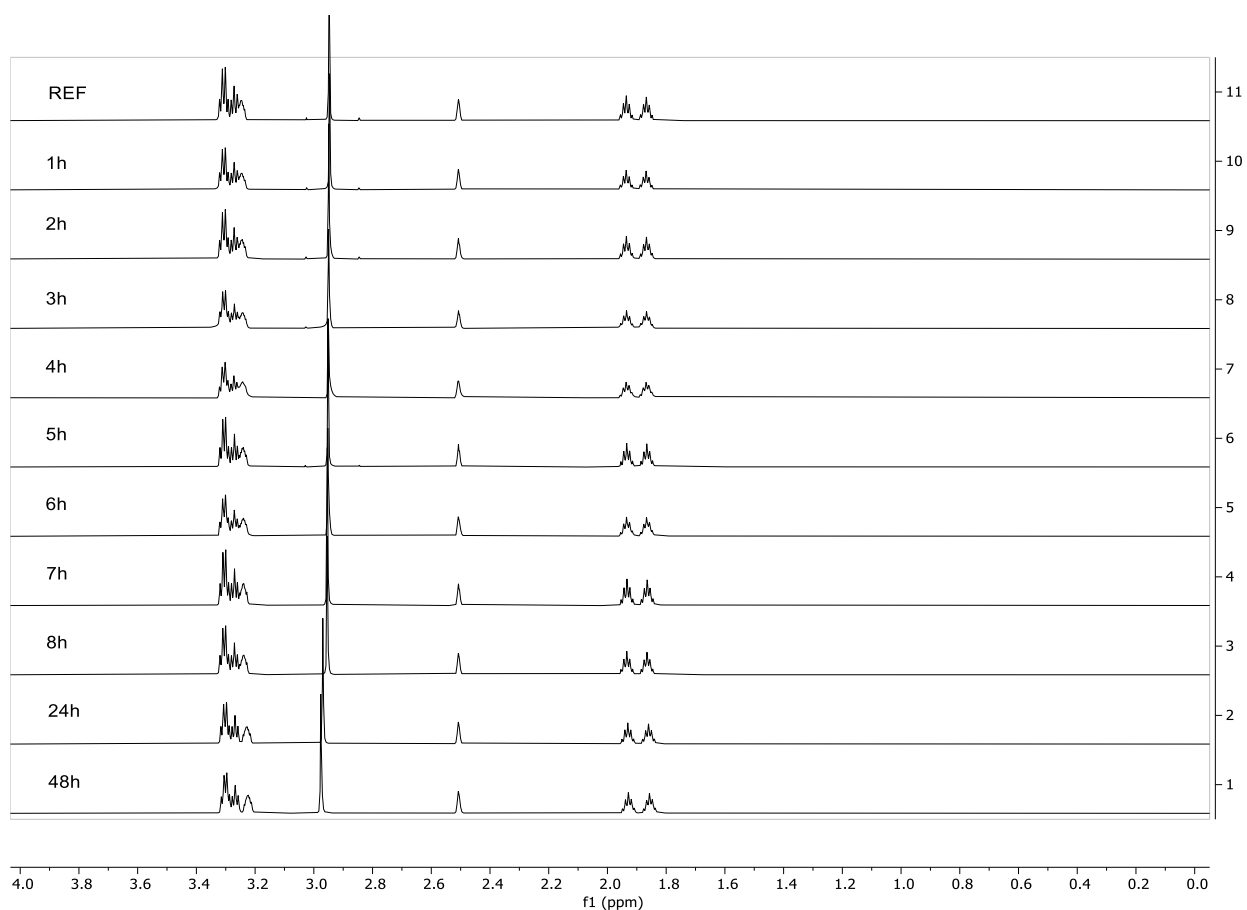

Figure S54  $^1\text{H}$  NMR 1 molar equivalent of  $[\text{mTBDH}][\text{Cl}_2\text{OAc}]$ , and 0.2 molar equivalents of water.

| Structure | Time | Integral N-Methyl | Integral HP | % HP |
|-----------|------|-------------------|-------------|------|
|           | REF  | 95727400.00       | 0.00        | 0.00 |
|           | 1h   | 104952000.00      | 0.00        | 0.00 |
|           | 2h   | 80083700.00       | 0.00        | 0.00 |
|           | 3h   | 88984100.00       | 0.00        | 0.00 |
|           | 4h   | 105413000.00      | 0.00        | 0.00 |
|           | 5h   | 94504700.00       | 0.00        | 0.00 |
|           | 6h   | 96958700.00       | 0.00        | 0.00 |
|           | 7h   | 82995400.00       | 0.00        | 0.00 |
|           | 8h   | 89189500.00       | 0.00        | 0.00 |
|           | 24h  | 87372400.00       | 0.00        | 0.00 |
|           | 48h  | 98684300.00       | 0.00        | 0.00 |

Table S55 1 molar equivalent of  $[\text{mTBDH}][\text{Cl}_2\text{OAc}]$ , and 0.5 molar equivalents of water.

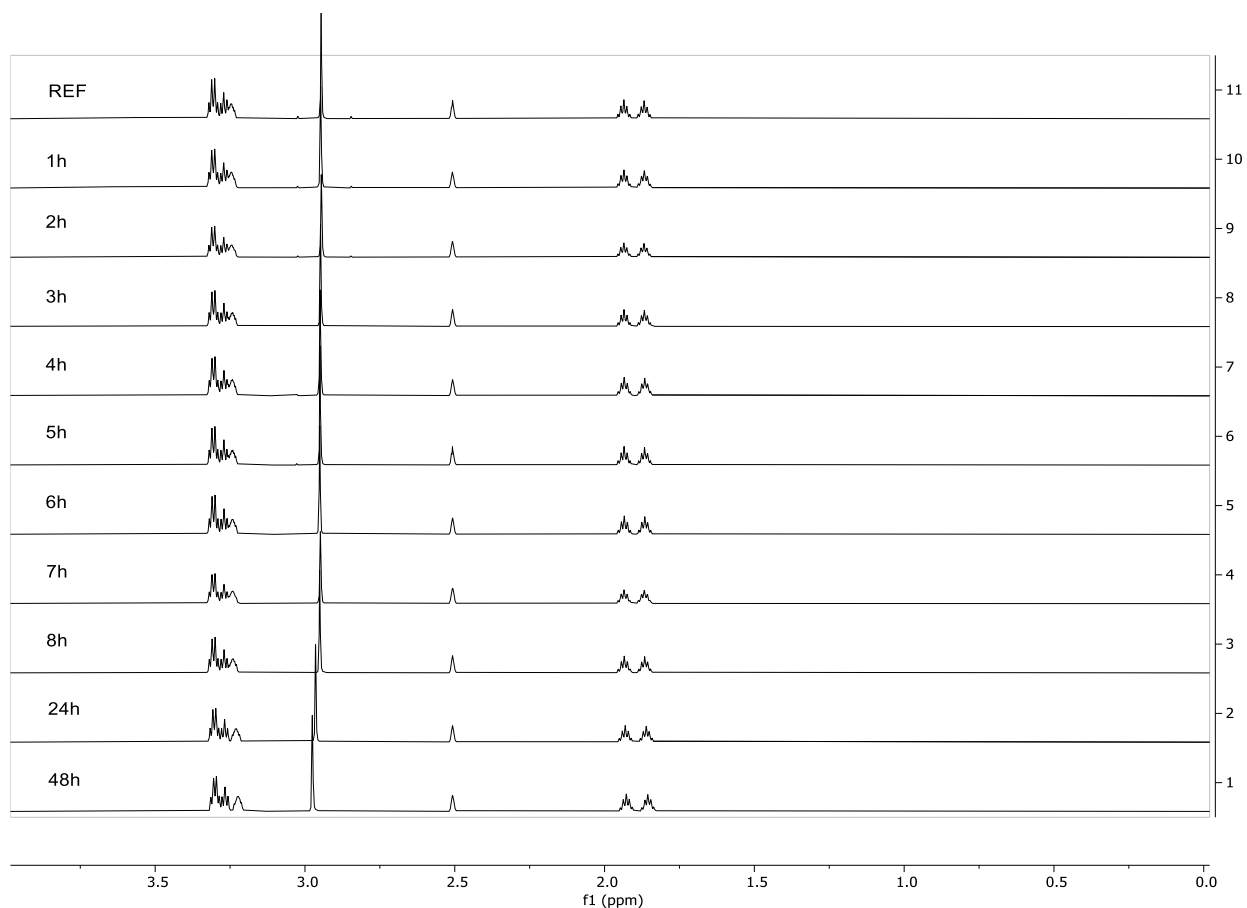

Figure S55 <sup>1</sup>H NMR 1 molar equivalent of [mTBDH][Cl<sub>2</sub>OAc], and 0.5 molar equivalents of water.

| Structure | Time | Integral N-Methyl | Integral HP | % HP |
|-----------|------|-------------------|-------------|------|
|           | REF  | 95914400.00       | 0.00        | 0.00 |
|           | 1h   | 91519400.00       | 0.00        | 0.00 |
|           | 2h   | 80262000.00       | 0.00        | 0.00 |
|           | 3h   | 87870300.00       | 0.00        | 0.00 |
|           | 4h   | 94979200.00       | 0.00        | 0.00 |
|           | 5h   | 85492800.00       | 0.00        | 0.00 |
|           | 6h   | 94911700.00       | 0.00        | 0.00 |
|           | 7h   | 90155300.00       | 0.00        | 0.00 |
|           | 8h   | 87162900.00       | 0.00        | 0.00 |
|           | 24h  | 84835700.00       | 0.00        | 0.00 |
|           | 48h  | 84549700.00       | 0.00        | 0.00 |

Table S56 1 molar equivalent of [mTBDH][Cl<sub>2</sub>OAc], and 1 molar equivalents of water.



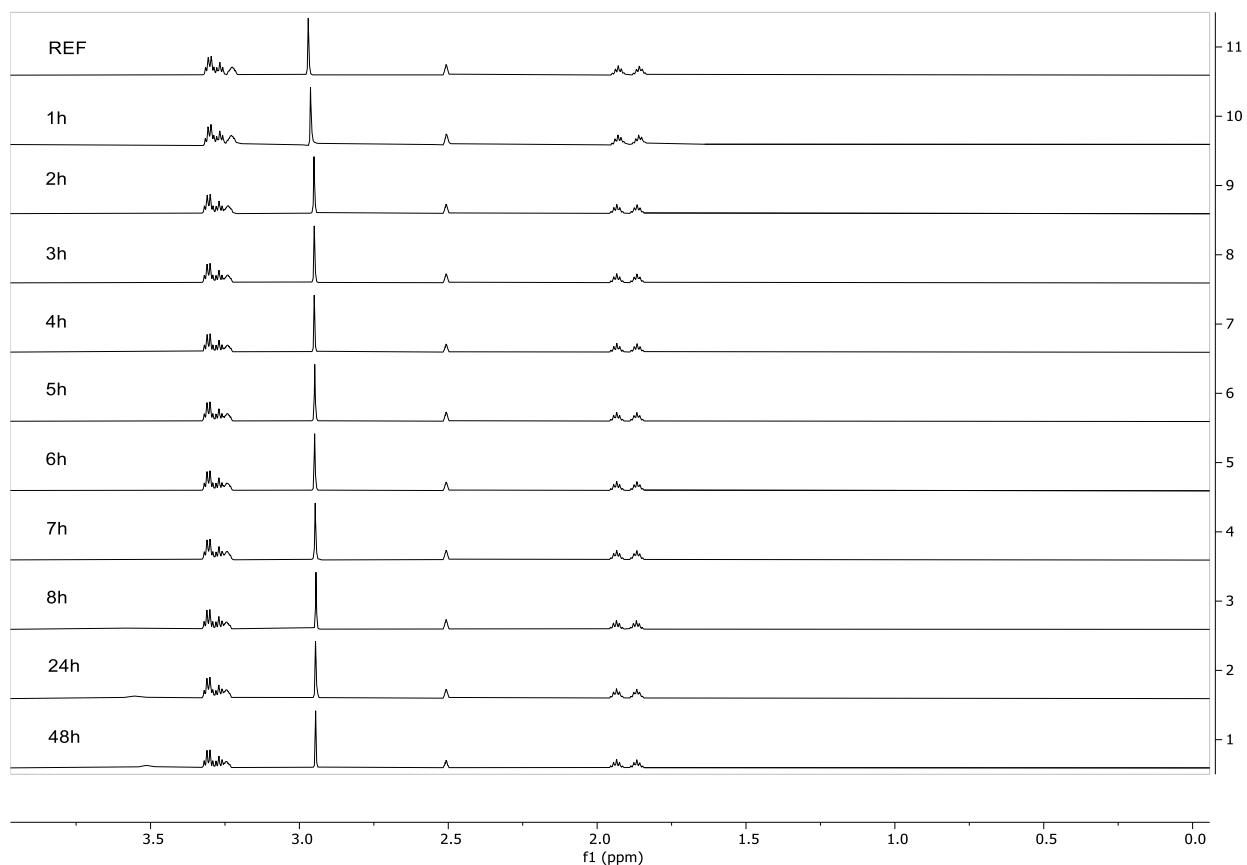

Figure S56  $^1\text{H}$  NMR 1 molar equivalent of [mTBDH][Cl<sub>2</sub>OAc], and 1 molar equivalents of water.

| Structure | Time | Integral N-Methyl | Integral HP | % HP |
|-----------|------|-------------------|-------------|------|
|           | REF  | 74052700.00       | 0.00        | 0.00 |
|           | 1h   | 70707400.00       | 0.00        | 0.00 |
|           | 2h   | 71223200.00       | 0.00        | 0.00 |
|           | 3h   | 75359100.00       | 0.00        | 0.00 |
|           | 4h   | 69089200.00       | 0.00        | 0.00 |
|           | 5h   | 74640600.00       | 0.00        | 0.00 |
|           | 6h   | 66418700.00       | 0.00        | 0.00 |
|           | 7h   | 70187400.00       | 0.00        | 0.00 |
|           | 24h  | 66157100.00       | 0.00        | 0.00 |
|           | 48h  | 90166700.00       | 0.00        | 0.00 |

Table S57 1 molar equivalent of [mTBDH][Cl<sub>2</sub>OAc], and 5 molar equivalents of water.

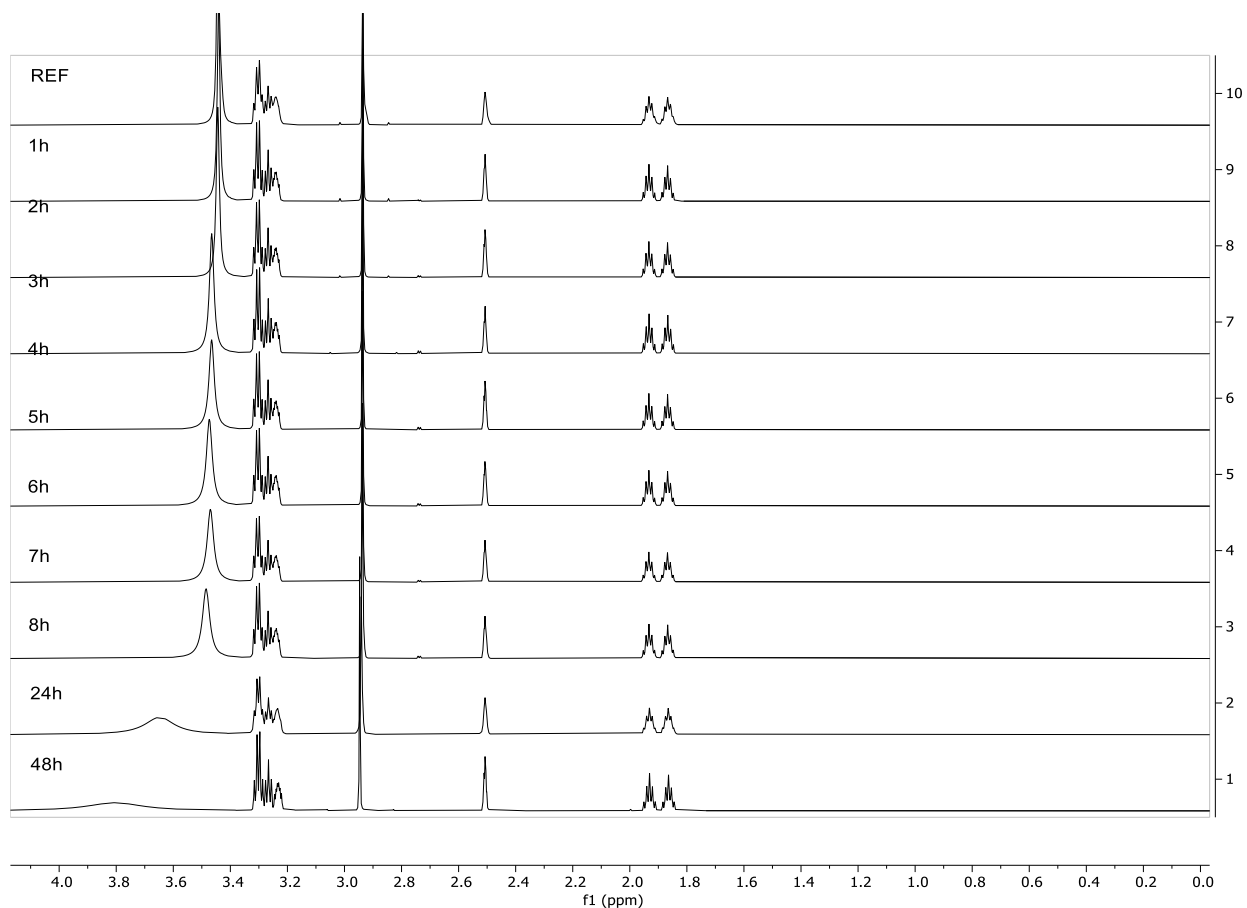

Figure S57  $^1\text{H}$  NMR 1 molar equivalent of  $[\text{mTBDH}][\text{Cl}_2\text{OAc}]$ , and 5 molar equivalents of water.

| Structure | Time | Integral N-Methyl | Integral HP | % HP |
|-----------|------|-------------------|-------------|------|
|           | REF  | 59747200.00       | 0.00        | 0.00 |
|           | 1h   | 54866300.00       | 0.00        | 0.00 |
|           | 2h   | 54554900.00       | 0.00        | 0.00 |
|           | 3h   | 53412400.00       | 0.00        | 0.00 |
|           | 4h   | 58450400.00       | 0.00        | 0.00 |
|           | 5h   | 57131900.00       | 0.00        | 0.00 |
|           | 6h   | 60565300.00       | 0.00        | 0.00 |
|           | 7h   | 44876400.00       | 0.00        | 0.00 |
|           | 8h   | 49536000.00       | 0.00        | 0.00 |
|           | 24h  | 48412500.00       | 0.00        | 0.00 |
|           | 48h  | 49651700.00       | 0.00        | 0.00 |

Table S58 1 molar equivalent of  $[\text{mTBDH}][\text{Cl}_2\text{OAc}]$ , and 10 molar equivalents of water.

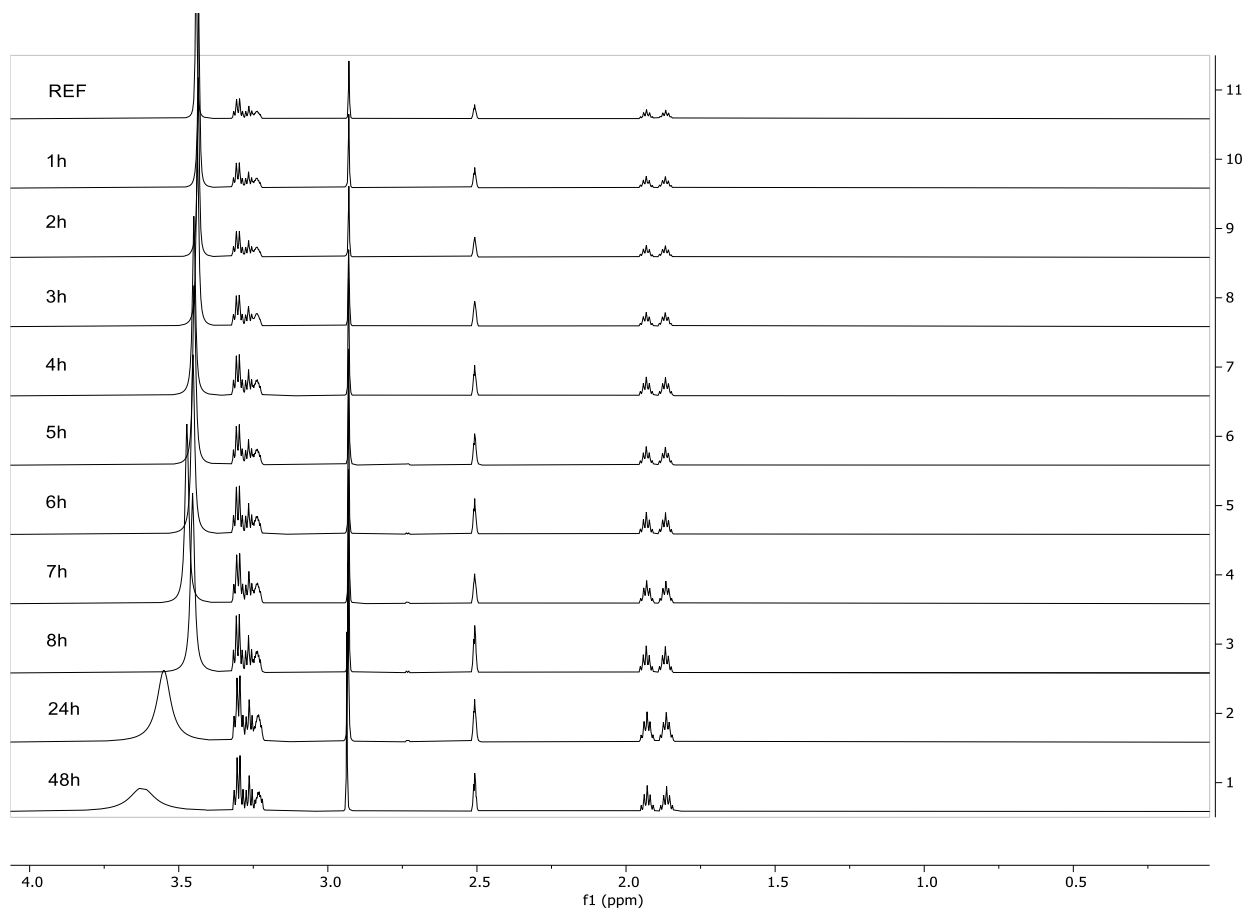

Figure S58 <sup>1</sup>H NMR 1 molar equivalent of [mTBDH][Cl<sub>2</sub>OAc], and 10 molar equivalents of water.

h. [mTBDH][Cl<sub>3</sub>OAc] + water

| Structure | Time | Integral N-Methyl | Integral HP | % HP |
|-----------|------|-------------------|-------------|------|
|           | REF  | 96335100.00       | 0.00        | 0.00 |
|           | 1h   | 110222000.00      | 0.00        | 0.00 |
|           | 2h   | 105830000.00      | 0.00        | 0.00 |
|           | 3h   | 104821000.00      | 0.00        | 0.00 |
|           | 4h   | 103922000.00      | 0.00        | 0.00 |
|           | 5h   | 102696000.00      | 0.00        | 0.00 |
|           | 6h   | 102966000.00      | 0.00        | 0.00 |
|           | 7h   | 116841000.00      | 0.00        | 0.00 |
|           | 8h   | 119564000.00      | 0.00        | 0.00 |
|           | 24h  | 96649800.00       | 0.00        | 0.00 |
|           | 48h  | 87251700.00       | 0.00        | 0.00 |

Table S59 1 molar equivalent of [mTBDH][Cl<sub>3</sub>OAc], and 0.2 molar equivalents of water.

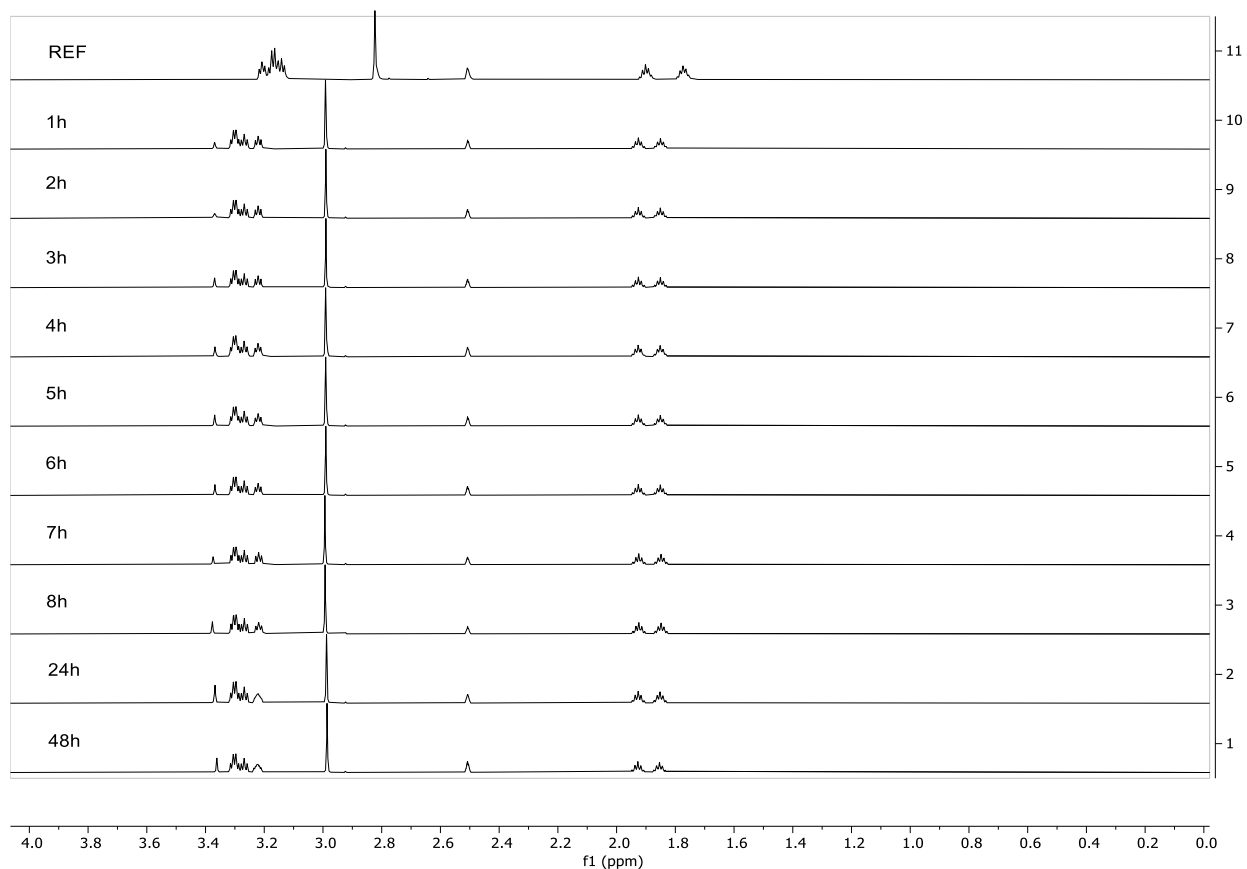

Figure S59  $^1\text{H}$  NMR 1 molar equivalent of  $[\text{mTBDH}][\text{Cl}_3\text{OAc}]$ , and 0.2 molar equivalents of water.

| Structure | Time | Integral N-Methyl | Integral HP | % HP |
|-----------|------|-------------------|-------------|------|
|           | REF  | 81627100.00       | 0.00        | 0.00 |
|           | 1    | 99403500.00       | 0.00        | 0.00 |
|           | 2    | 90889900.00       | 0.00        | 0.00 |
|           | 3    | 113107000.00      | 0.00        | 0.00 |
|           | 4    | 102479000.00      | 0.00        | 0.00 |
|           | 5    | 96517900.00       | 0.00        | 0.00 |
|           | 6    | 95205500.00       | 0.00        | 0.00 |
|           | 7    | 93837500.00       | 0.00        | 0.00 |
|           | 8    | 108069000.00      | 0.00        | 0.00 |
|           | 24   | 113480000.00      | 0.00        | 0.00 |
|           | 48   | 92516900.00       | 0.00        | 0.00 |

Table S60 1 molar equivalent of  $[\text{mTBDH}][\text{Cl}_3\text{OAc}]$ , and 0.5 molar equivalents of water.

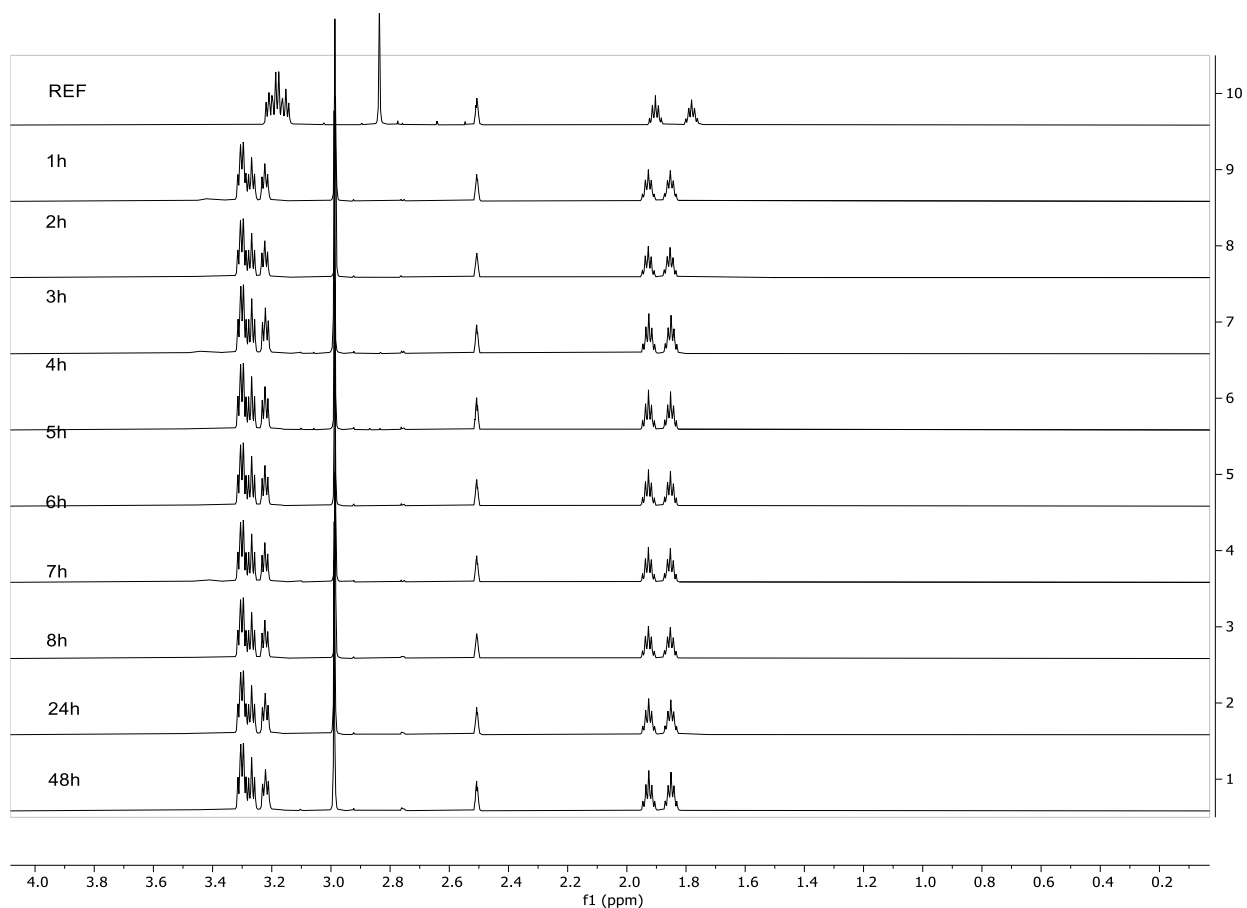

Figure S60 <sup>1</sup>H NMR 1 molar equivalent of [mTBDH][Cl<sub>3</sub>OAc], and 0.5 molar equivalents of water.

| Structure | Time | Integral N-Methyl | Integral HP | % HP |
|-----------|------|-------------------|-------------|------|
|           | REF  | 90018900.00       | 0.00        | 0.00 |
|           | 1h   | 100833000.00      | 0.00        | 0.00 |
|           | 2h   | 113748000.00      | 0.00        | 0.00 |
|           | 3h   | 94176000.00       | 0.00        | 0.00 |
|           | 4h   | 106493000.00      | 0.00        | 0.00 |
|           | 5h   | 103751000.00      | 0.00        | 0.00 |
|           | 6h   | 106153000.00      | 0.00        | 0.00 |
|           | 7h   | 118480000.00      | 0.00        | 0.00 |
|           | 8h   | 104895000.00      | 0.00        | 0.00 |
|           | 24h  | 110603000.00      | 0.00        | 0.00 |
|           | 48h  | 100934000.00      | 0.00        | 0.00 |

Table S61 1 molar equivalent of [mTBDH][Cl<sub>3</sub>OAc], and 1 molar equivalents of water.

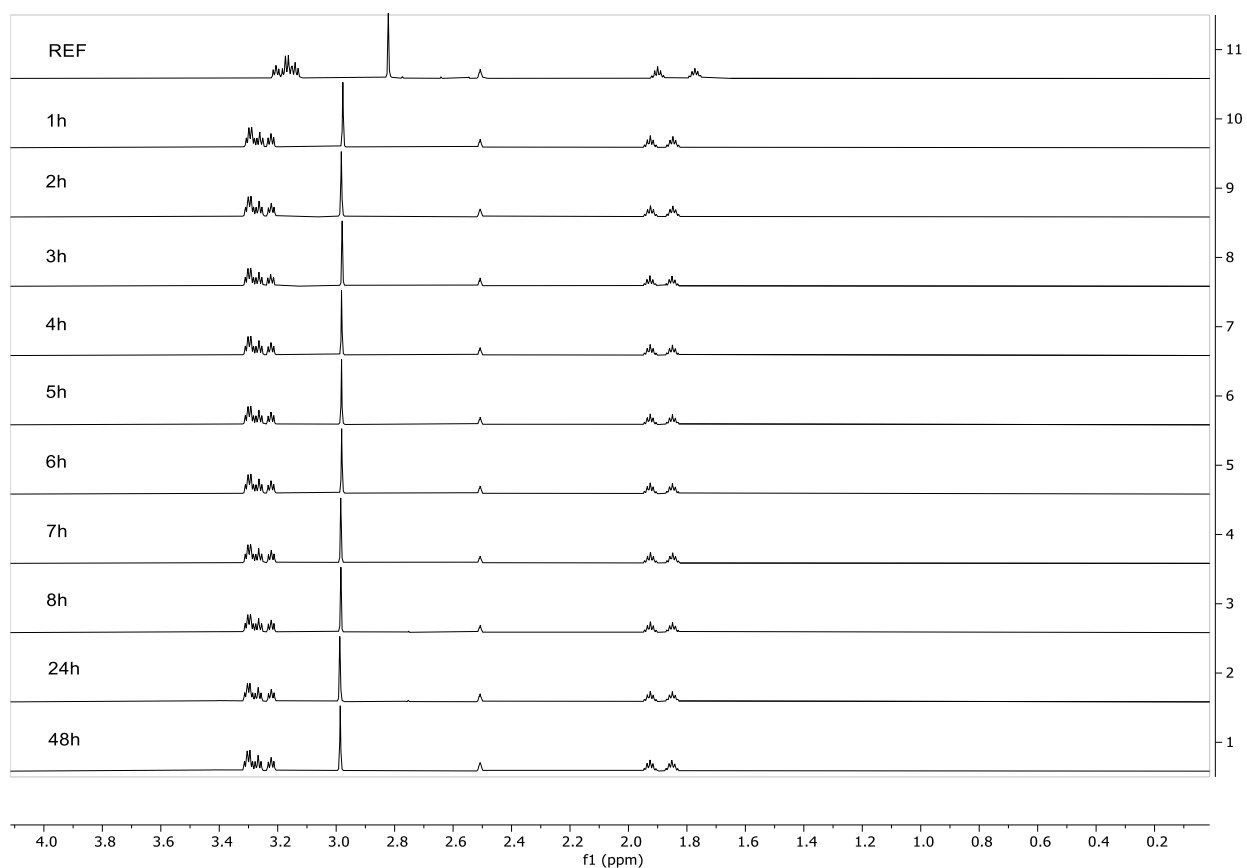

Figure S61  $^1\text{H}$  NMR 1 molar equivalent of [mTBDH][Cl<sub>3</sub>OAc], and 1 molar equivalents of water.

| Structure | Time | Integral N-Methyl | Integral HP | % HP |
|-----------|------|-------------------|-------------|------|
|           | REF  | 54843500.00       | 0.00        | 0.00 |
|           | 1h   | 75534200.00       | 0.00        | 0.00 |
|           | 2h   | 76088900.00       | 0.00        | 0.00 |
|           | 3h   | 74796200.00       | 0.00        | 0.00 |
|           | 4h   | 68778400.00       | 0.00        | 0.00 |
|           | 5h   | 66787400.00       | 0.00        | 0.00 |
|           | 6h   | 70216200.00       | 0.00        | 0.00 |
|           | 7h   | 72818500.00       | 0.00        | 0.00 |
|           | 8h   | 72453800.00       | 0.00        | 0.00 |
|           | 24h  | 77692700.00       | 0.00        | 0.00 |
|           | 48h  | 67356500.00       | 0.00        | 0.00 |

Table S62 1 molar equivalent of [mTBDH][Cl<sub>3</sub>OAc], and 5 molar equivalents of water.

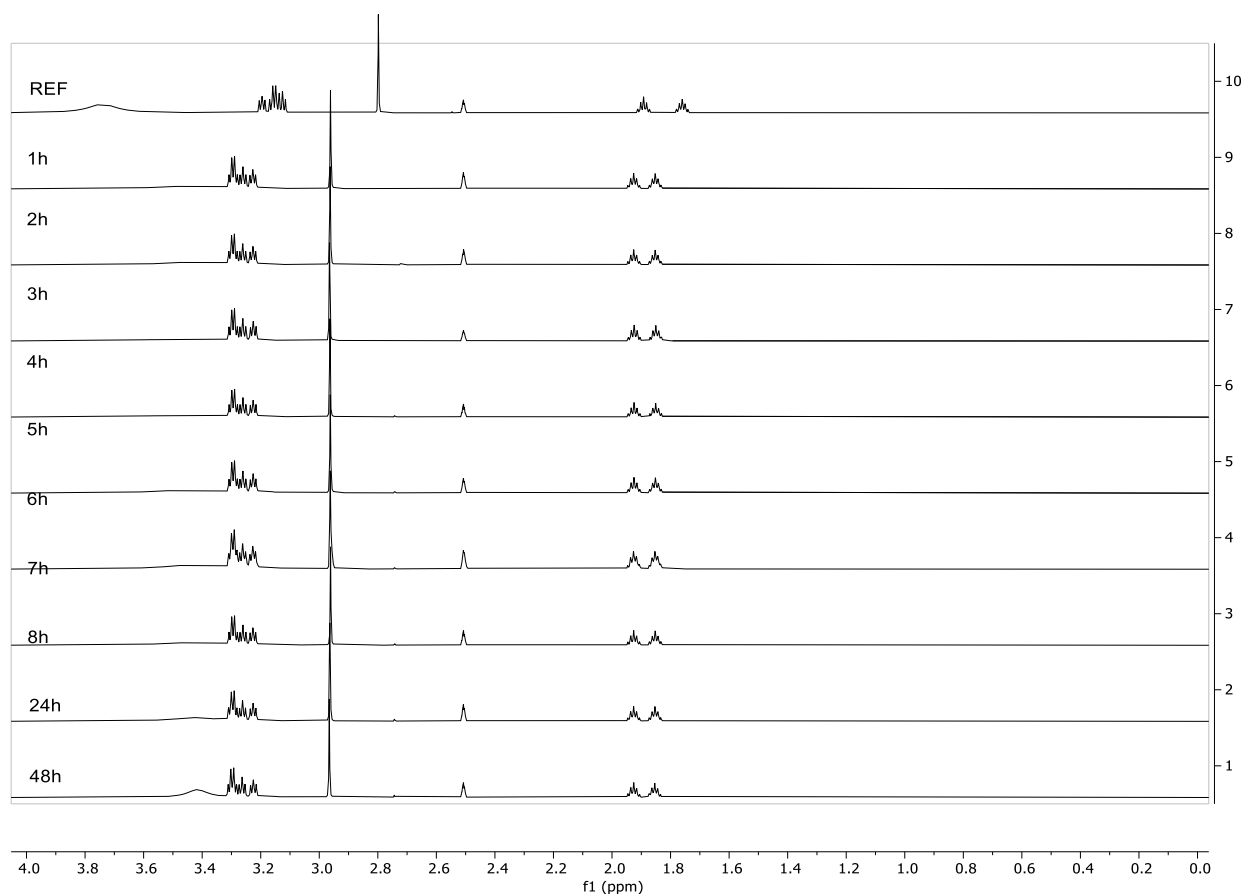

Figure S62  $^1\text{H}$  NMR 1 molar equivalent of  $[\text{mTBDH}][\text{Cl}_3\text{OAc}]$ , and 5 molar equivalents of water.

| Structure | Time | Integral N-Methyl | Integral HP | % HP |
|-----------|------|-------------------|-------------|------|
|           | REF  | 56061600.00       | 0.00        | 0.00 |
|           | 1h   | 71439800.00       | 0.00        | 0.00 |
|           | 2h   | 72501900.00       | 0.00        | 0.00 |
|           | 3h   | 77403300.00       | 0.00        | 0.00 |
|           | 4h   | 69895500.00       | 0.00        | 0.00 |
|           | 5h   | 76007300.00       | 0.00        | 0.00 |
|           | 6h   | 58829200.00       | 0.00        | 0.00 |
|           | 7h   | 68086700.00       | 0.00        | 0.00 |
|           | 8h   | 72990100.00       | 0.00        | 0.00 |
|           | 24h  | 70579600.00       | 0.00        | 0.00 |
|           | 48h  | 67356500.00       | 0.00        | 0.00 |

Table S63 1 molar equivalent of  $[\text{mTBDH}][\text{Cl}_3\text{OAc}]$ , and 10 molar equivalents of water.

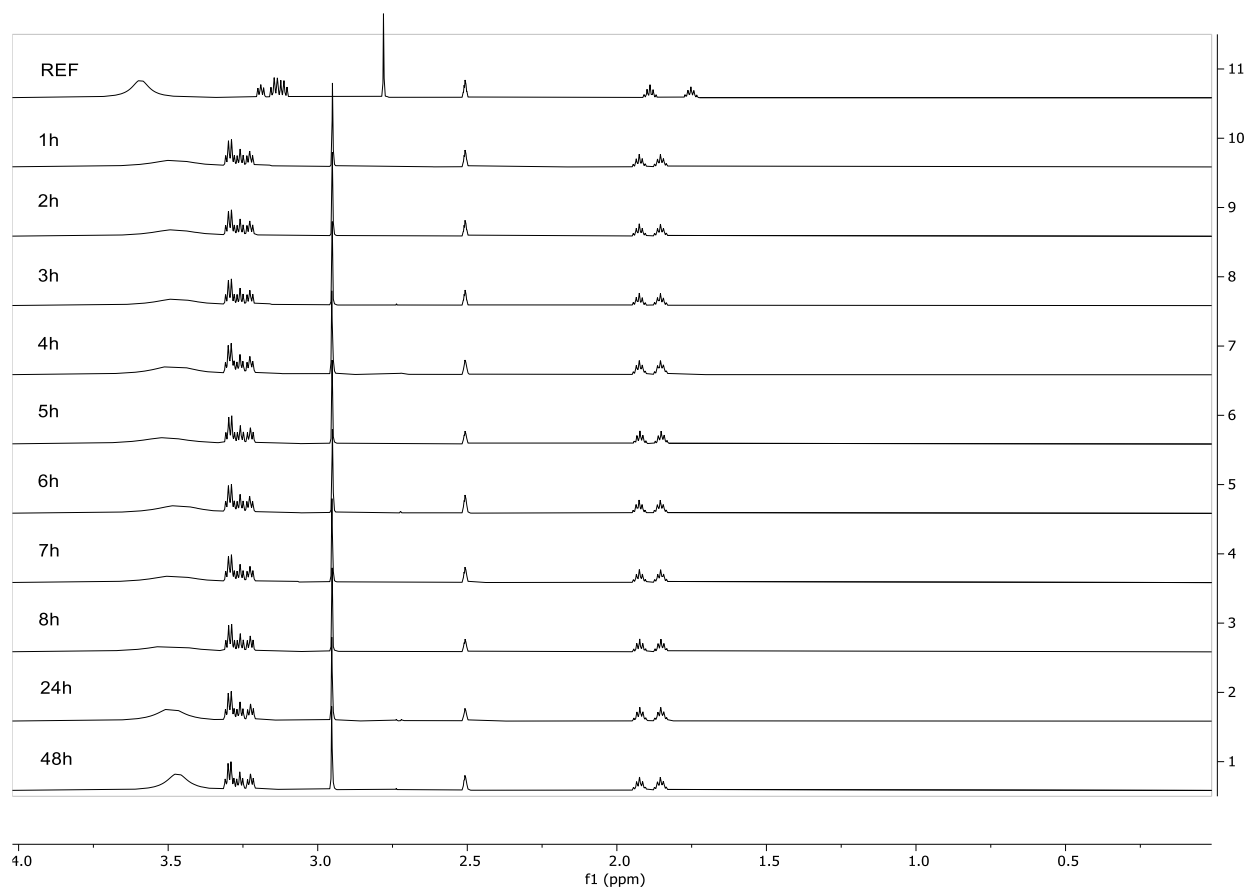

Figure S63 <sup>1</sup>H NMR 1 molar equivalent of [mTBDH][Cl<sub>3</sub>OAc], and 10 molar equivalents of water.

### 3. mTBN

a. mTBN + water over 48h at 90°C.

| Structure | Time | Integral N-Methyl 1 | Integral N-Methyl 2 | Integral N-Methyl total | Integral HP 1 | Integral HP 2 | Integral HP Total | % HP |
|-----------|------|---------------------|---------------------|-------------------------|---------------|---------------|-------------------|------|
|           | REF  | 298091000.00        | 195578000.00        | 493669000.00            | 55132.70      | 1681960.00    | 1737092.70        | 0.00 |
|           | 1h   | 349551000.00        | 230791000.00        | 580342000.00            | 481570.00     | 1864300.00    | 2345870.00        | 0.40 |
|           | 2h   | 298004000.00        | 196620000.00        | 494624000.00            | 438015.00     | 1731190.00    | 2169205.00        | 0.44 |
|           | 3h   | 338630000.00        | 222949000.00        | 561579000.00            | 685109.00     | 2071850.00    | 2756959.00        | 0.49 |
|           | 4h   | 320946000.00        | 212222000.00        | 533168000.00            | 1053340.00    | 2011020.00    | 3064360.00        | 0.57 |
|           | 5h   | 255585000.00        | 169078000.00        | 424663000.00            | 663843.00     | 1792650.00    | 2456493.00        | 0.58 |
|           | 6h   | 252087000.00        | 166595000.00        | 418682000.00            | 1128170.00    | 1634740.00    | 2762910.00        | 0.66 |
|           | 7h   | 269936000.00        | 178838000.00        | 448774000.00            | 1911480.00    | 2053020.00    | 3964500.00        | 0.88 |
|           | 8h   | 219878000.00        | 145905000.00        | 365783000.00            | 1626550.00    | 1651060.00    | 3277610.00        | 0.89 |
|           | 24h  | 245837000.00        | 167868000.00        | 413705000.00            | 7777580.00    | 3859430.00    | 11637010.00       | 2.74 |
|           | 48h  | 89825800.00         | 63212800.00         | 153038600.00            | 5541390.00    | 2298140.00    | 7839530.00        | 4.87 |

Table S64 1 molar equivalent of mTBN and 0.2 molar equivalents of water.



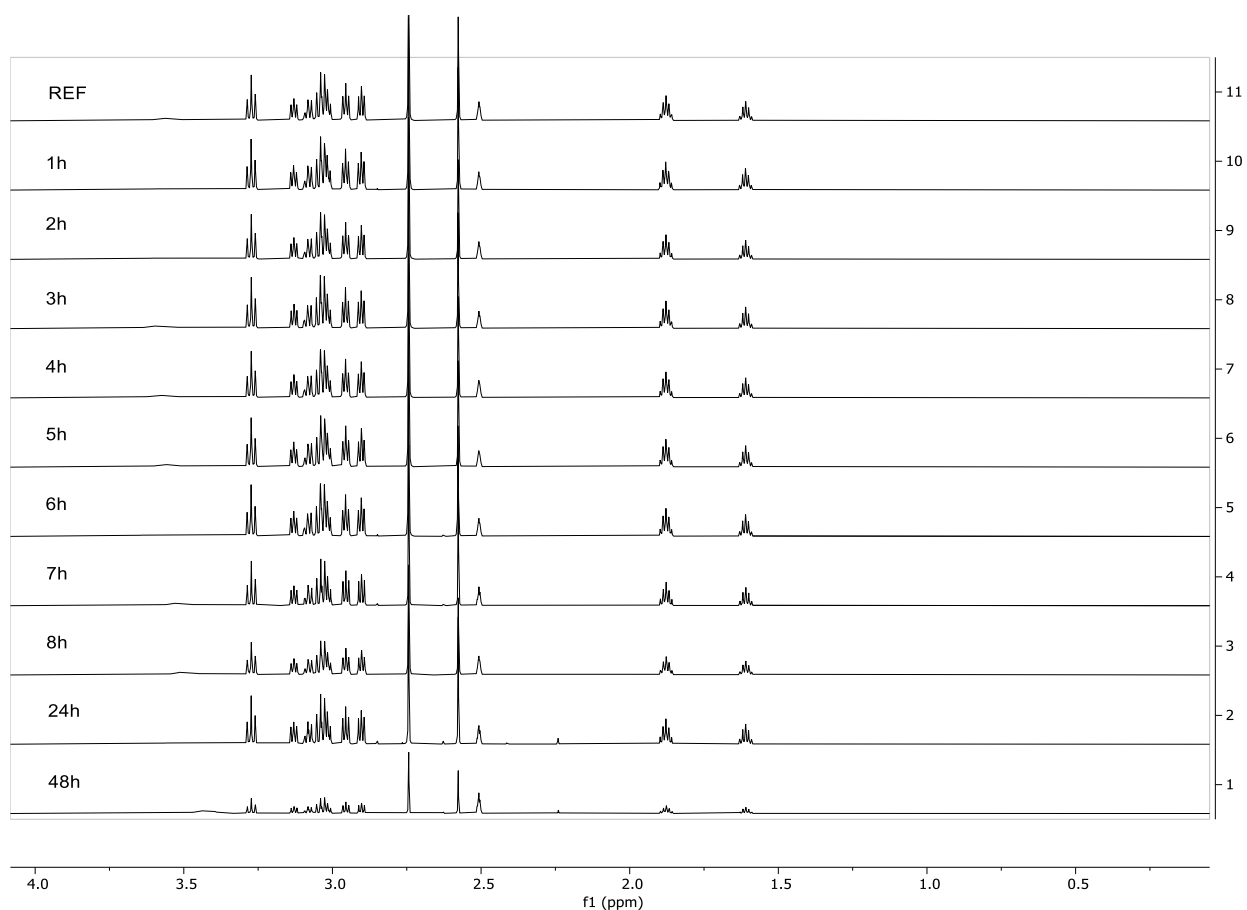

Figure S64  $^1\text{H}$  NMR 1 molar equivalent of *mTBN* and 0.2 molar equivalents of water.

| Structure | Time | Integral N-Methyl 1 | Integral N-Methyl 2 | Integral N Methyl total | Integral HP 1 | Integral HP 2 | Integral HP Total | % HP  |
|-----------|------|---------------------|---------------------|-------------------------|---------------|---------------|-------------------|-------|
|           | REF  | 280048000.00        | 184077000.00        | 464125000.00            | 273318.00     | 1754780.00    | 2028098.00        | 0.00  |
|           | 1h   | 73777000.00         | 49340300.00         | 123117300.00            | 412100.00     | 556470.00     | 968570.00         | 0.78  |
|           | 2h   | 236071000.00        | 157586000.00        | 393657000.00            | 2255510.00    | 2202360.00    | 4457870.00        | 1.12  |
|           | 3h   | 314600000.00        | 210682000.00        | 525282000.00            | 3884350.00    | 3312120.00    | 7196470.00        | 1.35  |
|           | 4h   | 321153000.00        | 215468000.00        | 536621000.00            | 5746180.00    | 3586550.00    | 9332730.00        | 1.71  |
|           | 5h   | 231491000.00        | 155993000.00        | 387484000.00            | 4844040.00    | 3214270.00    | 8058310.00        | 2.04  |
|           | 6h   | 275714000.00        | 186703000.00        | 462417000.00            | 7491140.00    | 4074990.00    | 11566130.00       | 2.44  |
|           | 7h   | 193207000.00        | 130011000.00        | 323218000.00            | 6540140.00    | 2733420.00    | 9273560.00        | 2.79  |
|           | 8h   | 226046000.00        | 154146000.00        | 380192000.00            | 8815560.00    | 3968070.00    | 12783630.00       | 3.25  |
|           | 24h  | 282851000.00        | 204179000.00        | 487030000.00            | 37986600.00   | 16388900.00   | 54375500.00       | 10.04 |
|           | 48h  | 54085500.00         | 41427500.00         | 95513000.00             | 13528400.00   | 5689460.00    | 19217860.00       | 16.75 |

Table S65 1 molar equivalent of *mTBN* and 0.5 molar equivalents of water.

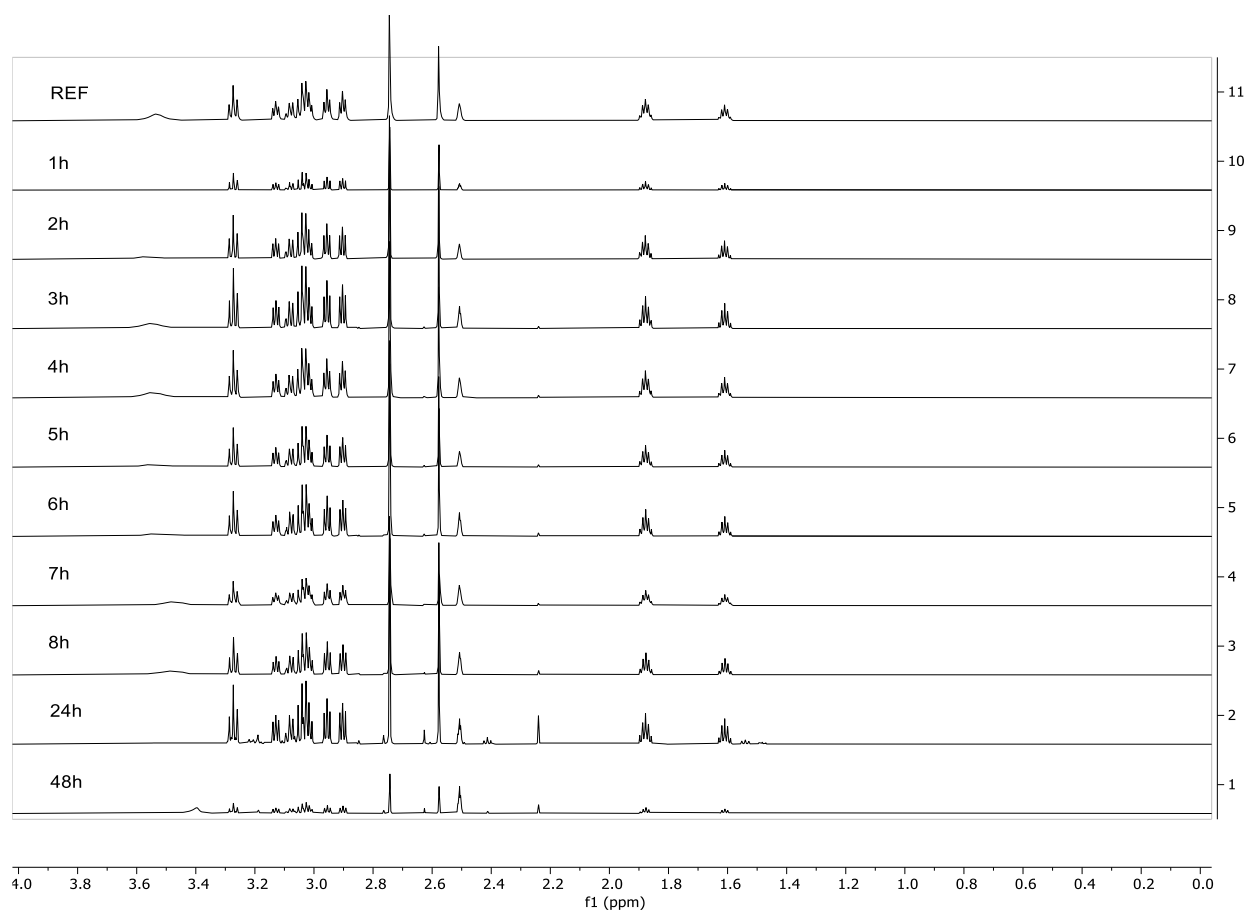

Figure S65  $^1\text{H}$  NMR 1 molar equivalent of *mTBN* and 0.5 molar equivalents of water.

| Structure | Time | Integral N-Methyl 1 | Integral N-Methyl 2 | Integral N Methyl total | Integral HP 1 | Integral HP 2 | Integral HP Total | % HP  |
|-----------|------|---------------------|---------------------|-------------------------|---------------|---------------|-------------------|-------|
|           | REF  | 274171000.00        | 181770000.00        | 455941000.00            | 129767.00     | 1619550.00    | 1749317.00        | 0.00  |
|           | 1h   | 315067000.00        | 210657000.00        | 525724000.00            | 3739540.00    | 3461060.00    | 7200600.00        | 1.35  |
|           | 2h   | 291983000.00        | 195666000.00        | 487649000.00            | 6321530.00    | 5067400.00    | 11388930.00       | 2.28  |
|           | 3h   | 238699000.00        | 161101000.00        | 399800000.00            | 9190270.00    | 5926340.00    | 15116610.00       | 3.64  |
|           | 4h   | 205631000.00        | 138475000.00        | 344106000.00            | 8998240.00    | 6219860.00    | 15218100.00       | 4.24  |
|           | 5h   | 283644000.00        | 191512000.00        | 475156000.00            | 15491300.00   | 10727900.00   | 26219200.00       | 5.23  |
|           | 6h   | 196895000.00        | 132209000.00        | 329104000.00            | 12935500.00   | 9070740.00    | 22006240.00       | 6.27  |
|           | 7h   | 218589000.00        | 148718000.00        | 367307000.00            | 17576600.00   | 12153300.00   | 29729900.00       | 7.49  |
|           | 8h   | 260152000.00        | 177942000.00        | 438094000.00            | 24233400.00   | 16371800.00   | 40605200.00       | 8.48  |
|           | 24h  | 201303000.00        | 144169000.00        | 345472000.00            | 63328200.00   | 45229100.00   | 108557300.00      | 23.91 |
|           | 48h  | 92316800.00         | 68213900.00         | 160530700.00            | 49917400.00   | 30050600.00   | 79968000.00       | 33.25 |

Table S66 1 molar equivalent of *mTBN* and 1 molar equivalent of water.

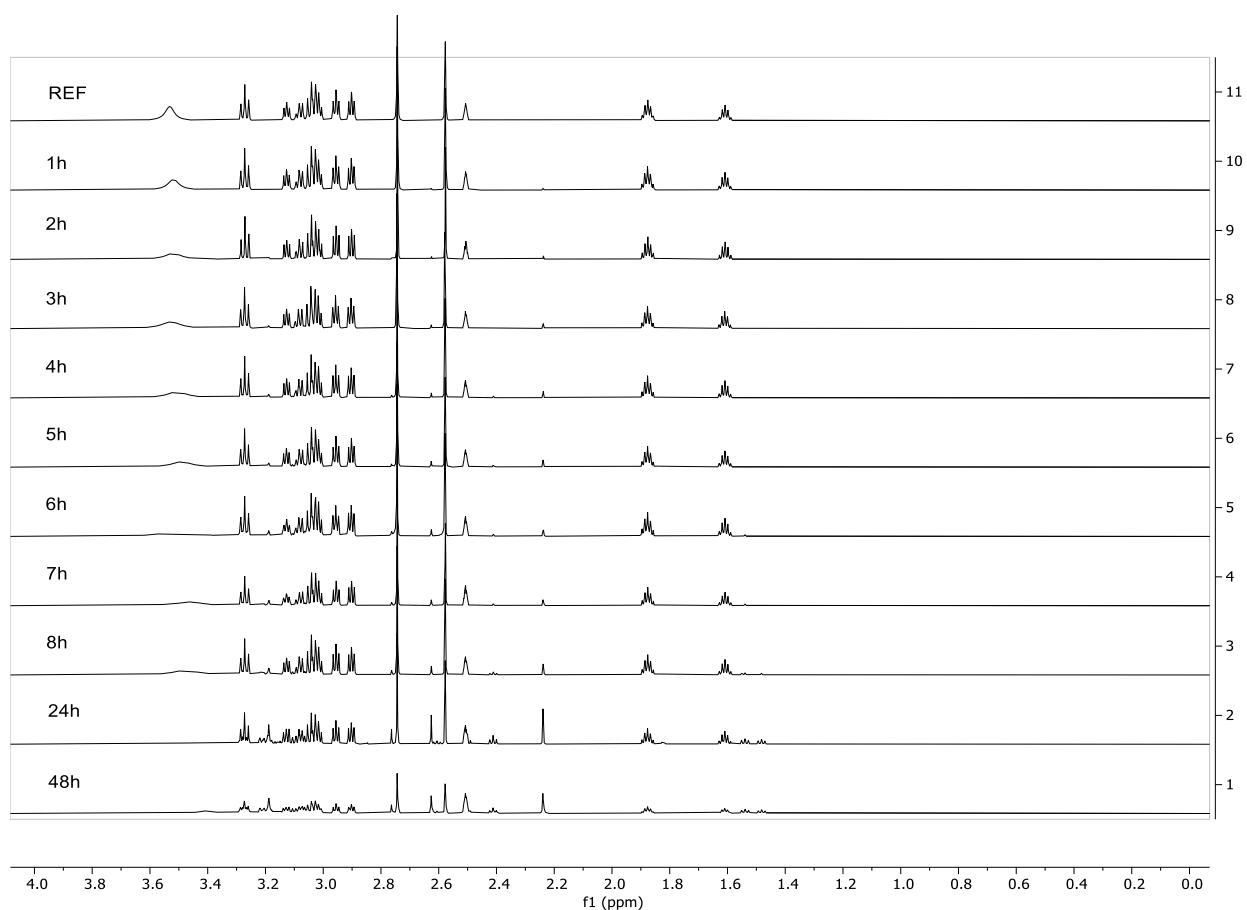

Figure S66  $^1\text{H}$  NMR 1 molar equivalent of *mTBN* and 0.5 molar equivalents of water.

| Structure | HT_21 | Integral N-Methyl 1 | Integral N-Methyl 2 | Integral N Methyl total | Integral HP 1 | Integral HP 2 | Integral HP Total | % HP  |
|-----------|-------|---------------------|---------------------|-------------------------|---------------|---------------|-------------------|-------|
|           | REF   | 137447000.00        | 101702000.00        | 239149000.00            | 130896.00     | 512611.00     | 643507.00         | 0.00  |
|           | 1h    | 103803000.00        | 109633000.00        | 213436000.00            | 88630200.00   | 16830800.00   | 105461000.00      | 33.07 |
|           | 2h    | 53692600.00         | 72153100.00         | 125845700.00            | 91262600.00   | 20134600.00   | 111397200.00      | 46.95 |
|           | 3h    | 46352600.00         | 86280500.00         | 132633100.00            | 146363000.00  | 33586200.00   | 179949200.00      | 57.57 |
|           | 4h    | 7882830.00          | 33269500.00         | 41152330.00             | 56006000.00   | 20942000.00   | 76948000.00       | 65.15 |
|           | 5h    | 21653800.00         | 53793400.00         | 75447200.00             | 116365000.00  | 29775700.00   | 146140700.00      | 65.95 |
|           | 6h    | 13787100.00         | 47165300.00         | 60952400.00             | 119044000.00  | 32524400.00   | 151568400.00      | 71.32 |
|           | 7h    | 3069770.00          | 24563900.00         | 27633670.00             | 81868800.00   | 29166300.00   | 111035100.00      | 80.07 |
|           | 8h    | 5801680.00          | 31334000.00         | 37135680.00             | 112207000.00  | 37744700.00   | 149951700.00      | 80.15 |
|           | 24h   | 770444.00           | 28201500.00         | 28971944.00             | 223388000.00  | 93140000.00   | 316528000.00      | 91.61 |
|           | 48h   | 65510.60            | 831274.00           | 896784.60               | 57911100.00   | 25160100.00   | 83071200.00       | 98.93 |

Table S67 1 molar equivalent of *mTBN* and 5 molar equivalents of water.

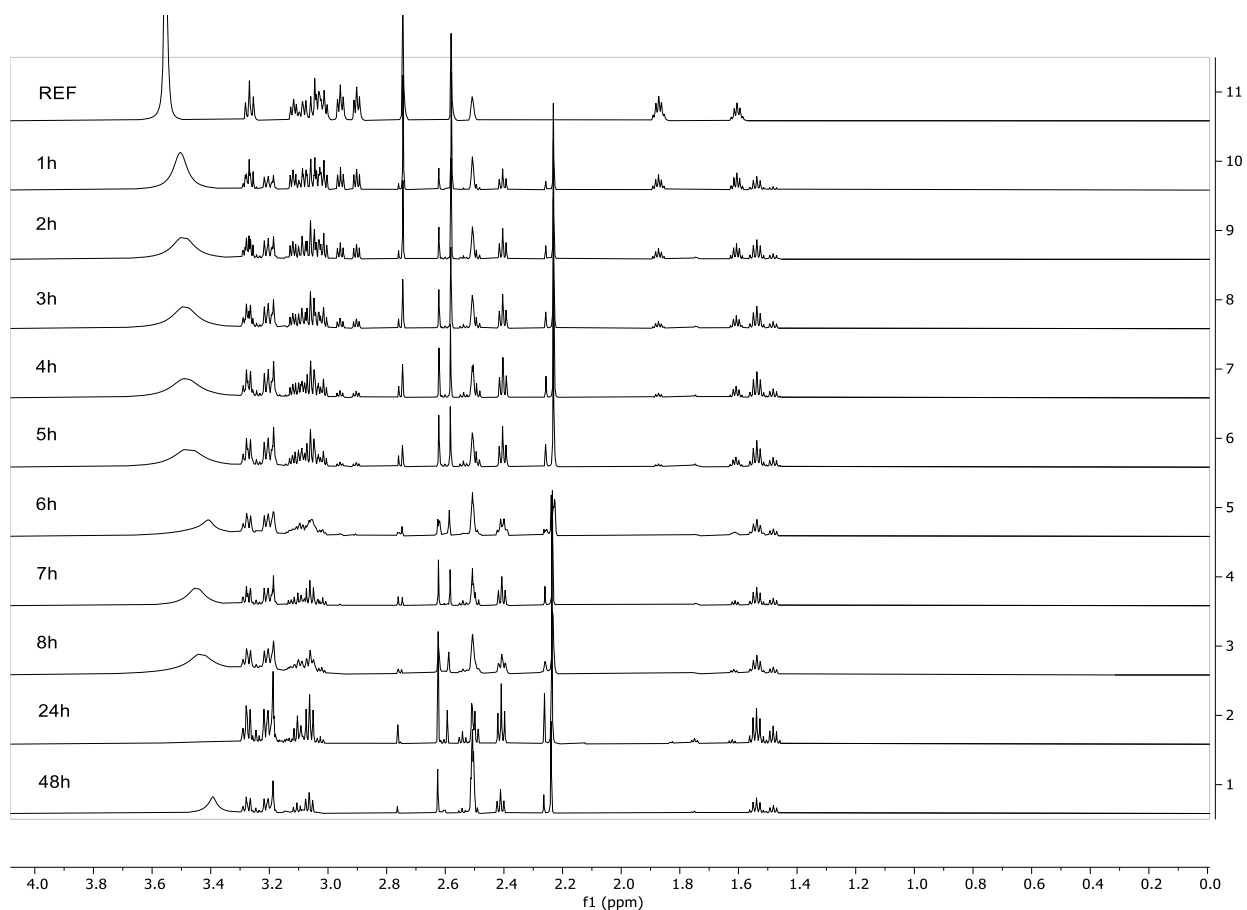

Figure S67  $^1\text{H}$  NMR 1 molar equivalent of mTBN and 5 molar equivalents of water.

| Structure | Time | Integral N-Methyl 1 | Integral N-Methyl 2 | Integral N Methyl total | Integral HP 1 | Integral HP 2 | Integral HP Total | % HP  |
|-----------|------|---------------------|---------------------|-------------------------|---------------|---------------|-------------------|-------|
|           | REF  | 69744700.00         | 32482300.00         | 102227000.00            | 277544.00     | 1021180.00    | 1298724.00        | 0.00  |
|           | 1h   | 49150000.00         | 23760600.00         | 72910600.00             | 79668200.00   | 21413300.00   | 101081500.00      | 58.10 |
|           | 2h   | 38374300.00         | 13062900.00         | 51437200.00             | 100278000.00  | 30951800.00   | 131229800.00      | 71.84 |
|           | 3h   | 28816900.00         | 6446250.00          | 35263150.00             | 110950000.00  | 38198000.00   | 149148000.00      | 80.88 |
|           | 4h   | 25939600.00         | 2309950.00          | 28249550.00             | 147285000.00  | 56498000.00   | 203783000.00      | 87.83 |
|           | 5h   | 5710880.00          | 1575720.00          | 7286600.00              | 112341000.00  | 46091100.00   | 158432100.00      | 95.60 |
|           | 6h   | 5866360.00          | 3192210.00          | 9058570.00              | 143775000.00  | 69839300.00   | 213614300.00      | 95.93 |
|           | 7h   | 4326910.00          | 1391270.00          | 5718180.00              | 224374000.00  | 104998000.00  | 329372000.00      | 98.29 |
|           | 8h   | 2304490.00          | 1082220.00          | 3386710.00              | 99774800.00   | 48548300.00   | 148323100.00      | 97.77 |
|           | 24h  | 5488030.00          | 1701960.00          | 7189990.00              | 136252000.00  | 65773200.00   | 202025200.00      | 96.56 |
|           | 48h  | 5080660.00          | 1391270.00          | 6471930.00              | 227558000.00  | 104610000.00  | 332168000.00      | 98.09 |

Table S68 1 molar equivalent of mTBN and 10 molar equivalents of water.

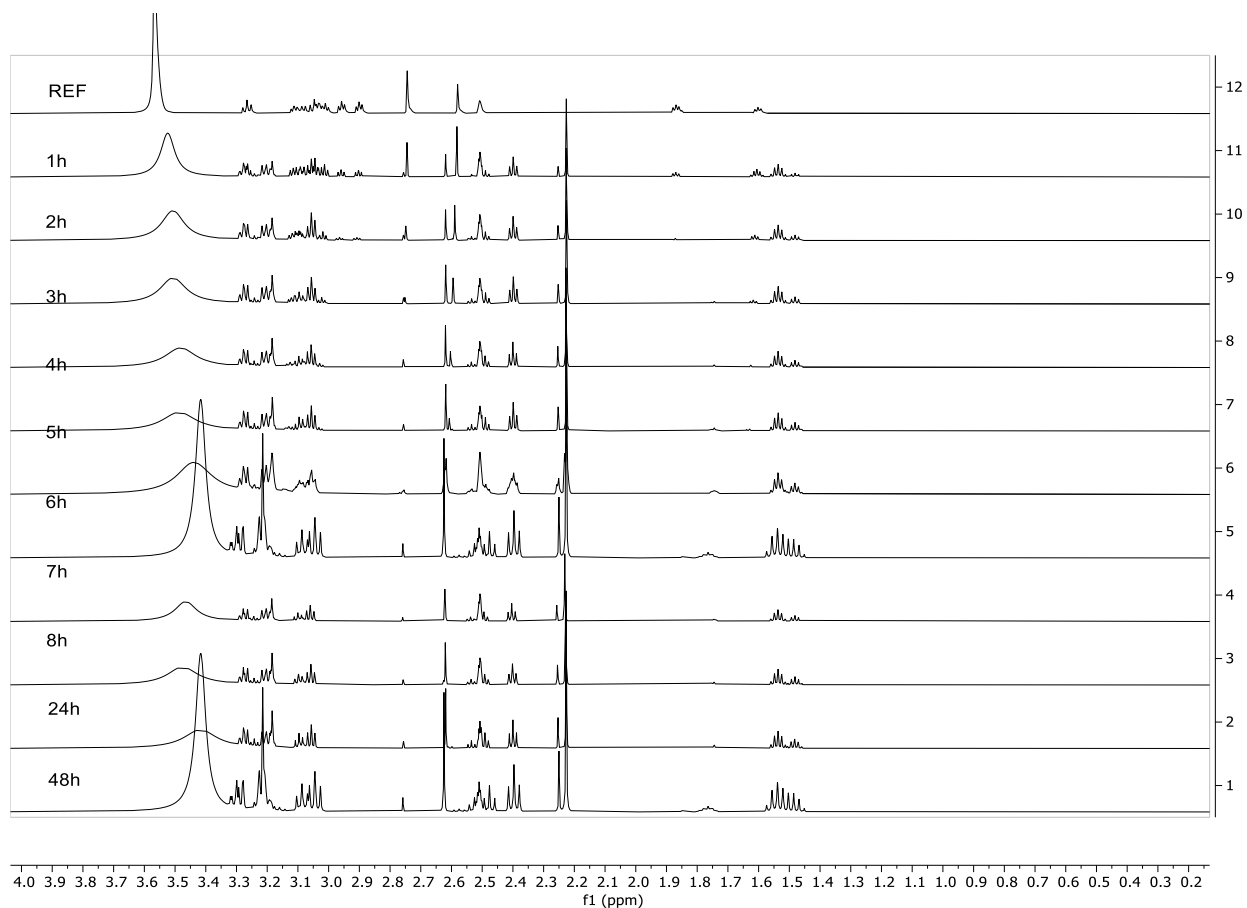

Figure S68 <sup>1</sup>H NMR 1 molar equivalent of mTBN and 10 molar equivalents of water.

b. mTBN + water over 12 days at 70°C.

| Structure | Time    | Integral N-Methyl 1 | Integral N-Methyl 2 | Integral N-Methyl total | Integral HP 1 | Integral HP 2 | Integral HP Total | % HP  |
|-----------|---------|---------------------|---------------------|-------------------------|---------------|---------------|-------------------|-------|
|           | 3 days  | 42122700.00         | 30666200.00         | 72788900.00             | 4485920.00    | 3247540.00    | 7733460.00        | 0.00  |
|           | 6 days  | 51387400.00         | 40088700.00         | 91476100.00             | 12080100.00   | 7988440.00    | 20068540.00       | 17.99 |
|           | 9 days  | 36534600.00         | 30708400.00         | 67243000.00             | 13176000.00   | 8689920.00    | 21865920.00       | 24.54 |
|           | 12 days | 35435900.00         | 31295100.00         | 66731000.00             | 15970600.00   | 10529300.00   | 26499900.00       | 28.42 |

Table S69 1 molar equivalent of mTBN and 1 molar equivalents of water.

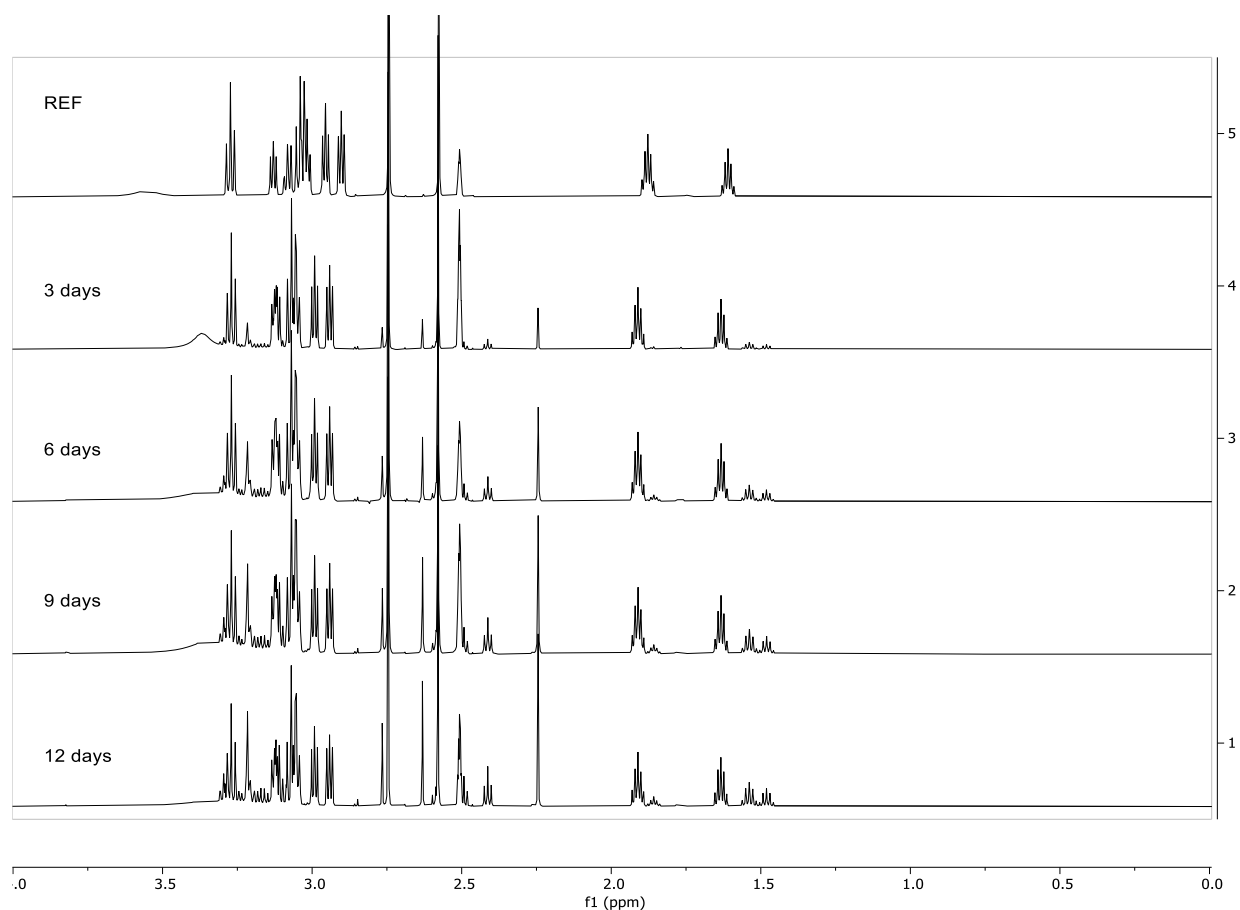

Figure S69 <sup>1</sup>H NMR 1 molar equivalent of mTBN and 1 molar equivalents of water.

| Structure | Time    | Integral N-Methyl 1 | Integral N-Methyl 2 | Integral N-Methyl total | Integral HP 1 | Integral HP 2 | Integral HP Total | % HP  |
|-----------|---------|---------------------|---------------------|-------------------------|---------------|---------------|-------------------|-------|
|           | 3 days  | 8964480.00          | 1150710.00          | 10115190.00             | 49062000.00   | 16027000.00   | 65089000.00       | 0.00  |
|           | 6 days  | 4074290.00          | 377125.00           | 4451415.00              | 51339100.00   | 18715700.00   | 70054800.00       | 94.03 |
|           | 9 days  | 2134300.00          | 114464.00           | 2248764.00              | 49210300.00   | 18962200.00   | 68172500.00       | 96.81 |
|           | 12 days | 588394.00           | 267989.00           | 856383.00               | 59995400.00   | 24959200.00   | 84954600.00       | 99.00 |

Table S70 1 molar equivalent of mTBN and 5 molar equivalents of water.

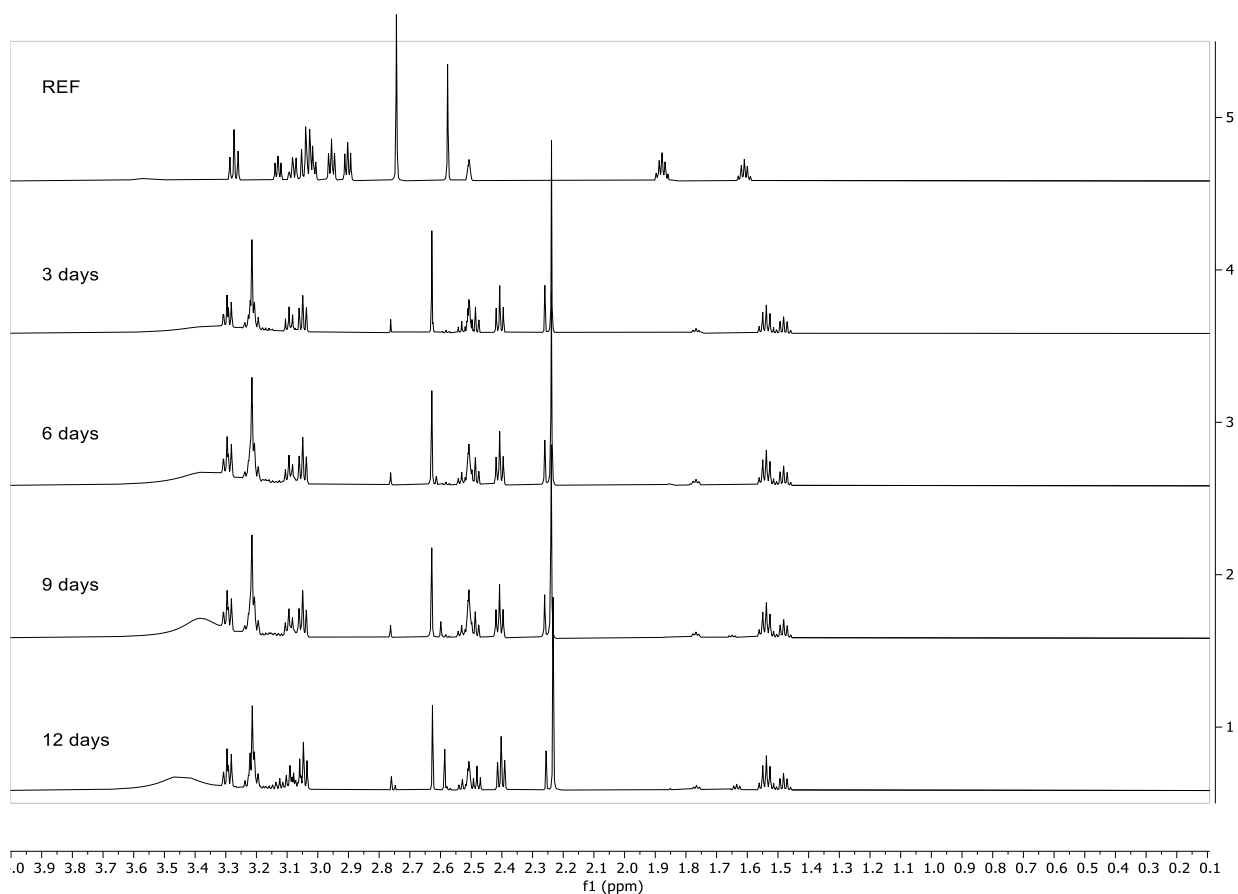

Figure S70  $^1\text{H}$  NMR 1 molar equivalent of mTBN and 5 molar equivalents of water.

| Structure | Time    | Integral N-Methyl 1 | Integral N-Methyl 2 | Integral N Methyl total | Integral HP 1 | Integral HP 2 | Integral HP Total | % HP   |
|-----------|---------|---------------------|---------------------|-------------------------|---------------|---------------|-------------------|--------|
|           | 3 days  | 0.00                | 0.00                | 0.00                    | 14865900.00   | 37827400.00   | 52693300.00       | 0.00   |
|           | 6 days  | 0.00                | 0.00                | 0.00                    | 14774800.00   | 38572800.00   | 53347600.00       | 100.00 |
|           | 9 days  | 0.00                | 0.00                | 0.00                    | 11135400.00   | 28766100.00   | 39901500.00       | 100.00 |
|           | 12 days | 0.00                | 0.00                | 0.00                    | 14762000.00   | 37944700.00   | 52706700.00       | 100.00 |

Table S71 1 molar equivalent of mTBN and 10 molar equivalents of water.

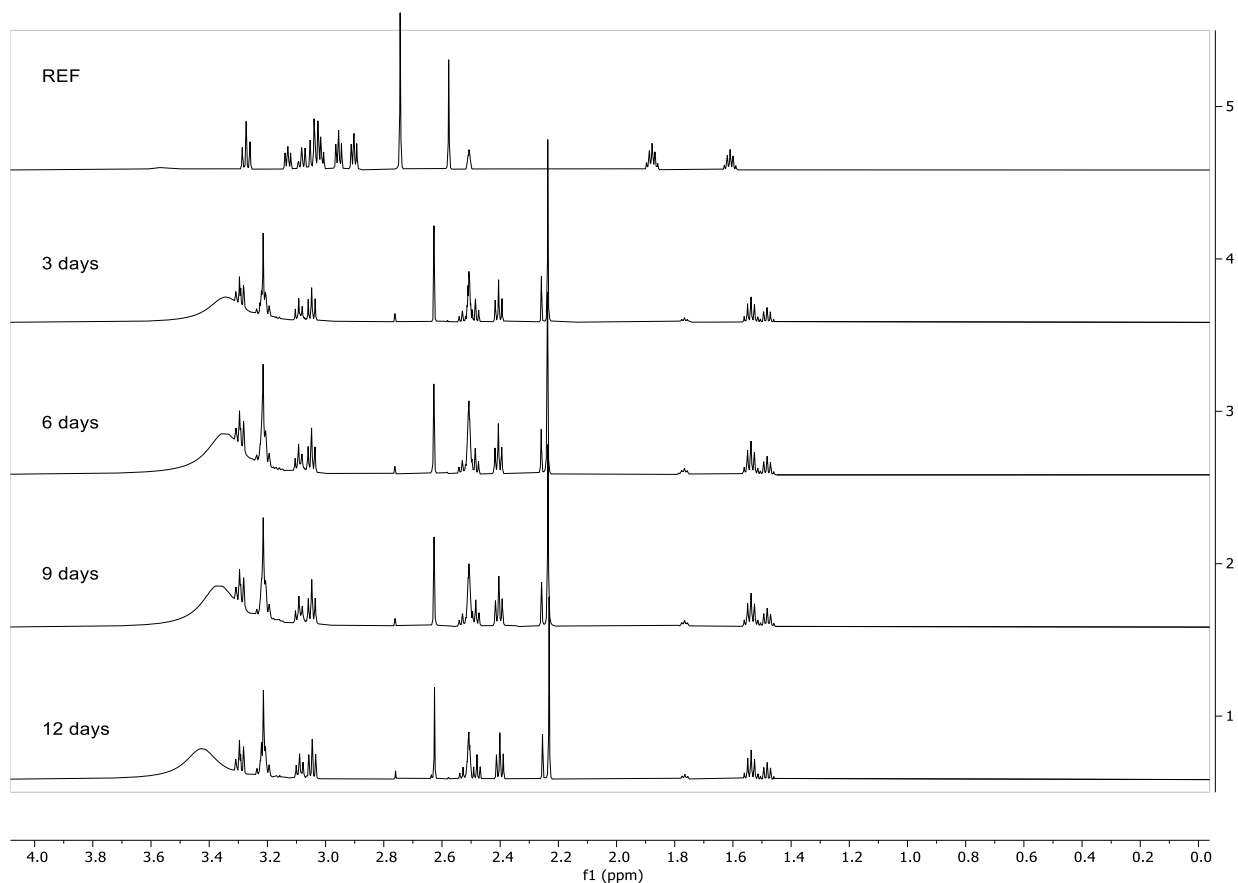

Figure S71  $^1\text{H}$  NMR 1 molar equivalent of *mTBN* and 10 molar equivalents of water.

c. *mTBN* + water over 12 days at  $90^\circ\text{C}$ .

| Structure | Time    | integral N-Methyl 1 | integral N-Methyl 2 | integral N-Methyl total | integral HP 1 | integral HP 2 | integral HP Total | % HP  |
|-----------|---------|---------------------|---------------------|-------------------------|---------------|---------------|-------------------|-------|
|           | 3 days  | 23842200.00         | 29305100.00         | 53147300.00             | 20631500.00   | 15517900.00   | 36149400.00       | 0.00  |
|           | 6 days  | 19722700.00         | 21872200.00         | 41594900.00             | 31151000.00   | 23394600.00   | 54545600.00       | 56.74 |
|           | 9 days  | 15981600.00         | 16093100.00         | 32074700.00             | 33268700.00   | 25196300.00   | 58465000.00       | 64.57 |
|           | 12 days | 14027900.00         | 12235800.00         | 26263700.00             | 33432900.00   | 26403900.00   | 59836800.00       | 69.50 |

Table S72 1 molar equivalent of *mTBN* and 1 molar equivalents of water.



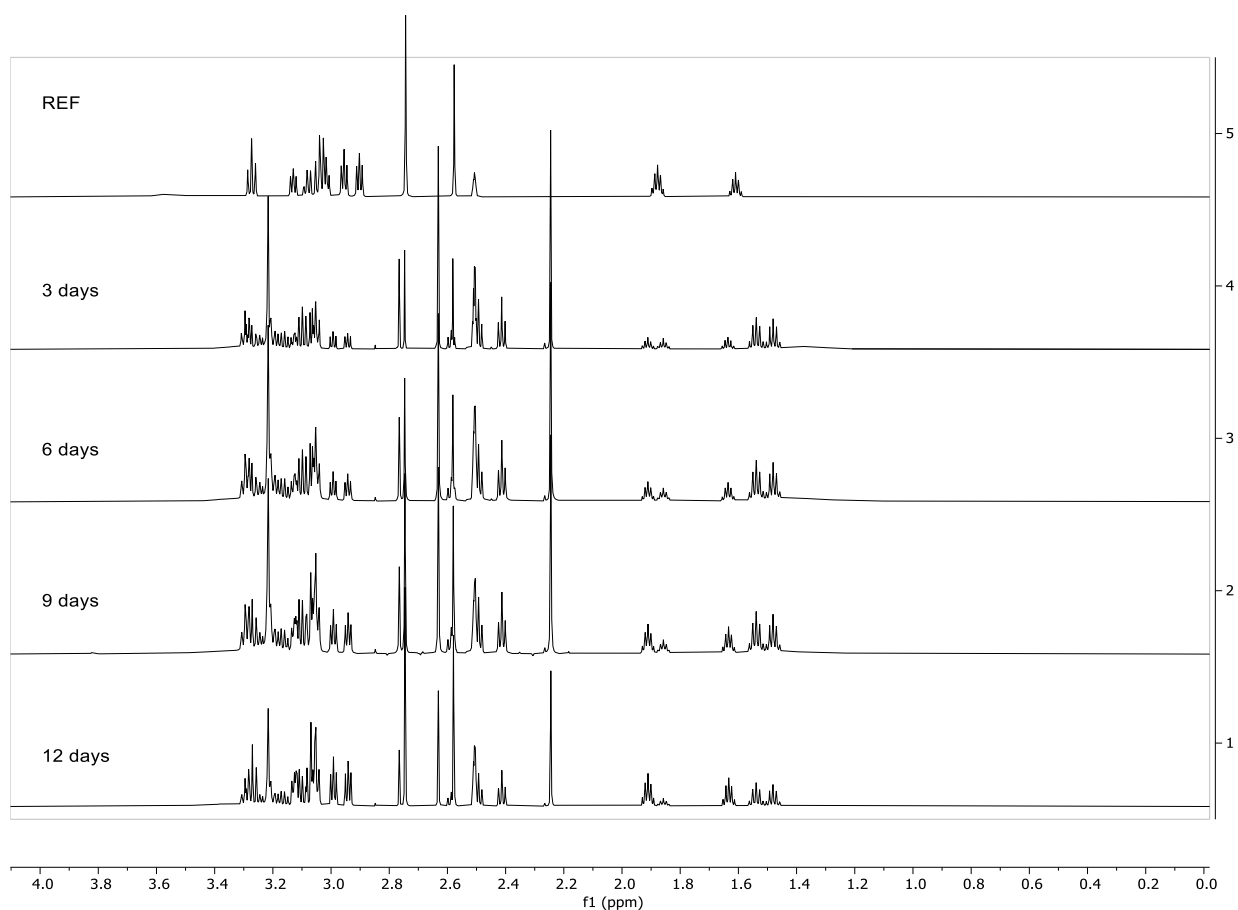

Figure S72  $^1\text{H}$  NMR 1 molar equivalent of *mTBN* and 1 molar equivalents of water.

| Structure | HT_67   | Integral N-Methyl 1 | Integral N-Methyl 2 | Integral N Methyl total | Integral HP 1 | Integral HP 2 | Integral HP Total | % HP   |
|-----------|---------|---------------------|---------------------|-------------------------|---------------|---------------|-------------------|--------|
|           | 3 days  | 0.00                | 0.00                | 0.00                    | 61522200.00   | 26043300.00   | 87565500.00       | 0.00   |
|           | 6 days  | 0.00                | 0.00                | 0.00                    | 47064700.00   | 19365500.00   | 66430200.00       | 100.00 |
|           | 9 days  | 0.00                | 0.00                | 0.00                    | 57465100.00   | 24332200.00   | 81797300.00       | 100.00 |
|           | 12 days | 0.00                | 0.00                | 0.00                    | 50824700.00   | 21528700.00   | 72353400.00       | 100.00 |

Table S73 1 molar equivalent of *mTBN* and 5 molar equivalents of water.

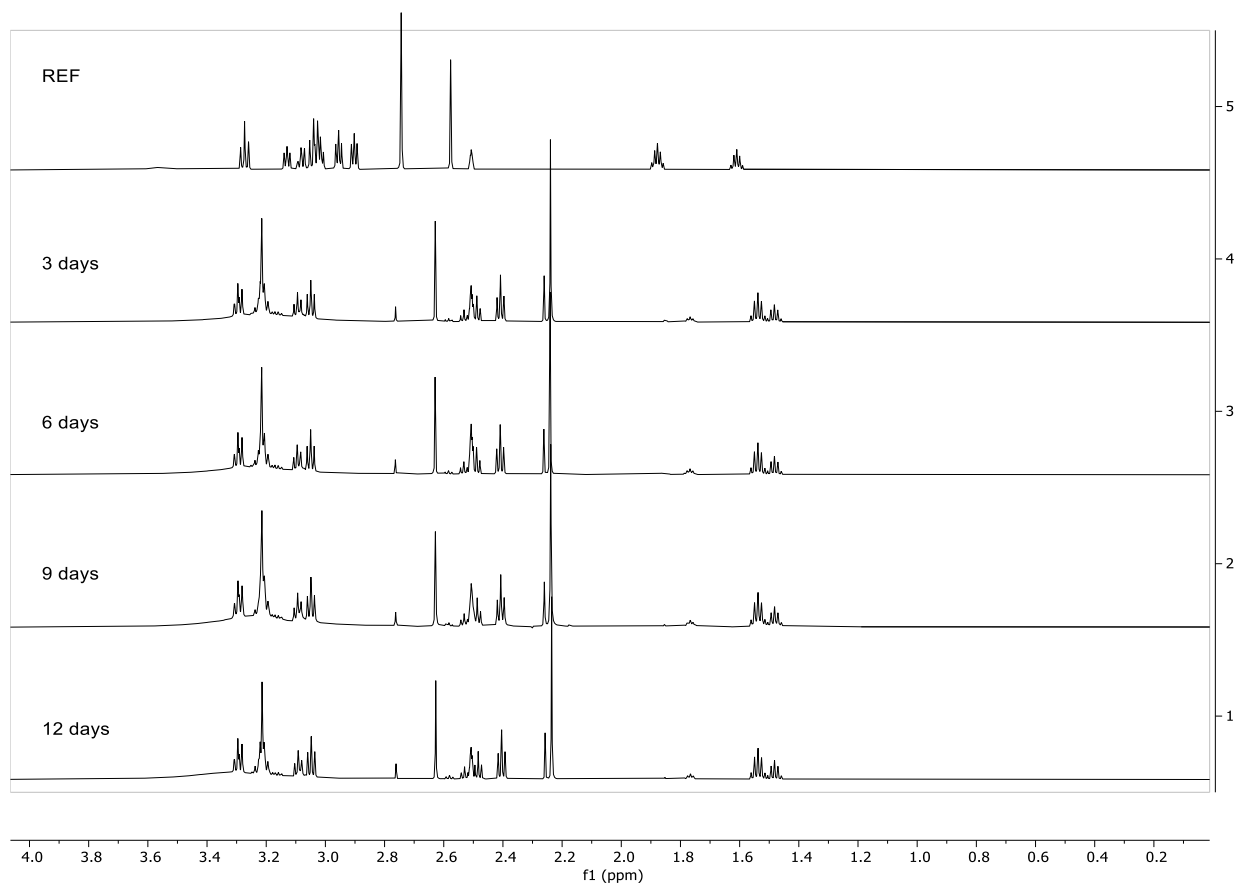

Figure S73  $^1\text{H}$  NMR 1 molar equivalent of mTBN and 5 molar equivalents of water.

| Structure | Time    | Integral N-Methyl 1 | Integral N-Methyl 2 | Integral N Methyl total | Integral HP 1 | Integral HP 2 | Integral HP Total | % HP   |
|-----------|---------|---------------------|---------------------|-------------------------|---------------|---------------|-------------------|--------|
|           | 3 days  | 0.00                | 0.00                | 0.00                    | 41235200.00   | 15406000.00   | 56641200.00       | 0.00   |
|           | 6 days  | 0.00                | 0.00                | 0.00                    | 31242600.00   | 12217800.00   | 43460400.00       | 100.00 |
|           | 9 days  | 0.00                | 0.00                | 0.00                    | 38728600.00   | 15024800.00   | 53753400.00       | 100.00 |
|           | 12 days | 0.00                | 0.00                | 0.00                    | 38544000.00   | 14651800.00   | 53195800.00       | 100.00 |

Table S74 1 molar equivalent of mTBN and 10 molar equivalents of water.

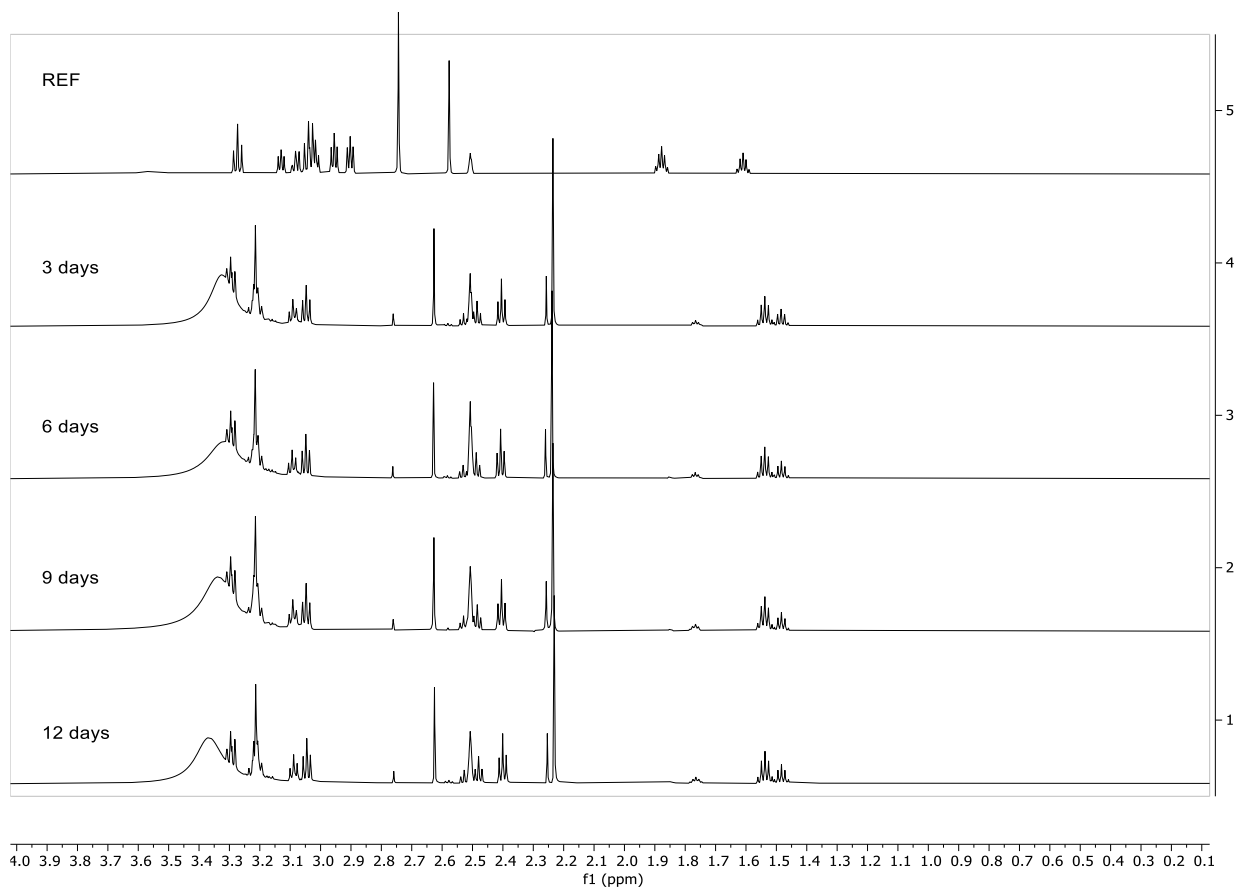

Figure S74  $^1\text{H}$  NMR 1 molar equivalent of *m*TBN and 10 molar equivalents of water.

4. [*m*TBNH][OAc] + water

a. [*m*TBNH][OAc] + water over 48h at 90°C.

| Structure | Time | integral N-Methyl 1   | Integral N-Methyl 2   | Integral N-Methyl total | Integral HP 1        | Integral HP 2        | Integral HP Total    | % HP     |
|-----------|------|-----------------------|-----------------------|-------------------------|----------------------|----------------------|----------------------|----------|
|           | REF  | 336665000000<br>00.00 | 226304000000<br>00.00 | 562969000000<br>00.00   | 23651300000.<br>00   | 35772400000.<br>00   | 59423700000.<br>00   | 0.1<br>1 |
|           | 1h   | 344312000000<br>00.00 | 228873000000<br>00.00 | 573185000000<br>00.00   | 75204100000.<br>00   | 47463300000.<br>00   | 12266740000<br>0.00  | 0.2<br>1 |
|           | 2h   | 327565000000<br>00.00 | 217915000000<br>00.00 | 545480000000<br>00.00   | 14824000000<br>0.00  | 55030600000.<br>00   | 20327060000<br>0.00  | 0.3<br>7 |
|           | 3h   | 424876000000<br>00.00 | 282773000000<br>00.00 | 707649000000<br>00.00   | 30139400000<br>0.00  | 92590500000.<br>00   | 39398450000<br>0.00  | 0.5<br>5 |
|           | 4h   | 589893000000<br>00.00 | 370217000000<br>00.00 | 960110000000<br>00.00   | 56068900000<br>0.00  | 12933100000<br>0.00  | 69002000000<br>0.00  | 0.7<br>1 |
|           | 5h   | 549270000000<br>00.00 | 341138000000<br>00.00 | 890408000000<br>00.00   | 65541500000<br>0.00  | 14319300000<br>0.00  | 79860800000<br>0.00  | 0.8<br>9 |
|           | 6h   | 545722000000<br>00.00 | 348958000000<br>00.00 | 894680000000<br>00.00   | 77069300000<br>0.00  | 16739900000<br>0.00  | 93809200000<br>0.00  | 1.0<br>4 |
|           | 7h   | 400577000000<br>00.00 | 264000000000<br>00.00 | 664577000000<br>00.00   | 67349300000<br>0.00  | 14319200000<br>0.00  | 81668500000<br>0.00  | 1.2<br>1 |
|           | 8h   | 149432000000<br>00.00 | 100235000000<br>00.00 | 249667000000<br>00.00   | 27028400000<br>0.00  | 57500100000.<br>00   | 32778410000<br>0.00  | 1.3<br>0 |
|           | 24 h | 352489000000<br>00.00 | 247189000000<br>00.00 | 599678000000<br>00.00   | 20870400000<br>00.00 | 45353400000<br>0.00  | 25405740000<br>0.00  | 4.0<br>6 |
|           | 48 h | 408184000000<br>00.00 | 310473000000<br>00.00 | 718657000000<br>00.00   | 50179200000<br>00.00 | 10581900000<br>00.00 | 60761100000<br>00.00 | 7.8<br>0 |

Table S75 1 molar equivalent of [*m*TBNH][OAc] and 0.2 molar equivalents of water.

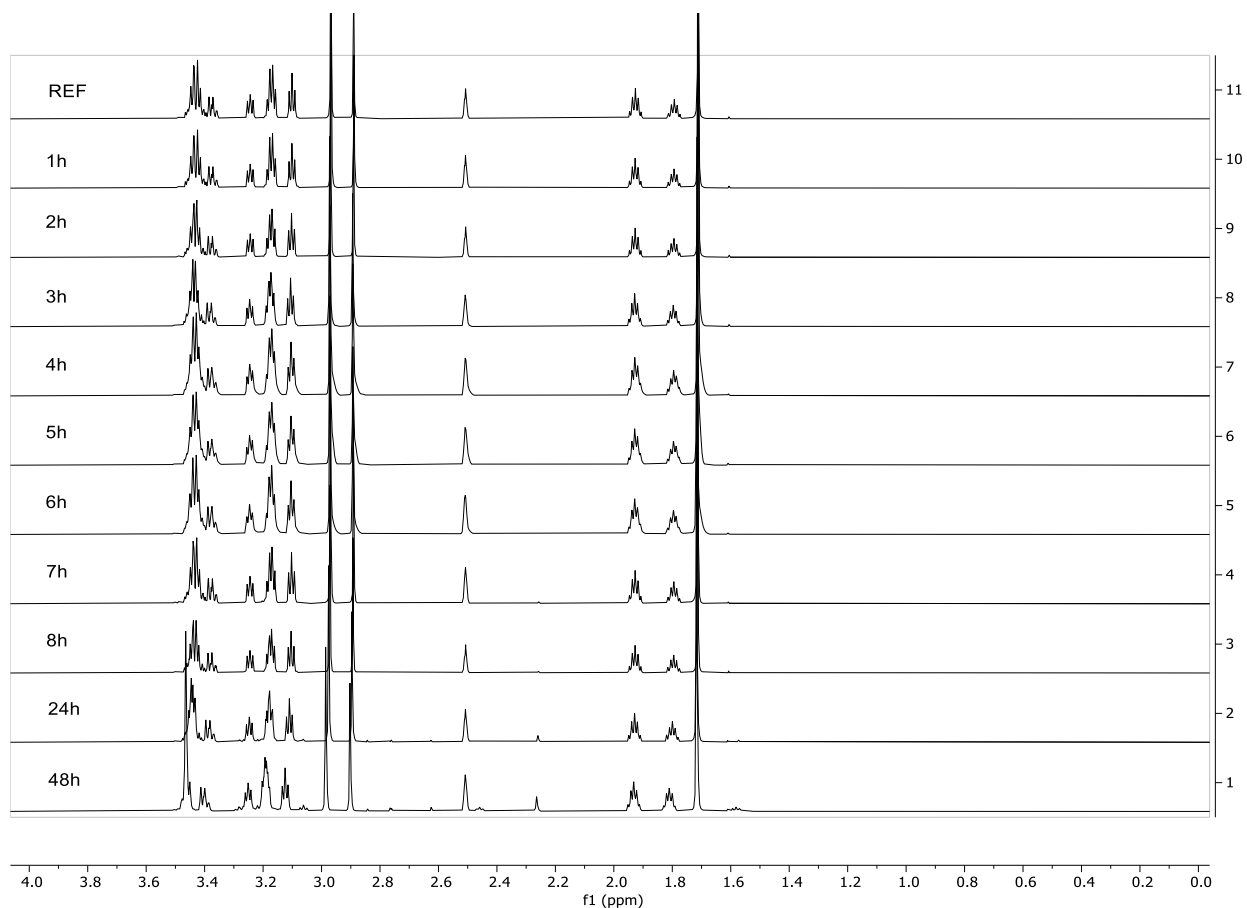

Figure S75  $^1\text{H}$  NMR 1 molar equivalent of  $[\text{mTBNH}][\text{OAc}]$  and 0.2 molar equivalents of water.

| Structure | Time | Integral N-Methyl | Integral N-Methyl | Integral N Methyl total | Integral HP 1    | Integral HP 2   | Integral HP Total | % HP      |
|-----------|------|-------------------|-------------------|-------------------------|------------------|-----------------|-------------------|-----------|
|           | REF  | 213554000.0<br>0  | 142810000.0<br>0  | 356364000.0<br>0        | 143008.00        | 175407.00       | 318415.00         | 0.09      |
|           | 1h   | 223300000.0<br>0  | 149067000.0<br>0  | 372367000.0<br>0        | 558485.00        | 284023.00       | 842508.00         | 0.23      |
|           | 2h   | 213868000.0<br>0  | 142280000.0<br>0  | 356148000.0<br>0        | 1185810.00       | 478905.00       | 1664715.00        | 0.47      |
|           | 3h   | 213490000.0<br>0  | 140803000.0<br>0  | 354293000.0<br>0        | 1811730.00       | 528672.00       | 2340402.00        | 0.66      |
|           | 4h   | 207204000.0<br>0  | 135660000.0<br>0  | 342864000.0<br>0        | 2564280.00       | 788882.00       | 3353162.00        | 0.97      |
|           | 5h   | 181008000.0<br>0  | 121659000.0<br>0  | 302667000.0<br>0        | 2911130.00       | 836769.00       | 3747899.00        | 1.22      |
|           | 6h   | 214612000.0<br>0  | 144045000.0<br>0  | 358657000.0<br>0        | 4035350.00       | 1093630.00      | 5128980.00        | 1.41      |
|           | 7h   | 223478000.0<br>0  | 151878000.0<br>0  | 375356000.0<br>0        | 5110500.00       | 1329430.00      | 6439930.00        | 1.69      |
|           | 8h   | 197162000.0<br>0  | 134645000.0<br>0  | 331807000.0<br>0        | 4954200.00       | 1287290.00      | 6241490.00        | 1.85      |
|           | 24h  | 122861000.0<br>0  | 89042900.00       | 211903900.0<br>0        | 9928710.00       | 1919070.00      | 11847780.00       | 5.30      |
|           | 48h  | 551909000.0<br>0  | 444737000.0<br>0  | 996646000.0<br>0        | 101972000.0<br>0 | 19104700.0<br>0 | 121076700.0<br>0  | 10.8<br>3 |

Table S76 1 molar equivalent of  $[\text{mTBNH}][\text{OAc}]$  and 0,5 molar equivalents of water.

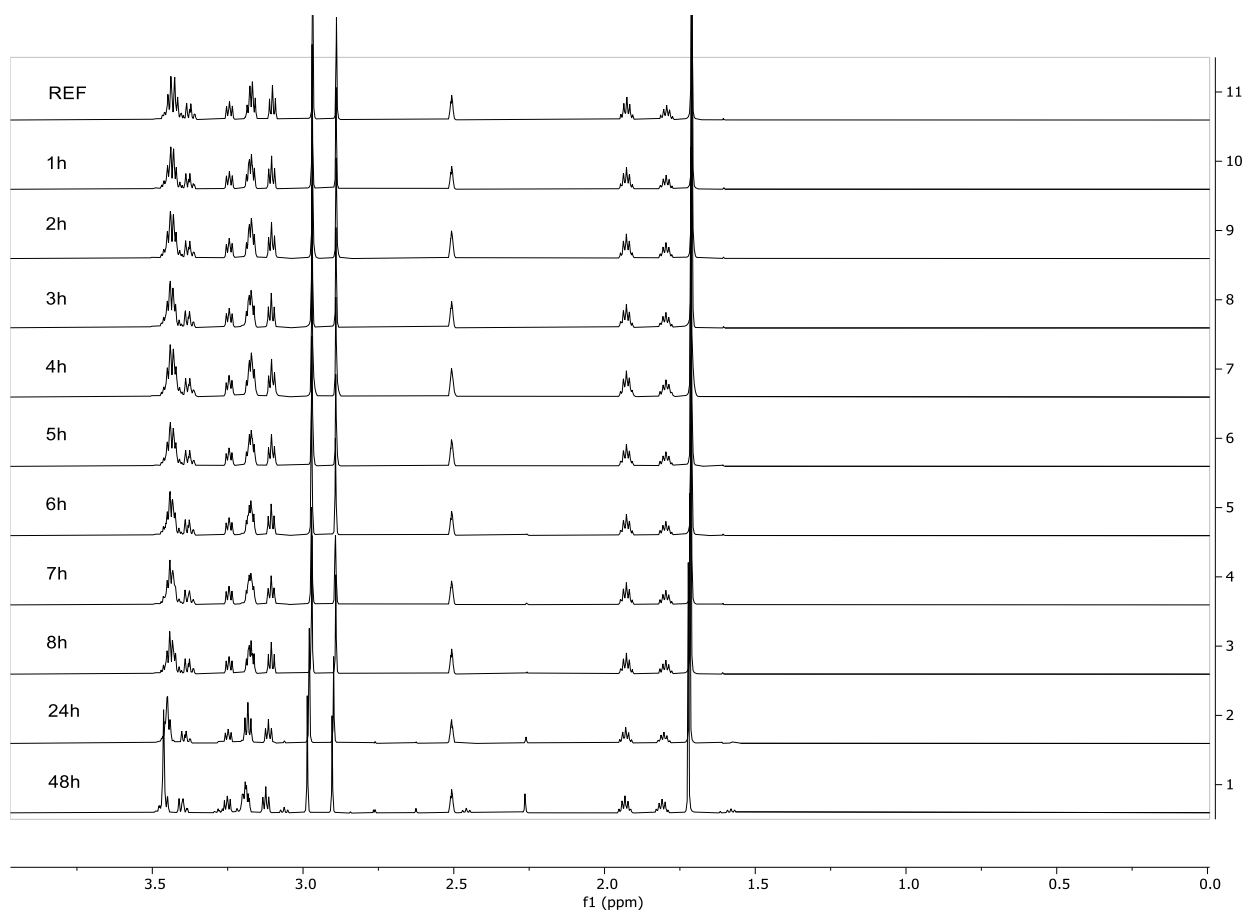

Figure S76  $^1\text{H}$  NMR 1 molar equivalent of  $[\text{mTBNH}][\text{OAc}]$  and 0,5 molar equivalents of water.

| Structure | Time | Integral N-Methyl | Integral N-Methyl | Integral N Methyl total | Integral HP 1 | Integral HP 2 | Integral HP Total | % HP  |
|-----------|------|-------------------|-------------------|-------------------------|---------------|---------------|-------------------|-------|
|           | REF  | 218724000.00      | 147430000.00      | 366154000.00            | 0.00          | 0.00          | 0.00              | 0.00  |
|           | 1h   | 210968000.00      | 144586000.00      | 355554000.00            | 327610.00     | 315059.00     | 642669.00         | 0.18  |
|           | 2h   | 211877000.00      | 145307000.00      | 357184000.00            | 1008150.00    | 477596.00     | 1485746.00        | 0.41  |
|           | 3h   | 199022000.00      | 136587000.00      | 335609000.00            | 1548820.00    | 598917.00     | 2147737.00        | 0.64  |
|           | 4h   | 214490000.00      | 149088000.00      | 363578000.00            | 2764430.00    | 816421.00     | 3580851.00        | 0.98  |
|           | 5h   | 225148000.00      | 154708000.00      | 379856000.00            | 3528860.00    | 973696.00     | 4502556.00        | 1.17  |
|           | 6h   | 185807000.00      | 125472000.00      | 311279000.00            | 3170250.00    | 877822.00     | 4048072.00        | 1.28  |
|           | 7h   | 177393000.00      | 121825000.00      | 299218000.00            | 3244530.00    | 933490.00     | 4178020.00        | 1.38  |
|           | 8h   | 198386000.00      | 136337000.00      | 334723000.00            | 4460040.00    | 1246870.00    | 5706910.00        | 1.68  |
|           | 24h  | 182436000.00      | 137243000.00      | 319679000.00            | 17432100.00   | 3895720.00    | 21327820.00       | 6.25  |
|           | 48h  | 151916000.00      | 125530000.00      | 277446000.00            | 32571500.00   | 6553030.00    | 39124530.00       | 12.36 |

Table S77 1 molar equivalent of  $[\text{mTBNH}][\text{OAc}]$  and 1 molar equivalents of water.

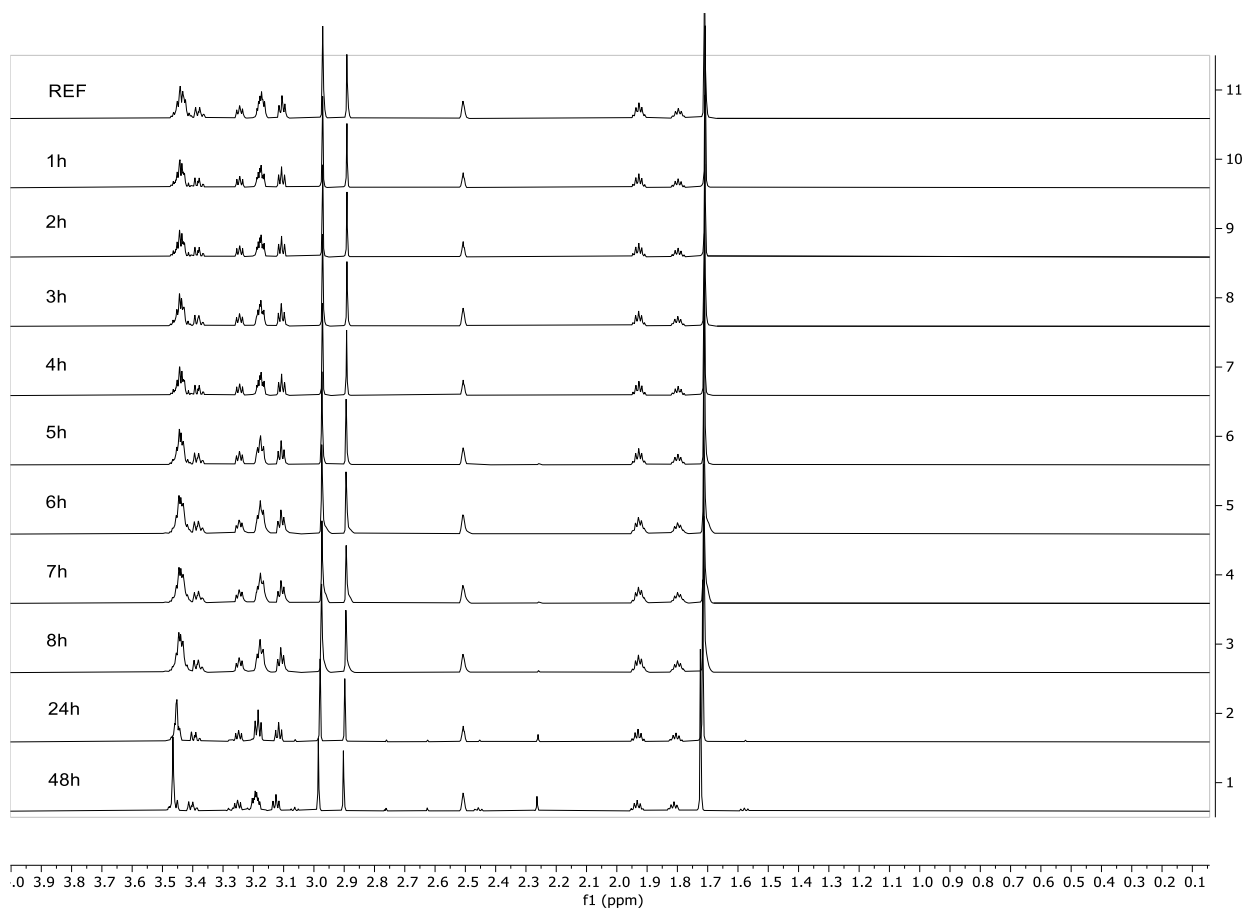

Figure S77  $^1\text{H}$  NMR 1 molar equivalent of  $[\text{mTBNH}][\text{OAc}]$  and 1 molar equivalents of water.

| Structure | Time | integral N-Methyl | integral N-Methyl | integral N-Methyl total | integral HP 1 | integral HP 2 | integral HP Total | % HP |
|-----------|------|-------------------|-------------------|-------------------------|---------------|---------------|-------------------|------|
|           | REF  | 163742000.00      | 111893000.00      | 275635000.00            | 40961.10      | 179526.00     | 220487.10         |      |
|           | 1h   | 177484000.00      | 120743000.00      | 298227000.00            | 220661.00     | 237864.00     | 458525.00         | 0.15 |
|           | 2h   | 169317000.00      | 114283000.00      | 283600000.00            | 415335.00     | 279484.00     | 694819.00         | 0.24 |
|           | 3h   | 152955000.00      | 101732000.00      | 254687000.00            | 647744.00     | 275147.00     | 922891.00         | 0.36 |
|           | 4h   | 174700000.00      | 116986000.00      | 291686000.00            | 985405.00     | 395518.00     | 1380923.00        | 0.47 |
|           | 5h   | 171060000.00      | 115399000.00      | 286459000.00            | 1197990.00    | 429394.00     | 1627384.00        | 0.56 |
|           | 6h   | 176529000.00      | 119765000.00      | 296294000.00            | 1403780.00    | 421767.00     | 1825547.00        | 0.61 |
|           | 7h   | 138106000.00      | 95870100.00       | 233976100.00            | 1353170.00    | 438154.00     | 1791324.00        | 0.76 |
|           | 8h   | 155870000.00      | 107448000.00      | 263318000.00            | 1646190.00    | 519846.00     | 2166036.00        | 0.82 |
|           | 24h  | 152868000.00      | 105868000.00      | 258736000.00            | 5172080.00    | 998419.00     | 6170499.00        | 2.33 |
|           | 48h  | 148394000.00      | 106352000.00      | 254746000.00            | 11090200.00   | 2181700.00    | 13271900.00       | 4.95 |

Table S78 1 molar equivalent of  $[\text{mTBNH}][\text{OAc}]$  and 5 molar equivalents of water.

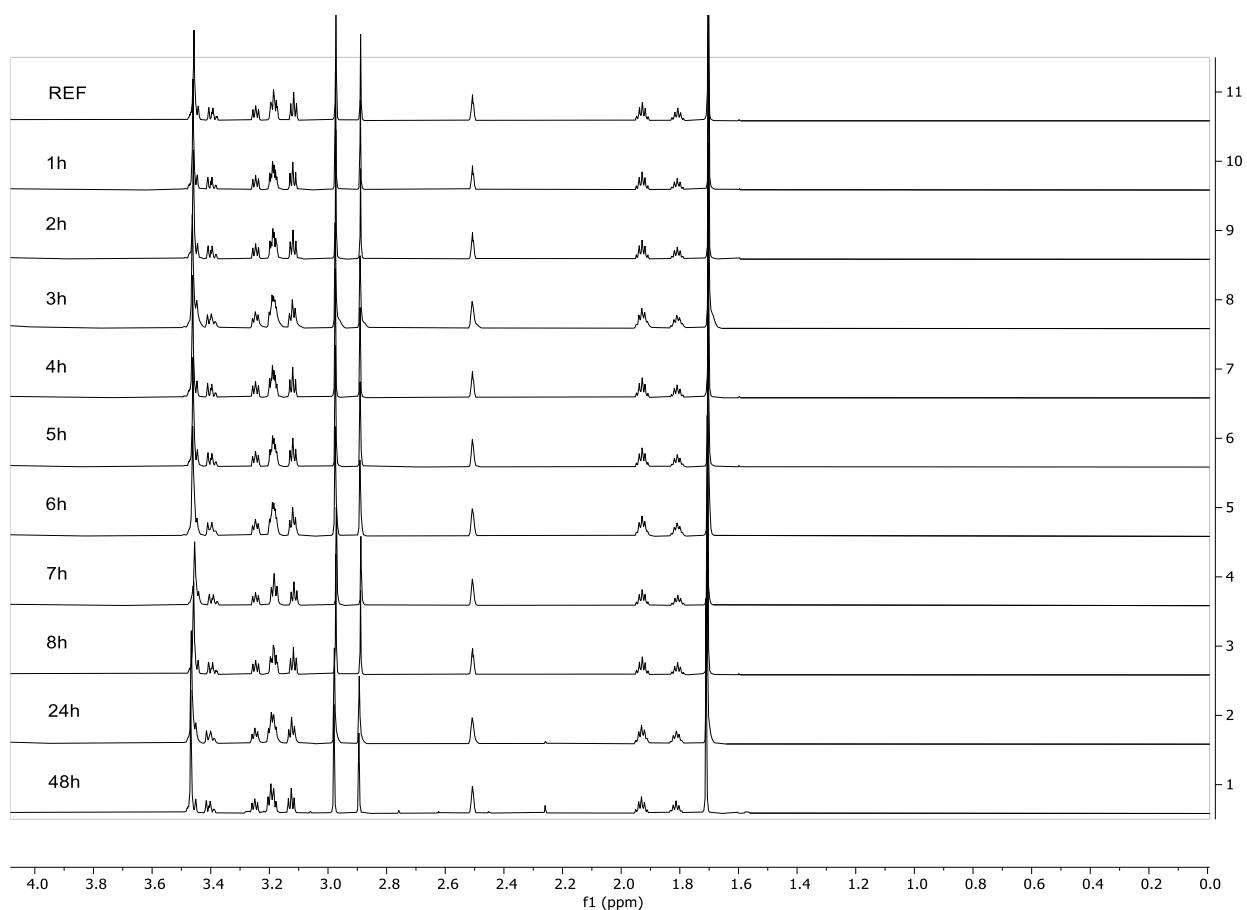

Figure S78  $^1\text{H}$  NMR 1 molar equivalent of  $[\text{mTBNH}][\text{OAc}]$  and 5 molar equivalents of water.

| Structure | Time | Integral N-Methyl | Integral N-Methyl | Integral N-Methyl total | Integral HP 1 | Integral HP 2 | Integral HP Total | % HP |
|-----------|------|-------------------|-------------------|-------------------------|---------------|---------------|-------------------|------|
|           | REF  | 127954000.00      | 85446800.00       | 213400800.00            | 79223.20      | 191353.00     | 270576.20         |      |
|           | 1h   | 132023000.00      | 88060500.00       | 220083500.00            | 104384.00     | 234173.00     | 338557.00         | 0.15 |
|           | 2h   | 137858000.00      | 92166500.00       | 230024500.00            | 152727.00     | 234848.00     | 387575.00         | 0.17 |
|           | 3h   | 121263000.00      | 80096100.00       | 201359100.00            | 231998.00     | 294935.00     | 526933.00         | 0.26 |
|           | 4h   | 137695000.00      | 92140700.00       | 229835700.00            | 345971.00     | 331375.00     | 677346.00         | 0.29 |
|           | 5h   | 129706000.00      | 85911300.00       | 215617300.00            | 369118.00     | 326471.00     | 695589.00         | 0.32 |
|           | 6h   | 141257000.00      | 94705000.00       | 235962000.00            | 462608.00     | 379181.00     | 841789.00         | 0.36 |
|           | 7h   | 121419000.00      | 80648600.00       | 202067600.00            | 527291.00     | 480460.00     | 1007751.00        | 0.50 |
|           | 8h   | 126393000.00      | 84383600.00       | 210776600.00            | 646993.00     | 529049.00     | 1176042.00        | 0.55 |
|           | 24h  | 134462000.00      | 88856500.00       | 223318500.00            | 2178680.00    | 782227.00     | 2960907.00        | 1.31 |
|           | 48h  | 204864000.00      | 144396000.00      | 349260000.00            | 15149900.00   | 3358300.00    | 18508200.00       | 5.03 |

Table S79 1 molar equivalent of  $[\text{mTBNH}][\text{OAc}]$  and 10 molar equivalents of water.

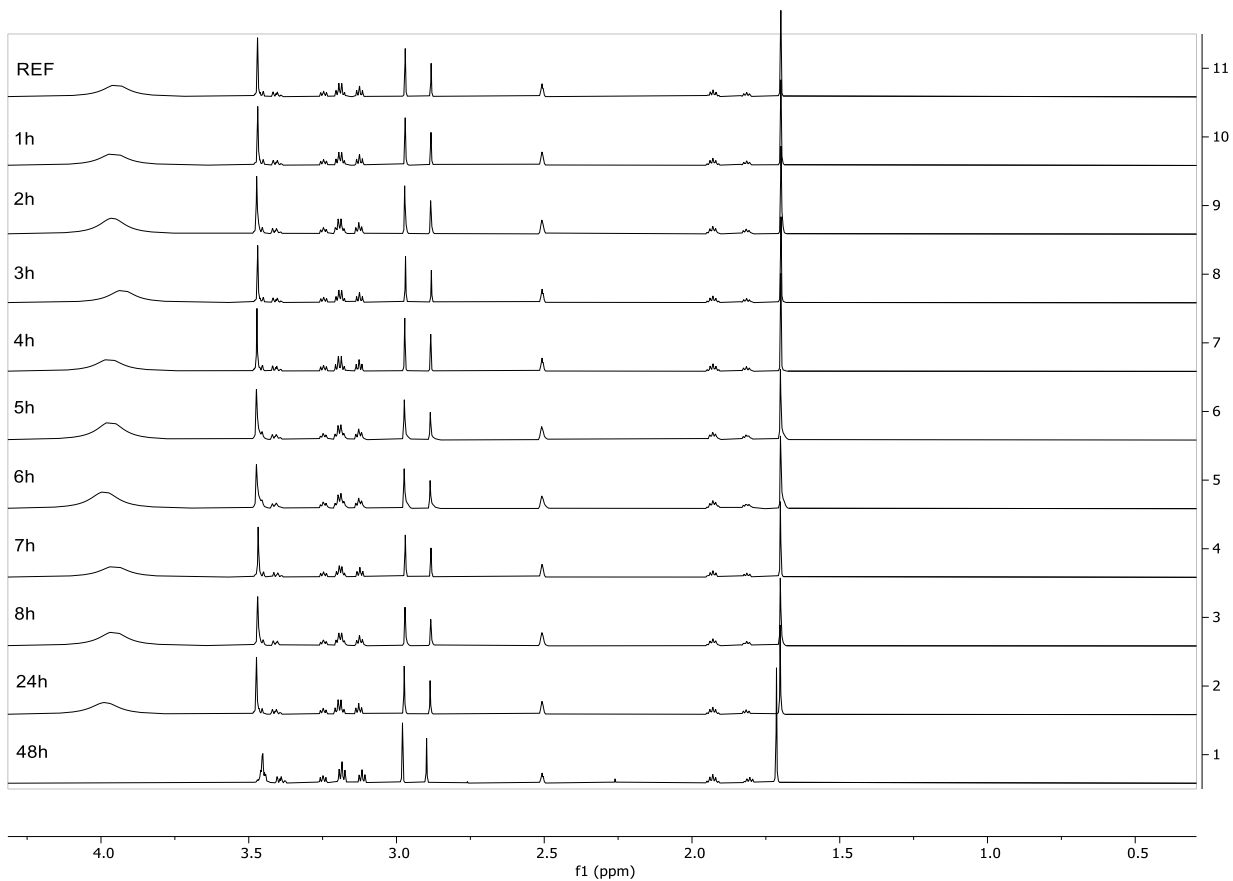

Figure S79  $^1\text{H}$  NMR 1 molar equivalent of  $[\text{mTBNH}][\text{OAc}]$  and 10 molar equivalents of water.

b.  $[\text{mTBNH}][\text{OAc}] + \text{water}$  at  $90^\circ\text{C}$  over 12 days.

| Structure | Time    | Integral N-Methyl 1 | Integral N-Methyl 2 | Integral N Methyl total | Integral HP 1 | Integral HP 2 | Integral HP Total | % HP  |
|-----------|---------|---------------------|---------------------|-------------------------|---------------|---------------|-------------------|-------|
|           | 3 days  | 34001700.00         | 28664200.00         | 62665900.00             | 10204400.00   | 2904460.00    | 13108860.00       | 17.30 |
|           | 6 days  | 25639500.00         | 25201700.00         | 50841200.00             | 14294700.00   | 4630280.00    | 18924980.00       | 27.13 |
|           | 9 days  | 23818200.00         | 25662100.00         | 49480300.00             | 17872100.00   | 6828110.00    | 24700210.00       | 33.30 |
|           | 12 days | 23519800.00         | 25227200.00         | 48747000.00             | 18814600.00   | 8341380.00    | 27155980.00       | 35.78 |

Table S80 1 molar equivalent of  $[\text{mTBNH}][\text{OAc}]$  and 1 molar equivalents of water.



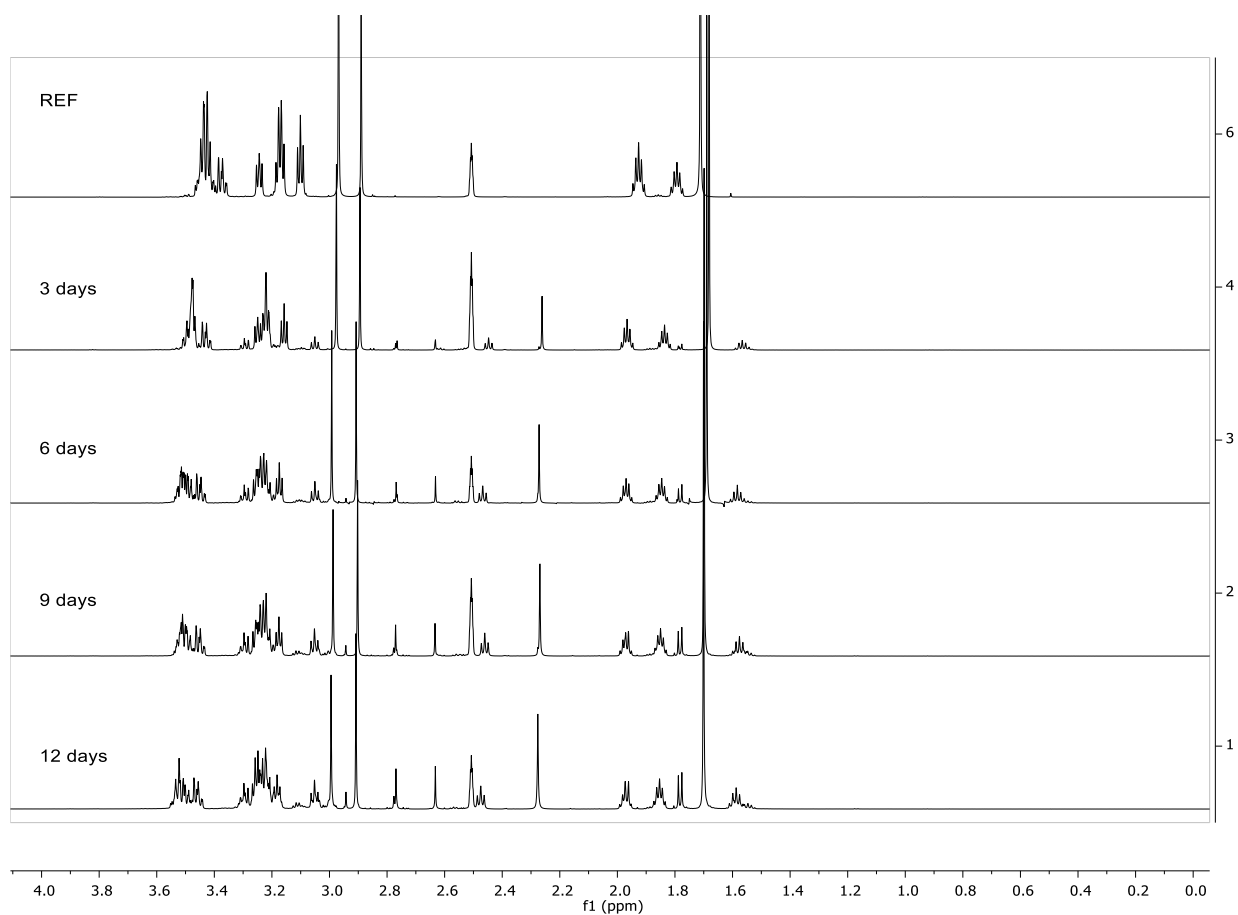

Figure S80  $^1\text{H}$  NMR 1 molar equivalent of  $[\text{mTBNH}][\text{OAc}]$  and 1 molar equivalents of water.

| Structure | Time    | Integral N-Methyl 1 | Integral N-Methyl 2 | Integral N-Methyl total | Integral HP 1 | Integral HP 2 | Integral HP Total | % HP  |
|-----------|---------|---------------------|---------------------|-------------------------|---------------|---------------|-------------------|-------|
|           | 3 days  | 38420400.00         | 27596500.00         | 66016900.00             | 4182720.00    | 1441130.00    | 5623850.00        | 0.00  |
|           | 6 days  | 24514000.00         | 19230500.00         | 43744500.00             | 5397700.00    | 1785630.00    | 7183330.00        | 14.10 |
|           | 9 days  | 25897000.00         | 21121900.00         | 47018900.00             | 7891490.00    | 2580550.00    | 10472040.00       | 18.22 |
|           | 12 days | 27752300.00         | 23631900.00         | 51384200.00             | 10403600.00   | 3502850.00    | 13906450.00       | 21.30 |

Table S81 1 molar equivalent of  $[\text{mTBNH}][\text{OAc}]$  and 5 molar equivalents of water.

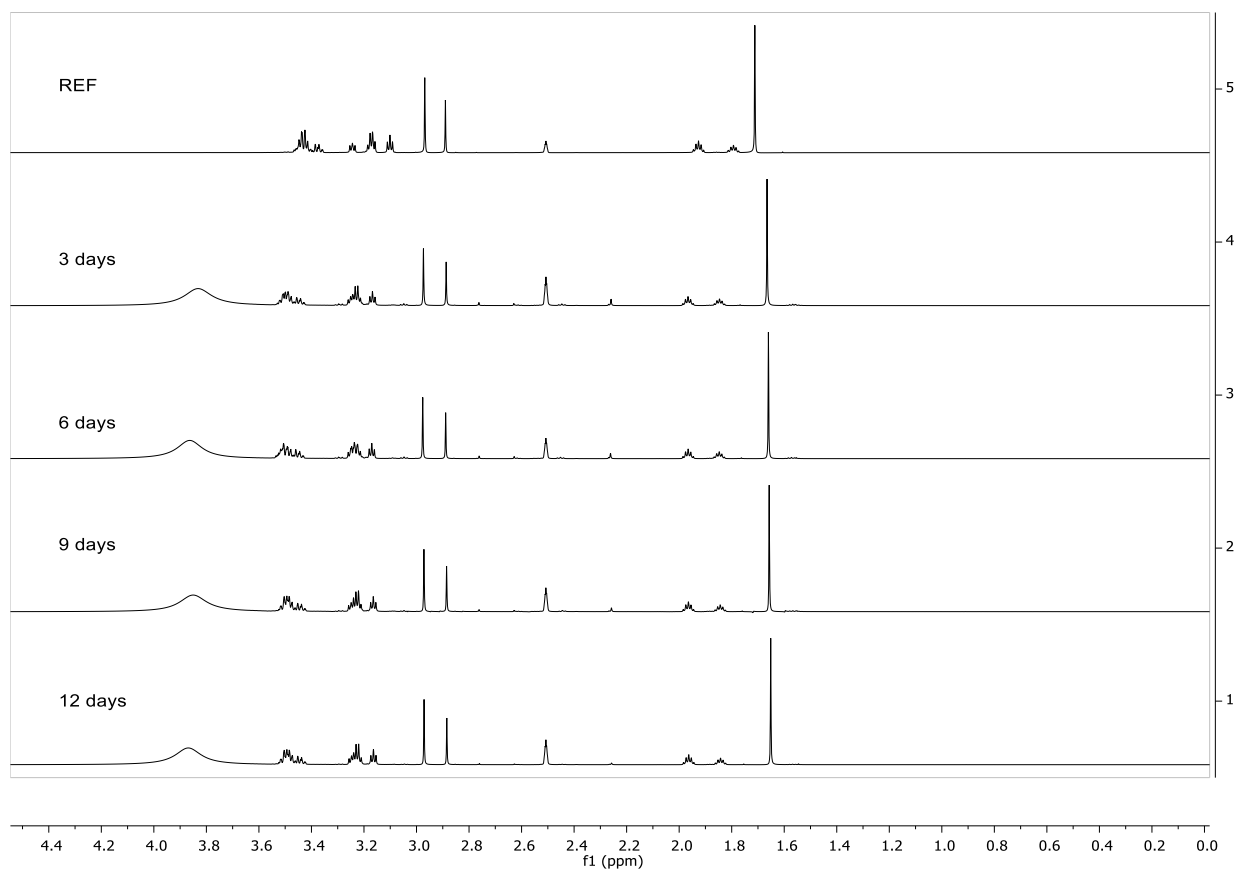

Figure S81 <sup>1</sup>H NMR 1 molar equivalent of [mTBNH][OAc] and 5 molar equivalents of water.

| Structure | Time    | Integral N-Methyl 1 | Integral N-Methyl 2 | Integral N Methyl total | Integral HP 1 | Integral HP 2 | Integral HP Total | % HP  |
|-----------|---------|---------------------|---------------------|-------------------------|---------------|---------------|-------------------|-------|
|           | 3 days  | 21957100.00         | 15203800.00         | 37160900.00             | 1327510.00    | 1001140.00    | 2328650.00        | 0.00  |
|           | 6 days  | 27629500.00         | 20076800.00         | 47706300.00             | 3029630.00    | 1999850.00    | 5029480.00        | 9.54  |
|           | 9 days  | 23755200.00         | 17248600.00         | 41003800.00             | 3295790.00    | 1697480.00    | 4993270.00        | 10.86 |
|           | 12 days | 25644400.00         | 19079500.00         | 44723900.00             | 4488240.00    | 2445020.00    | 6933260.00        | 13.42 |

Table S82 1 molar equivalent of [mTBNH][OAc] and 10 molar equivalents of water.

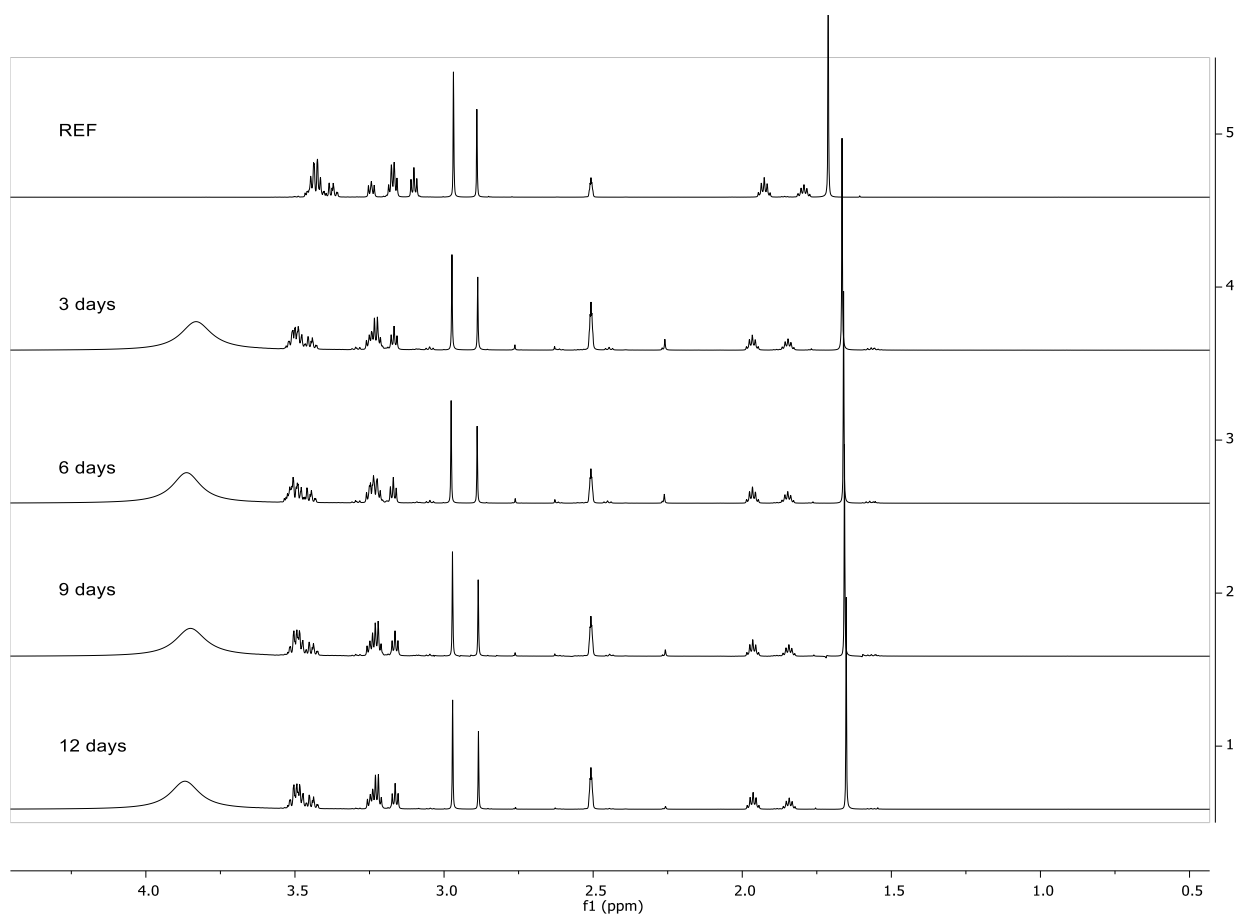

Figure S82 <sup>1</sup>H NMR 1 molar equivalent of [mTBNH][OAc] and 10 molar equivalents of water.

c. [mTBNH][OAc] + water at 70°C over 12 days.

| Structure | Time    | Integral N-Methyl 1 | Integral N-Methyl 2 | Integral N-Methyl total | Integral HP 1 | Integral HP 2 | Integral HP Total | % HP |
|-----------|---------|---------------------|---------------------|-------------------------|---------------|---------------|-------------------|------|
|           | 3 days  | 54770200.00         | 38247000.00         | 93017200.00             | 892626.00     | 747923.00     | 1640549.00        | 1.73 |
|           | 6 days  | 46872600.00         | 32819400.00         | 79692000.00             | 2242430.00    | 67743.50      | 2310173.50        | 2.82 |
|           | 9 days  | 49915100.00         | 35436900.00         | 93017200.00             | 2059980.00    | 977342.00     | 3037322.00        | 3.44 |
|           | 12 days | 45398200.00         | 31443800.00         | 79692000.00             | 2878130.00    | 000           | 2878130.00        | 3.61 |

Table S83 1 molar equivalent of [mTBNH][OAc] and 1 molar equivalents of water.

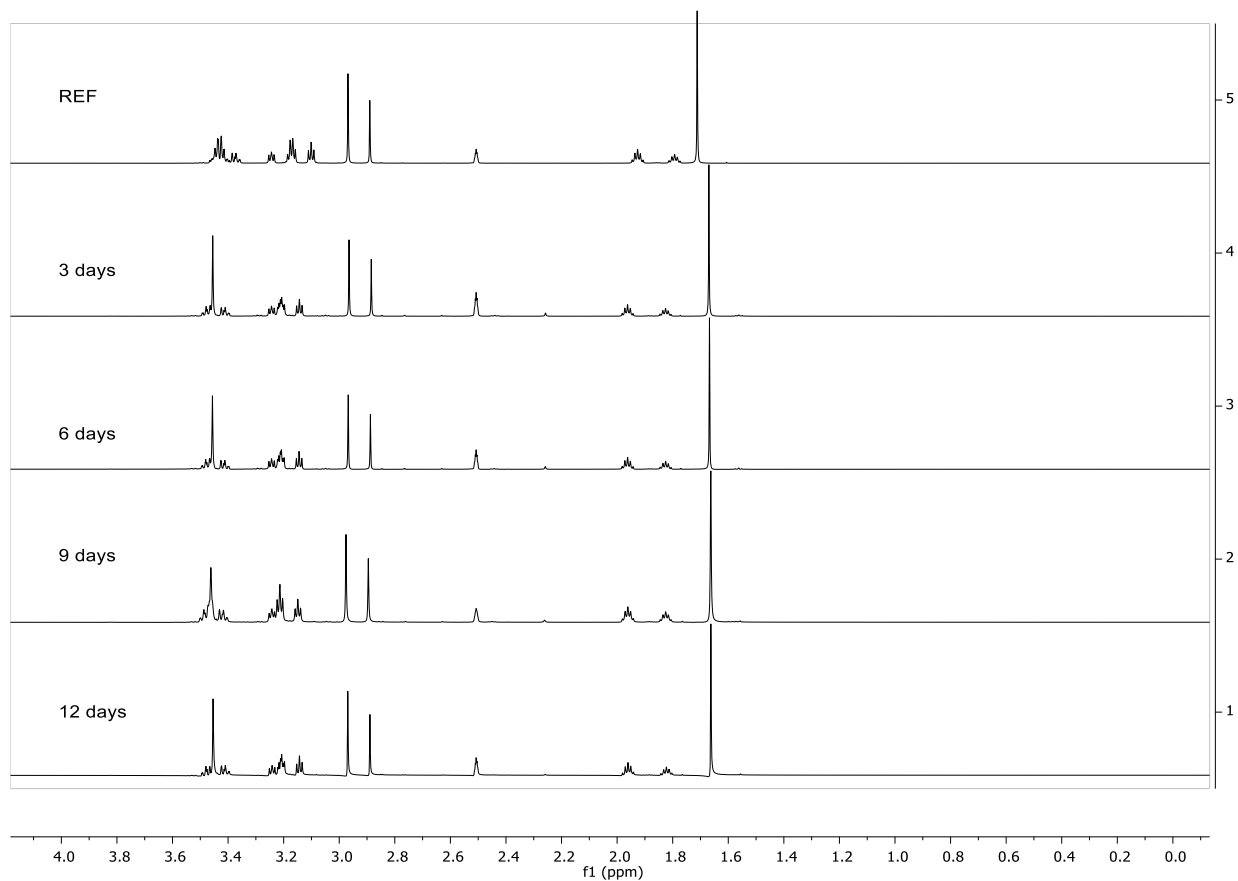

Figure S83  $^1\text{H}$  NMR 1 molar equivalent of  $[\text{mTBNH}][\text{OAc}]$  and 1 molar equivalents of water.

| Structure | Time    | Integral N-Methyl 1 | Integral N-Methyl 2 | Integral N-Methyl total | Integral HP 1 | Integral HP 2 | Integral HP Total | % HP |
|-----------|---------|---------------------|---------------------|-------------------------|---------------|---------------|-------------------|------|
|           | 3 days  | 34039100.00         | 23021700.00         | 57060800.00             | 487475.00     | 434087.00     | 921562.00         | 0.00 |
|           | 6 days  | 29677500.00         | 20901000.00         | 50578500.00             | 713798.00     | 635828.00     | 1349626.00        | 2.60 |
|           | 9 days  | 37423000.00         | 26251300.00         | 63674300.00             | 1117470.00    | 896663.00     | 2014133.00        | 3.07 |
|           | 12 days | 29474800.00         | 21031000.00         | 57060800.00             | 1172510.00    | 963284.00     | 2135794.00        | 4.06 |

Table S84 1 molar equivalent of  $[\text{mTBNH}][\text{OAc}]$  and 5 molar equivalents of water.

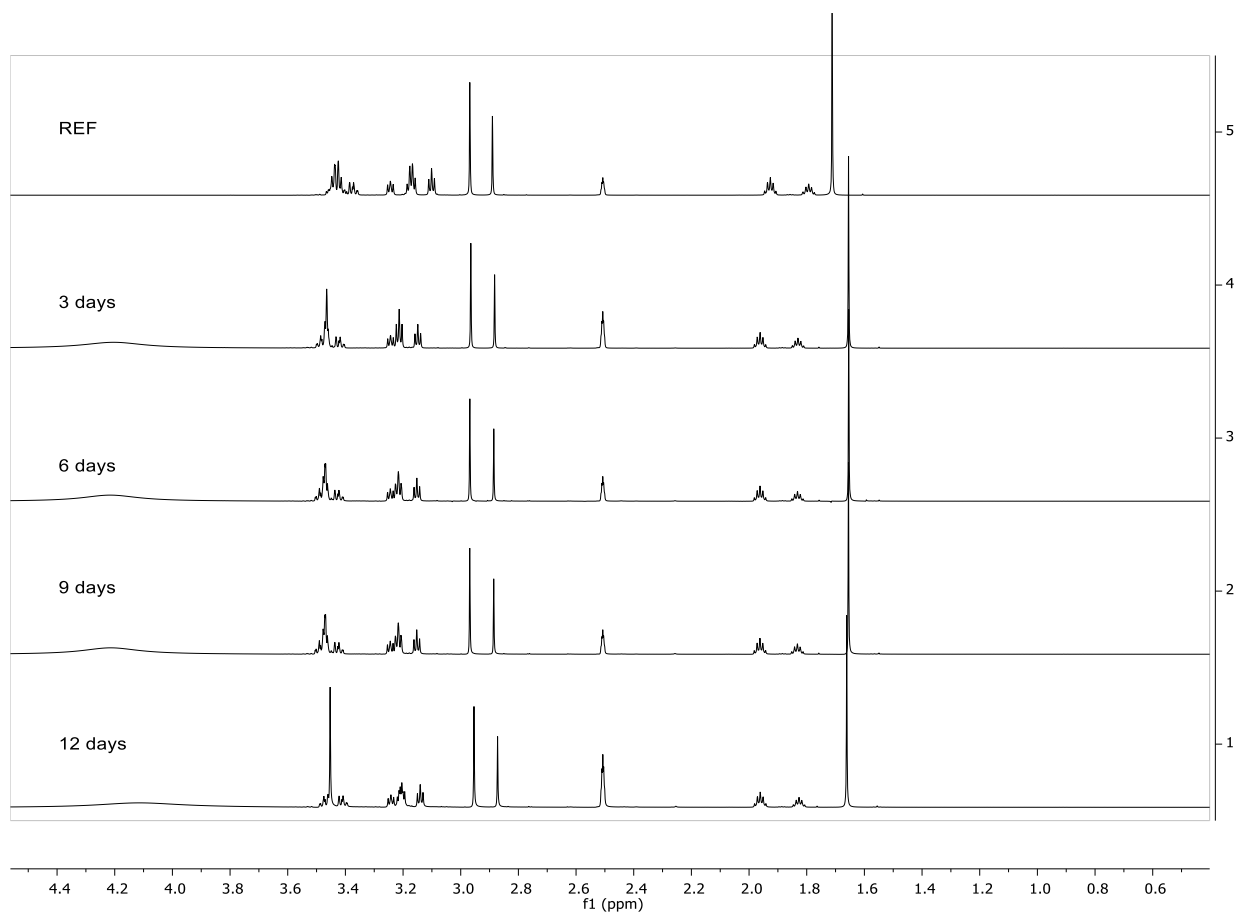

Figure S84  $^1\text{H}$  NMR 1 molar equivalent of  $[\text{mTBNH}][\text{OAc}]$  and 5 molar equivalents of water.

| Structure | Time    | Integral N-Methyl 1 | Integral N-Methyl 2 | Integral N Methyl total | Integral HP 1 | Integral HP 2 | Integral HP Total | % HP |
|-----------|---------|---------------------|---------------------|-------------------------|---------------|---------------|-------------------|------|
|           | 3 days  | 30104700.00         | 19942700.00         | 50047400.00             | 39123.00      | 0.00          | 39123.00          | 0.00 |
|           | 6 days  | 22034100.00         | 14994000.00         | 37028100.00             | 273432.00     | 0.00          | 273432.00         | 0.73 |
|           | 9 days  | 32627500.00         | 23188100.00         | 55815600.00             | 803870.00     | 0.00          | 803870.00         | 1.42 |
|           | 12 days | 22478100.00         | 16450300.00         | 38928400.00             | 643565.00     | 0.00          | 643565.00         | 1.63 |

Table S85 1 molar equivalent of  $[\text{mTBNH}][\text{OAc}]$  and 10 molar equivalents of water.

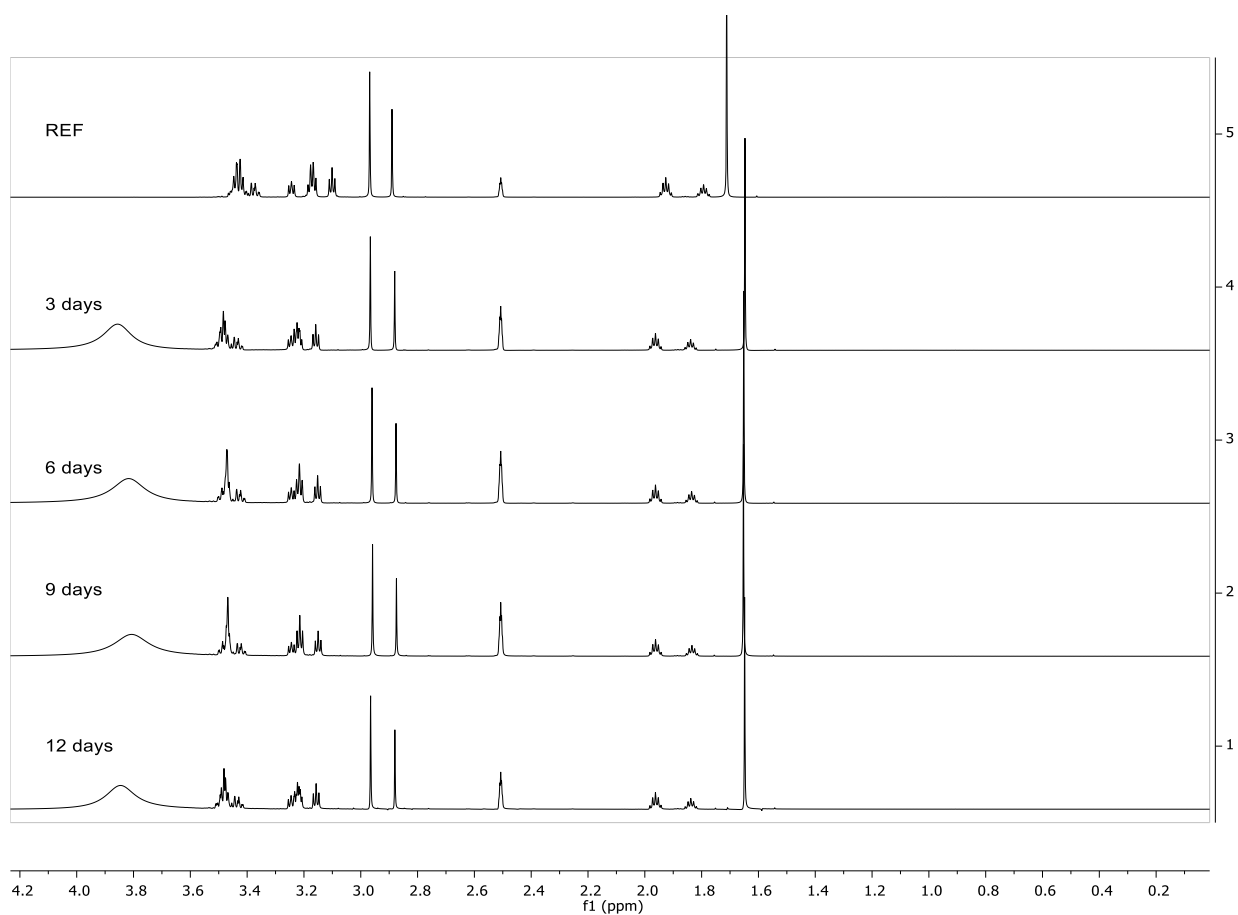

Figure S85  $^1\text{H}$  NMR 1 molar equivalent of  $[\text{mTBNH}][\text{OAc}]$  and 10 molar equivalents of water.

d.  $[\text{mTBNH}][\text{ClOAc}] + \text{water}$

| structure | Time | Integral N-Methyl 1 | Integral N-Methyl 2 | Integral N Methyl total | Integral HP 1 | Integral HP 2 | Integral HP Total | % HP |
|-----------|------|---------------------|---------------------|-------------------------|---------------|---------------|-------------------|------|
|           | REF  | 49993600.00         | 33658200.00         | 83651800.00             | 0.00          | 0.00          | 0.00              | 0.00 |
|           | 1h   | 59393600.00         | 40208500.00         | 99602100.00             | 0.00          | 0.00          | 0.00              | 0.00 |
|           | 2h   | 48709000.00         | 33100100.00         | 81809100.00             | 0.00          | 0.00          | 0.00              | 0.00 |
|           | 3h   | 51996700.00         | 35567500.00         | 87564200.00             | 0.00          | 0.00          | 0.00              | 0.00 |
|           | 4h   | 59885200.00         | 40419400.00         | 100304600.00            | 0.00          | 0.00          | 0.00              | 0.00 |
|           | 5h   | 53025400.00         | 36103500.00         | 89128900.00             | 0.00          | 0.00          | 0.00              | 0.00 |
|           | 6h   | 55324000.00         | 37274100.00         | 92598100.00             | 0.00          | 0.00          | 0.00              | 0.00 |
|           | 7h   | 54383600.00         | 36843400.00         | 91227000.00             | 0.00          | 0.00          | 0.00              | 0.00 |
|           | 8h   | 55411800.00         | 35650100.00         | 91061900.00             | 0.00          | 0.00          | 0.00              | 0.00 |
|           | 24h  | 46449800.00         | 31365700.00         | 77815500.00             | 0.00          | 0.00          | 0.00              | 0.00 |
|           | 48h  | 54093700.00         | 35271500.00         | 89365200.00             | 0.00          | 0.00          | 0.00              | 0.00 |

Table S86 1 molar equivalent of  $[\text{mTBNH}][\text{ClOAc}]$  and 0.2 molar equivalents of water.

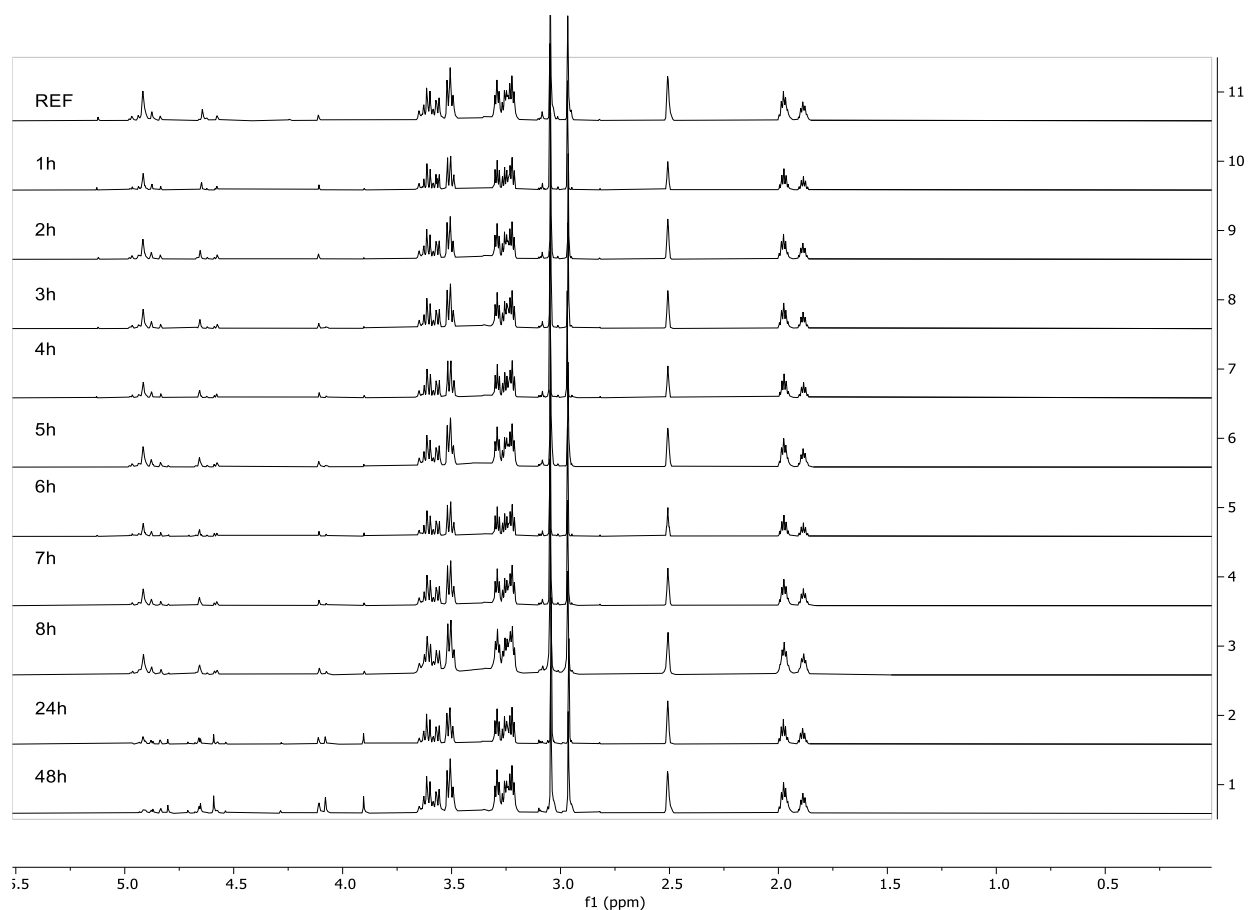

Figure S86  $^1\text{H}$  NMR 1 molar equivalent of  $[\text{mTBNH}][\text{ClOAc}]$  and 0.2 molar equivalents of water.

| Structure | Time | Integral N-Methyl | Integral N-Methyl | Integral N Methyl total | Integral HP 1 | Integral HP 2 | Integral HP Total | % HP |
|-----------|------|-------------------|-------------------|-------------------------|---------------|---------------|-------------------|------|
|           | REF  | 54592000.00       | 37083600.00       | 91675600.00             | 0.00          | 0.00          | 0.00              | 0.00 |
|           | 1h   | 45425800.00       | 27212400.00       | 72638200.00             | 0.00          | 0.00          | 0.00              | 0.00 |
|           | 2h   | 49262300.00       | 33432100.00       | 82694400.00             | 0.00          | 0.00          | 0.00              | 0.00 |
|           | 3h   | 54292200.00       | 36533600.00       | 90825800.00             | 0.00          | 0.00          | 0.00              | 0.00 |
|           | 4h   | 51045100.00       | 34840100.00       | 85885200.00             | 0.00          | 0.00          | 0.00              | 0.00 |
|           | 5h   | 53670900.00       | 36204100.00       | 89875000.00             | 0.00          | 0.00          | 0.00              | 0.00 |
|           | 6h   | 50972500.00       | 34739200.00       | 85711700.00             | 0.00          | 0.00          | 0.00              | 0.00 |
|           | 7h   | 49074600.00       | 32202400.00       | 81277000.00             | 0.00          | 0.00          | 0.00              | 0.00 |
|           | 8h   | 50352800.00       | 34264200.00       | 84617000.00             | 0.00          | 0.00          | 0.00              | 0.00 |
|           | 24h  | 59369500.00       | 39553500.00       | 98923000.00             | 0.00          | 0.00          | 0.00              | 0.00 |
|           | 48h  | 56830200.00       | 37710200.00       | 94540400.00             | 0.00          | 0.00          | 0.00              | 0.00 |

Table S87 1 molar equivalent of  $[\text{mTBNH}][\text{ClOAc}]$  and 0.5 molar equivalents of water.

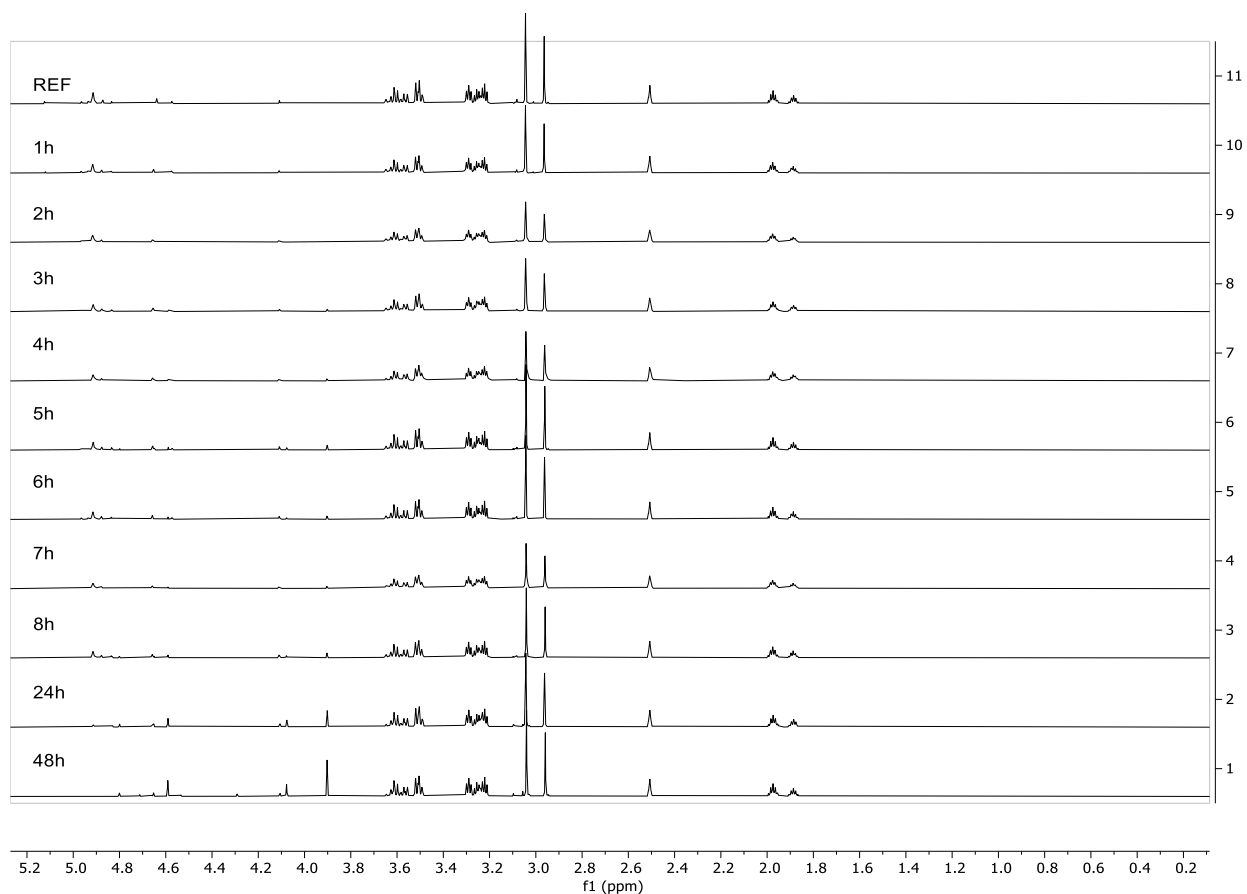

Figure S87  $^1\text{H}$  NMR 1 molar equivalent of  $[\text{mTBNH}][\text{ClOAc}]$  and 0.5 molar equivalents of water.

| Structure | Time | Integral N-Methyl | Integral N-Methyl | Integral N-Methyl total | Integral HP 1 | Integral HP 2 | Integral HP Total | % HP |
|-----------|------|-------------------|-------------------|-------------------------|---------------|---------------|-------------------|------|
|           | REF  | 41257400.00       | 28927900.00       | 70185300.00             | 0.00          | 0.00          | 0.00              | 0.00 |
|           | 1h   | 48790500.00       | 34278600.00       | 83069100.00             | 0.00          | 0.00          | 0.00              | 0.00 |
|           | 2h   | 47353300.00       | 33078000.00       | 80431300.00             | 0.00          | 0.00          | 0.00              | 0.00 |
|           | 3h   | 47992600.00       | 33598800.00       | 81591400.00             | 0.00          | 0.00          | 0.00              | 0.00 |
|           | 4h   | 51372200.00       | 35706100.00       | 87078300.00             | 0.00          | 0.00          | 0.00              | 0.00 |
|           | 5h   | 54546000.00       | 38109800.00       | 92655800.00             | 0.00          | 0.00          | 0.00              | 0.00 |
|           | 6h   | 47423400.00       | 33141300.00       | 80564700.00             | 0.00          | 0.00          | 0.00              | 0.00 |
|           | 7h   | 50459100.00       | 35216100.00       | 85675200.00             | 0.00          | 0.00          | 0.00              | 0.00 |
|           | 8h   | 49850300.00       | 34870400.00       | 84720700.00             | 0.00          | 0.00          | 0.00              | 0.00 |
|           | 24h  | 58990400.00       | 40699300.00       | 99689700.00             | 0.00          | 0.00          | 0.00              | 0.00 |
|           | 48h  | 54850600.00       | 39352100.00       | 94202700.00             | 0.00          | 0.00          | 0.00              | 0.00 |

Table S88 1 molar equivalent of  $[\text{mTBNH}][\text{ClOAc}]$  and 1 molar equivalents of water.



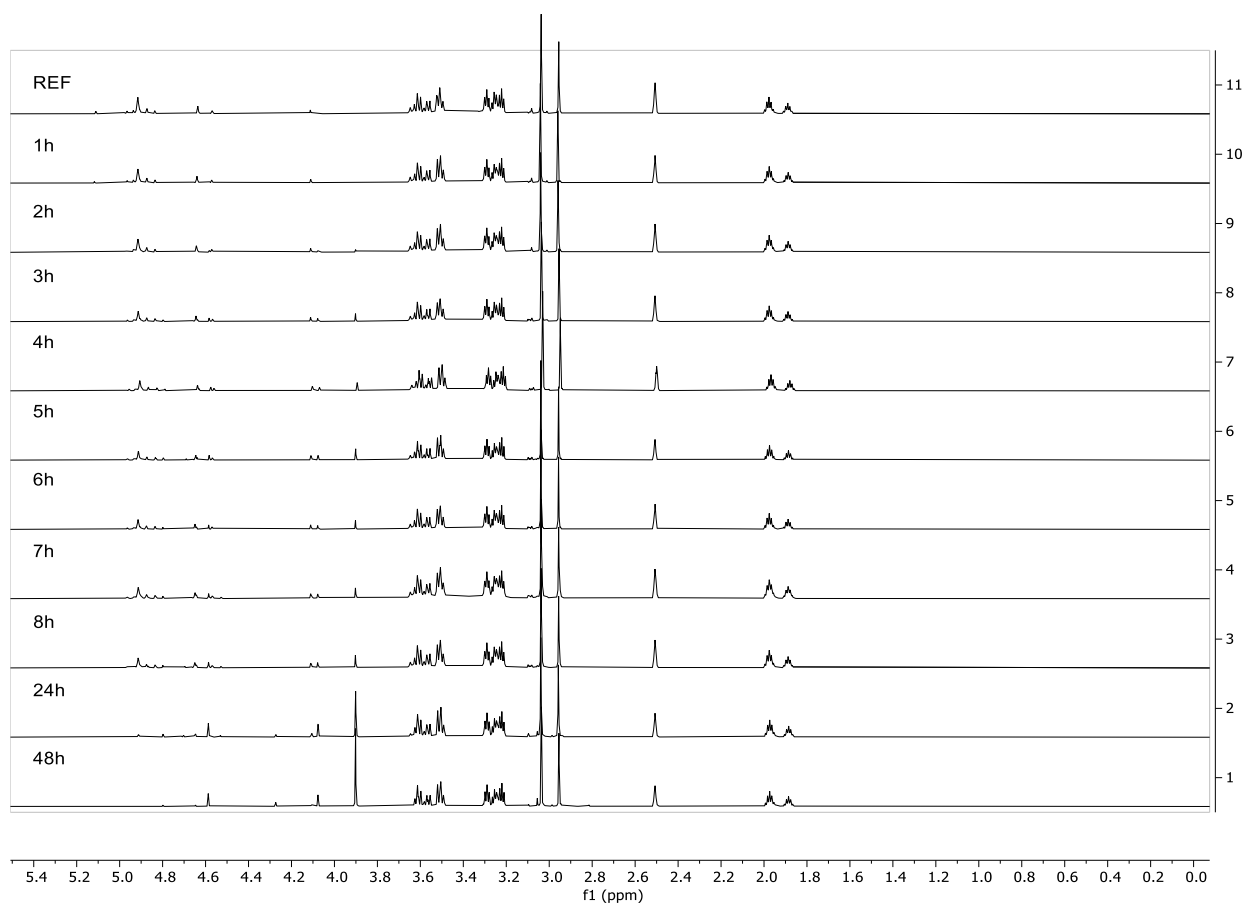

Figure S88  $^1\text{H}$  NMR 1 molar equivalent of  $[\text{mTBNH}][\text{ClOAc}]$  and 1 molar equivalents of water.

| Structure | Time | Integral N-Methyl | Integral N-Methyl | Integral N-Methyl total | Integral HP 1 | Integral HP 2 | Integral HP Total | % HP |
|-----------|------|-------------------|-------------------|-------------------------|---------------|---------------|-------------------|------|
|           | REF  | 163742000.00      | 111893000.00      | 275635000.00            | 0.00          | 0.00          | 0.00              | 0.00 |
|           | 1h   | 177484000.00      | 120743000.00      | 298227000.00            | 0.00          | 0.00          | 0.00              | 0.00 |
|           | 2h   | 169317000.00      | 114283000.00      | 283600000.00            | 0.00          | 0.00          | 0.00              | 0.00 |
|           | 3h   | 152955000.00      | 101732000.00      | 254687000.00            | 0.00          | 0.00          | 0.00              | 0.00 |
|           | 4h   | 174700000.00      | 116986000.00      | 291686000.00            | 0.00          | 0.00          | 0.00              | 0.00 |
|           | 5h   | 171060000.00      | 115399000.00      | 286459000.00            | 0.00          | 0.00          | 0.00              | 0.00 |
|           | 6h   | 176529000.00      | 119765000.00      | 296294000.00            | 0.00          | 0.00          | 0.00              | 0.00 |
|           | 7h   | 138106000.00      | 95870100.00       | 233976100.00            | 0.00          | 0.00          | 0.00              | 0.00 |
|           | 8h   | 155870000.00      | 107448000.00      | 263318000.00            | 0.00          | 0.00          | 0.00              | 0.00 |
|           | 24h  | 152868000.00      | 105868000.00      | 258736000.00            | 0.00          | 0.00          | 0.00              | 0.00 |
|           | 48h  | 148394000.00      | 106352000.00      | 254746000.00            | 0.00          | 0.00          | 0.00              | 0.00 |

Table S89 1 molar equivalent of  $[\text{mTBNH}][\text{ClOAc}]$  and 5 molar equivalents of water.

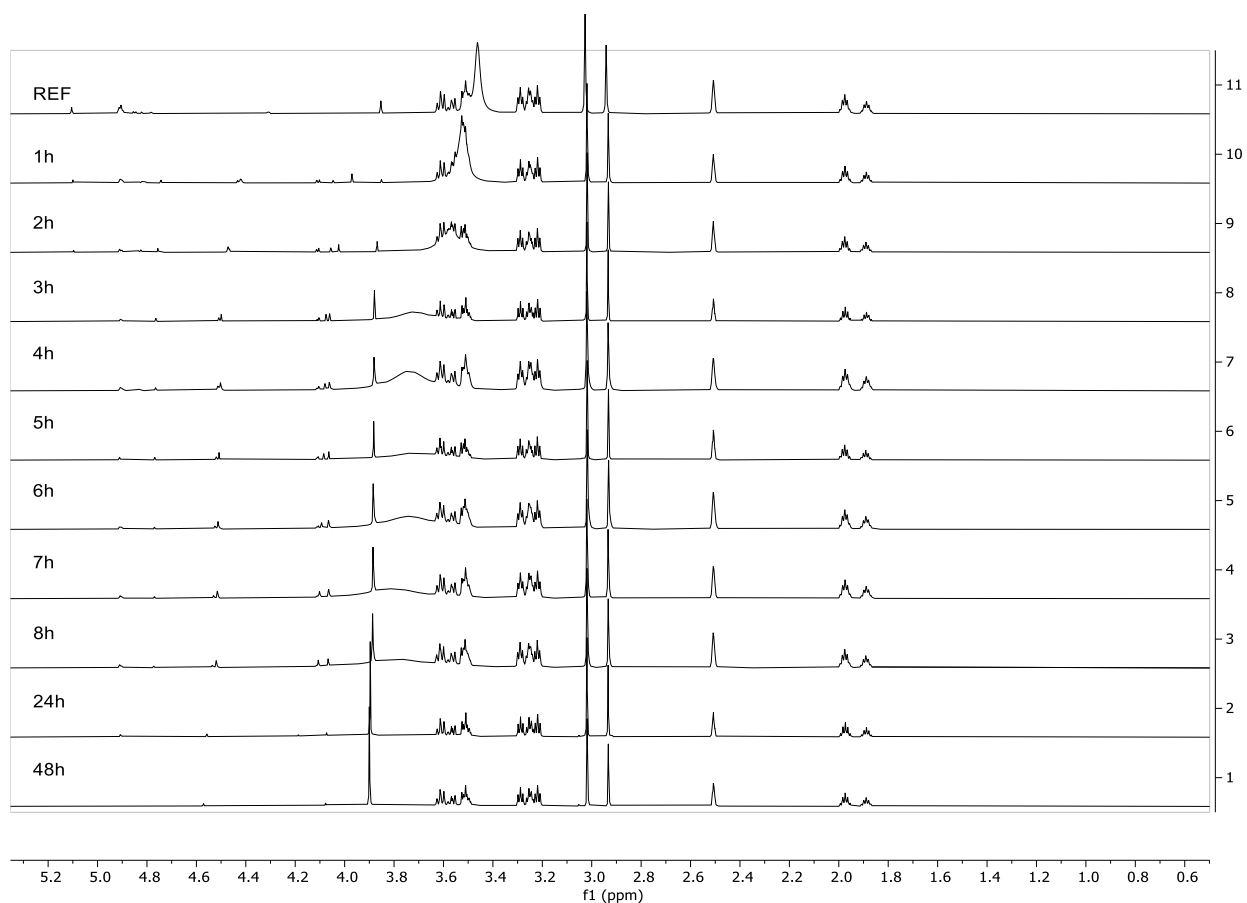

Figure S89  $^1\text{H}$  NMR 1 molar equivalent of  $[\text{mTBNH}][\text{ClOAc}]$  and 5 molar equivalents of water.

| Structure | HT_110 | Integral N-Methyl | Integral N-Methyl | Integral N Methyl total | Integral HP 1 | Integral HP 2 | Integral HP Total | % HP |
|-----------|--------|-------------------|-------------------|-------------------------|---------------|---------------|-------------------|------|
|           | REF    | 44152400.00       | 29862400.00       | 74014800.00             | 0.00          | 0.00          | 0.00              |      |
|           | 1h     | 55578600.00       | 37861300.00       | 93439900.00             | 0.00          | 0.00          | 0.00              | 0.00 |
|           | 2h     | 49818300.00       | 33980600.00       | 83798900.00             | 0.00          | 0.00          | 0.00              | 0.00 |
|           | 3h     | 48734100.00       | 32947500.00       | 81681600.00             | 0.00          | 0.00          | 0.00              | 0.00 |
|           | 4h     | 50054800.00       | 33951500.00       | 84006300.00             | 0.00          | 0.00          | 0.00              | 0.00 |
|           | 5h     | 51267300.00       | 34400700.00       | 85668000.00             | 0.00          | 0.00          | 0.00              | 0.00 |
|           | 6h     | 49420300.00       | 33304400.00       | 82724700.00             | 0.00          | 0.00          | 0.00              | 0.00 |
|           | 7h     | 55917100.00       | 37479400.00       | 93396500.00             | 0.00          | 0.00          | 0.00              | 0.00 |
|           | 8h     | 49287200.00       | 33073000.00       | 82360200.00             | 0.00          | 0.00          | 0.00              | 0.00 |
|           | 24h    | 51774000.00       | 34342900.00       | 86116900.00             | 0.00          | 0.00          | 0.00              | 0.00 |
|           | 48h    | 60739300.00       | 40960300.00       | 101699600.00            | 0.00          | 0.00          | 0.00              | 0.00 |

Table S90 1 molar equivalent of  $[\text{mTBNH}][\text{ClOAc}]$  and 10 molar equivalents of water.

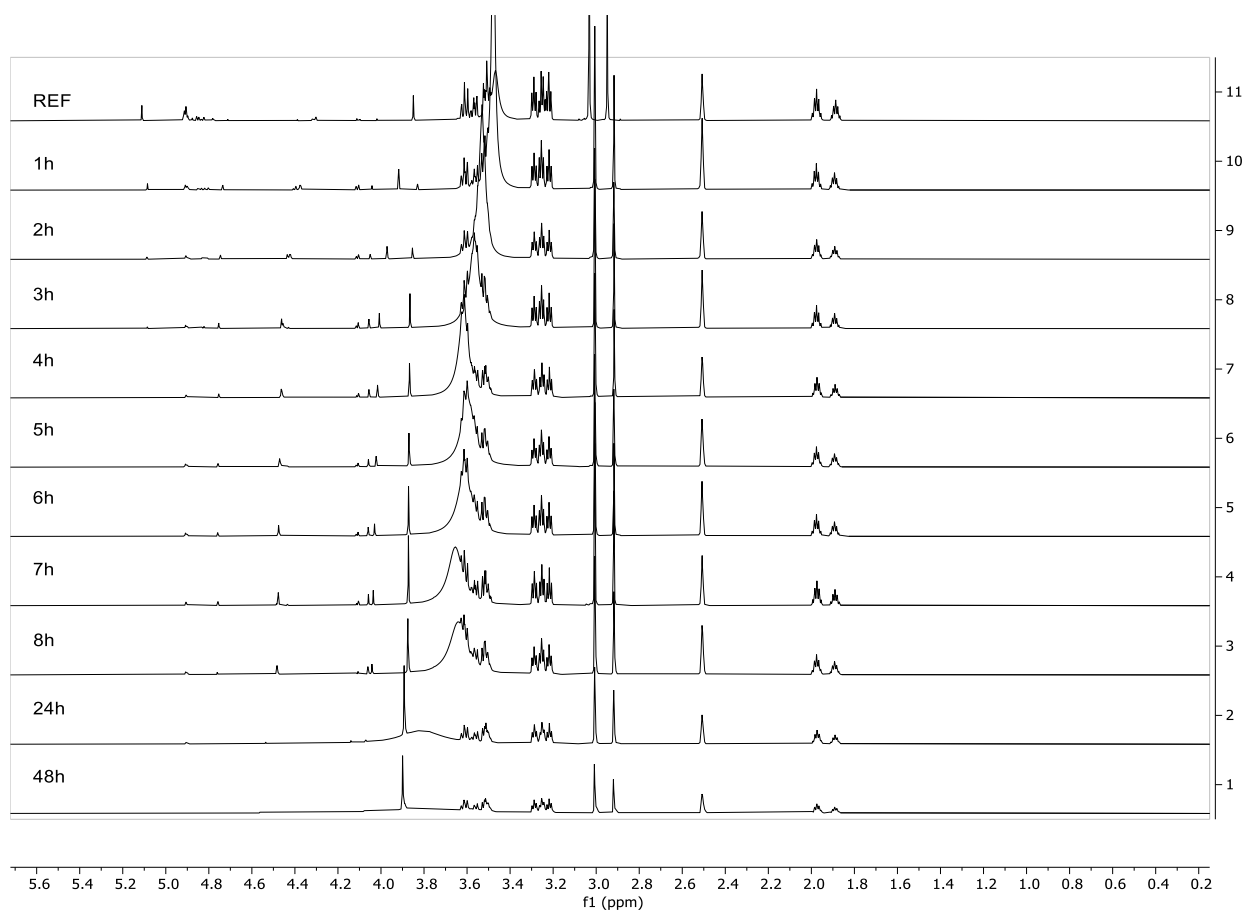

Figure S90  $^1\text{H}$  NMR 1 molar equivalent of  $[\text{mTBNH}][\text{ClOAc}]$  and 10 molar equivalents of water.

e.  $[\text{mTBNH}][\text{Cl}_2\text{OAc}] + \text{water}$

| Structure | Time | Integral N-Methyl 1 | Integral N-Methyl 2 | Integral N Methyl total | Integral HP 1 | Integral HP 2 | Integral HP Total | % HP |
|-----------|------|---------------------|---------------------|-------------------------|---------------|---------------|-------------------|------|
|           | REF  | 49416000.00         | 34589200.00         | 84005200.00             | 0.00          | 0.00          | 0.00              | 0.00 |
|           | 1h   | 53690900.00         | 36806700.00         | 90497600.00             | 0.00          | 0.00          | 0.00              | 0.00 |
|           | 2h   | 53374100.00         | 36748300.00         | 90122400.00             | 0.00          | 0.00          | 0.00              | 0.00 |
|           | 3h   | 56157400.00         | 39395800.00         | 95553200.00             | 0.00          | 0.00          | 0.00              | 0.00 |
|           | 4h   | 55627700.00         | 39705300.00         | 95333000.00             | 0.00          | 0.00          | 0.00              | 0.00 |
|           | 5h   | 56240300.00         | 40415800.00         | 96656100.00             | 0.00          | 0.00          | 0.00              | 0.00 |
|           | 6h   | 62549900.00         | 44395100.00         | 106945000.00            | 0.00          | 0.00          | 0.00              | 0.00 |
|           | 7h   | 69670000.00         | 49756700.00         | 119426700.00            | 0.00          | 0.00          | 0.00              | 0.00 |
|           | 8h   | 68664700.00         | 49462300.00         | 118127000.00            | 0.00          | 0.00          | 0.00              | 0.00 |
|           | 24h  | 55887000.00         | 45729100.00         | 101616100.00            | 0.00          | 0.00          | 0.00              | 0.00 |
|           | 48h  | 60799100.00         | 63193600.00         | 123992700.00            | 0.00          | 0.00          | 0.00              | 0.00 |

Table S91 1 molar equivalent of  $[\text{mTBNH}][\text{Cl}_2\text{OAc}]$  and 0.2 molar equivalents of water.

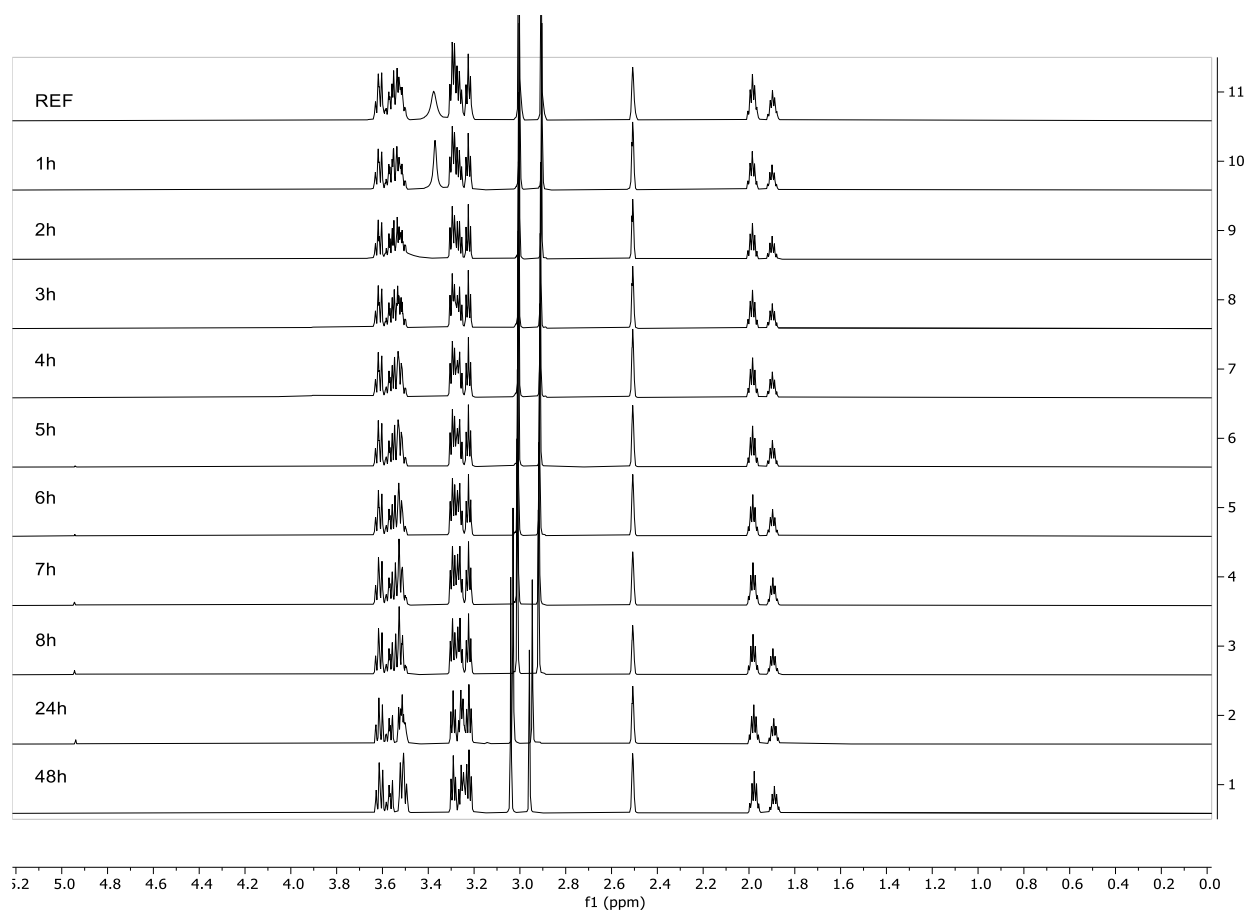

Figure S91 <sup>1</sup>H NMR 1 molar equivalent of [mTBNH][Cl<sub>2</sub>OAc] and 0.2 molar equivalents of water.

| Structure | Time | Integral N-Methyl | Integral N-Methyl | Integral N Methyl total | Integral HP 1 | Integral HP 2 | Integral HP Total | % HP |
|-----------|------|-------------------|-------------------|-------------------------|---------------|---------------|-------------------|------|
|           | REF  | 58972100.00       | 39794100          | 98766200.00             | 0.00          | 0.00          | 0.00              | 0.00 |
|           | 1h   | 60670600.00       | 40671400          | 101342000.00            | 0.00          | 0.00          | 0.00              | 0.00 |
|           | 2h   | 67166100.00       | 45692700          | 112858800.00            | 0.00          | 0.00          | 0.00              | 0.00 |
|           | 3h   | 61292900.00       | 41539100          | 102832000.00            | 0.00          | 0.00          | 0.00              | 0.00 |
|           | 4h   | 59335600.00       | 40555000          | 99890600.00             | 0.00          | 0.00          | 0.00              | 0.00 |
|           | 5h   | 60120700.00       | 41172200          | 101292900.00            | 0.00          | 0.00          | 0.00              | 0.00 |
|           | 6h   | 67885000.00       | 46948000          | 114833000.00            | 0.00          | 0.00          | 0.00              | 0.00 |
|           | 7h   | 63554300.00       | 43095700          | 106650000.00            | 0.00          | 0.00          | 0.00              | 0.00 |
|           | 8h   | 54637500.00       | 37831600          | 92469100.00             | 0.00          | 0.00          | 0.00              | 0.00 |
|           | 24h  | 57165700.00       | 42627000          | 99792700.00             | 0.00          | 0.00          | 0.00              | 0.00 |
|           | 48h  | 60992700.00       | 46202700          | 107195400.00            | 0.00          | 0.00          | 0.00              | 0.00 |

Table S92 1 molar equivalent of [mTBNH][Cl<sub>2</sub>OAc] and 0.5 molar equivalents of water.

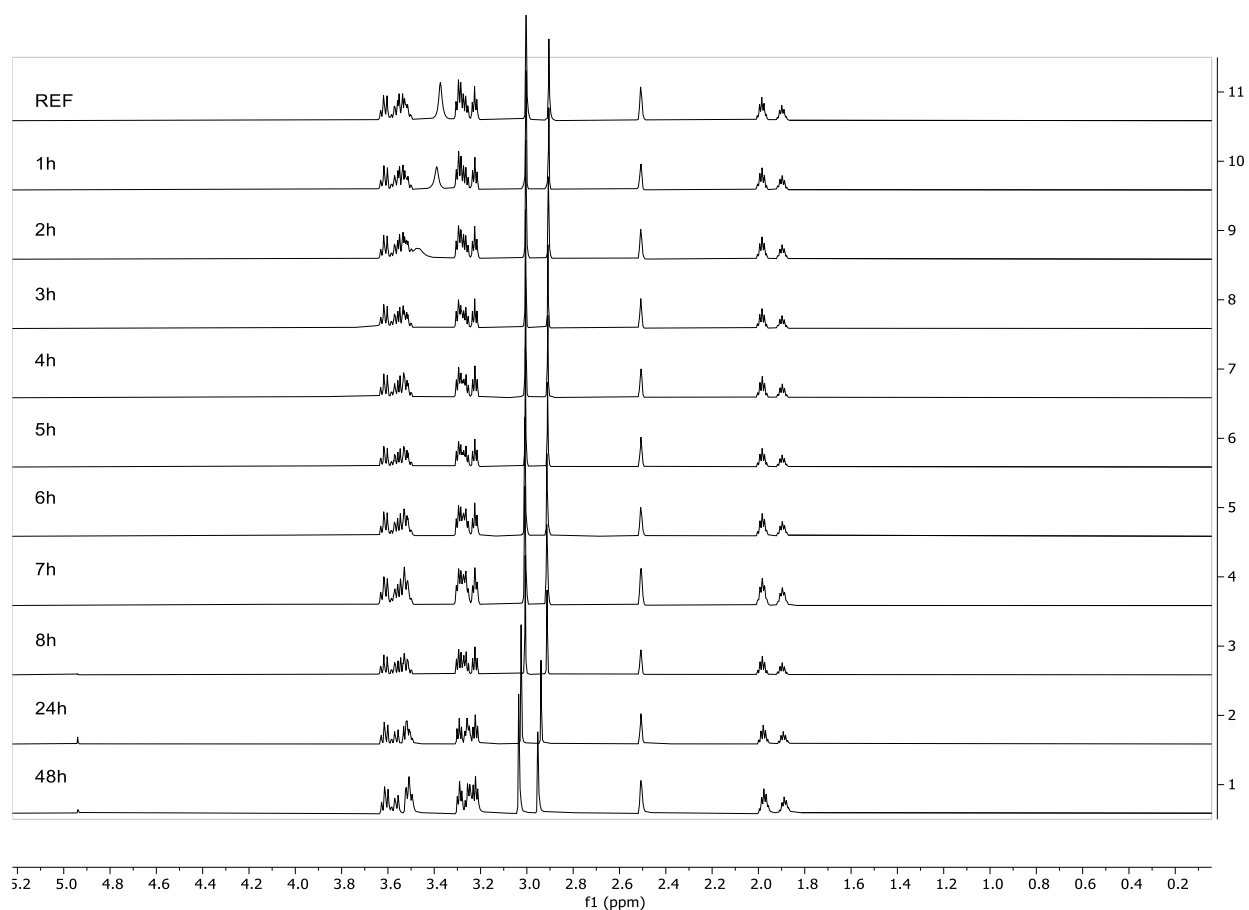

Figure S92 <sup>1</sup>H NMR 1 molar equivalent of [mTBNH][Cl<sub>2</sub>OAc] and 0.5 molar equivalents of water.

| Structure | Time | Integral N-Methyl | Integral N-Methyl | Integral N Methyl total | Integral HP 1 | Integral HP 2 | Integral HP Total | % HP |
|-----------|------|-------------------|-------------------|-------------------------|---------------|---------------|-------------------|------|
|           | REF  | 53584700.00       | 36078000.00       | 89662700.00             | 0.00          | 0.00          | 0.00              | 0.00 |
|           | 1h   | 60230500.00       | 40593300.00       | 100823800.00            | 0.00          | 0.00          | 0.00              | 0.00 |
|           | 2h   | 50106400.00       | 33874600.00       | 83981000.00             | 0.00          | 0.00          | 0.00              | 0.00 |
|           | 3h   | 54275500.00       | 36697000.00       | 90972500.00             | 0.00          | 0.00          | 0.00              | 0.00 |
|           | 4h   | 58302700.00       | 39503900.00       | 97806600.00             | 0.00          | 0.00          | 0.00              | 0.00 |
|           | 5h   | 53256900.00       | 35963800.00       | 89220700.00             | 0.00          | 0.00          | 0.00              | 0.00 |
|           | 6h   | 58406800.00       | 39976000.00       | 98382800.00             | 0.00          | 0.00          | 0.00              | 0.00 |
|           | 7h   | 49470600.00       | 33425500.00       | 82896100.00             | 0.00          | 0.00          | 0.00              | 0.00 |
|           | 24h  | 58567800.00       | 39744700.00       | 98312500.00             | 0.00          | 0.00          | 0.00              | 0.00 |
|           | 48h  | 57530800.00       | 39998900.00       | 97529700.00             | 0.00          | 0.00          | 0.00              | 0.00 |

Table S93 1 molar equivalent of [mTBNH][Cl<sub>2</sub>OAc] and 1 molar equivalents of water.

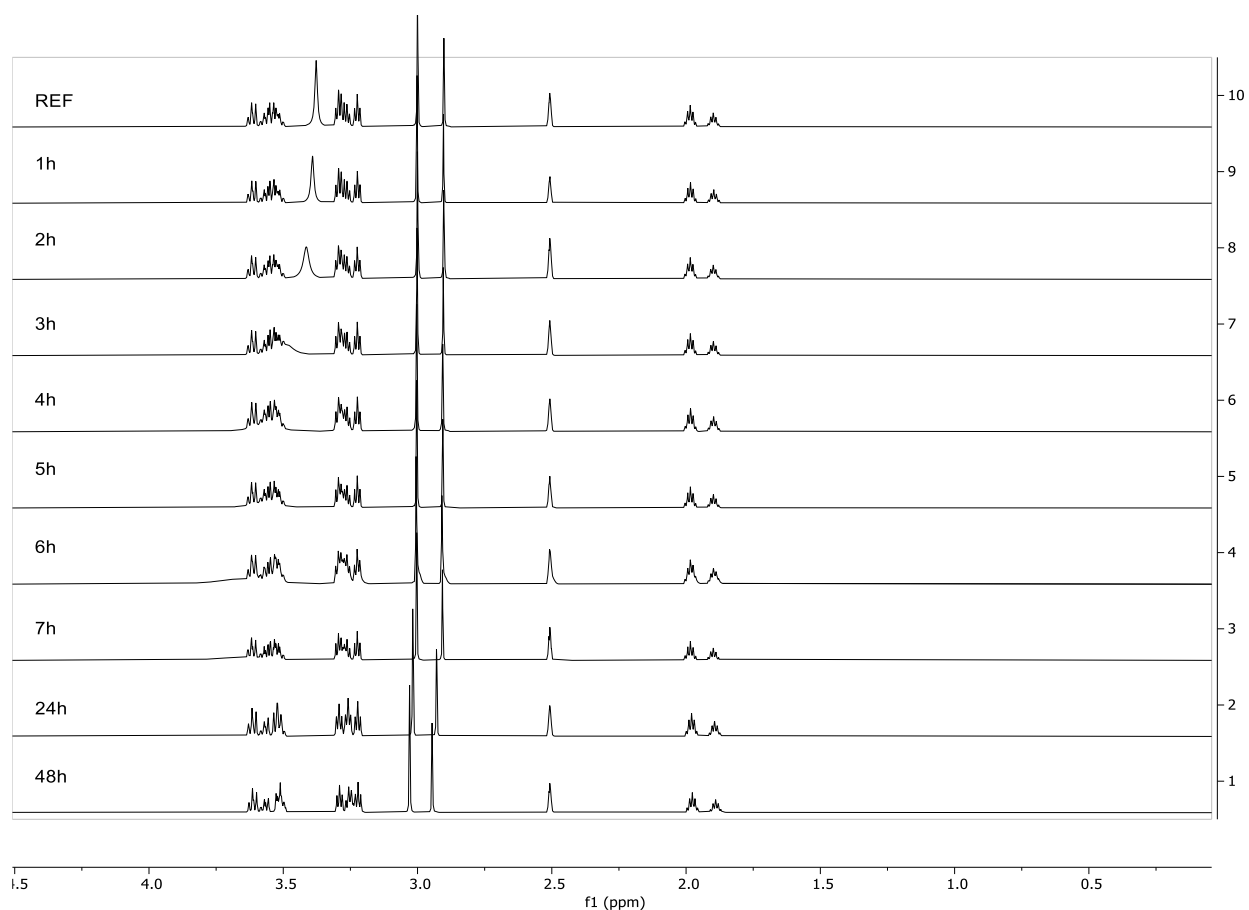

Figure S93  $^1\text{H}$  NMR 1 molar equivalent of  $[\text{mTBNH}][\text{Cl}_2\text{OAc}]$  and 1 molar equivalents of water.

| Structure | Time | Integral N-Methyl | Integral N-Methyl | Integral N Methyl total | Integral HP 1 | Integral HP 2 | Integral HP Total | % HP |
|-----------|------|-------------------|-------------------|-------------------------|---------------|---------------|-------------------|------|
|           | REF  | 48730000.00       | 32702000.00       | 81432000.00             | 0.00          | 0.00          | 0.00              | 0.00 |
|           | 1h   | 50781200.00       | 33994000.00       | 84775200.00             | 0.00          | 0.00          | 0.00              | 0.00 |
|           | 2h   | 47436800.00       | 31866000.00       | 79302800.00             | 0.00          | 0.00          | 0.00              | 0.00 |
|           | 3h   | 47653700.00       | 32029000.00       | 79682700.00             | 0.00          | 0.00          | 0.00              | 0.00 |
|           | 4h   | 43698700.00       | 29351200.00       | 73049900.00             | 0.00          | 0.00          | 0.00              | 0.00 |
|           | 6h   | 23030900.00       | 15418100.00       | 38449000.00             | 0.00          | 0.00          | 0.00              | 0.00 |
|           | 7h   | 48196200.00       | 32344900.00       | 80541100.00             | 0.00          | 0.00          | 0.00              | 0.00 |
|           | 8h   | 44839900.00       | 30087300.00       | 74927200.00             | 0.00          | 0.00          | 0.00              | 0.00 |
|           | 24h  | 51202100.00       | 35055500.00       | 86257600.00             | 0.00          | 0.00          | 0.00              | 0.00 |
|           | 48h  | 56626500.00       | 39513700.00       | 96140200.00             | 0.00          | 0.00          | 0.00              | 0.00 |

Table S94 1 molar equivalent of  $[\text{mTBNH}][\text{Cl}_2\text{OAc}]$  and 5 molar equivalents of water.

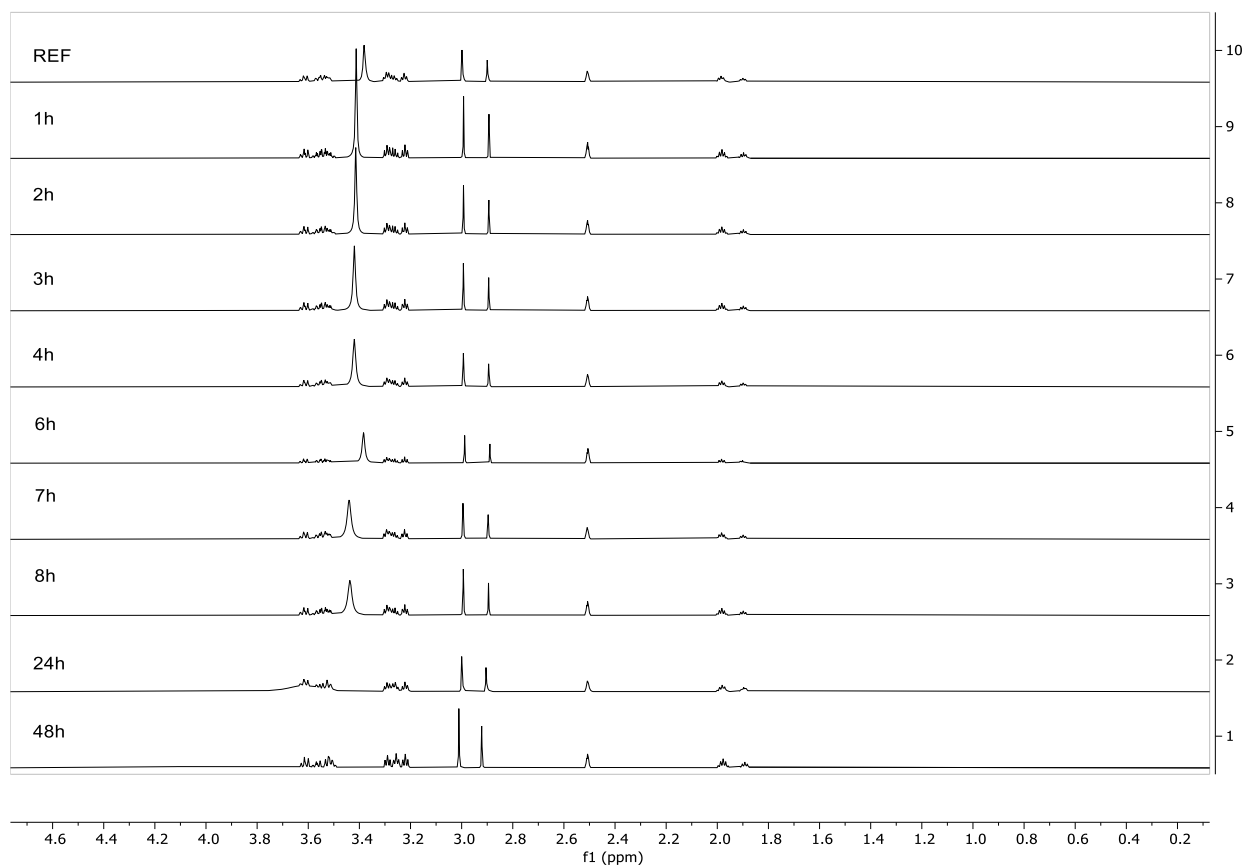

Figure S94  $^1\text{H}$  NMR 1 molar equivalent of  $[\text{mTBNH}][\text{Cl}_2\text{OAc}]$  and 5 molar equivalents of water.

| Structure | Time | Integral N-Methyl | Integral N-Methyl | Integral N-Methyl total | Integral HP 1 | Integral HP 2 | Integral HP Total | % HP |
|-----------|------|-------------------|-------------------|-------------------------|---------------|---------------|-------------------|------|
|           | REF  | 36885200.00       | 24715500.00       | 61600700.00             | 0.00          | 0.00          | 0.00              | 0.00 |
|           | 1h   | 27659700.00       | 18526100.00       | 46185800.00             | 0.00          | 0.00          | 0.00              | 0.00 |
|           | 2h   | 26020000.00       | 17368500.00       | 43388500.00             | 0.00          | 0.00          | 0.00              | 0.00 |
|           | 3h   | 23823600.00       | 15927200.00       | 39750800.00             | 0.00          | 0.00          | 0.00              | 0.00 |
|           | 4h   | 24080000.00       | 16128900.00       | 40208900.00             | 0.00          | 0.00          | 0.00              | 0.00 |
|           | 5h   | 27268600.00       | 18277600.00       | 45546200.00             | 0.00          | 0.00          | 0.00              | 0.00 |
|           | 6h   | 30634700.00       | 20477500.00       | 51112200.00             | 0.00          | 0.00          | 0.00              | 0.00 |
|           | 7h   | 28260400.00       | 18965700.00       | 47226100.00             | 0.00          | 0.00          | 0.00              | 0.00 |
|           | 8h   | 25225600.00       | 16940500.00       | 42166100.00             | 0.00          | 0.00          | 0.00              | 0.00 |
|           | 24h  | 27959400.00       | 19037800.00       | 46997200.00             | 0.00          | 0.00          | 0.00              | 0.00 |
|           | 48h  | 31350400.00       | 21496200.00       | 52846600.00             | 0.00          | 0.00          | 0.00              | 0.00 |

Table S95 1 molar equivalent of  $[\text{mTBNH}][\text{Cl}_2\text{OAc}]$  and 10 molar equivalents of water.

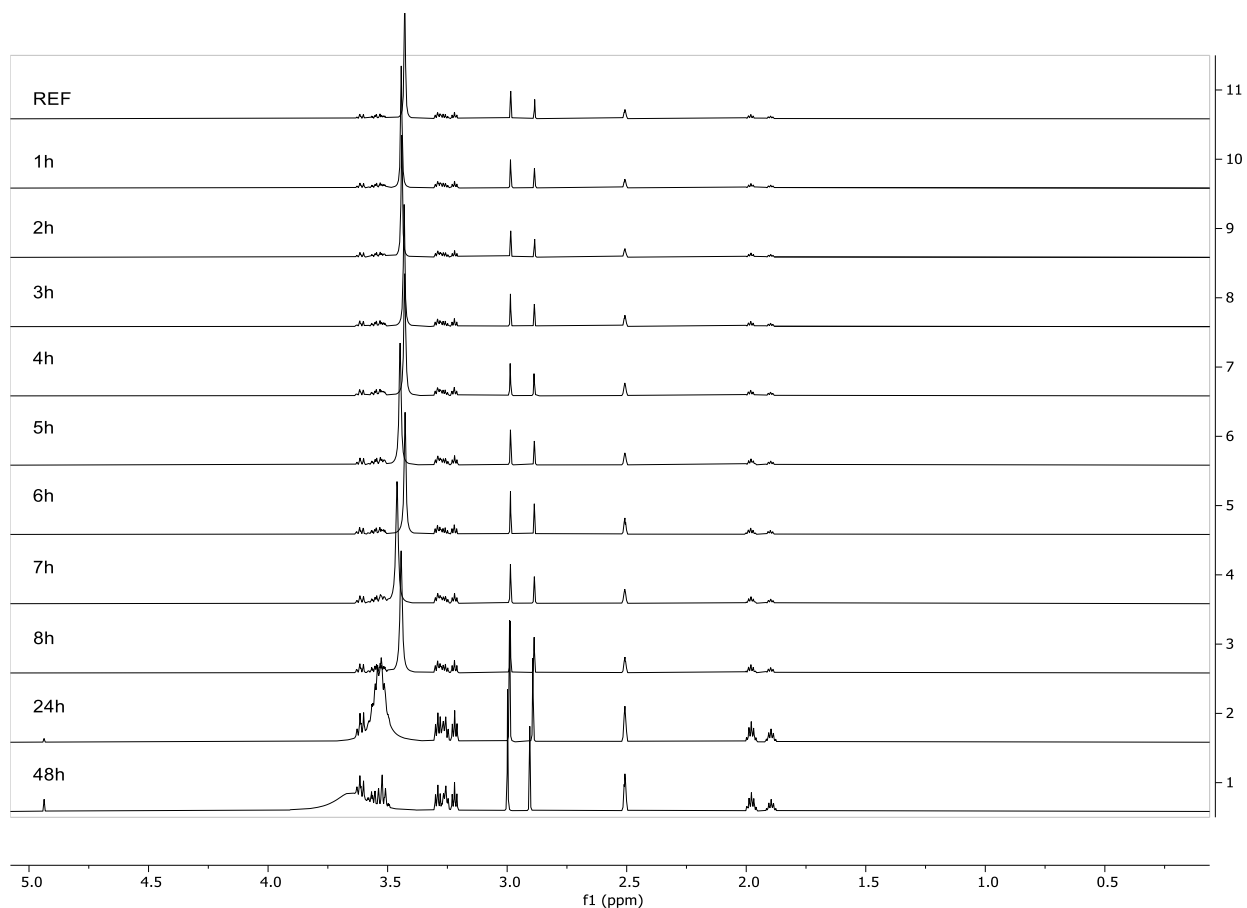

Figure S95  $^1\text{H}$  NMR 1 molar equivalent of  $[\text{mTBNH}][\text{Cl}_2\text{OAc}]$  and 10 molar equivalents of water.

f.  $[\text{mTBNH}][\text{Cl}_3\text{OAc}] + \text{water}$

| Structure | Time | Integral N-Methyl 1 | Integral N-Methyl 2 | Integral N Methyl total | Integral HP 1 | Integral HP 2 | Integral HP Total | % HP |
|-----------|------|---------------------|---------------------|-------------------------|---------------|---------------|-------------------|------|
|           | REF  | 70597300.00         | 48727400.00         | 119324700.00            | 0.00          | 0.00          | 0.00              | 0.00 |
|           | 1h   | 75005000.00         | 53074300.00         | 128079300.00            | 0.00          | 0.00          | 0.00              | 0.00 |
|           | 2h   | 66565900.00         | 47641400.00         | 114207300.00            | 0.00          | 0.00          | 0.00              | 0.00 |
|           | 3h   | 51696200.00         | 37366400.00         | 89062600.00             | 0.00          | 0.00          | 0.00              | 0.00 |
|           | 4h   | 53352400.00         | 38475100.00         | 91827500.00             | 0.00          | 0.00          | 0.00              | 0.00 |
|           | 5h   | 55255700.00         | 40838800.00         | 96094500.00             | 0.00          | 0.00          | 0.00              | 0.00 |
|           | 6h   | 66521800.00         | 49858200.00         | 116380000.00            | 0.00          | 0.00          | 0.00              | 0.00 |
|           | 7h   | 50095100.00         | 37070700.00         | 87165800.00             | 0.00          | 0.00          | 0.00              | 0.00 |
|           | 8h   | 58891000.00         | 46119700.00         | 105010700.00            | 0.00          | 0.00          | 0.00              | 0.00 |
|           | 24h  | 69046100.00         | 51284500.00         | 120330600.00            | 0.00          | 0.00          | 0.00              | 0.00 |
|           | 48h  | 24277300.00         | 18077500.00         | 42354800.00             | 0.00          | 0.00          | 0.00              | 0.00 |

Table S96 1 molar equivalent of  $[\text{mTBNH}][\text{Cl}_3\text{OAc}]$  and 0.2 molar equivalents of water.



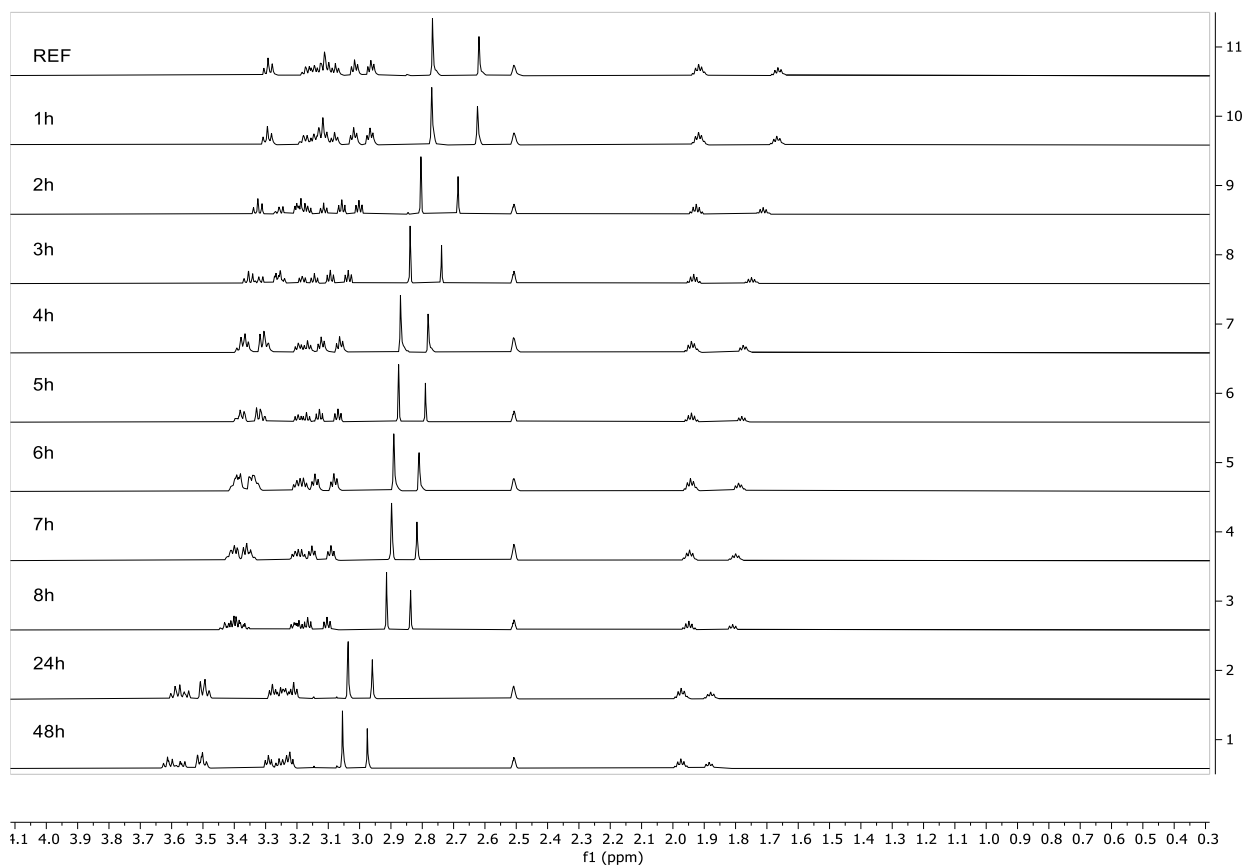

Figure S96  $^1\text{H}$  NMR 1 molar equivalent of  $[\text{mTBNH}][\text{Cl}_3\text{OAc}]$  and 0.2 molar equivalents of water.

| Structure | Time | Integral N-Methyl | Integral N-Methyl | Integral N Methyl total | Integral HP 1 | Integral HP 2 | Integral HP Total | % HP |
|-----------|------|-------------------|-------------------|-------------------------|---------------|---------------|-------------------|------|
|           | REF  | 60311100.00       | 42933300.00       | 103244400.00            | 0.00          | 0.00          | 0.00              | 0.00 |
|           | 1h   | 77361600.00       | 54632500.00       | 131994100.00            | 0.00          | 0.00          | 0.00              | 0.00 |
|           | 2h   | 59379200.00       | 43761800.00       | 103141000.00            | 0.00          | 0.00          | 0.00              | 0.00 |
|           | 3h   | 66249800.00       | 50787700.00       | 117037500.00            | 0.00          | 0.00          | 0.00              | 0.00 |
|           | 4h   | 49749000.00       | 40038100.00       | 89787100.00             | 0.00          | 0.00          | 0.00              | 0.00 |
|           | 5h   | 61127400.00       | 47910200.00       | 109037600.00            | 0.00          | 0.00          | 0.00              | 0.00 |
|           | 6h   | 50391400.00       | 40128400.00       | 90519800.00             | 0.00          | 0.00          | 0.00              | 0.00 |
|           | 7h   | 60366400.00       | 50751900.00       | 111118300.00            | 0.00          | 0.00          | 0.00              | 0.00 |
|           | 8h   | 52655600.00       | 45979500.00       | 98635100.00             | 0.00          | 0.00          | 0.00              | 0.00 |
|           | 24h  | 45872100.00       | 35205900.00       | 81078000.00             | 0.00          | 0.00          | 0.00              | 0.00 |
|           | 48h  | 58240500.00       | 42403400.00       | 100643900.00            | 0.00          | 0.00          | 0.00              | 0.00 |

Table S97 1 molar equivalent of  $[\text{mTBNH}][\text{Cl}_3\text{OAc}]$  and 0.5 molar equivalents of water.

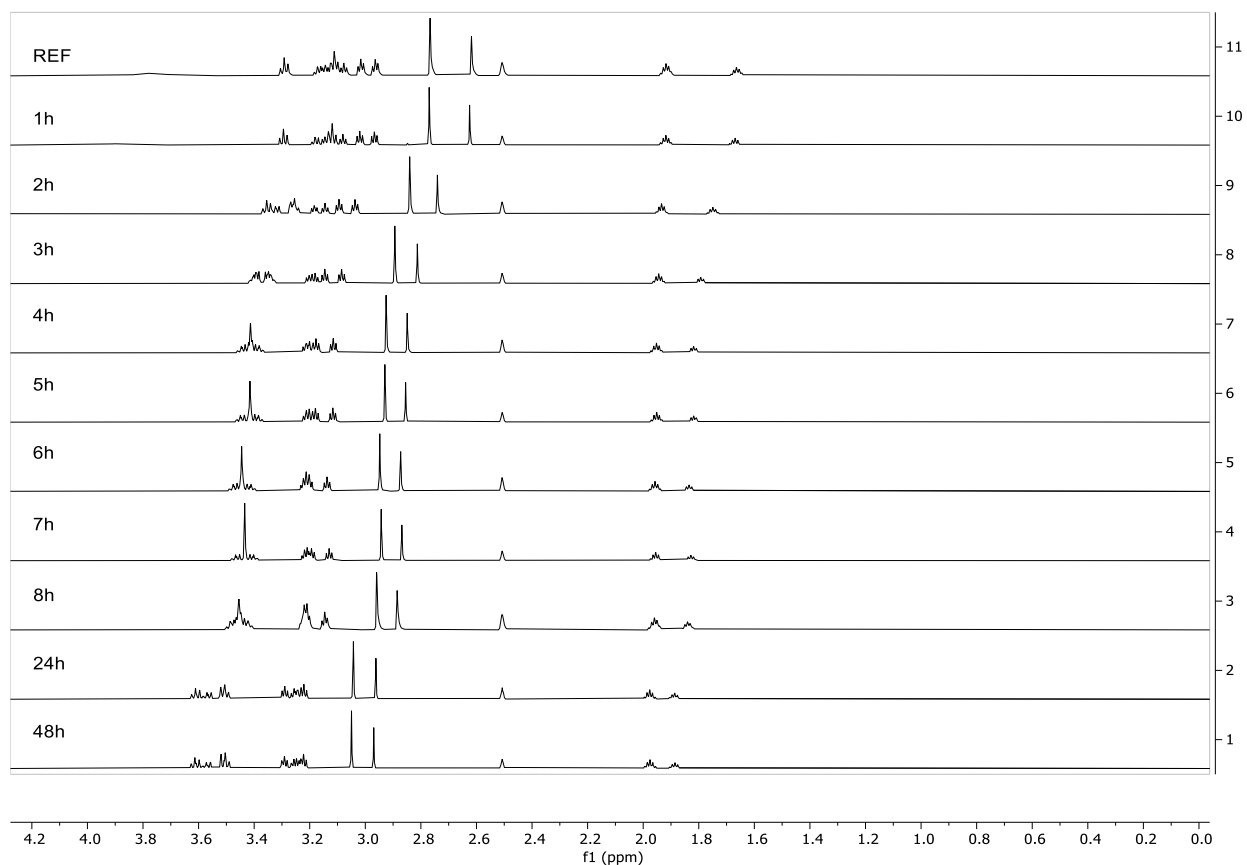

Figure S97 <sup>1</sup>H NMR 1 molar equivalent of [mTBNH][Cl<sub>3</sub>OAc] and 0.5 molar equivalents of water.

| Structure | Time | Integral N-Methyl | Integral N-Methyl | Integral N Methyl total | Integral HP 1 | Integral HP 2 | Integral HP Total | % HP |
|-----------|------|-------------------|-------------------|-------------------------|---------------|---------------|-------------------|------|
|           | REF  | 65028500.00       | 42904400.00       | 107932900.00            | 0.00          | 0.00          | 0.00              | 0.00 |
|           | 1h   | 55118700.00       | 37663400.00       | 92782100.00             | 0.00          | 0.00          | 0.00              | 0.00 |
|           | 2h   | 58843100.00       | 40425500.00       | 99268600.00             | 0.00          | 0.00          | 0.00              | 0.00 |
|           | 3h   | 58808200.00       | 40665100.00       | 99473300.00             | 0.00          | 0.00          | 0.00              | 0.00 |
|           | 4h   | 58013500.00       | 39619700.00       | 97633200.00             | 0.00          | 0.00          | 0.00              | 0.00 |
|           | 5h   | 57359800.00       | 37166300.00       | 94526100.00             | 0.00          | 0.00          | 0.00              | 0.00 |
|           | 6h   | 58818700.00       | 40376200.00       | 99194900.00             | 0.00          | 0.00          | 0.00              | 0.00 |
|           | 7h   | 71732100.00       | 49117800.00       | 120849900.00            | 0.00          | 0.00          | 0.00              | 0.00 |
|           | 8h   | 58468600.00       | 44319600.00       | 102788200.00            | 0.00          | 0.00          | 0.00              | 0.00 |
|           | 24h  | 55578300.00       | 39291600.00       | 94869900.00             | 0.00          | 0.00          | 0.00              | 0.00 |
|           | 48h  | 70409100.00       | 47828200.00       | 118237300.00            | 0.00          | 0.00          | 0.00              | 0.00 |

Table S98 1 molar equivalent of [mTBNH][Cl<sub>3</sub>OAc] and 1 molar equivalent of water.

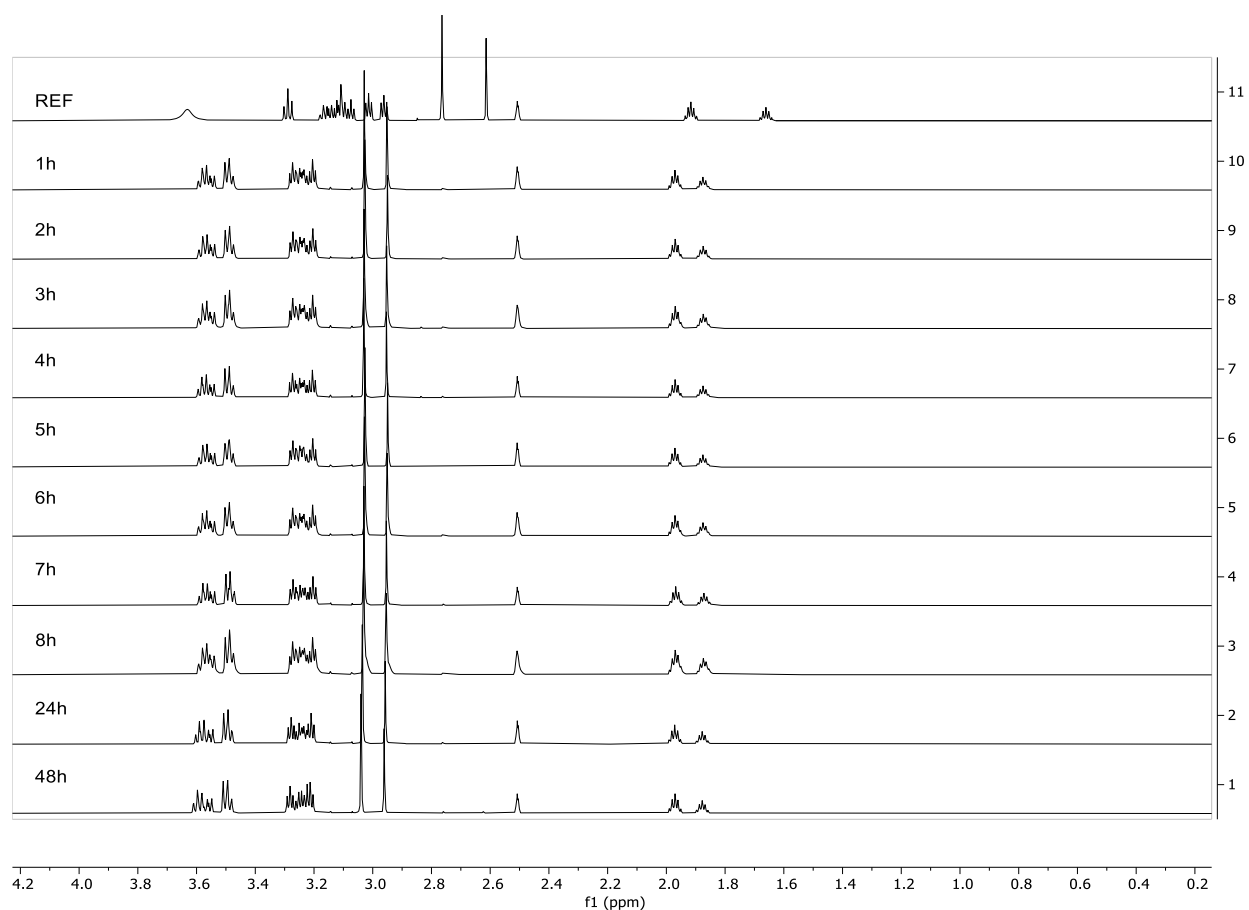

Figure S98  $^1\text{H}$  NMR 1 molar equivalent of  $[\text{mTBNH}][\text{Cl}_3\text{OAc}]$  and 1 molar equivalent of water.

| Structure | Time | Integral N-Methyl | Integral N-Methyl | Integral N Methyl total | Integral HP 1 | Integral HP 2 | Integral HP Total | % HP |
|-----------|------|-------------------|-------------------|-------------------------|---------------|---------------|-------------------|------|
|           | REF  | 51746900.00       | 35079600.00       | 86826500.00             | 0.00          | 0.00          | 0.00              |      |
|           | 1h   | 2443240.00        | 1792960.00        | 4236200.00              | 0.00          | 0.00          | 0.00              | 0.00 |
|           | 2h   | 33470800.00       | 23395900.00       | 56866700.00             | 0.00          | 0.00          | 0.00              | 0.00 |
|           | 3h   | 46053100.00       | 31895800.00       | 77948900.00             | 0.00          | 0.00          | 0.00              | 0.00 |
|           | 4h   | 42228100.00       | 29507400.00       | 71735500.00             | 0.00          | 0.00          | 0.00              | 0.00 |
|           | 5h   | 46695000.00       | 32442000.00       | 79137000.00             | 0.00          | 0.00          | 0.00              | 0.00 |
|           | 6h   | 40791400.00       | 28702100.00       | 69493500.00             | 0.00          | 0.00          | 0.00              | 0.00 |
|           | 7h   | 44255800.00       | 30651400.00       | 74907200.00             | 0.00          | 0.00          | 0.00              | 0.00 |
|           | 8h   | 50818000.00       | 35140200.00       | 85958200.00             | 0.00          | 0.00          | 0.00              | 0.00 |
|           | 24h  | 41950300.00       | 29305700.00       | 71256000.00             | 0.00          | 0.00          | 0.00              | 0.00 |
|           | 48h  | 46762800.00       | 32331500.00       | 79094300.00             | 0.00          | 0.00          | 0.00              | 0.00 |

Table S99 1 molar equivalent of  $[\text{mTBNH}][\text{Cl}_3\text{OAc}]$  and 5 molar equivalents of water.

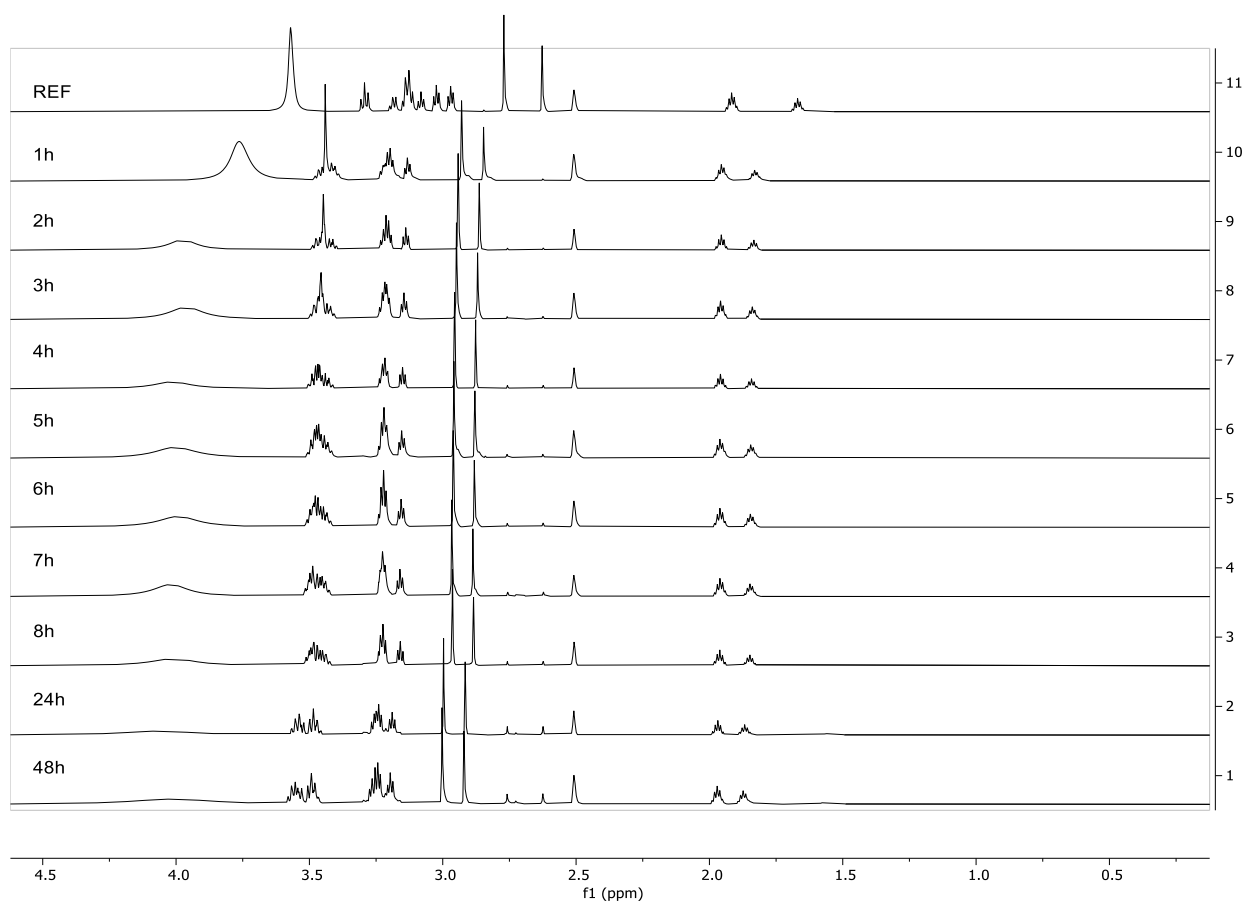

Figure S99 <sup>1</sup>H NMR 1 molar equivalent of [mTBNH][Cl<sub>3</sub>OAc] and 5 molar equivalents of water.

| Structure | Time | integral N-Methyl | integral N-Methyl | integral N-Methyl total | integral HP 1 | integral HP 2 | integral HP Total | % HP |
|-----------|------|-------------------|-------------------|-------------------------|---------------|---------------|-------------------|------|
|           | REF  | 38717300.00       | 25923400.00       | 64640700.00             | 0.00          | 0.00          | 0.00              | 0.00 |
|           | 1h   | 41541900.00       | 27782000.00       | 69323900.00             | 0.00          | 0.00          | 0.00              | 0.00 |
|           | 2h   | 31895600.00       | 21536500.00       | 53432100.00             | 0.00          | 0.00          | 0.00              | 0.00 |
|           | 3h   | 30799600.00       | 20925600.00       | 51725200.00             | 0.00          | 0.00          | 0.00              | 0.00 |
|           | 4h   | 29150500.00       | 19556700.00       | 48707200.00             | 0.00          | 0.00          | 0.00              | 0.00 |
|           | 5h   | 29286600.00       | 20360800.00       | 49647400.00             | 0.00          | 0.00          | 0.00              | 0.00 |
|           | 6h   | 31883300.00       | 22073600.00       | 53956900.00             | 0.00          | 0.00          | 0.00              | 0.00 |
|           | 7h   | 34268800.00       | 23802100.00       | 58070900.00             | 0.00          | 0.00          | 0.00              | 0.00 |
|           | 8h   | 38216100.00       | 26428400.00       | 64644500.00             | 0.00          | 0.00          | 0.00              | 0.00 |
|           | 24h  | 35200300.00       | 25647100.00       | 60847400.00             | 0.00          | 0.00          | 0.00              | 0.00 |
|           | 48h  | 34466100.00       | 25612900.00       | 60079000.00             | 0.00          | 0.00          | 0.00              | 0.00 |

Table S 100 1 molar equivalent of [mTBNH][Cl<sub>3</sub>OAc] and 5 molar equivalents of water.

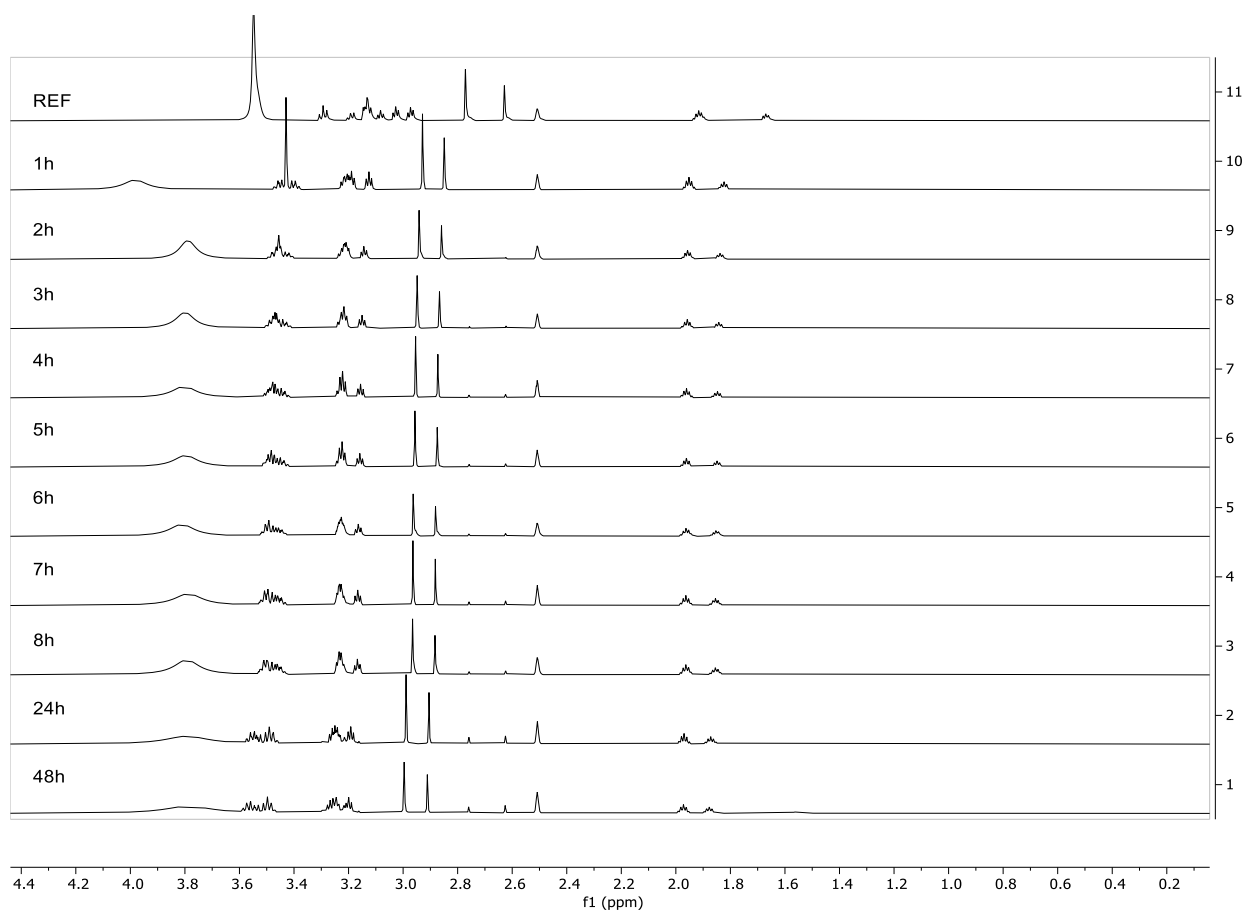

Figure S 100 <sup>1</sup>H NMR 1 molar equivalent of [mTBNH][Cl<sub>3</sub>OAc] and 5 molar equivalents of water.

### 5. mTBO + water

| Structure | Time | Integral N-Methyl | Integral HP1 | Integral HP2 | % HP |
|-----------|------|-------------------|--------------|--------------|------|
|           | REF  | 170737000         | 3060420.00   | 0.00         | 0.0  |
|           | 1h   | 203223000         | 718816.00    | 0.00         | 0.4  |
|           | 2h   | 228050000         | 2002090.00   | 0.00         | 0.9  |
|           | 3h   | 143989000         | 3211590.00   | 0.00         | 2.2  |
|           | 4h   | 143074000         | 1905300.00   | 0.00         | 1.3  |
|           | 5h   | 193733000         | 2442980.00   | 0.00         | 1.2  |
|           | 6h   | 183065000         | 2183950.00   | 0.00         | 1.2  |
|           | 7h   | 210372000         | 1724280.00   | 0.00         | 0.8  |
|           | 8h   | 179768000         | 945788.00    | 0.00         | 0.5  |
|           | 24h  | 145114000         | 2999100.00   | 0.00         | 2.0  |
|           | 48h  | 165322000         | 7689370.00   | 0.00         | 4.4  |

Table S101 1 molar equivalent of mTBO and 0.2 molar equivalent of water.

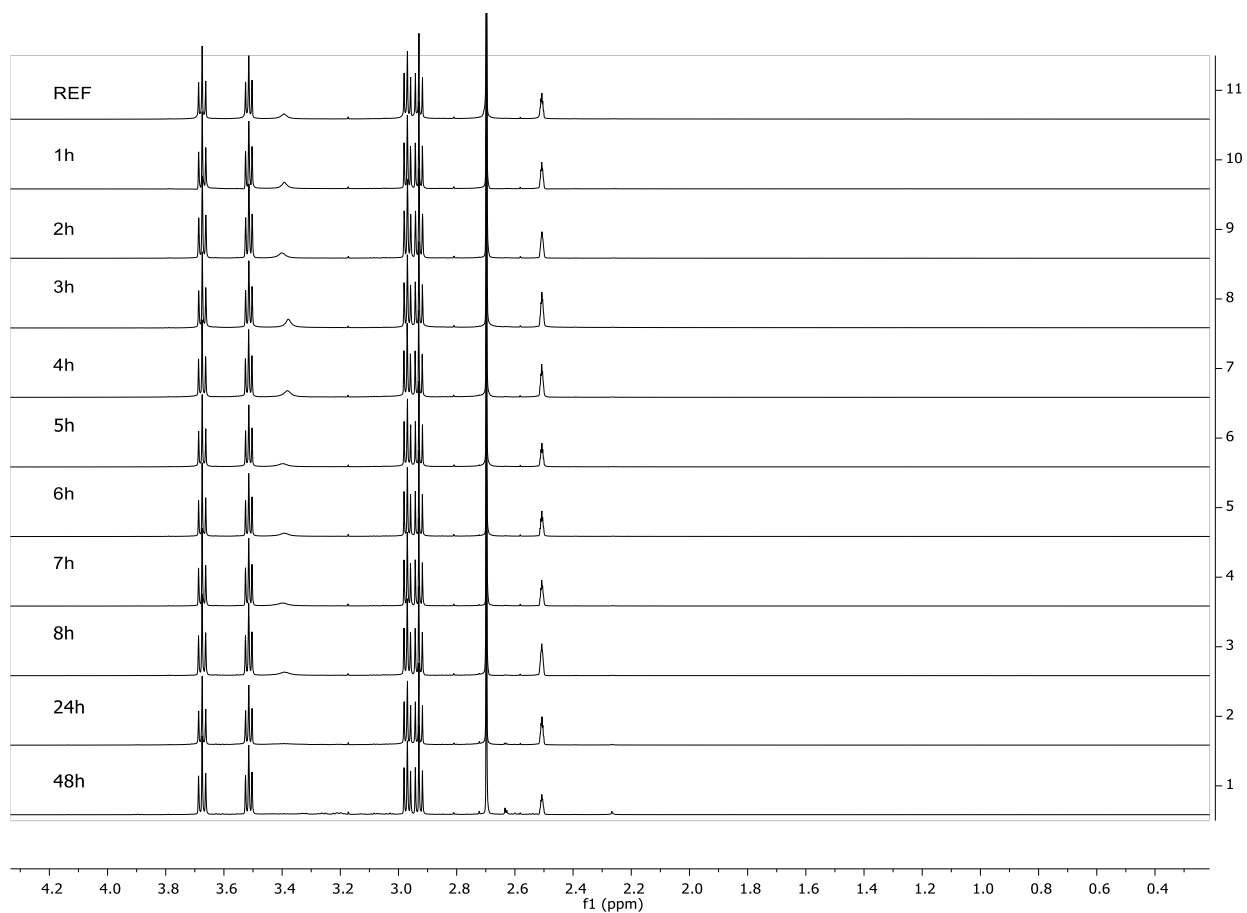

Figure S101  $^1\text{H}$  NMR 1 molar equivalent of mTBO and 0.2 molar equivalent of water.

| Structure | Time | Integral N-Methyl | Integral HP1 | Integral HP2 | % HP |
|-----------|------|-------------------|--------------|--------------|------|
|           | REF  | 261837000         | 1349240      | 0            | 0.5  |
|           | 1h   | 329418000         | 2590250      | 0            | 0.8  |
|           | 2h   | 214141000         | 1093130      | 0            | 0.5  |
|           | 3h   | 429848000         | 4398150      | 0            | 1.0  |
|           | 4h   | 203204000         | 2150660      | 0            | 1.0  |
|           | 5h   | 206288000         | 5014340      | 0            | 2.4  |
|           | 6h   | 268510000         | 6689080      | 0            | 2.4  |
|           | 7h   | 273663000         | 8046830      | 0            | 2.5  |
|           | 8h   | 420836000         | 10935100     | 0            | 2.9  |
|           | 24h  | 463184000         | 32868000     | 0            | 6.6  |
|           | 48h  | 412793000         | 36566700     | 0            | 8.1  |

Table S102 1 molar equivalent of mTBO and 0.5 molar equivalent of water.

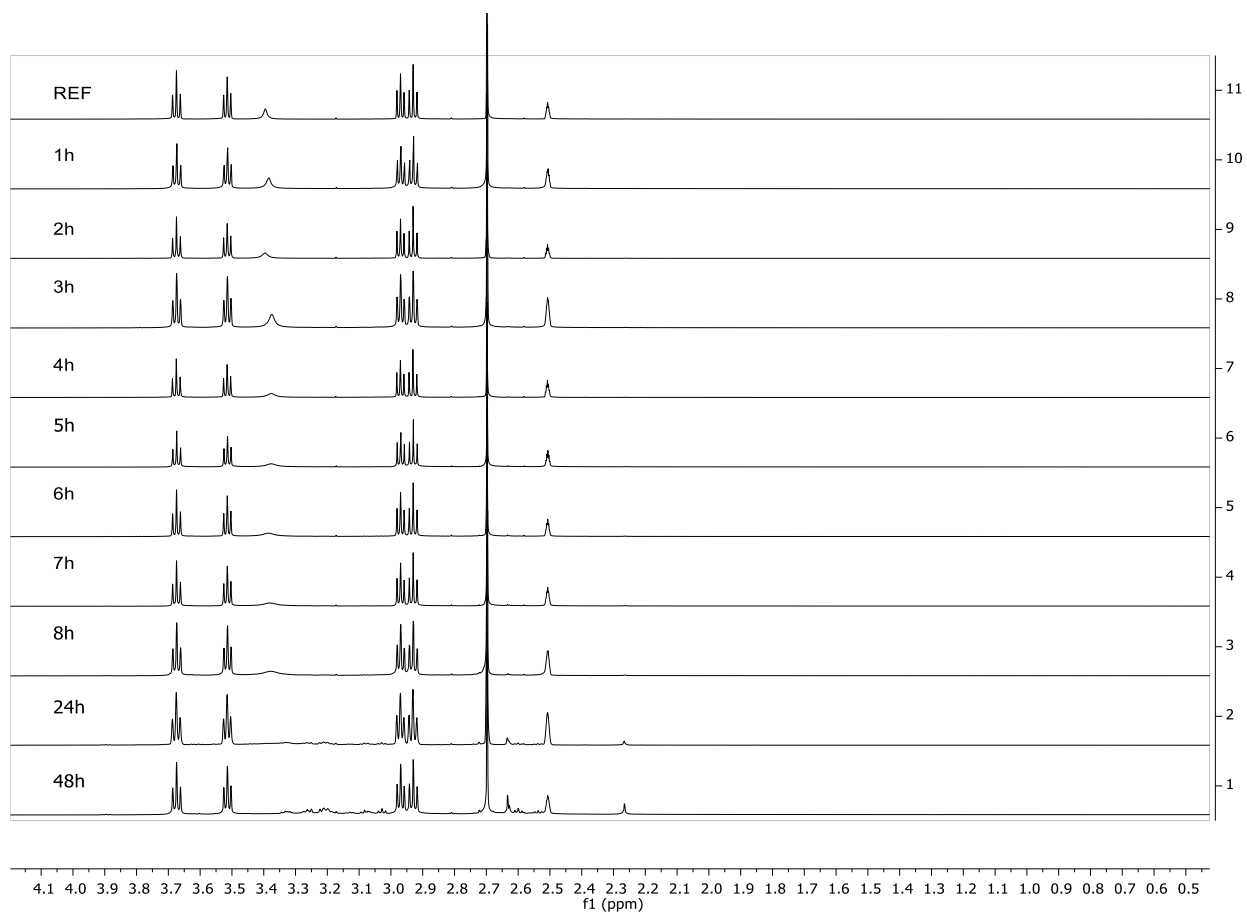

Figure S102  $^1\text{H}$  NMR 1 molar equivalent of mTBO and 0.5 molar equivalent of water.

| Structure | Time | Integral N-Methyl | Integral HP1 | Integral HP2 | % HP |
|-----------|------|-------------------|--------------|--------------|------|
|           | REF  | 167103000.00      | 2765370.00   | 1299810.00   | 0.0  |
|           | 1h   | 162360000.00      | 3564660.00   | 1669860.00   | 3.1  |
|           | 2h   | 131474000.00      | 3284430.00   | 1670490.00   | 3.6  |
|           | 3h   | 143738000.00      | 5054900.00   | 2695360.00   | 4.1  |
|           | 4h   | 184548000.00      | 4735270.00   | 3137220.00   | 5.1  |
|           | 5h   | 158068000.00      | 6618980.00   | 4091120.00   | 6.3  |
|           | 6h   | 154675000.00      | 6341340.00   | 4467220.00   | 6.5  |
|           | 7h   | 125689000.00      | 7134100.00   | 4503110.00   | 8.5  |
|           | 8h   | 117445000.00      | 7168560.00   | 4380260.00   | 9.0  |
|           | 24h  | 121499000.00      | 16543900.00  | 10312700.00  | 18.1 |
|           | 48h  | 118049000.00      | 31372800.00  | 21678500.00  | 31.0 |

Table S103 1 molar equivalent of mTBO and 1 molar equivalent of water.

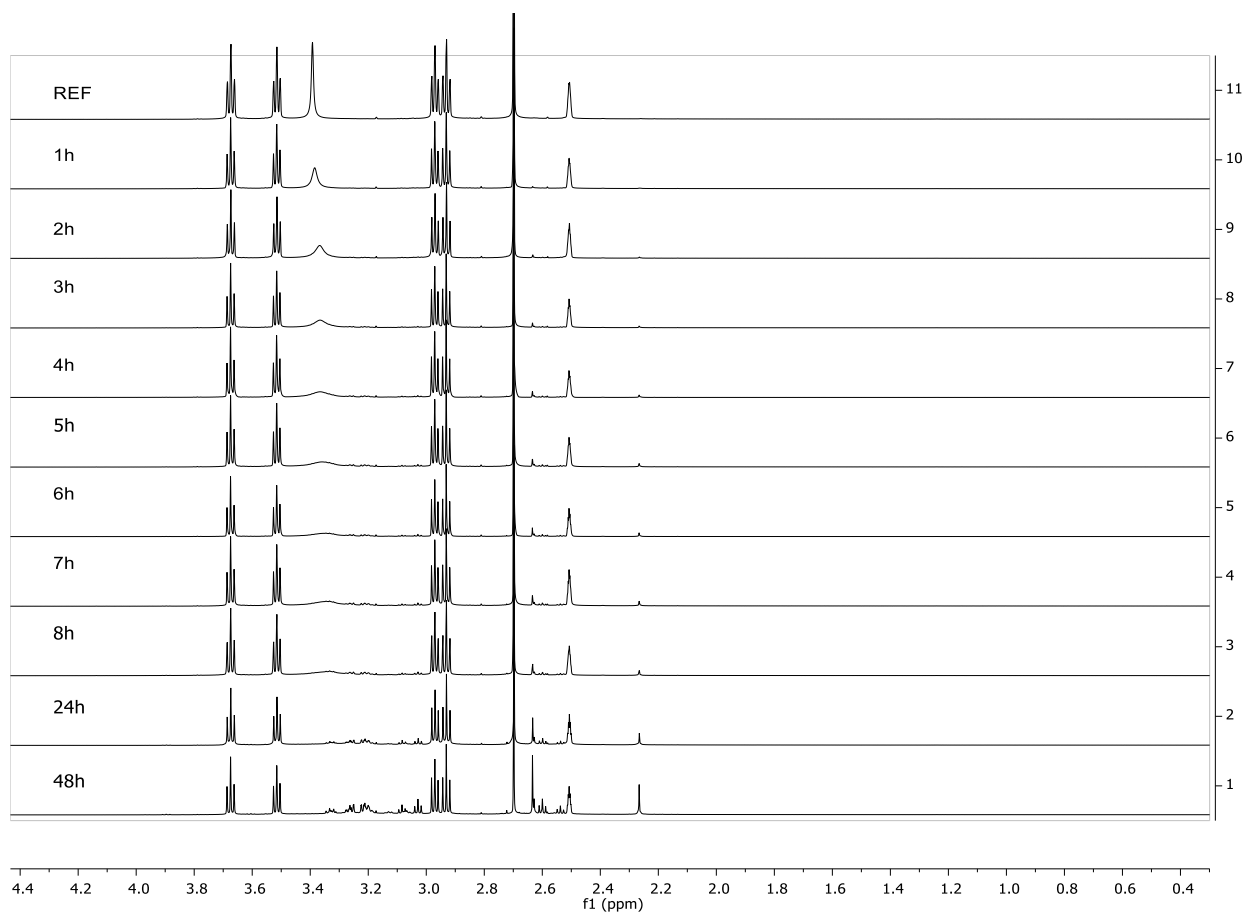

Figure S103 <sup>1</sup>H NMR 1 molar equivalent of mTBO and 1 molar equivalent of water.

| Structure | Time | Integral N-Methyl | Integral HP1 | Integral HP2 | % HP |
|-----------|------|-------------------|--------------|--------------|------|
|           | REF  | 123437000.00      | 0.00         | 0.00         | 0.0  |
|           | 1h   | 83702700.00       | 22357600.00  | 37885700.00  | 41.9 |
|           | 2h   | 42347300.00       | 31422000.00  | 51256100.00  | 66.1 |
|           | 3h   | 24513200.00       | 34236300.00  | 54087300.00  | 78.3 |
|           | 4h   | 15977800.00       | 34110700.00  | 54691200.00  | 84.8 |
|           | 5h   | 16161100.00       | 55367600.00  | 84725700.00  | 89.7 |
|           | 6h   | 13215200.00       | 58669300.00  | 90611800.00  | 91.9 |
|           | 7h   | 8689120.00        | 46008200.00  | 70308600.00  | 93.0 |
|           | 8h   | 3118540.00        | 30651400.00  | 58831200.00  | 96.6 |
|           | 24h  | 3593340.00        | 54163900.00  | 77493000.00  | 96.6 |
|           | 48h  | 4573250.00        | 53574000.00  | 77786500.00  | 97.3 |

Table S104 1 molar equivalent of mTBO and 5 molar equivalents of water.



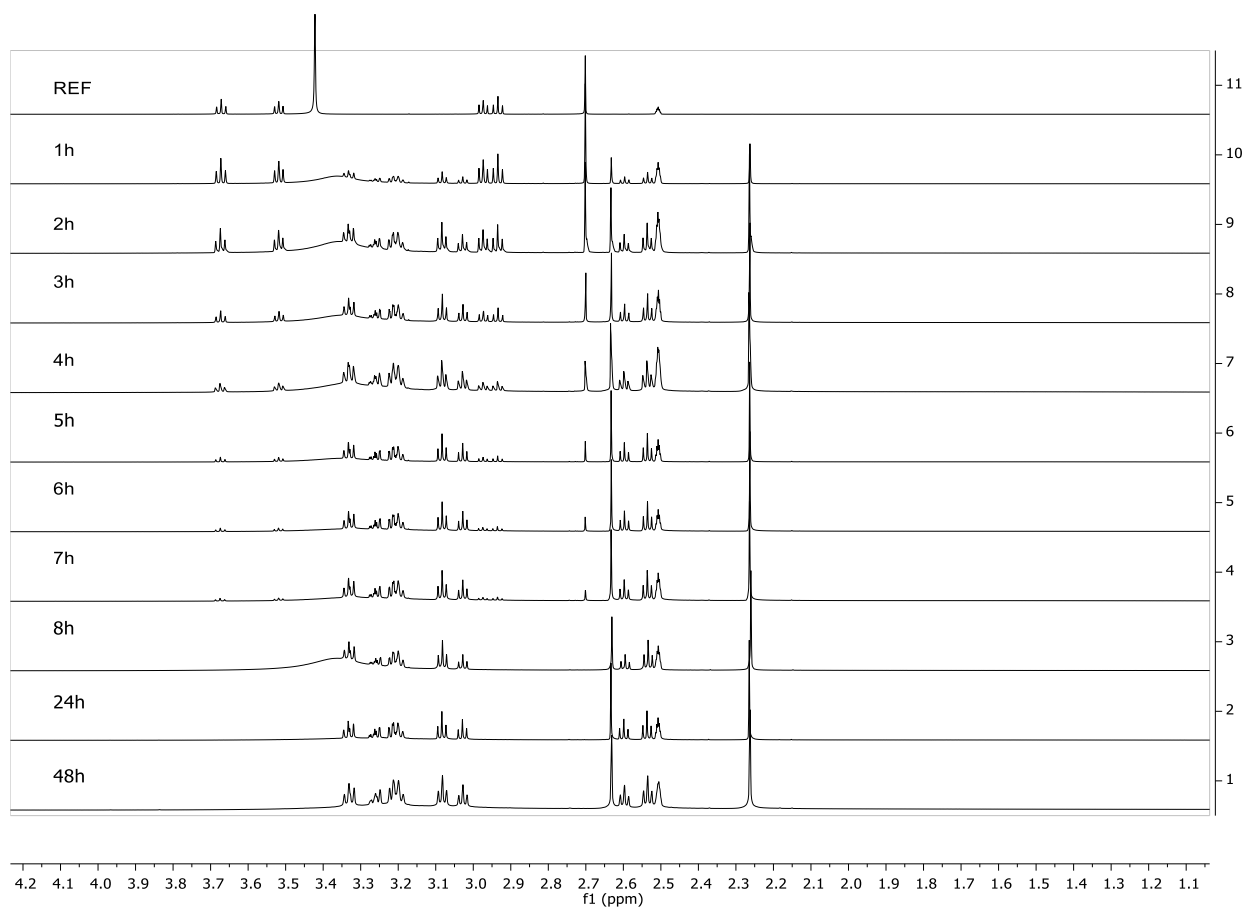

Figure S104 <sup>1</sup>H NMR 1 molar equivalent of mTBO and 5 molar equivalents of water.

| Structure | Time | Integral N-Methyl | Integral HP1 | Integral HP2 | % HP |
|-----------|------|-------------------|--------------|--------------|------|
|           | REF  | 90259500.00       | 0.00         | 0.00         | 0.0  |
|           | 1h   | 28403500.00       | 17177700.00  | 36330700.00  | 65.3 |
|           | 2h   | 11525600.00       | 28152000.00  | 54740400.00  | 87.8 |
|           | 3h   | 6851310.00        | 29718700.00  | 57544900.00  | 92.7 |
|           | 4h   | 4609080.00        | 27211200.00  | 54414400.00  | 94.4 |
|           | 5h   | 3667500.00        | 24963600.00  | 51079200.00  | 94.5 |
|           | 6h   | 4586590.00        | 31848300.00  | 64365900.00  | 94.7 |
|           | 7h   | 5210700.00        | 28876000.00  | 58293800.00  | 95.4 |
|           | 8h   | 4904740.00        | 28580400.00  | 55699300.00  | 95.4 |
|           | 24h  | 3094730.00        | 29720800.00  | 58601600.00  | 96.1 |
|           | 48h  | 3666710.00        | 29977100.00  | 60816000.00  | 96.6 |

Table S105 1 molar equivalent of mTBO and 10 molar equivalents of water.

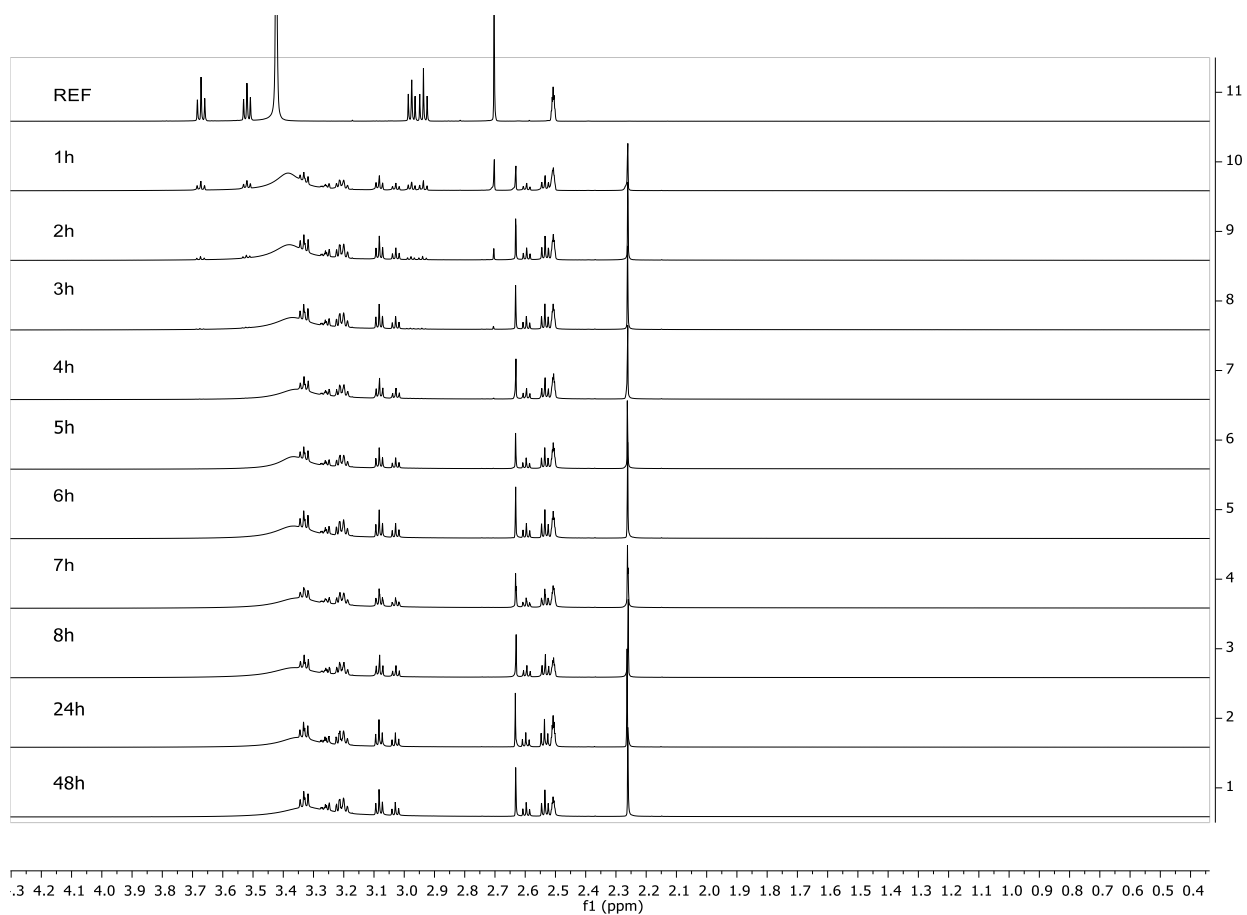

Figure S105 <sup>1</sup>H NMR 1 molar equivalent of mTBO and 10 molar equivalents of water.

### 6. dm39-mTBD + water

| Structure | Time | N-Methyl    | Integral HP1 | Integral HP2 | % HP |
|-----------|------|-------------|--------------|--------------|------|
|           | REF  | 85352178.04 | 0.00         | 0.00         | 0.0  |
|           | 1h   | 84532200.00 | 839102.00    | 603506.00    | 1.7  |
|           | 2h   | 98110600.00 | 1098030.00   | 995408.00    | 2.1  |
|           | 3h   | 96759400.00 | 1219780.00   | 1285490.00   | 2.5  |
|           | 4h   | 93399000.00 | 957765.00    | 1412110.00   | 2.5  |
|           | 5h   | 76445100.00 | 1155550.00   | 1814960.00   | 3.7  |
|           | 6h   | 90863800.00 | 2029840.00   | 3699780.00   | 5.9  |
|           | 24h  | 46773300.00 | 3454810.00   | 8262060.00   | 20.0 |
|           | 48h  | 325871.00   | 7416920.00   | 10095600.00  | 98.2 |

Table S106 1 molar equivalent of dm39-mTBD and 1 molar equivalent of water.

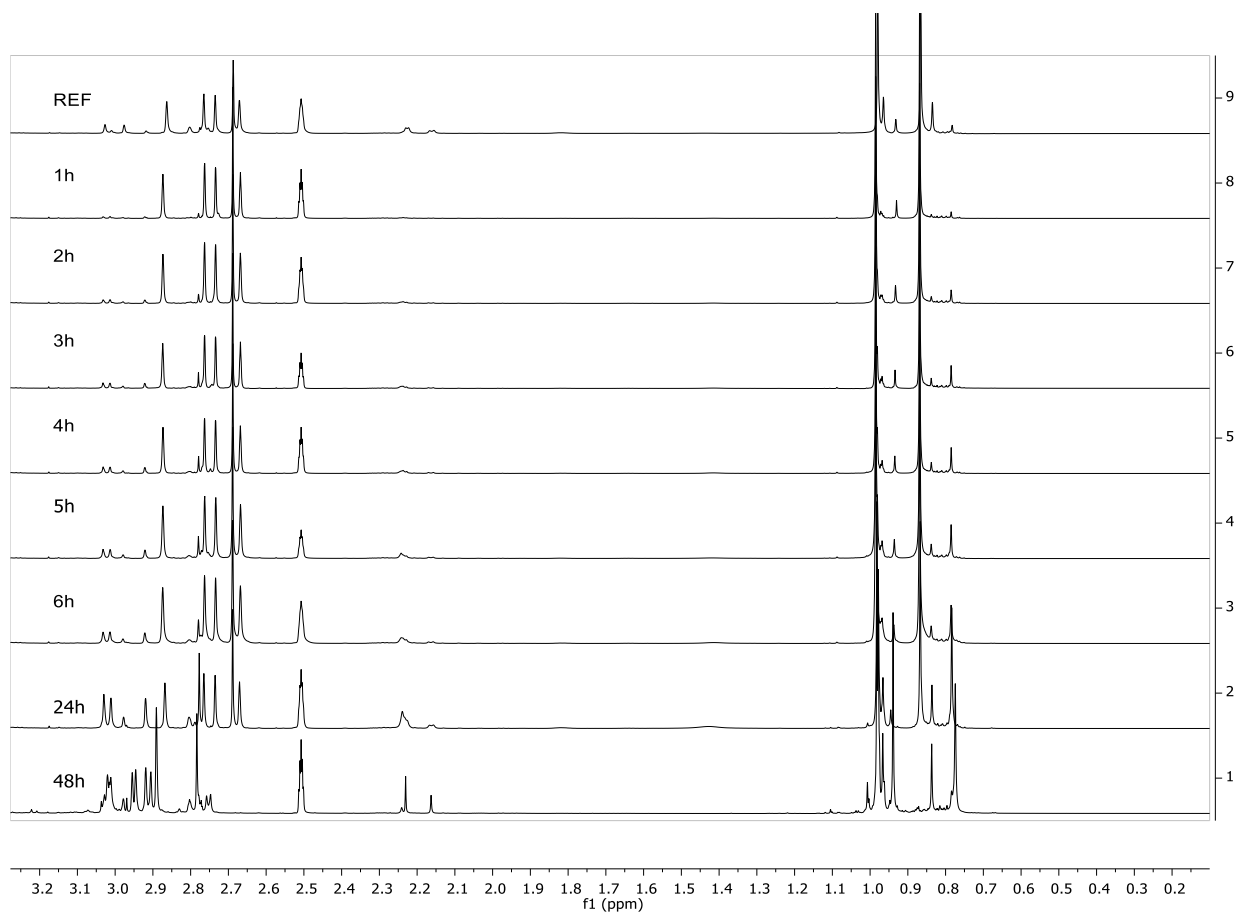

Figure S106 <sup>1</sup>H NMR 1 molar equivalent of dm39-mTBD and 1 molar equivalent of water.

| Structure | Time | N-Methyl    | Integral HP1 | Integral HP2 | % HP |
|-----------|------|-------------|--------------|--------------|------|
|           | REF  | 32751400.00 | 70108.20     | 25873.30     | 0.0  |
|           | 1h   | 35756500.00 | 10127900.00  | 10432500.00  | 0.3  |
|           | 2h   | 14356500.00 | 20557000.00  | 23266600.00  | 36.5 |
|           | 3h   | 8210260.00  | 27552200.00  | 39683900.00  | 75.3 |
|           | 4h   | 5866660.00  | 27222400.00  | 38416900.00  | 89.1 |
|           | 5h   | 4912980.00  | 31331300.00  | 45758200.00  | 91.8 |
|           | 6h   | 4285670.00  | 34932400.00  | 51141800.00  | 94.0 |
|           | 24h  | 200779.00   | 33766500.00  | 49383400.00  | 95.3 |
|           | 48h  | 46737.40    | 30307600.00  | 44827900.00  | 99.8 |

Table S107 1 molar equivalent of dm39-mTBD and 5 molar equivalents of water.

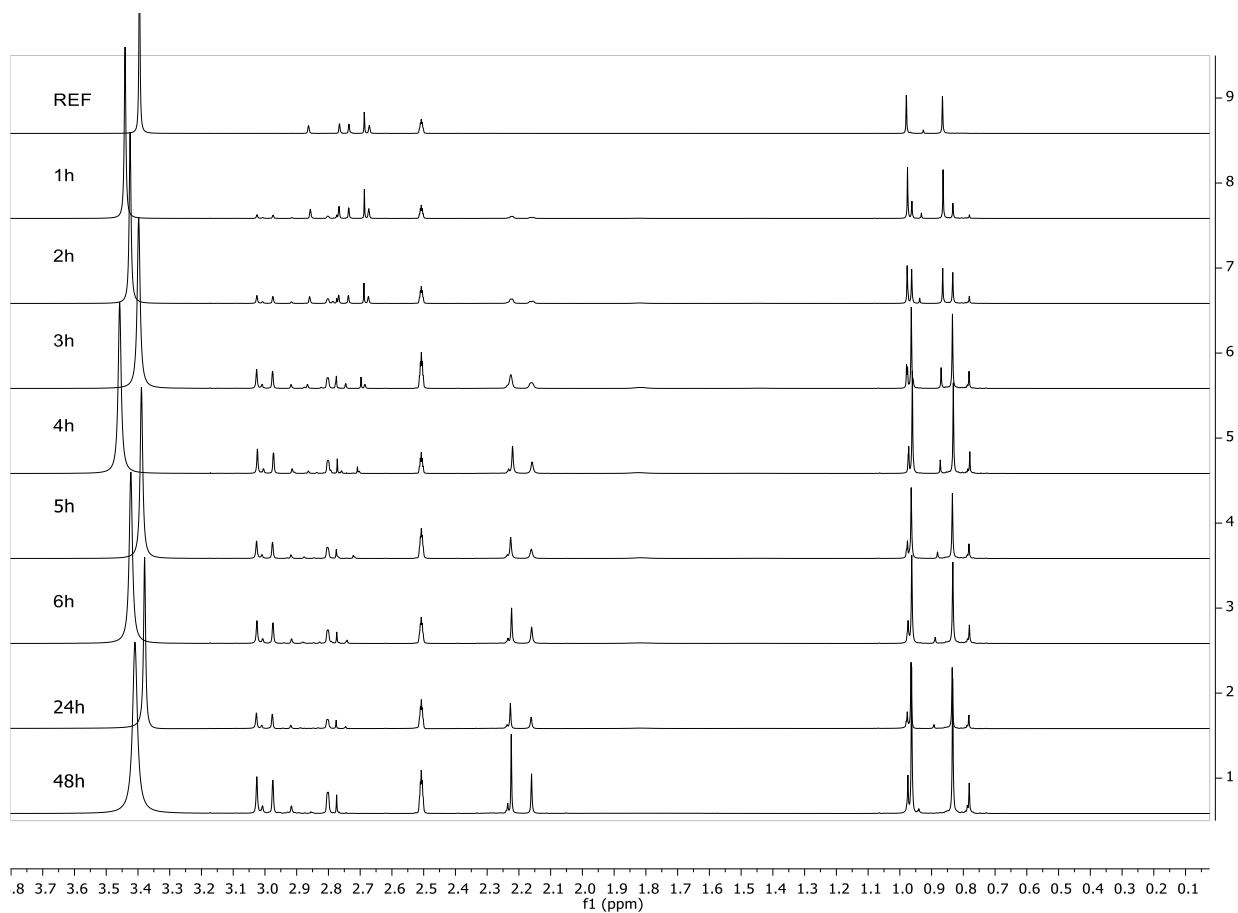

Figure S107  $^1\text{H}$  NMR 1 molar equivalent of dm39-mTBD and 5 molar equivalents of water.

| Structure | Time | N-Methyl    | Integral HP1 | Integral HP2 | % HP  |
|-----------|------|-------------|--------------|--------------|-------|
|           | REF  | 41412400.00 | 0.00         | 0.00         | 0.0   |
|           | 1h   | 33629400.00 | 15152500.00  | 8657860.00   | 41.5  |
|           | 2h   | 18910000.00 | 24753600.00  | 14257300.00  | 67.4  |
|           | 3h   | 1858860.00  | 28965800.00  | 16770600.00  | 96.1  |
|           | 4h   | 159613.00   | 45950200.00  | 26667300.00  | 99.8  |
|           | 5h   | 114750.00   | 42735200.00  | 24485900.00  | 99.8  |
|           | 6h   | 167893      | 49105900.00  | 28352300.00  | 99.8  |
|           | 24h  | 87826.50    | 45154700.00  | 26062100.00  | 99.9  |
|           | 48h  | 7638.89     | 45238300.00  | 24934100.00  | 100.0 |

Table S108 1 molar equivalent of dm39-mTBD and 10 molar equivalents of water.

### 7. [dm39-mTBDH][OAc] + water

| Structure | Time | Integral acetate | Integral HP1 | Integral HP2 | % HP |
|-----------|------|------------------|--------------|--------------|------|
|           | REF  | 111981000.00     | 8817.60      | 16283.80     | 0.0  |
|           | 1h   | 106531000.00     | 136093.00    | 533505.00    | 0.6  |
|           | 2h   | 111298000.00     | 333511.00    | 857829.00    | 1.1  |
|           | 3h   | 103761000.00     | 756007.00    | 1505570.00   | 2.1  |
|           | 4h   | 111628000.00     | 846729.00    | 1585400.00   | 2.1  |
|           | 5h   | 102269000.00     | 973053.00    | 1639830.00   | 2.5  |

|  |     |              |             |             |      |
|--|-----|--------------|-------------|-------------|------|
|  | 6h  | 105335000.00 | 1333910.00  | 1897750.00  | 3.0  |
|  | 24h | 105307000.00 | 4478140.00  | 6301890.00  | 9.3  |
|  | 48h | 98609200.00  | 12351600.00 | 18392700.00 | 23.8 |

Table S109 1 molar equivalent of [dm39-mTBDH][OAc] and 1 molar equivalent of water.

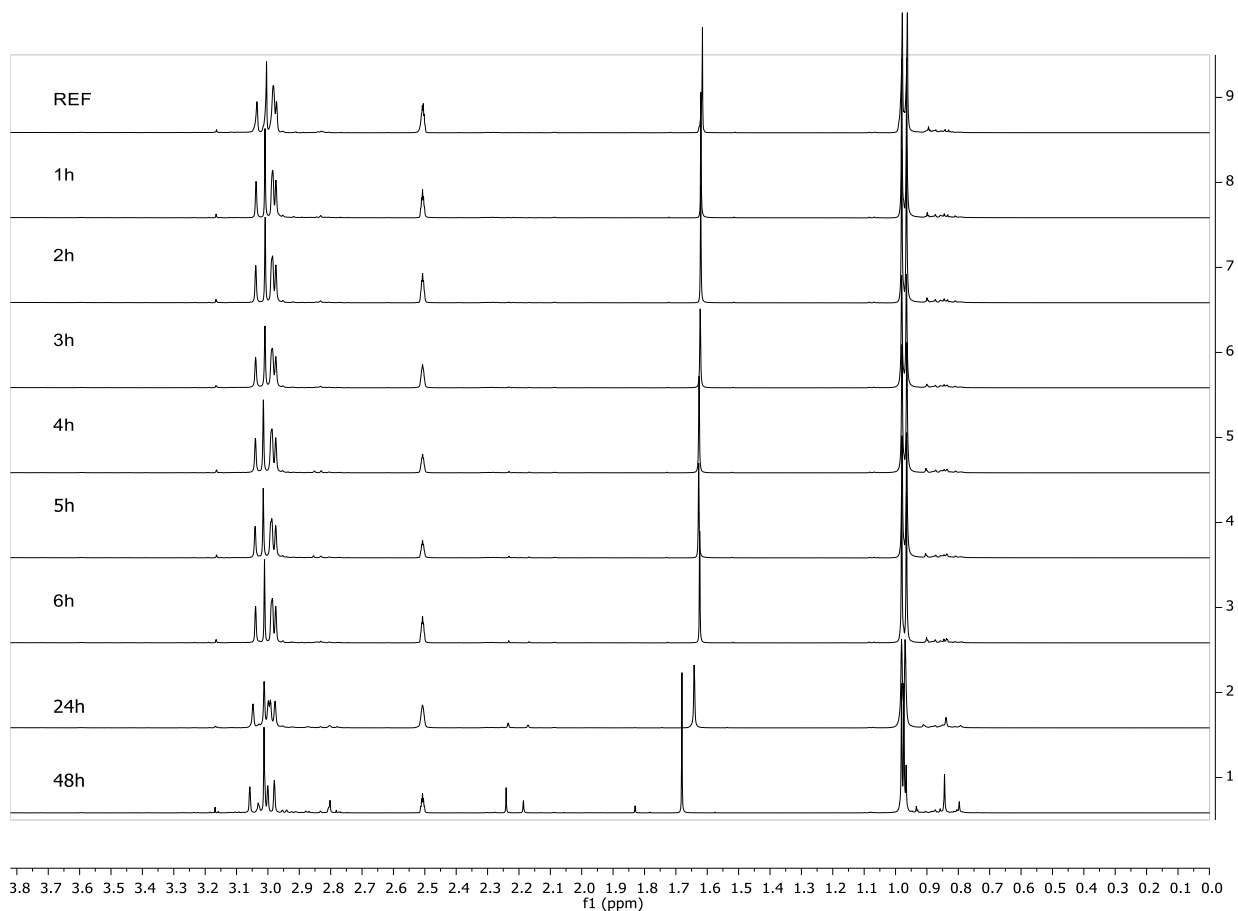

Figure S108 <sup>1</sup>H NMR 1 molar equivalent of [dm39-mTBDH][OAc] and 1 molar equivalent of water.

| Structure | Time | Integral acetate | Integral HP1 | Integral HP2 | % HP |
|-----------|------|------------------|--------------|--------------|------|
|           | REF  | 67253200.00      | 0.00         | 0.00         | 0.0  |
|           | 1h   | 54472900.00      | 0.00         | 0.00         | 0.0  |
|           | 2h   | 63343500.00      | 0.00         | 0.00         | 0.0  |
|           | 3h   | 63211700.00      | 0.00         | 0.00         | 0.0  |
|           | 4h   | 243528000.00     | 0.00         | 0.00         | 0.0  |
|           | 5h   | 60959700.00      | 0.00         | 0.00         | 0.0  |
|           | 6h   | 65456600.00      | 0.00         | 0.00         | 0.0  |
|           | 24h  | 62143800.00      | 0.00         | 0.00         | 0.0  |
|           | 48h  | 95352300.00      | 0.00         | 0.00         | 0.0  |

Table S110 1 molar equivalent of [dm39-mTBDH][OAc] and 5 molar equivalent of water.

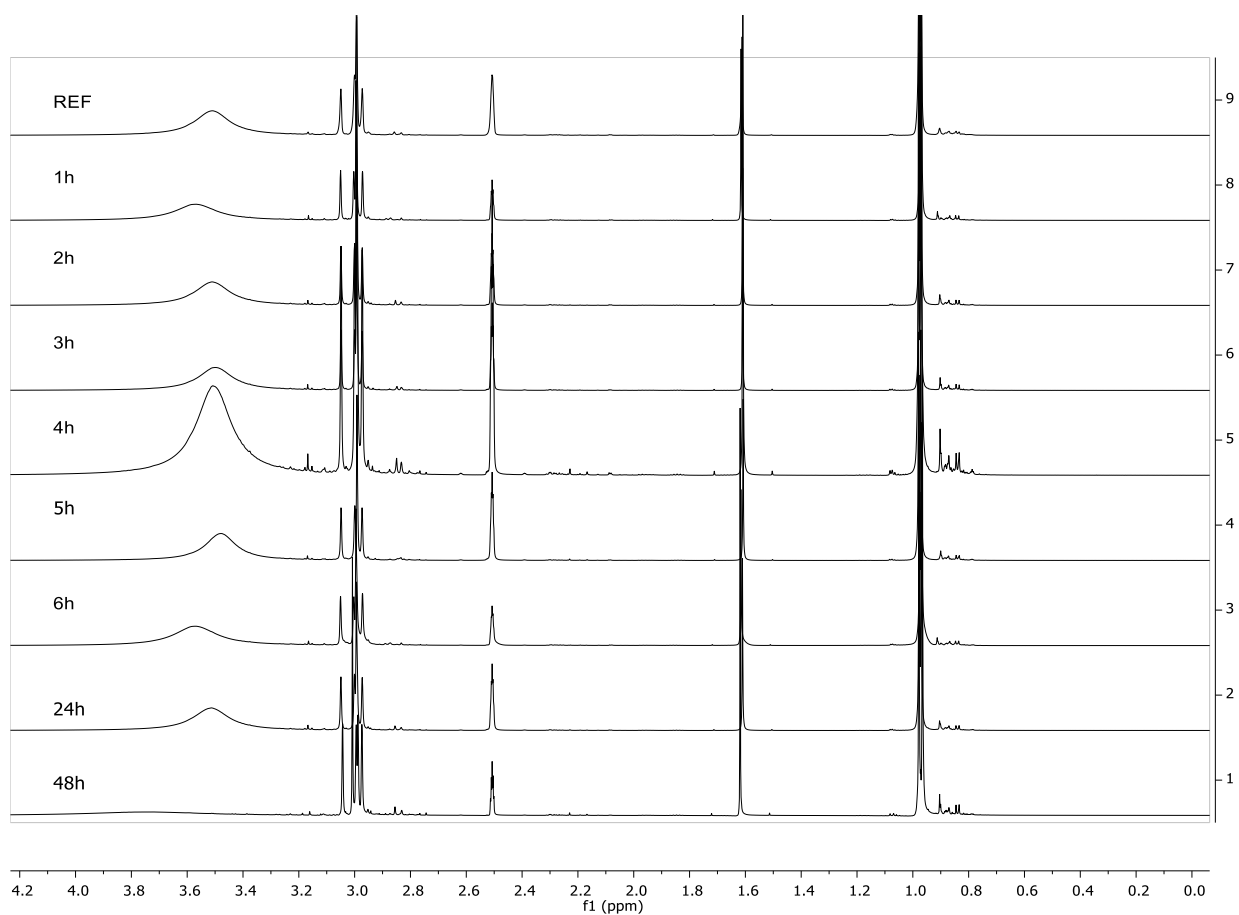

Figure S109  $^1\text{H}$  NMR 1 molar equivalent of  $[\text{dm}39\text{-mTBDH}][\text{OAc}]$  and 5 molar equivalent of water.

| Structure | Time | Integral acetate | Integral HP1 | Integral HP2 | % HP |
|-----------|------|------------------|--------------|--------------|------|
|           | REF  | 39006400.00      | 0.00         | 0.00         | 0.0  |
|           | 1h   | 52842600.00      | 0.00         | 0.00         | 0.0  |
|           | 2h   | 46272400.00      | 0.00         | 0.00         | 0.0  |
|           | 3h   | 51247100.00      | 0.00         | 0.00         | 0.0  |
|           | 4h   | 51325500.00      | 0.00         | 0.00         | 0.0  |
|           | 5h   | 49779500.00      | 0.00         | 0.00         | 0.0  |
|           | 6h   | 52092100.00      | 0.00         | 0.00         | 0.0  |
|           | 24h  | 51698100.00      | 0.00         | 0.00         | 0.0  |
|           | 48h  | 55511600.00      | 0.00         | 0.00         | 0.0  |

Table S111 1 molar equivalent of  $[\text{dm}39\text{-mTBDH}][\text{OAc}]$  and 10 molar equivalent of water.

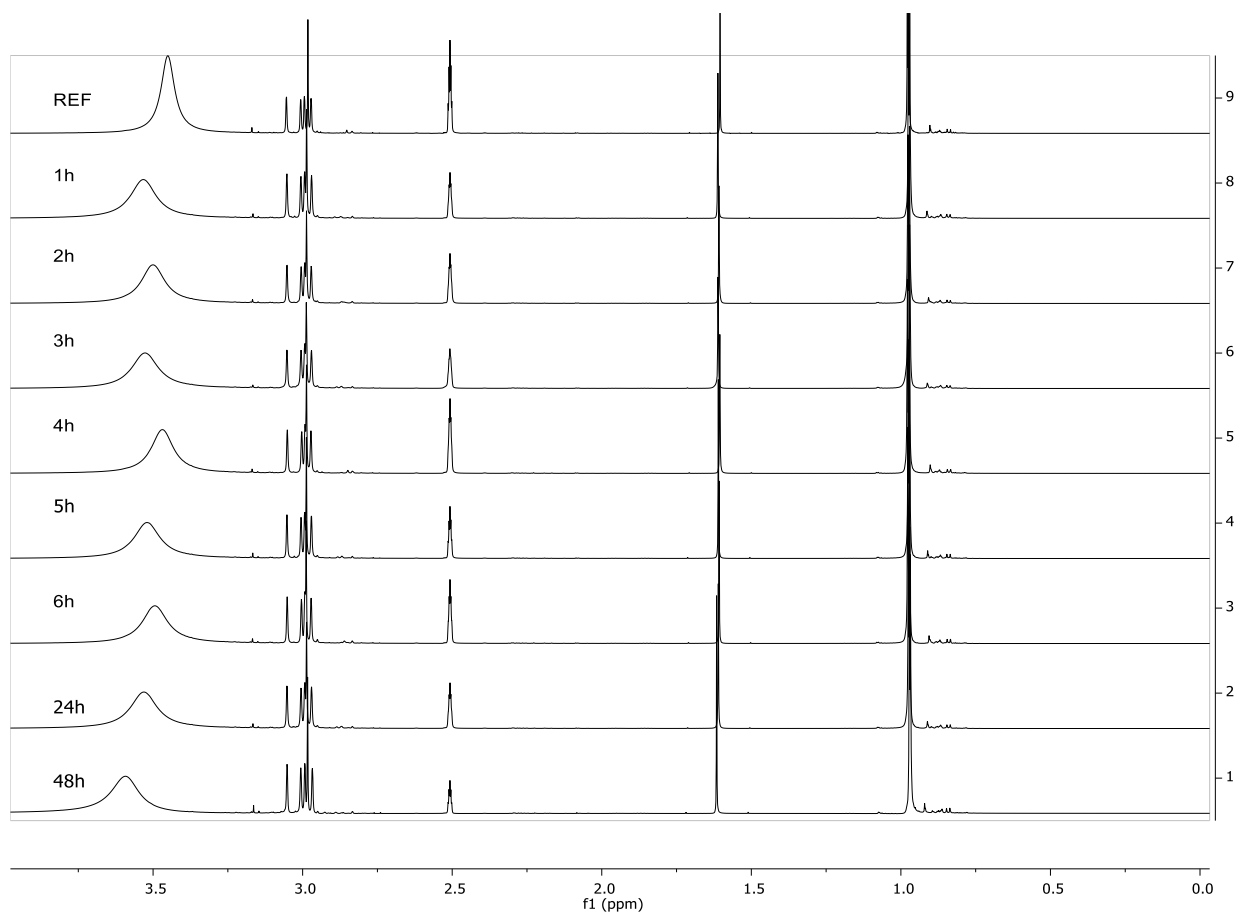

Figure S110  $^1\text{H}$  NMR S111 1 molar equivalent of  $[\text{dm}39\text{-mTBDH}][\text{OAc}]$  and 10 molar equivalent of water.

### 8. dm3-m0-mTBD + water

| Structure | Time | Integral N-Methyl 1 | Integral N-Methyl 2 | Integral N-Methyl total | Integral HP 1 | Integral HP 2 | Integral HP Total | % HP  |
|-----------|------|---------------------|---------------------|-------------------------|---------------|---------------|-------------------|-------|
|           | REF  | 14898500.00         | 13780900.00         | 28679400.00             | 57607.60      | 125259.00     | 182866.60         | 0.63  |
|           | 1h   | 14301200.00         | 12162800.00         | 26464000.00             | 1127190.00    | 2241110.00    | 3368300.00        | 11.29 |
|           | 2h   | 14652900.00         | 11173400.00         | 25826300.00             | 1204360.00    | 3831670.00    | 5036030.00        | 16.32 |
|           | 3h   | 14436500.00         | 10082400.00         | 24518900.00             | 1225680.00    | 4981020.00    | 6206700.00        | 20.20 |
|           | 4h   | 12788900.00         | 8735110.00          | 21524010.00             | 1099400.00    | 5464980.00    | 6564380.00        | 23.37 |
|           | 5h   | 13448300.00         | 7752000.00          | 21200300.00             | 1187640.00    | 6702670.00    | 7890310.00        | 27.12 |
|           | 6h   | 13267000.00         | 7232150.00          | 20499150.00             | 1244510.00    | 7824870.00    | 9069380.00        | 30.67 |
|           | 7h   | 4523300.00          | 2421690.00          | 6944990.00              | 413116.00     | 2936660.00    | 3349776.00        | 32.54 |
|           | 8h   | 24580700.00         | 12446400.00         | 37027100.00             | 2549210.00    | 18013600.00   | 20562810.00       | 35.71 |
|           | 24h  | 13324600.00         | 3388010.00          | 16712610.00             | 1920270.00    | 18301700.00   | 20221970.00       | 54.75 |
|           | 48h  | 36018700.00         | 17622500.00         | 53641200.00             | 6294600.00    | 57854900.00   | 64149500.00       | 54.46 |

Table S112 1 molar equivalent of  $\text{dm}3\text{-m}0\text{-mTBD}$  and 1 molar equivalent of water.

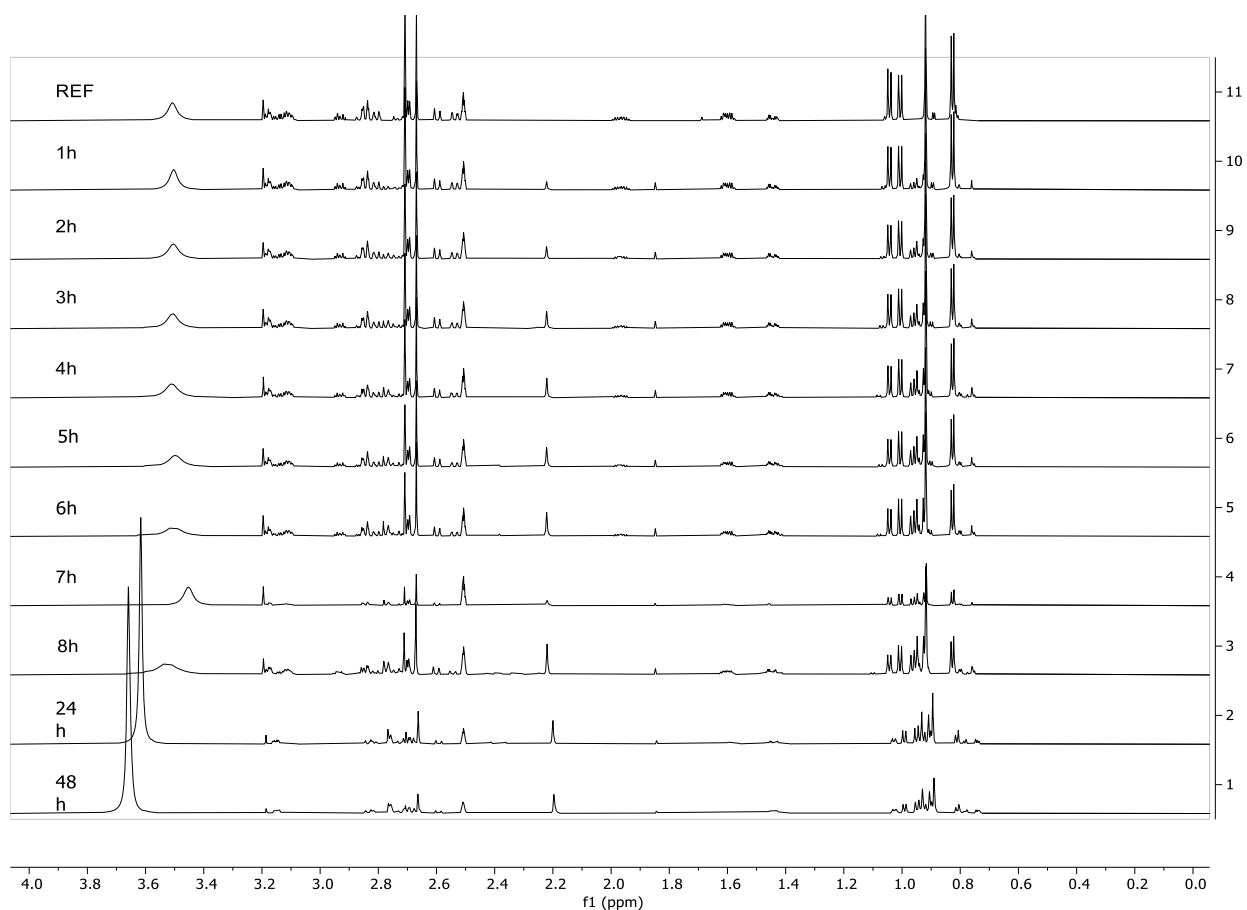

Figure S111 <sup>1</sup>H NMR 1 molar equivalent of dm3-m0-mTBD and 1 molar equivalent of water.

| Structure | Time | Integral N-Methyl 1 | Integral N-Methyl 2 | Integral N Methyl total | Integral HP 1 | Integral HP 2 | Integral HP Total | % HP  |
|-----------|------|---------------------|---------------------|-------------------------|---------------|---------------|-------------------|-------|
|           | REF  | 115342000.00        | 109817000.00        | 225159000.00            | 1127840.00    | 1414690.00    | 2542530.00        | 1.12  |
|           | 1h   | 68230200.00         | 99940400.00         | 168170600.00            | 83118400.00   | 11944600.00   | 95063000.00       | 36.11 |
|           | 2h   | 43778300.00         | 89628500.00         | 133406800.00            | 129796000.00  | 12970200.00   | 142766200.00      | 51.69 |
|           | 3h   | 34723300.00         | 97113400.00         | 131836700.00            | 180157000.00  | 15957600.00   | 196114600.00      | 59.80 |
|           | 4h   | 20220300.00         | 70149800.00         | 90370100.00             | 151507000.00  | 12654500.00   | 164161500.00      | 64.50 |
|           | 5h   | 15923800.00         | 68477300.00         | 84401100.00             | 166067000.00  | 12865600.00   | 178932600.00      | 67.95 |
|           | 6h   | 10831600.00         | 56583900.00         | 67415500.00             | 156140000.00  | 11638900.00   | 167778900.00      | 71.34 |
|           | 7h   | 8185200.00          | 46098800.00         | 54284000.00             | 148456000.00  | 10892800.00   | 159348800.00      | 74.59 |
|           | 8h   | 31279400.00         | 4828000.00          | 36107400.00             | 178851000.00  | 13111200.00   | 191962200.00      | 84.17 |
|           | 24h  | 9428020.00          | 18021100.00         | 27449120.00             | 154467000.00  | 13605400.00   | 168072400.00      | 85.96 |
|           | 48h  | 1776160.00          | 889806.00           | 2665966.00              | 91933500.00   | 6760360.00    | 98693860.00       | 97.37 |

Table S113 1 molar equivalent of dm3-m0-mTBD and 5 molar equivalents of water.



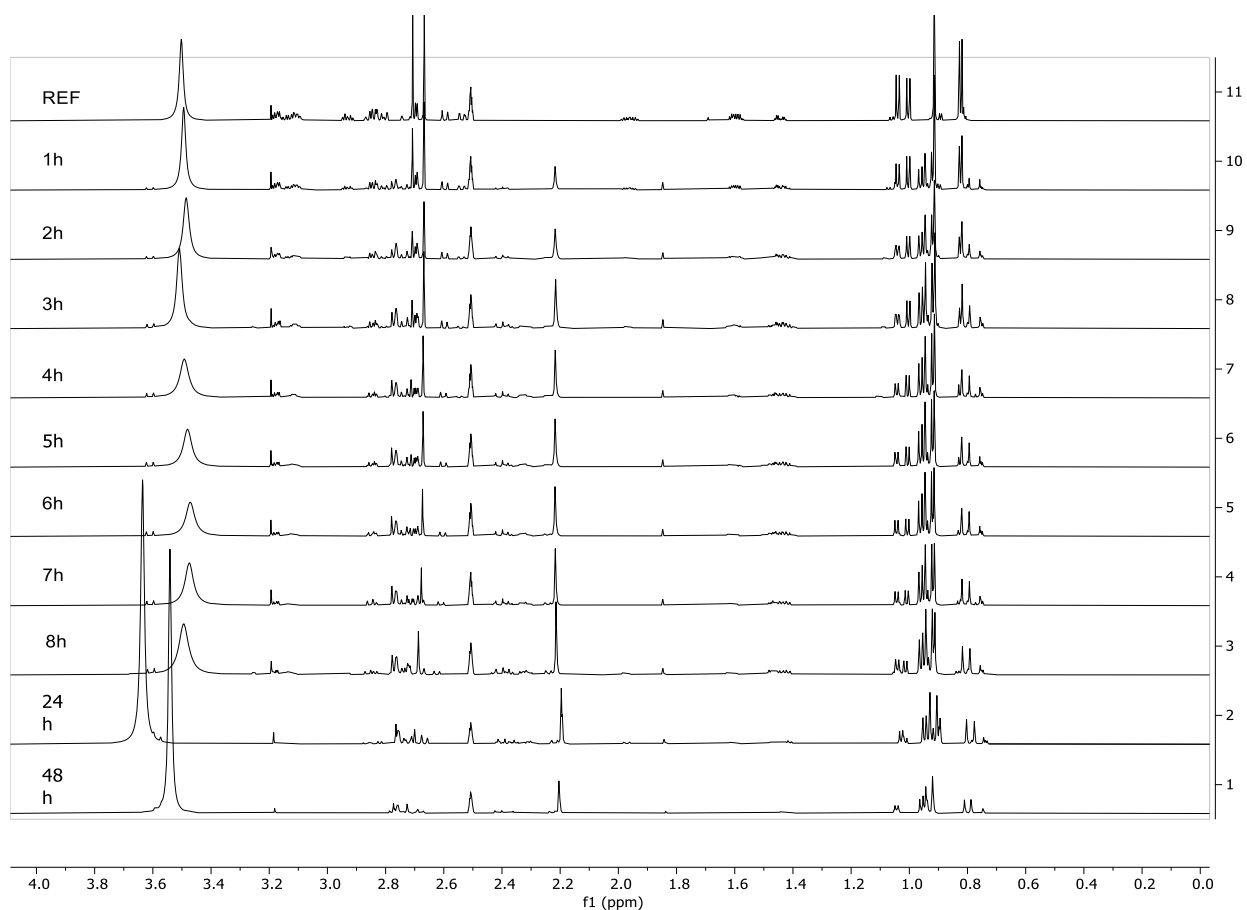

Figure S112  $^1\text{H}$  NMR 1 molar equivalent of dm3-m0-mTBD and 5 molar equivalents of water.

| Structure | Time | Integral N-Methyl 1 | Integral N-Methyl 2 | Integral N Methyl total | Integral HP | Integral HP total | % HP   |
|-----------|------|---------------------|---------------------|-------------------------|-------------|-------------------|--------|
|           | REF  | 30244000.00         | 30662400.00         | 60906400.00             | 225605.00   | 225605.00         | 0.37   |
|           | 1h   | 8127670.00          | 16358000.00         | 24485670.00             | 24995500.00 | 24995500.00       | 50.52  |
|           | 2h   | 1797800.00          | 2245380.00          | 4043180.00              | 33878500.00 | 33878500.00       | 89.34  |
|           | 3h   | 19295.10            | 273456.00           | 292751.10               | 36654300.00 | 36654300.00       | 99.21  |
|           | 4h   | 34513.50            | 334177.00           | 368690.50               | 46299200.00 | 46299200.00       | 99.21  |
|           | 5h   | 59373.10            | 225933.00           | 285306.10               | 39845600.00 | 39845600.00       | 99.29  |
|           | 6h   | 20292.70            | 145397.00           | 165689.70               | 42158300.00 | 42158300.00       | 99.61  |
|           | 7h   | 8426.35             | 21129.40            | 29555.75                | 17966200.00 | 17966200.00       | 99.84  |
|           | 24h  | 4270.05             | 4405.02             | 8675.07                 | 13918300.00 | 13918300.00       | 99.94  |
|           | 48h  | 0.00                | 0.00                | 0.00                    | 55119800.00 | 55119800.00       | 100.00 |

Table S114 1 molar equivalent of dm3-m0-mTBD and 10 molar equivalent of water.

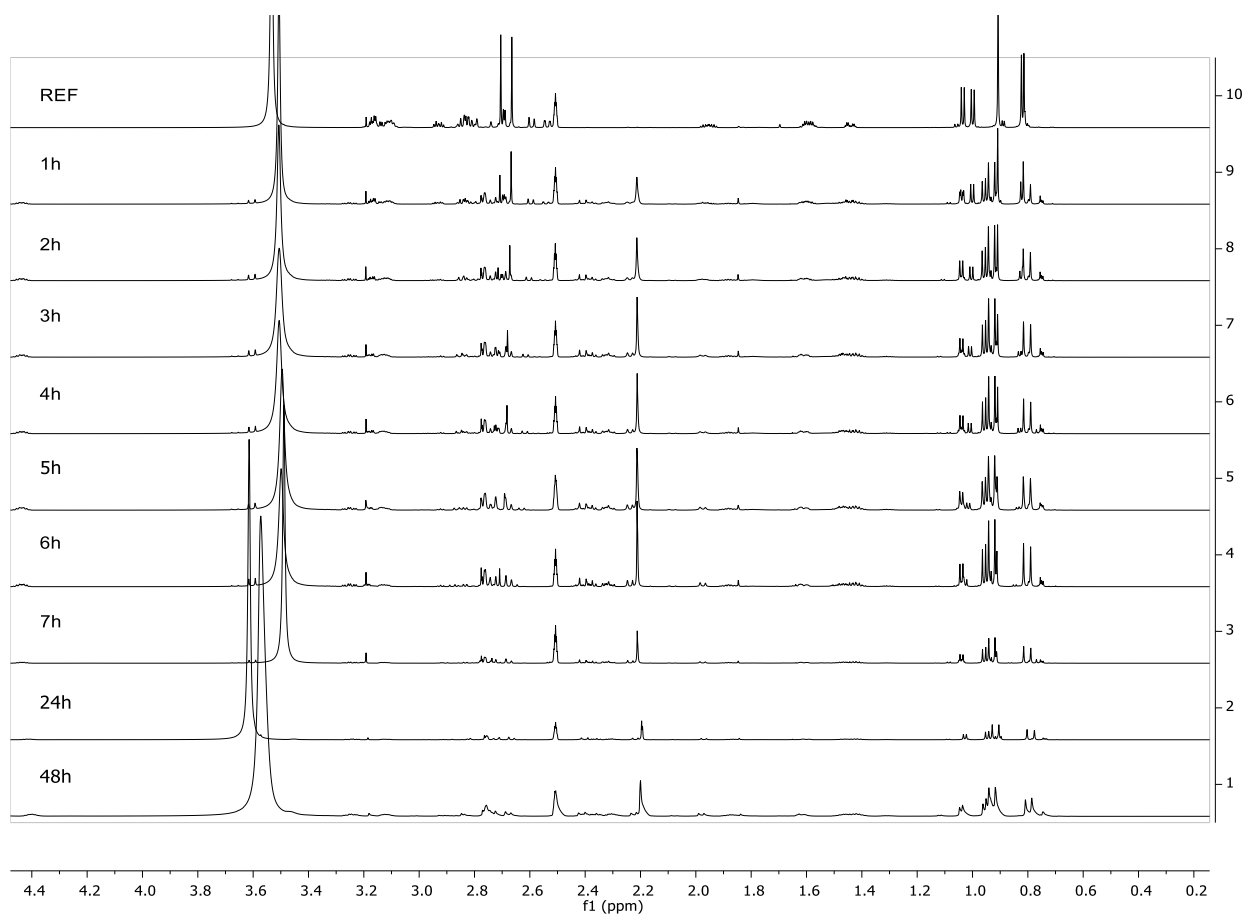

Figure S113 <sup>1</sup>H NMR 1 molar equivalent of dm3-m0-mTBDH and 10 molar equivalent of water.

9. [dm3-m0-mTBDH][OAc] + water

| Structure | Time        | Integral N-Methyl 1 | Integral N-Methyl 2 | Integral N Methyl total | Integral HP 1 | Integral HP 2 | Integral HP Total | % HP |
|-----------|-------------|---------------------|---------------------|-------------------------|---------------|---------------|-------------------|------|
|           | REF         | 26980100.00         | 0.00                | 26980100.00             | 0.00          | 0.00          | 0.00              | 0.00 |
|           | 1h          | 22540200.00         | 0.00                | 22540200.00             | 0.00          | 0.00          | 0.00              | 0.00 |
|           | 2h          | 23601200.00         | 0.00                | 23601200.00             | 0.00          | 0.00          | 0.00              | 0.00 |
|           | 3h          | 23832900.00         | 0.00                | 23832900.00             | 0.00          | 0.00          | 0.00              | 0.00 |
|           | 4h          | 23779200.00         | 0.00                | 23779200.00             | 0.00          | 0.00          | 0.00              | 0.00 |
|           | 5h          | 27657800.00         | 0.00                | 27657800.00             | 0.00          | 0.00          | 0.00              | 0.00 |
|           | 6h          | 24582200.00         | 0.00                | 24582200.00             | 0.00          | 0.00          | 0.00              | 0.00 |
|           | 7h          | 8800900.00          | 0.00                | 8800900.00              | 0.00          | 0.00          | 0.00              | 0.00 |
|           | 8h          | 51566600.00         | 0.00                | 51566600.00             | 0.00          | 0.00          | 0.00              | 0.00 |
|           | 24h         | 34067200.00         | 0.00                | 34067200.00             | 0.00          | 0.00          | 0.00              | 0.00 |
| 48h       | 32571300.00 | 0.00                | 32571300.00         | 0.00                    | 0.00          | 0.00          | 0.00              |      |

Table S115 1 molar equivalent of [dm3-m0-mTBDH][OAc] and 1 molar equivalent of water.

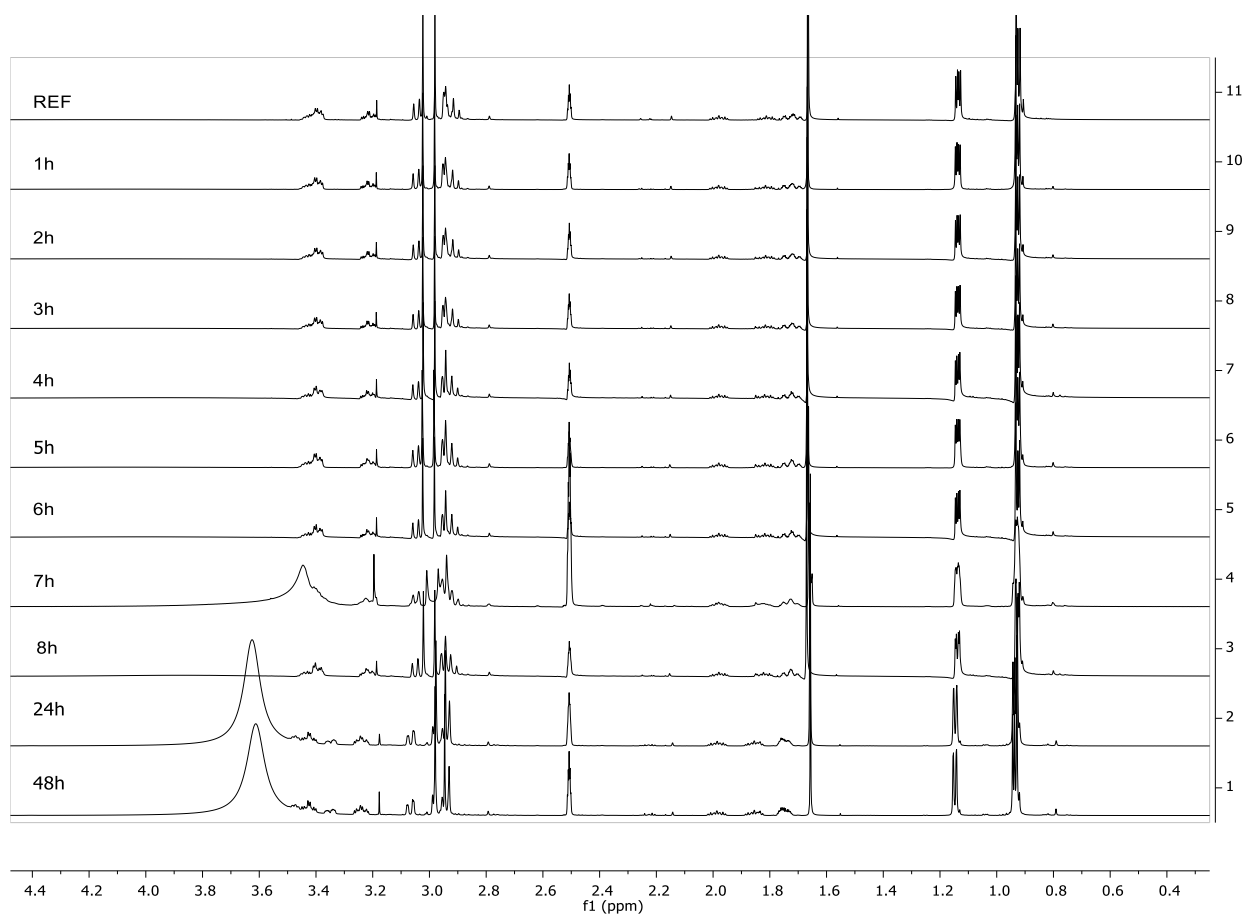

Figure S114  $^1\text{H}$  NMR 1 molar equivalent of  $[\text{dm}3\text{-m}0\text{-mTBDH}][\text{OAc}]$  and 1 molar equivalent of water.

| Structure | Time | Integral N-Methyl 1 | Integral N-Methyl 2 | Integral N Methyl total | Integral HP 1 | Integral HP 2 | Integral HP Total | % HP |
|-----------|------|---------------------|---------------------|-------------------------|---------------|---------------|-------------------|------|
|           | REF  | 19652000.00         | 0.00                | 19652000.00             | 0.00          | 0.00          | 0.00              | 0.00 |
|           | 1h   | 19547100.00         | 0.00                | 19547100.00             | 0.00          | 0.00          | 0.00              | 0.00 |
|           | 2h   | 19781600.00         | 0.00                | 19781600.00             | 0.00          | 0.00          | 0.00              | 0.00 |
|           | 3h   | 27109000.00         | 0.00                | 27109000.00             | 0.00          | 0.00          | 0.00              | 0.00 |
|           | 4h   | 20017300.00         | 0.00                | 20017300.00             | 0.00          | 0.00          | 0.00              | 0.00 |
|           | 5h   | 20309100.00         | 0.00                | 20309100.00             | 0.00          | 0.00          | 0.00              | 0.00 |
|           | 6h   | 18986300.00         | 0.00                | 18986300.00             | 0.00          | 0.00          | 0.00              | 0.00 |
|           | 7h   | 17090300.00         | 0.00                | 17090300.00             | 0.00          | 0.00          | 0.00              | 0.00 |
|           | 8h   | 43550900.00         | 0.00                | 43550900.00             | 0.00          | 0.00          | 0.00              | 0.00 |
|           | 48h  | 29184100.00         | 0.00                | 29184100.00             | 0.00          | 0.00          | 0.00              | 0.00 |

Table S116 1 molar equivalent of  $[\text{dm}3\text{-m}0\text{-mTBDH}][\text{OAc}]$  and 5 molar equivalent of water.

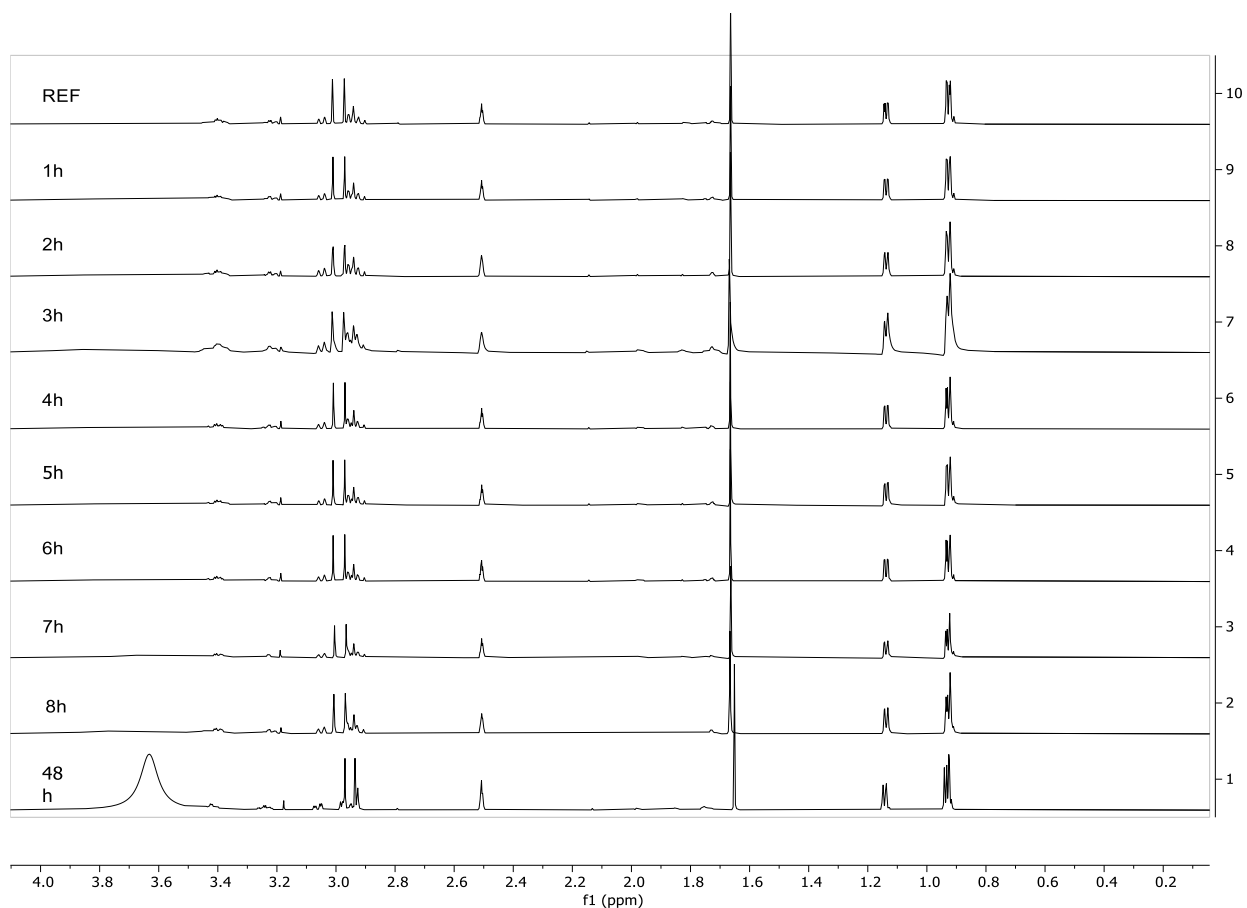

Figure S115 <sup>1</sup>H NMR 1 molar equivalent of [dm3-m0-mTBDH][OAc] and 5 molar equivalent of water.

| Structure | Time | integral N-Methyl 1 | integral N-Methyl 2 | integral N Methyl total | integral HP 1 | integral HP 2 | integral HP Total | % HP |
|-----------|------|---------------------|---------------------|-------------------------|---------------|---------------|-------------------|------|
|           | REF  | 16407500.00         | 0.00                | 16407500.00             | 0.00          | 0.00          | 0.00              | 0.00 |
|           | 1h   | 15992500.00         | 0.00                | 15992500.00             | 0.00          | 0.00          | 0.00              | 0.00 |
|           | 2h   | 16274100.00         | 0.00                | 16274100.00             | 0.00          | 0.00          | 0.00              | 0.00 |
|           | 3h   | 18253000.00         | 0.00                | 18253000.00             | 0.00          | 0.00          | 0.00              | 0.00 |
|           | 4h   | 16809100.00         | 0.00                | 16809100.00             | 0.00          | 0.00          | 0.00              | 0.00 |
|           | 5h   | 17126400.00         | 0.00                | 17126400.00             | 0.00          | 0.00          | 0.00              | 0.00 |
|           | 6h   | 17291200.00         | 0.00                | 17291200.00             | 0.00          | 0.00          | 0.00              | 0.00 |
|           | 7h   | 11249700.00         | 0.00                | 11249700.00             | 0.00          | 0.00          | 0.00              | 0.00 |
|           | 8h   | 34548300.00         | 0.00                | 34548300.00             | 0.00          | 0.00          | 0.00              | 0.00 |
|           | 48h  | 24899100.00         | 0.00                | 24899100.00             | 0.00          | 0.00          | 0.00              | 0.00 |

Table S117 1 molar equivalent of [dm3-m0-mTBDH][OAc] and 10 molar equivalent of water.

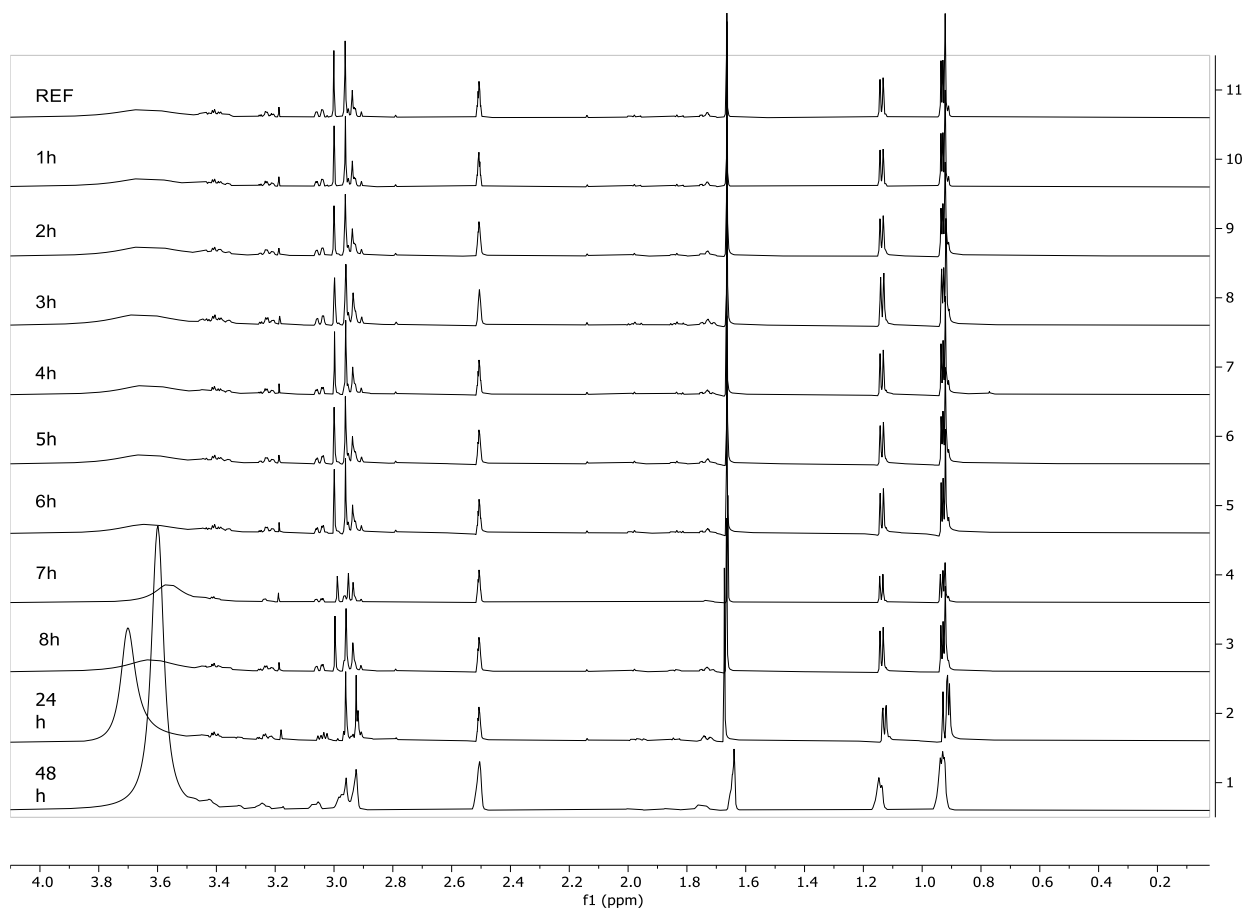

Figure S116  $^1\text{H}$  NMR 1 molar equivalent of  $[\text{dm}3\text{-m}0\text{-mTBDH}][\text{OAc}]$  and 10 molar equivalent of water.

10. dm3-mTBD + water

| Structure | HT_28 | Integral N-Methyl 1 | Integral N-Methyl 2 | Integral N-Methyl total | Integral HP 1 | Integral HP 2 | Integral HP Total | % HP  |
|-----------|-------|---------------------|---------------------|-------------------------|---------------|---------------|-------------------|-------|
|           | REF   | 102945000.00        | 125448000.00        | 228393000.00            | 1035700.00    | 299898.00     | 1335598.00        | 0.00  |
|           | 1h    | 107742000.00        | 131671000.00        | 239413000.00            | 4228230.00    | 3176190.00    | 7404420.00        | 3.00  |
|           | 2h    | 105342000.00        | 128846000.00        | 234188000.00            | 8581860.00    | 7039660.00    | 15621520.00       | 6.25  |
|           | 3h    | 105944000.00        | 130043000.00        | 235987000.00            | 12548500.00   | 10608800.00   | 23157300.00       | 8.94  |
|           | 4h    | 103859000.00        | 127291000.00        | 231150000.00            | 14967200.00   | 12776200.00   | 27743400.00       | 10.72 |
|           | 5h    | 107420000.00        | 132032000.00        | 239452000.00            | 17972600.00   | 15376200.00   | 33348800.00       | 12.22 |
|           | 6h    | 99294000.00         | 121986000.00        | 221280000.00            | 19131500.00   | 16488900.00   | 35620400.00       | 13.87 |
|           | 7h    | 92150700.00         | 115004000.00        | 207154700.00            | 19763100.00   | 17496400.00   | 37259500.00       | 15.24 |
|           | 8h    | 88418700.00         | 108903000.00        | 197321700.00            | 19081000.00   | 17403900.00   | 36484900.00       | 15.60 |
|           | 24h   | 21975400.00         | 26751900.00         | 48727300.00             | 8765730.00    | 6195100.00    | 14960830.00       | 23.49 |
|           | 48h   | 20222500.00         | 25135200.00         | 45357700.00             | 8982610.00    | 7477050.00    | 16459660.00       | 26.63 |

Table S118 1 molar equivalent of dm3-mTBD and 0.2 molar equivalent of water.

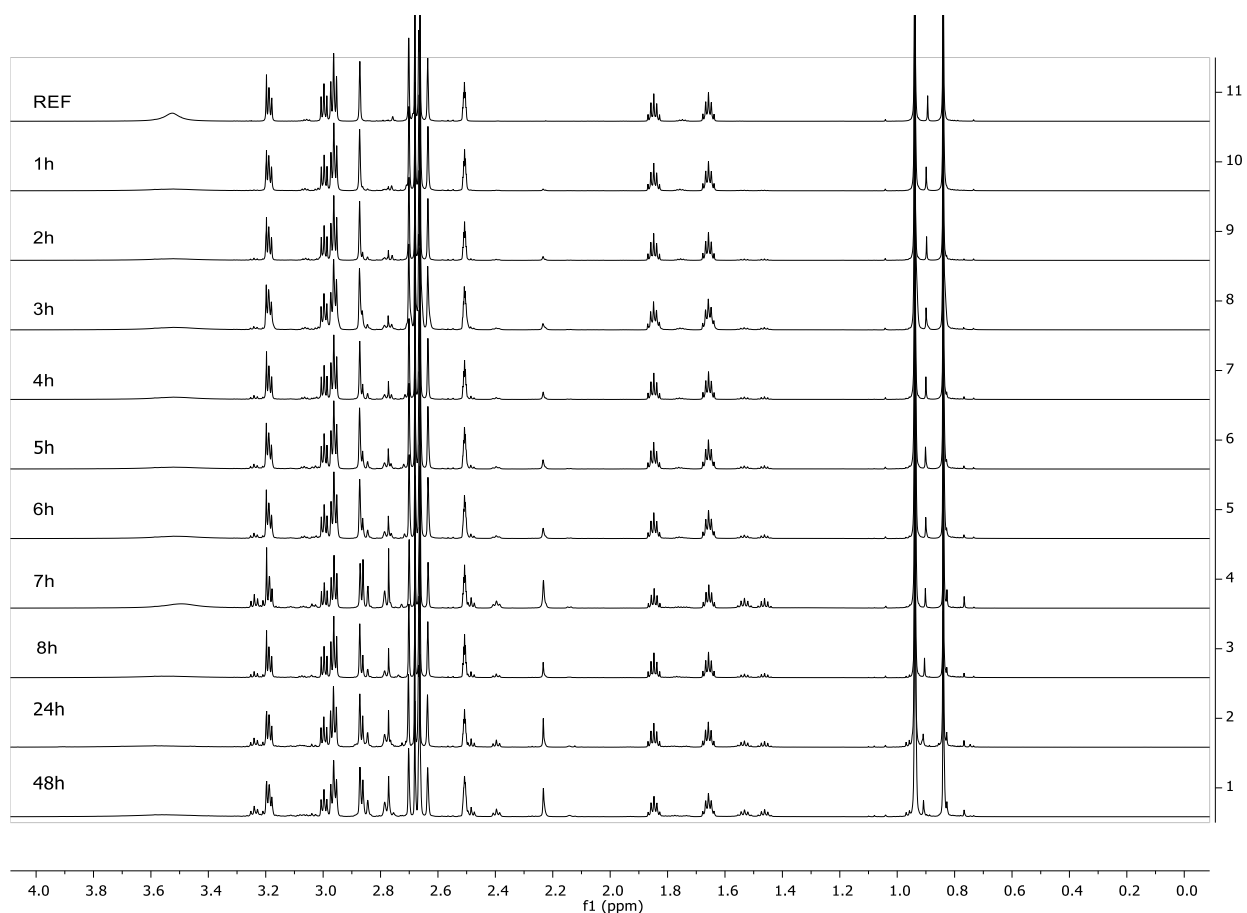

Figure S117  $^1\text{H}$  NMR molar equivalent of dm3-mTBD and 0.2 molar equivalent of water.

| Structure | Time | Integral N-Methyl 1 | Integral N-Methyl 2 | Integral N Methyl total | Integral HP 1 | Integral HP 2 | Integral HP Total | % HP  |
|-----------|------|---------------------|---------------------|-------------------------|---------------|---------------|-------------------|-------|
|           | REF  | 102672000.00        | 126118000.00        | 228790000.00            | 960233.00     | 249511.00     | 1209744.00        | 0.00  |
|           | 1h   | 105252000.00        | 132918000.00        | 238170000.00            | 13286300.00   | 10001600.00   | 23287900.00       | 8.91  |
|           | 2h   | 88629900.00         | 114898000.00        | 203527900.00            | 23973300.00   | 17891900.00   | 41865200.00       | 17.06 |
|           | 3h   | 74875700.00         | 98428200.00         | 173303900.00            | 30208900.00   | 22275900.00   | 52484800.00       | 23.25 |
|           | 4h   | 75909500.00         | 102195000.00        | 178104500.00            | 37009600.00   | 27843600.00   | 64853200.00       | 26.69 |
|           | 5h   | 79714100.00         | 108788000.00        | 188502100.00            | 44674300.00   | 34080600.00   | 78754900.00       | 29.47 |
|           | 6h   | 74578600.00         | 103400000.00        | 177978600.00            | 49011500.00   | 37444000.00   | 86455500.00       | 32.69 |
|           | 7h   | 72288300.00         | 97234500.00         | 169522800.00            | 50231600.00   | 37366200.00   | 87597800.00       | 34.07 |
|           | 8h   | 65936500.00         | 93382400.00         | 159318900.00            | 48781000.00   | 39823000.00   | 88604000.00       | 35.74 |
|           | 24h  | 12197500.00         | 18878100.00         | 31075600.00             | 17705100.00   | 13682600.00   | 31387700.00       | 50.25 |
|           | 48h  | 10893800.00         | 17993900.00         | 28887700.00             | 19453400.00   | 15770800.00   | 35224200.00       | 54.94 |

Table S119 1 molar equivalent of dm3-mTBD and 0.5 molar equivalent of water.

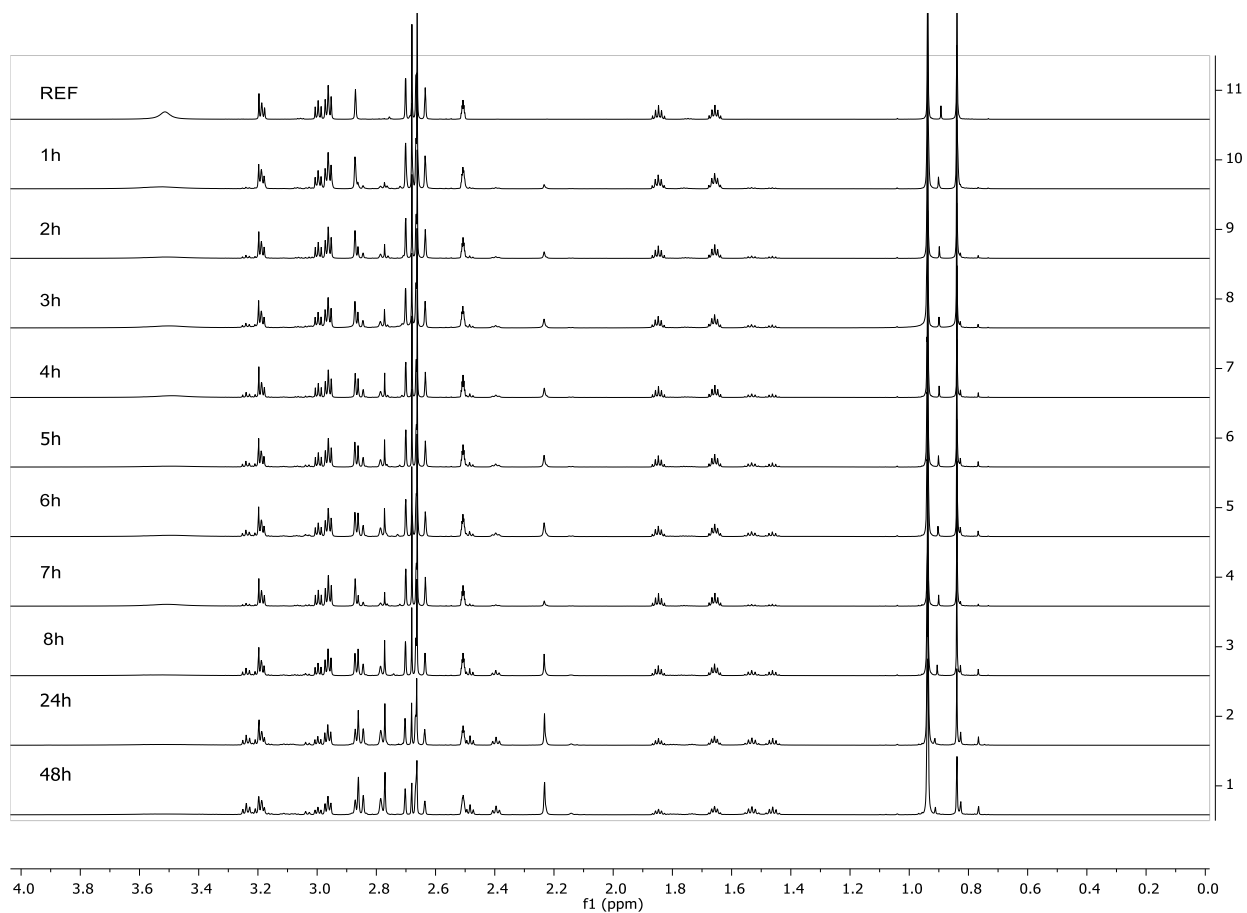

Figure S118  $^1\text{H}$  NMR 1 molar equivalent of dm3-mTBD and 0.5 molar equivalent of water.

| Structure | Time | Integral N-Methyl 1 | Integral N-Methyl 2 | Integral N Methyl total | Integral HP 1 | Integral HP 2 | Integral HP Total | % HP  |
|-----------|------|---------------------|---------------------|-------------------------|---------------|---------------|-------------------|-------|
|           | REF  | 100924000.00        | 125640000.00        | 226564000.00            | 920595.00     | 261539.00     | 1182134.00        | 0.00  |
|           | 1h   | 87629300.00         | 117399000.00        | 205028300.00            | 22599100.00   | 15500500.00   | 38099600.00       | 15.67 |
|           | 2h   | 72385800.00         | 105215000.00        | 177600800.00            | 40412400.00   | 28620600.00   | 69033000.00       | 27.99 |
|           | 3h   | 58567700.00         | 89212300.00         | 147780000.00            | 50302700.00   | 35094300.00   | 85397000.00       | 36.62 |
|           | 4h   | 53031200.00         | 84351700.00         | 137382900.00            | 59296700.00   | 41033000.00   | 100329700.00      | 42.21 |
|           | 5h   | 49626300.00         | 80737800.00         | 130364100.00            | 65147800.00   | 45288300.00   | 110436100.00      | 45.86 |
|           | 6h   | 45653100.00         | 77802100.00         | 123455200.00            | 72242800.00   | 51284900.00   | 123527700.00      | 50.01 |
|           | 7h   | 37448500.00         | 65500600.00         | 102949100.00            | 66725500.00   | 47136600.00   | 113862100.00      | 52.52 |
|           | 8h   | 41357100.00         | 74069300.00         | 115426400.00            | 75511300.00   | 58405400.00   | 133916700.00      | 53.71 |
|           | 24h  | 8105000.00          | 16145500.00         | 24250500.00             | 22501200.00   | 17351700.00   | 39852900.00       | 62.17 |
|           | 48h  | 7573510.00          | 16137800.00         | 23711310.00             | 23179500.00   | 19095900.00   | 42275400.00       | 64.07 |

Table S120 1 molar equivalent of dm3-mTBD and 1 molar equivalent of water.

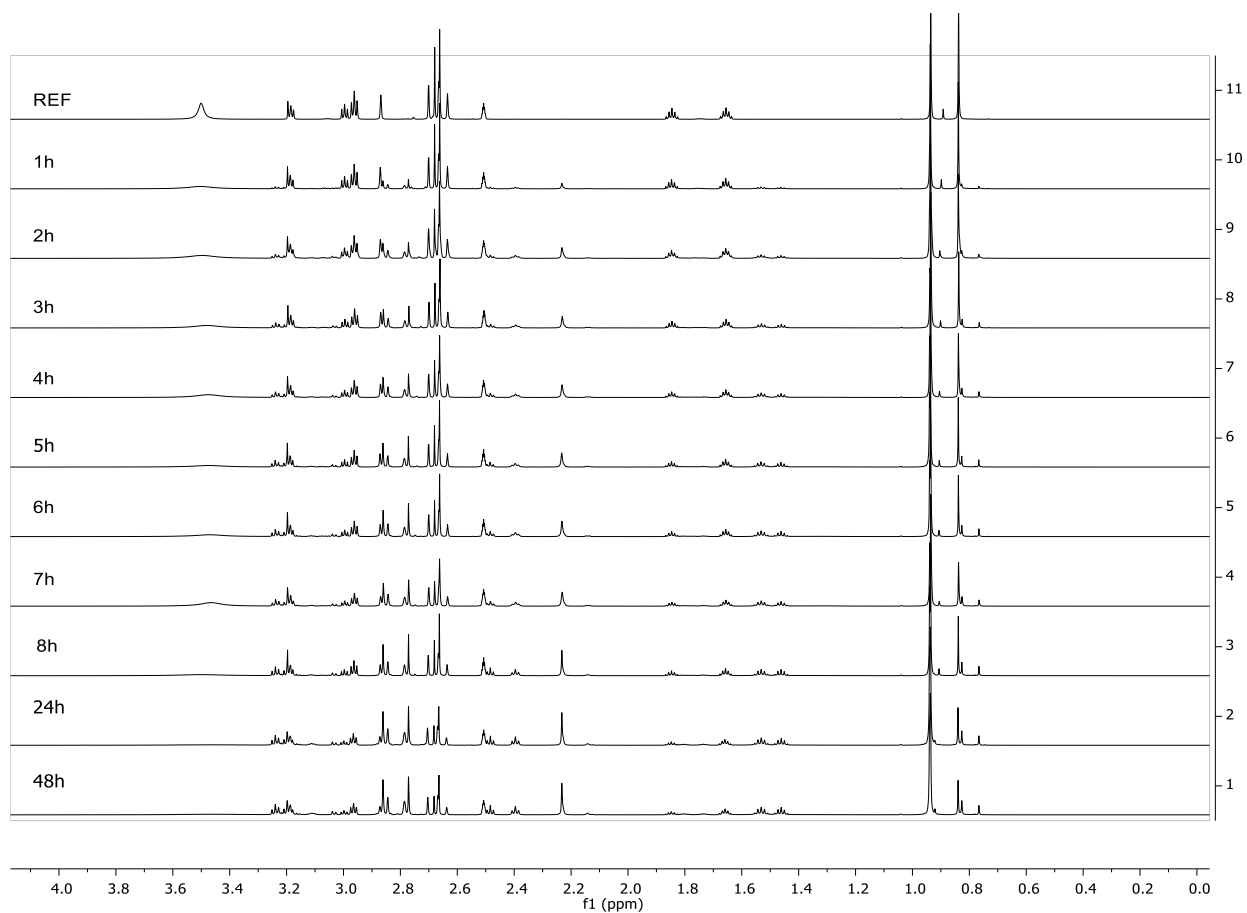

Figure S119  $^1\text{H}$  NMR 1 molar equivalent of dm3-mTBD and 1 molar equivalent of water.

| Structure | Time | Integral N-Methyl 1 | Integral N-Methyl 2 | Integral N-Methyl total | Integral HP 1 | Integral HP 2 | Integral HP Total | % HP  |
|-----------|------|---------------------|---------------------|-------------------------|---------------|---------------|-------------------|-------|
|           | REF  | 72135100.00         | 88168000.00         | 160303100.00            | 666998.00     | 261539.00     | 928537.00         | 0.00  |
|           | 1h   | 26906400.00         | 30382500.00         | 57288900.00             | 40977700.00   | 15500500.00   | 56478200.00       | 49.64 |
|           | 2h   | 17817700.00         | 21382100.00         | 39199800.00             | 49732200.00   | 28620600.00   | 78352800.00       | 66.65 |
|           | 3h   | 12880500.00         | 18845900.00         | 31726400.00             | 51974400.00   | 35094300.00   | 87068700.00       | 73.29 |
|           | 4h   | 9877410.00          | 17749500.00         | 27626910.00             | 53182300.00   | 41033000.00   | 94215300.00       | 77.33 |
|           | 5h   | 9549180.00          | 14391400.00         | 23940580.00             | 49934900.00   | 45288300.00   | 95223200.00       | 79.91 |
|           | 6h   | 10630100.00         | 10525800.00         | 21155900.00             | 53055600.00   | 51284900.00   | 104340500.00      | 83.14 |
|           | 7h   | 10991200.00         | 7438950.00          | 18430150.00             | 51768500.00   | 47136600.00   | 98905100.00       | 84.29 |
|           | 8h   | 9276130.00          | 5362660.00          | 14638790.00             | 42624900.00   | 58405400.00   | 101030300.00      | 87.34 |
|           | 24h  | 2483980.00          | 2288210.00          | 4772190.00              | 18172200.00   | 17351700.00   | 35523900.00       | 88.16 |
|           | 48h  | 1875060.00          | 1582470.00          | 3457530.00              | 16797900.00   | 19095900.00   | 35893800.00       | 91.21 |

Table S121 1 molar equivalent of dm3-mTBD and 5 molar equivalents of water.



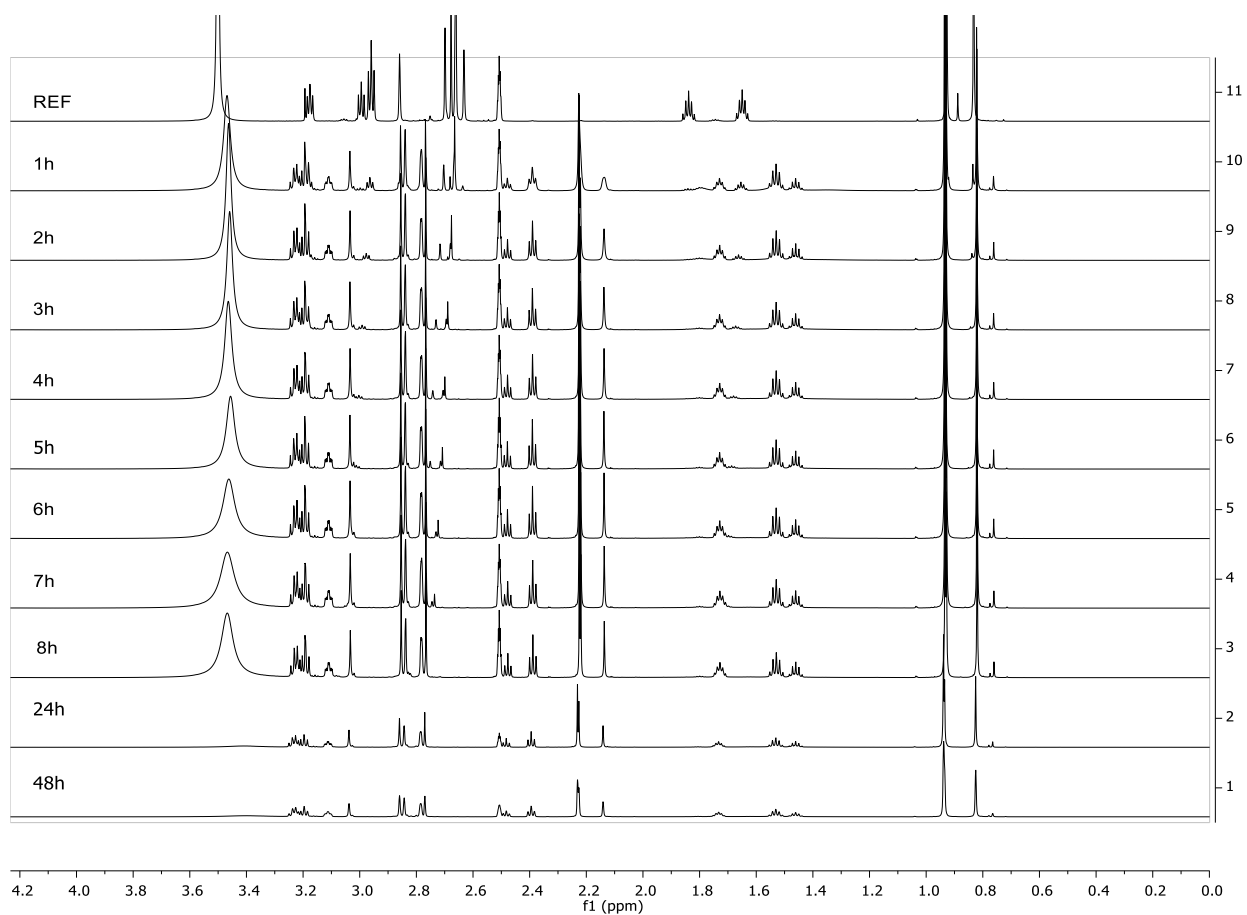

Figure S120  $^1\text{H}$  NMR 1 molar equivalent of dm3-mTBD and 5 molar equivalents of water.

| Structure | Time | Integral N-Methyl 1 | Integral N-Methyl 2 | Integral N Methyl total | Integral HP 1 | Integral HP 2 | Integral HP Total | % HP  |
|-----------|------|---------------------|---------------------|-------------------------|---------------|---------------|-------------------|-------|
|           | REF  | 55026600.00         | 67486300.00         | 122512900.00            | 2387960.00    | 666901.00     | 3054861.00        | 0.00  |
|           | 1h   | 15162100.00         | 12259300.00         | 27421400.00             | 64246300.00   | 30049600.00   | 94295900.00       | 77.47 |
|           | 2h   | 8812810.00          | 6359280.00          | 15172090.00             | 58528900.00   | 27380800.00   | 85909700.00       | 84.99 |
|           | 3h   | 7609180.00          | 4844670.00          | 12453850.00             | 61692400.00   | 28804100.00   | 90496500.00       | 87.90 |
|           | 4h   | 6100070.00          | 2808780.00          | 8908850.00              | 59689500.00   | 27884000.00   | 87573500.00       | 90.77 |
|           | 5h   | 6292480.00          | 1735780.00          | 8028260.00              | 60614300.00   | 27362600.00   | 87976900.00       | 91.64 |
|           | 6h   | 5573750.00          | 1739100.00          | 7312850.00              | 61177100.00   | 28569900.00   | 89747000.00       | 92.47 |
|           | 7h   | 4903500.00          | 1922700.00          | 6826200.00              | 66342300.00   | 31035700.00   | 97378000.00       | 93.45 |
|           | 8h   | 3303460.00          | 1140690.00          | 4444150.00              | 60518300.00   | 27695500.00   | 88213800.00       | 95.20 |
|           | 24h  | 954567.00           | 286748.00           | 1241315.00              | 19334200.00   | 8518080.00    | 27852280.00       | 95.73 |
|           | 48h  | 892530.00           | 274600.00           | 1167130.00              | 20040900.00   | 8799080.00    | 28839980.00       | 96.11 |

Table S122 1 molar equivalent of dm3-mTBD and 10 molar equivalents of water.

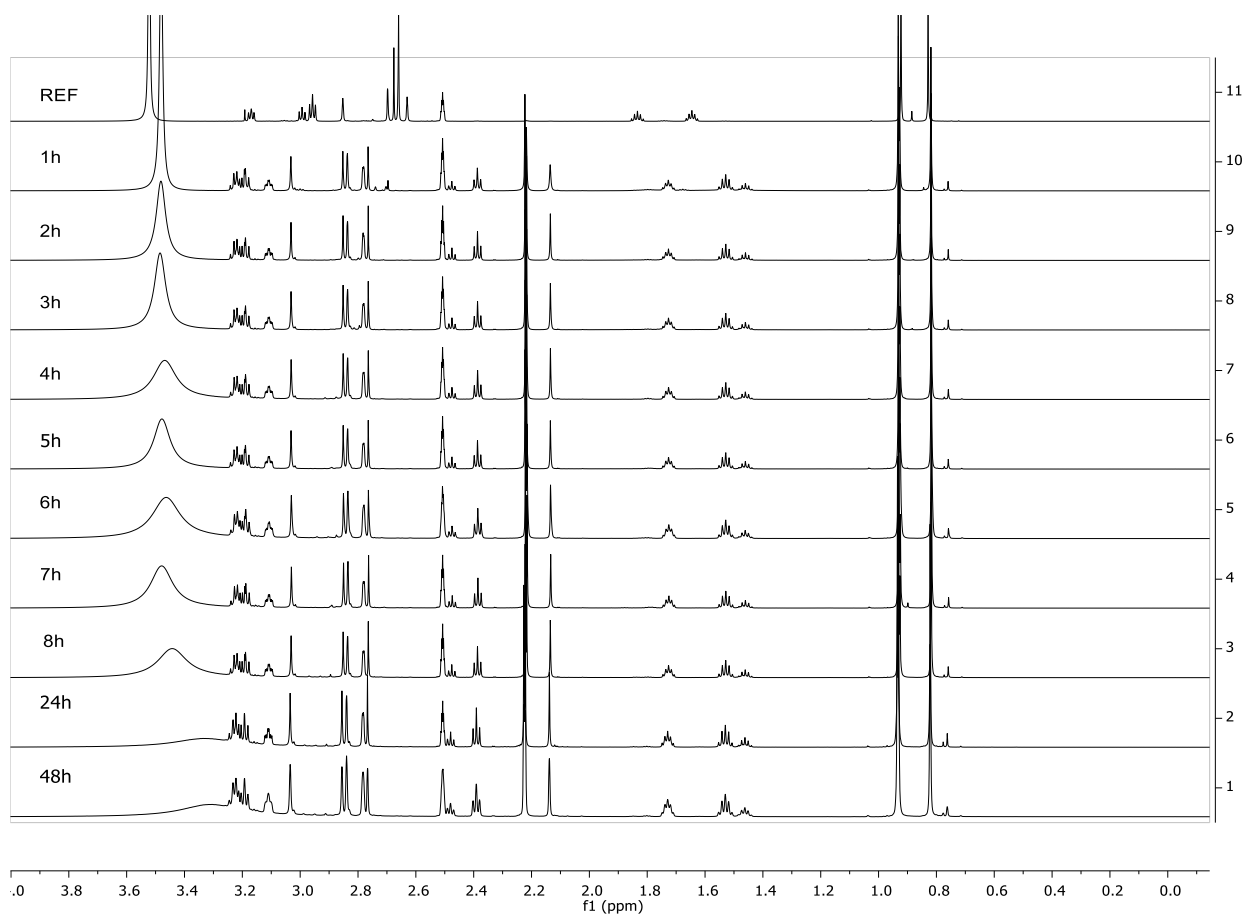

Figure S121  $^1\text{H}$  NMR 1 molar equivalent of dm3-mTBDH and 10 molar equivalents of water.

11.  $[\text{dm3-mTBDH}][\text{OAc}] + \text{water}$

| Structure | Time | integral N-Methyls | integral HP | % HP  |
|-----------|------|--------------------|-------------|-------|
|           | REF  | 83023600.00        | 40479.30    | 0.05  |
|           | 1h   | 44786700.00        | 155179.00   | 0.35  |
|           | 2h   | 21628500.00        | 145273.00   | 0.67  |
|           | 3h   | 21775200.00        | 250679.00   | 1.14  |
|           | 4h   | 21329300.00        | 315149.00   | 1.46  |
|           | 5h   | 21311100.00        | 385238.00   | 1.78  |
|           | 6h   | 19894100.00        | 428487.00   | 2.11  |
|           | 7h   | 18193300.00        | 399583.00   | 2.15  |
|           | 8h   | 20448000.00        | 646966.00   | 3.07  |
|           | 24h  | 18792300.00        | 1857350.00  | 8.99  |
|           | 48h  | 31783000.00        | 5390500.00  | 14.50 |

Table S123 1 molar equivalent of  $[\text{dm3-mTBDH}][\text{OAc}]$  and 0.2 molar equivalent of water.

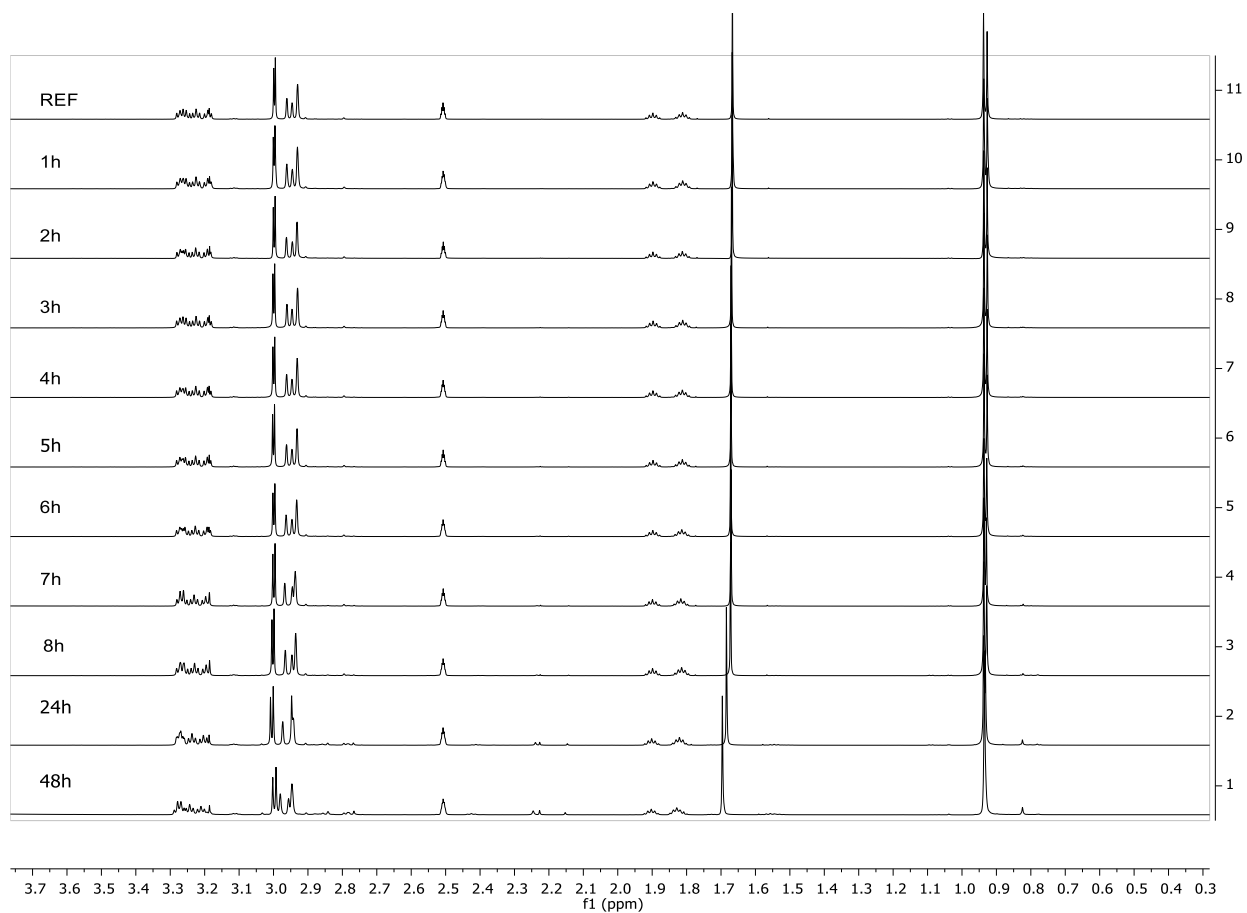

Figure S122  $^1\text{H}$  NMR 1 molar equivalent of  $[\text{dm}3\text{-mTBDH}][\text{OAc}]$  and 0.2 molar equivalent of water.

| Structure | Time | Integral N-Methyls | Integral HP | % HP  |
|-----------|------|--------------------|-------------|-------|
|           | REF  | 81801100.00        | 0.00        | 0.00  |
|           | 1h   | 82831900.00        | 292440.00   | 0.35  |
|           | 2h   | 20990400.00        | 181960.00   | 0.86  |
|           | 3h   | 19901200.00        | 284181.00   | 1.41  |
|           | 4h   | 20785800.00        | 438545.00   | 2.07  |
|           | 5h   | 20436200.00        | 557636.00   | 2.66  |
|           | 6h   | 135233000.00       | 4678500.00  | 3.34  |
|           | 7h   | 17654500.00        | 742448.00   | 4.04  |
|           | 8h   | 17642200.00        | 854728.00   | 4.62  |
|           | 24h  | 16780200.00        | 2653280.00  | 13.65 |
|           | 48h  | 28229600.00        | 8228650.00  | 22.57 |

Table S124 1 molar equivalent of  $[\text{dm}3\text{-mTBDH}][\text{OAc}]$  and 0.5 molar equivalent of water.

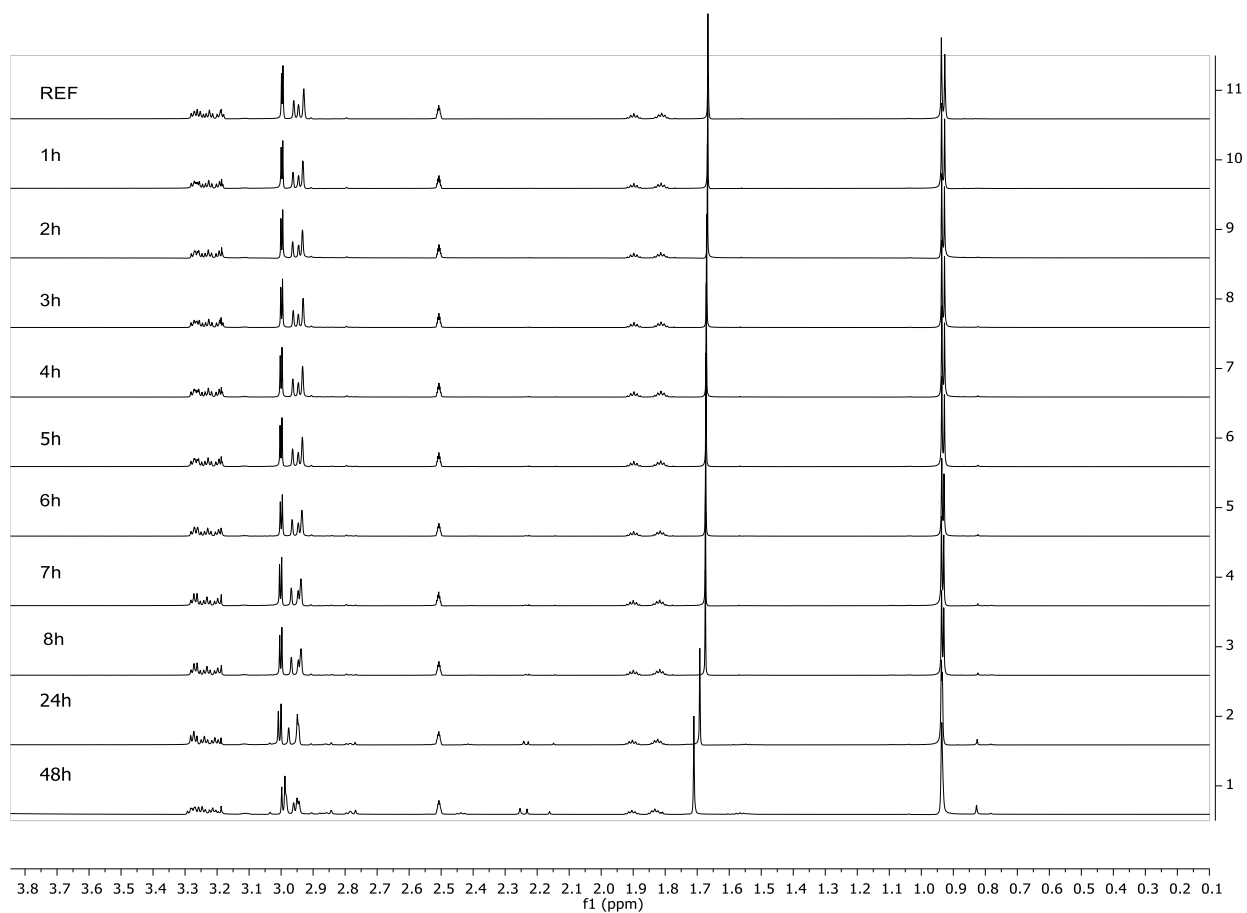

Figure S123  $^1\text{H}$  NMR 1 molar equivalent of  $[\text{dm3-mTBDH}][\text{OAc}]$  and 0.5 molar equivalent of water.

| Structure | Time | Integral N-Methyls | Integral HP | % HP  |
|-----------|------|--------------------|-------------|-------|
|           | REF  | 85621600.00        | 0.00        | 0.00  |
|           | 1h   | 82394100.00        | 250506.00   | 0.30  |
|           | 2h   | 81392400.00        | 840100.00   | 1.02  |
|           | 3h   | 21405300.00        | 361591.00   | 1.66  |
|           | 4h   | 19925100.00        | 498824.00   | 2.44  |
|           | 5h   | 20718400.00        | 635184.00   | 2.97  |
|           | 6h   | 18946600.00        | 750779.00   | 3.81  |
|           | 7h   | 16509700.00        | 779453.00   | 4.51  |
|           | 8h   | 17045200.00        | 920399.00   | 5.12  |
|           | 24h  | 15094000.00        | 2634270.00  | 14.86 |
|           | 48h  | 23651500.00        | 7643870.00  | 24.42 |

Table S125 1 molar equivalent of  $[\text{dm3-mTBDH}][\text{OAc}]$  and 1 molar equivalent of water.

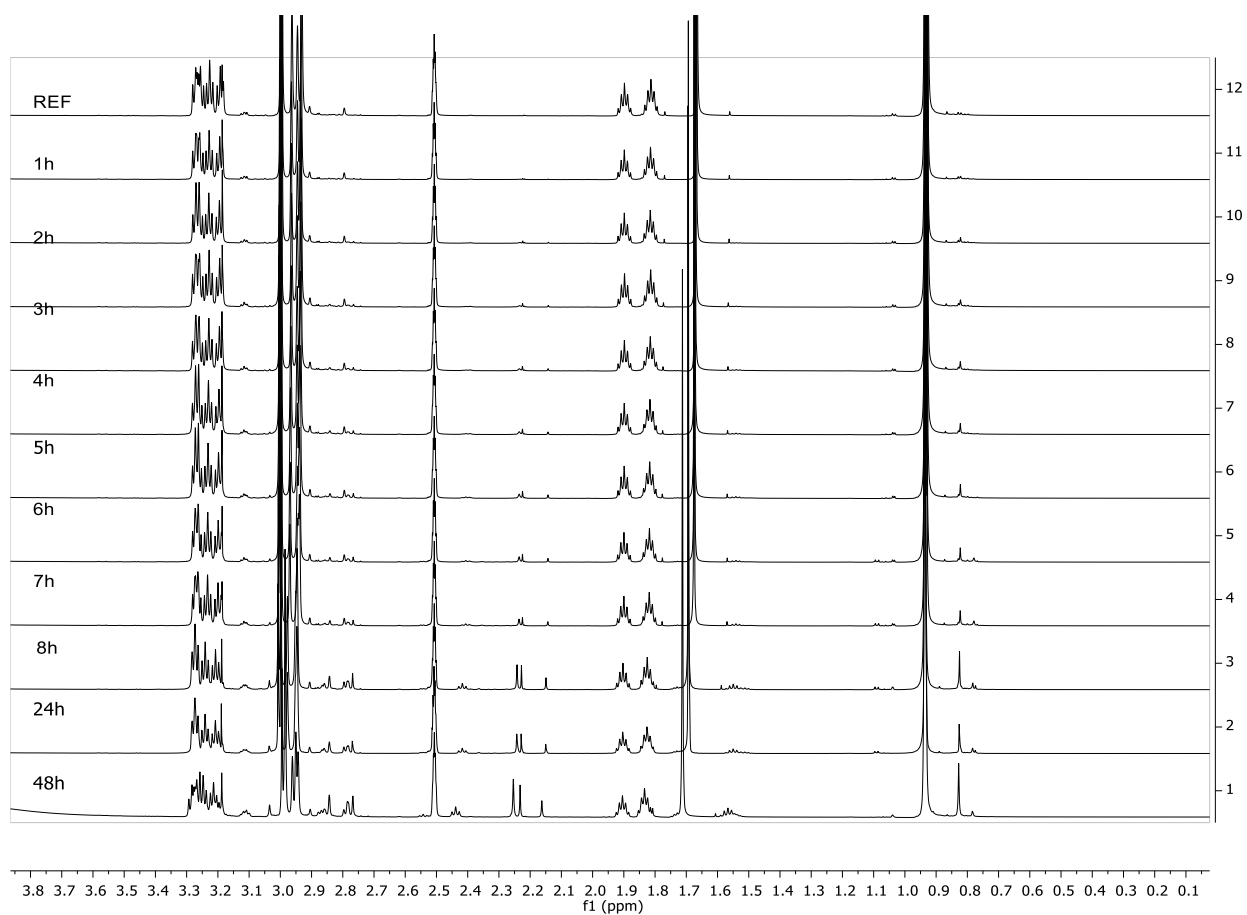

Figure S124 <sup>1</sup>H NMR 1 molar equivalent of [dm3-mTBDH][OAc] and 1 molar equivalent of water.

| Structure | Time | Integral N-Methyls | Integral HP Total | % HP |
|-----------|------|--------------------|-------------------|------|
|           | REF  | 26530000.00        | 0.00              | 0.00 |
|           | 1h   | 14182900.00        | 31269.90          | 0.22 |
|           | 2h   | 59369500.00        | 149758.00         | 0.25 |
|           | 3h   | 16920800.00        | 45830.00          | 0.27 |
|           | 4h   | 13295400.00        | 42602.60          | 0.32 |
|           | 5h   | 12511800.00        | 42147.70          | 0.34 |
|           | 6h   | 11707300.00        | 42654.80          | 0.36 |
|           | 7h   | 12693200.00        | 50097.40          | 0.39 |
|           | 8h   | 11973500.00        | 46929.60          | 0.39 |
|           | 24h  | 15202300.00        | 144959.00         | 0.94 |
|           | 48h  | 31257400.00        | 1503820.00        | 4.59 |

Table S126 1 molar equivalent of [dm3-mTBDH][OAc] and 5 molar equivalent of water.

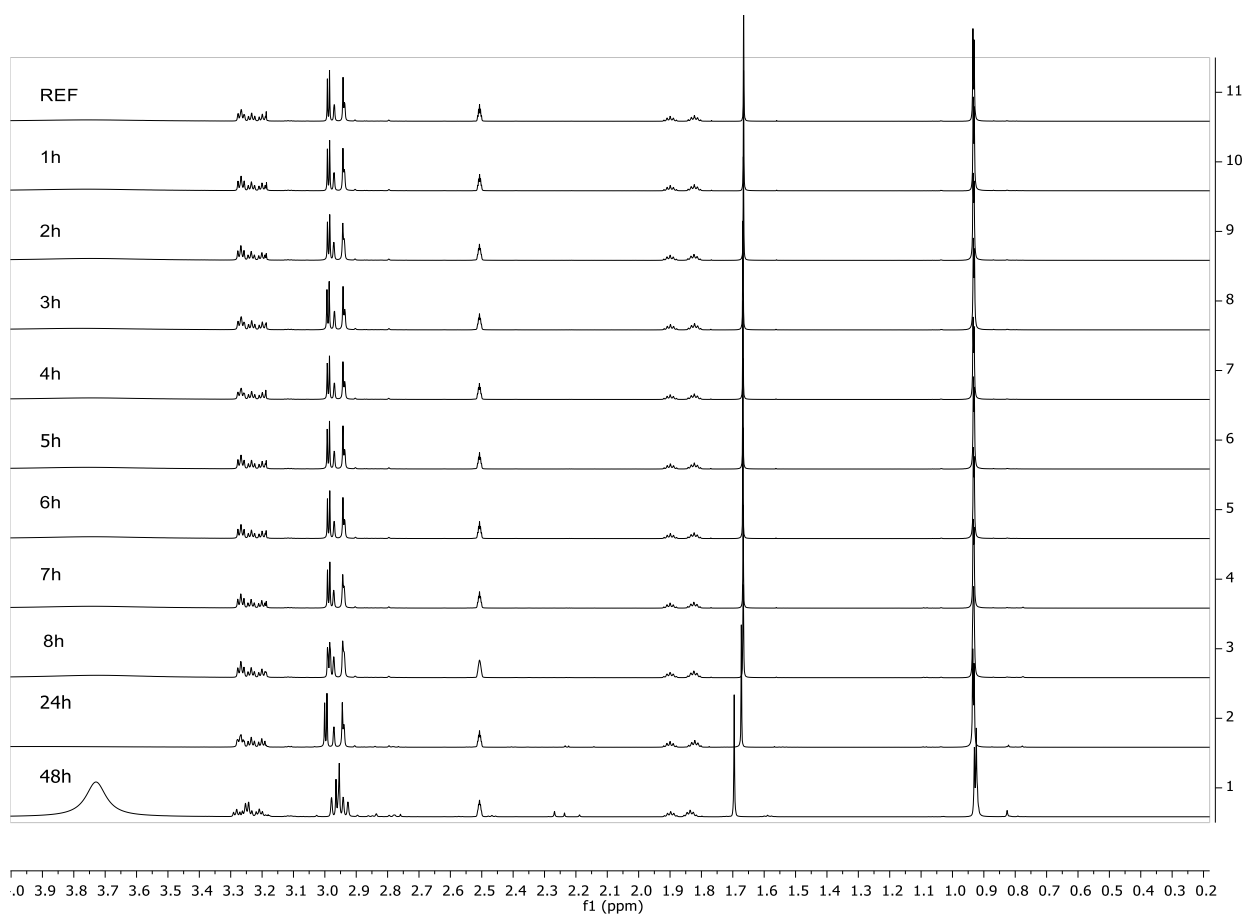

Figure S125  $^1\text{H}$  NMR 1 molar equivalent of  $[\text{dm}3\text{-mTBDH}][\text{OAc}]$  and 5 molar equivalent of water.

| Structure | Time | Integral N-Methyls | Integral HP | % HP  |
|-----------|------|--------------------|-------------|-------|
|           | REF  | 64378800.00        | 81681.30    | 0.00  |
|           | 1h   | 68330200.00        | 99010.80    | 0.14  |
|           | 2h   | 17015600.00        | 39618.80    | 0.23  |
|           | 3h   | 17813500.00        | 44936.60    | 0.25  |
|           | 4h   | 15457400.00        | 39859.10    | 0.26  |
|           | 5h   | 16906300.00        | 50120.90    | 0.30  |
|           | 6h   | 14656000.00        | 79161.80    | 0.54  |
|           | 7h   | 14743400.00        | 97503.80    | 0.66  |
|           | 8h   | 13639600.00        | 126845.00   | 0.92  |
|           | 24h  | 18282600.00        | 818673.00   | 4.29  |
|           | 48h  | 26847000.00        | 4359210.00  | 13.97 |

Table S127 1 molar equivalent of  $[\text{dm}3\text{-mTBDH}][\text{OAc}]$  and 10 molar equivalent of water.

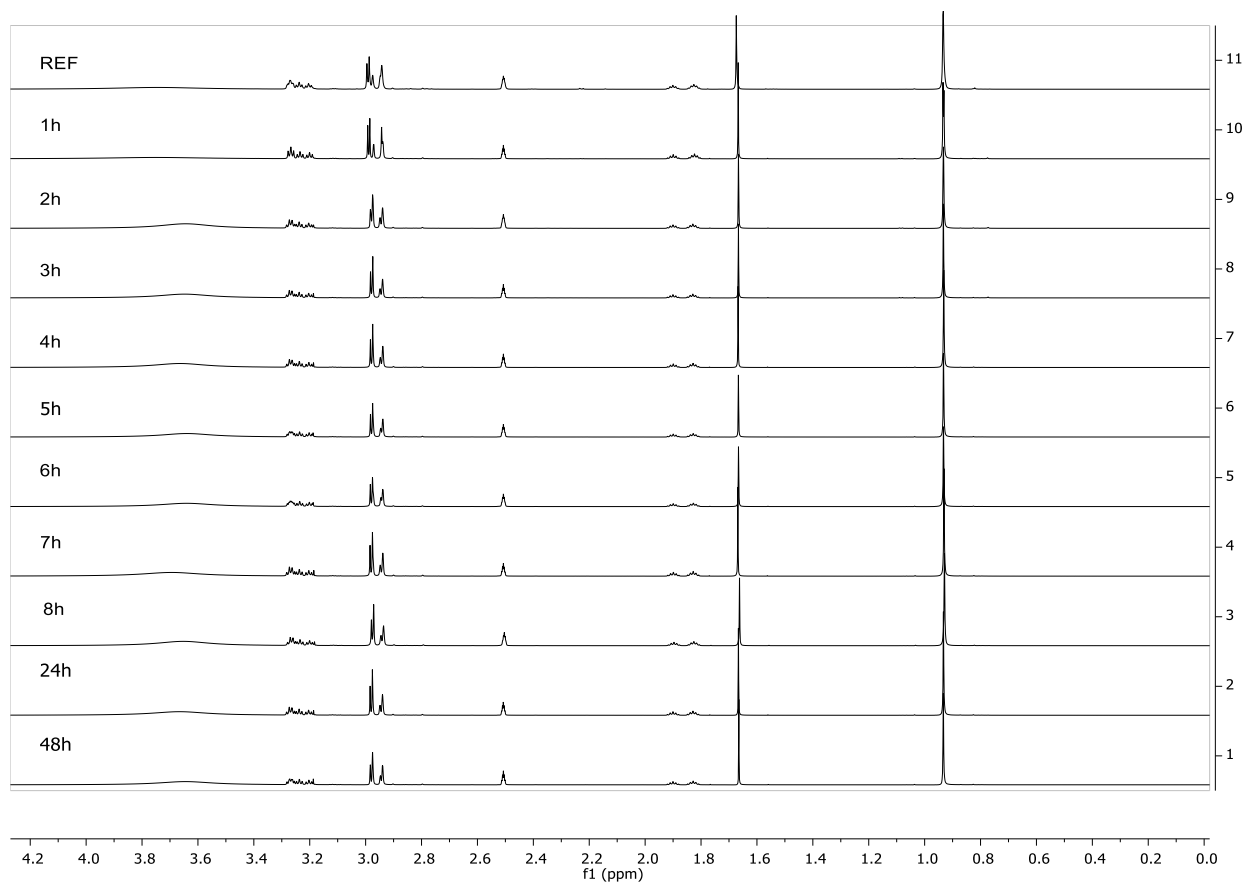

Figure S126 <sup>1</sup>H NMR 1 molar equivalent of [dm3-mTBDH][OAc] and 10 molar equivalent of water.

12. m2-mTBD + water

| Structure                                                                           | Time | Integral N-Methyls | Integral HP | % HP  |
|-------------------------------------------------------------------------------------|------|--------------------|-------------|-------|
| 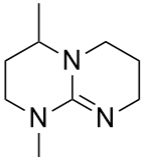 | REF  | 175570000.00       | 25653.50    | 0.01  |
|                                                                                     | 1h   | 113922000.00       | 3568500.00  | 3.04  |
|                                                                                     | 2h   | 163310000.00       | 12685100.00 | 7.21  |
|                                                                                     | 3h   | 94630200.00        | 10605400.00 | 10.08 |
|                                                                                     | 4h   | 160835000.00       | 30191400.00 | 15.80 |
|                                                                                     | 5h   | 162374000.00       | 30600500.00 | 15.86 |
|                                                                                     | 6h   | 98907300.00        | 21116800.00 | 17.59 |
|                                                                                     | 7h   | 136984000.00       | 33113800.00 | 19.47 |
|                                                                                     | 8h   | 81642700.00        | 21640000.00 | 20.95 |
|                                                                                     | 24h  | 89501000.00        | 64124000.00 | 41.74 |
|                                                                                     | 48h  | 60679200.00        | 69011400.00 | 53.21 |

Table S128 1 molar equivalent of m2-mTBD and 1 molar equivalent of water.

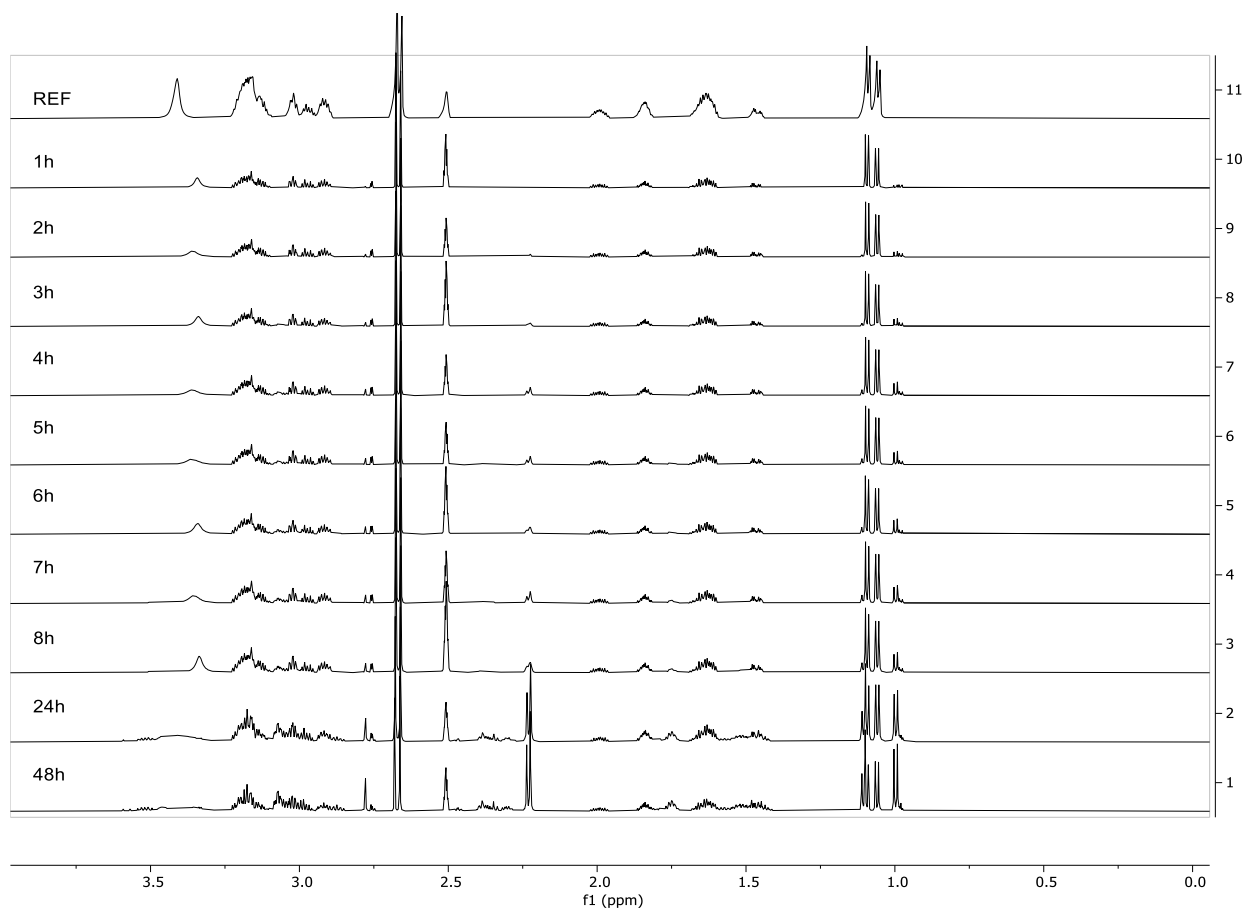

Figure S127 <sup>1</sup>H NMR 1 molar equivalent of m2-mTBD and 1 molar equivalent of water.

| Structure                                                                           | Time | Integral N-Methyls | integral HP  | % HP  |
|-------------------------------------------------------------------------------------|------|--------------------|--------------|-------|
| 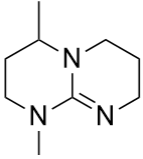 | REF  | 119398000.00       | 30957.10     | 0.03  |
|                                                                                     | 1h   | 25754000.00        | 58524500.00  | 69.44 |
|                                                                                     | 2h   | 6463050.00         | 89417100.00  | 93.26 |
|                                                                                     | 3h   | 149593.00          | 101904000.00 | 99.85 |
|                                                                                     | 4h   | 70673.00           | 84192600.00  | 99.92 |
|                                                                                     | 5h   | 63569.10           | 98459600.00  | 99.94 |
|                                                                                     | 6h   | 115458.00          | 99338000.00  | 99.88 |
|                                                                                     | 7h   | 93672.30           | 94499000.00  | 99.90 |
|                                                                                     | 8h   | 102393.00          | 88188300.00  | 99.88 |
|                                                                                     | 24h  | 201593.00          | 88808200.00  | 99.77 |
|                                                                                     | 48h  | 180559.00          | 72592800.00  | 99.75 |

Table S129 1 molar equivalent of m2-mTBD and 5 molar equivalents of water.



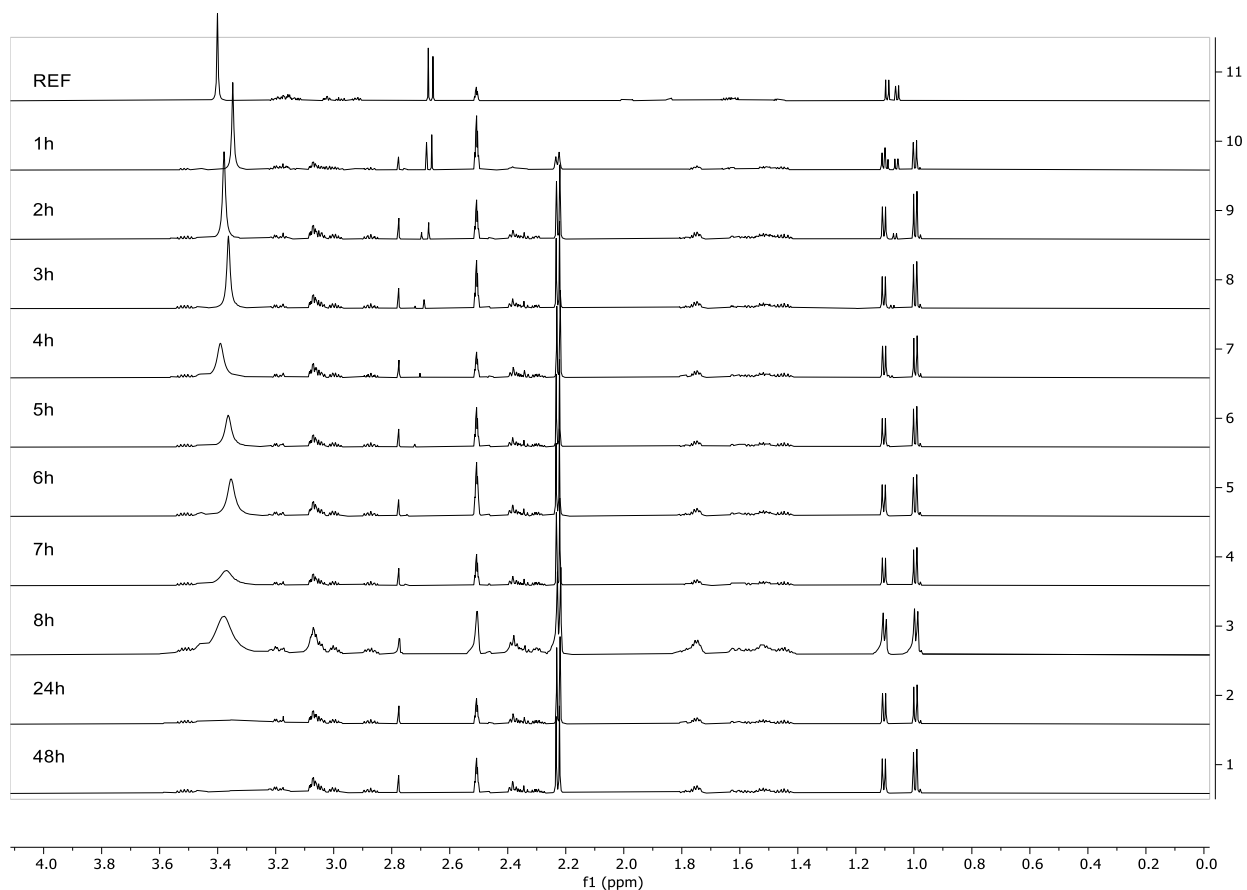

Figure S128  $^1\text{H}$  NMR 1 molar equivalent of *m2-mTBD* and 5 molar equivalents of water.

| Structure | Time | Integral N-Methyl 1 | Integral HP | % HP  |
|-----------|------|---------------------|-------------|-------|
|           | REF  | 81831600.00         | 179220.00   | 0.22  |
|           | 1h   | 136563.00           | 56006700.00 | 99.76 |
|           | 2h   | 540111.00           | 71540500.00 | 99.25 |
|           | 3h   | 279126.00           | 44451300.00 | 99.38 |
|           | 4h   | 579165.00           | 78031900.00 | 99.26 |
|           | 5h   | 581767.00           | 80161600.00 | 99.28 |
|           | 6h   | 614256.00           | 68265300.00 | 99.11 |
|           | 7h   | 877760.00           | 79730800.00 | 98.91 |
|           | 8h   | 577933.00           | 63026400.00 | 99.09 |
|           | 24h  | 942660.00           | 90959600.00 | 98.97 |
|           | 48h  | 957250.00           | 72830700.00 | 98.70 |

Table S130 1 molar equivalent of *m2-mTBD* and 10 molar equivalents of water.

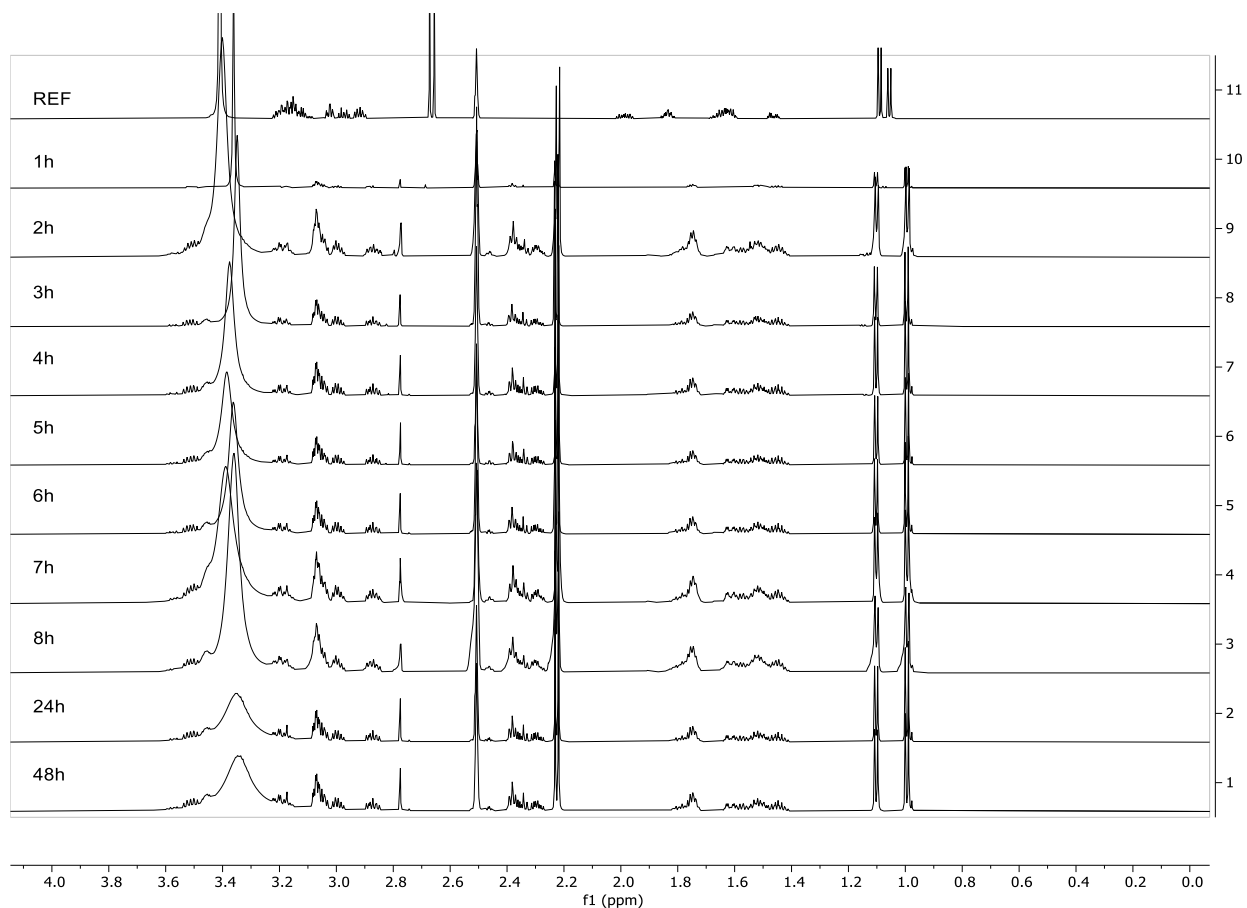

Figure S129  $^1\text{H}$  NMR 1 molar equivalent of *m2-mTBD* and 10 molar equivalents of water.

13. [*m2-mTBDH*][OAc] + water

| Structure | Time | integral N-Methyls | integral HP | % HP |
|-----------|------|--------------------|-------------|------|
|           | REF  | 121532000.00       | 0.00        | 0.00 |
|           | 1h   | 158821000.00       | 0.00        | 0.00 |
|           | 2h   | 130505000.00       | 11438.70    | 0.01 |
|           | 3h   | 111235000.00       | 11988.70    | 0.01 |
|           | 4h   | 154623000.00       | 70493.20    | 0.05 |
|           | 5h   | 136963000.00       | 170471.00   | 0.12 |
|           | 6h   | 127065000.00       | 217156.00   | 0.17 |
|           | 24h  | 140220000.00       | 4260860.00  | 2.95 |
|           | 48h  | 116144000.00       | 4629090.00  | 3.83 |

Table S131 1 molar equivalent of [*m2-mTBDH*][OAc] and 1 molar equivalent of water

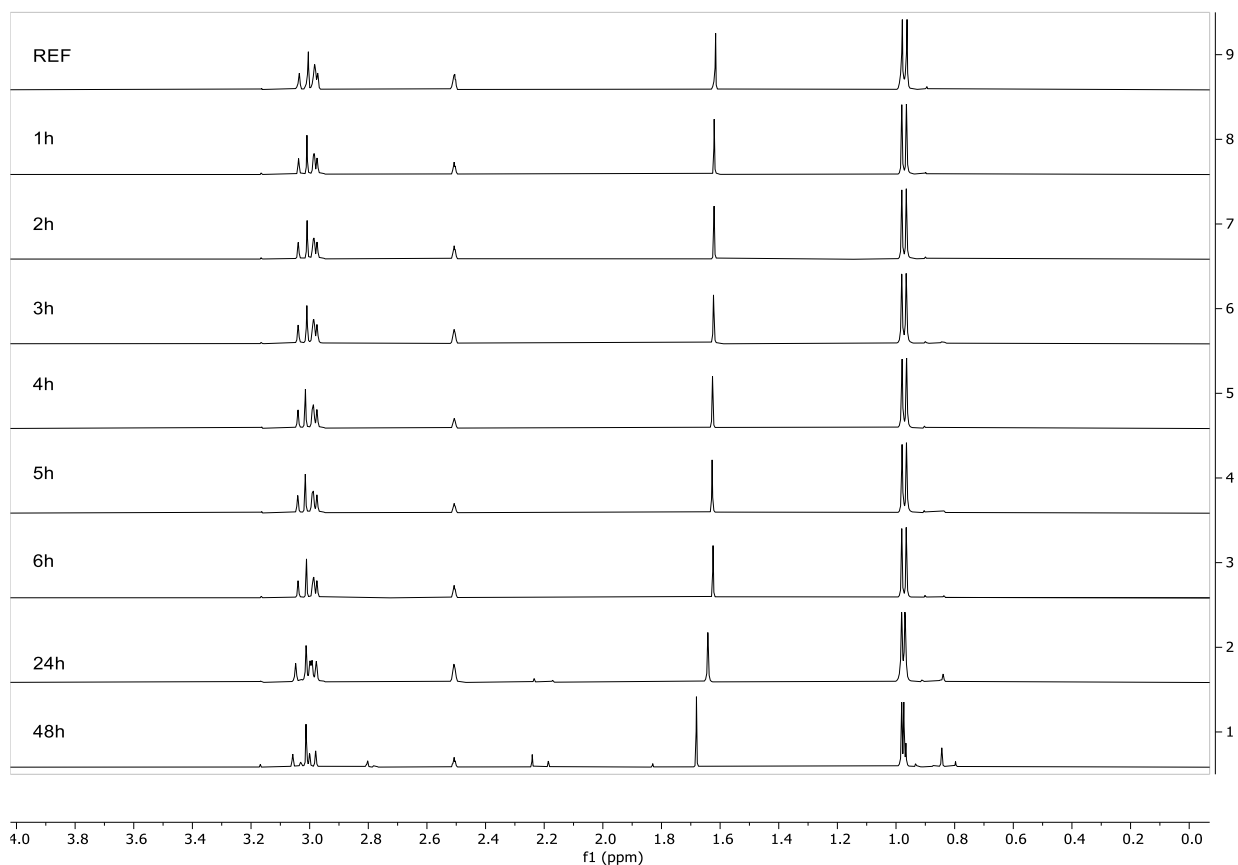

Figure S130  $^1\text{H}$  NMR 1 molar equivalent of [m2-mTBDH][OAc] and 1 molar equivalent of water

| Structure | Time | Integral N-Methyls | Integral HP | % HP |
|-----------|------|--------------------|-------------|------|
|           | REF  | 91603600.00        | 16450.30    | 0.02 |
|           | 1h   | 80429700.00        | 56326.30    | 0.07 |
|           | 2h   | 77806800.00        | 73770.30    | 0.09 |
|           | 3h   | 62384400.00        | 72907.80    | 0.12 |
|           | 4h   | 80910600.00        | 103888.00   | 0.13 |
|           | 5h   | 85839800.00        | 151706.00   | 0.18 |
|           | 6h   | 88269700.00        | 354764.00   | 0.40 |
|           | 7h   | 91495600.00        | 184078.00   | 0.20 |
|           | 8h   | 86617100.00        | 191821.00   | 0.22 |
|           | 24h  | 84997600.00        | 578783.00   | 0.68 |
|           | 48h  | 88409800.00        | 759733.00   | 0.85 |

Table S132 1 molar equivalent of [m2-mTBDH][OAc] and 5 molar equivalent of water.

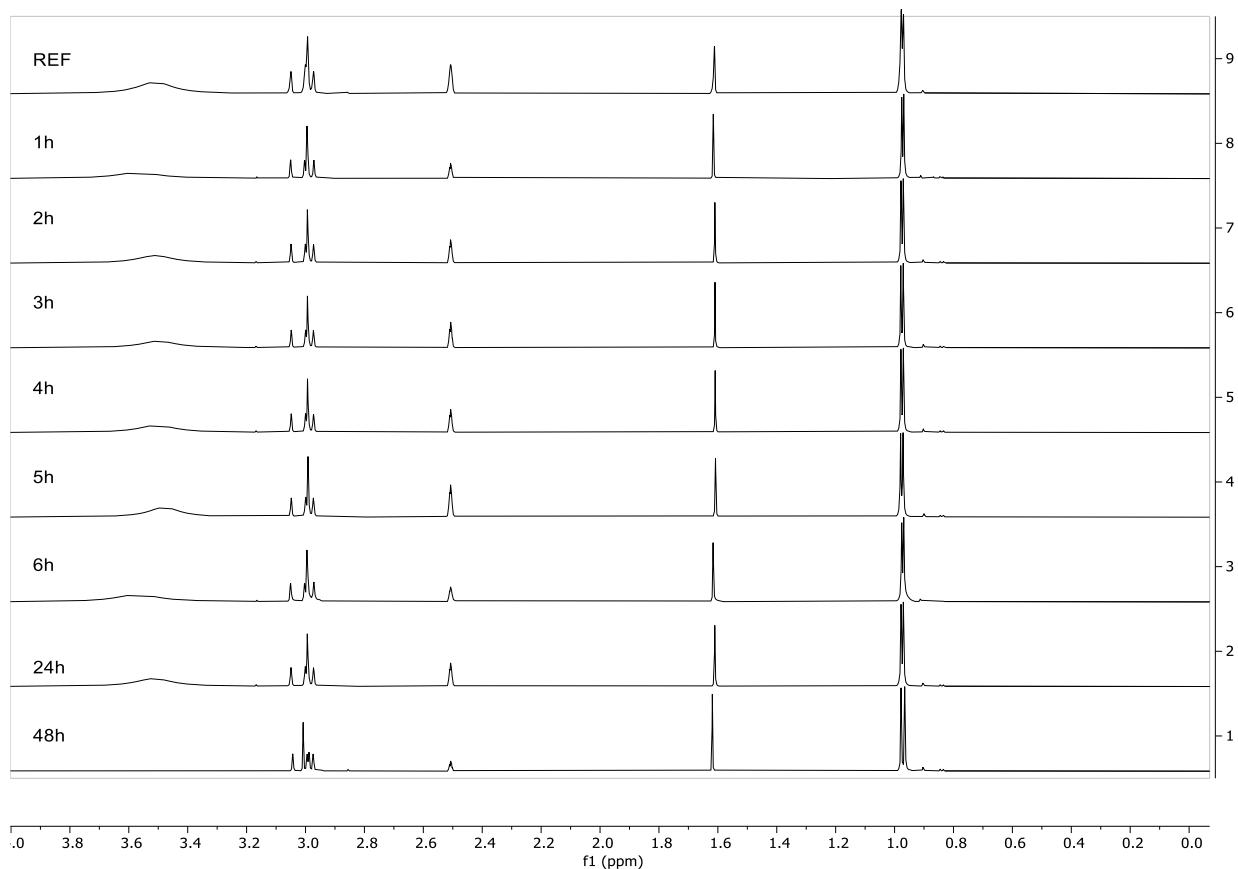

Figure S131 <sup>1</sup>H NMR 1 molar equivalent of [m2-mTBDH][OAc] and 5 molar equivalent of water.

| Structure | Time | Integral N Methyls   | Integral HP       | % HP |
|-----------|------|----------------------|-------------------|------|
|           | REF  | 6516860000000000.00  | 65647400000000.00 | 0.10 |
|           | 1h   | 10166300000000000.00 | 11628000000000.00 | 0.11 |
|           | 2h   | 21450100000000000.00 | 27307600000000.00 | 0.13 |
|           | 3h   | 7138840000000000.00  | 9401840000000.00  | 0.13 |
|           | 4h   | 10383000000000000.00 | 16019200000000.00 | 0.15 |
|           | 5h   | 20818900000000000.00 | 34186800000000.00 | 0.16 |
|           | 6h   | 22103600000000000.00 | 38744800000000.00 | 0.17 |
|           | 7h   | 16392700000000000.00 | 27569200000000.00 | 0.17 |
|           | 8h   | 25885900000000000.00 | 46710000000000.00 | 0.18 |
|           | 24h  | 98800400000000000.00 | 23709800000000.00 | 0.24 |
|           | 48h  | 7912300000000000.00  | 63436500000000.00 | 0.80 |

Table S133 1 molar equivalent of [m2-mTBDH][OAc] and 10 molar equivalent of water.

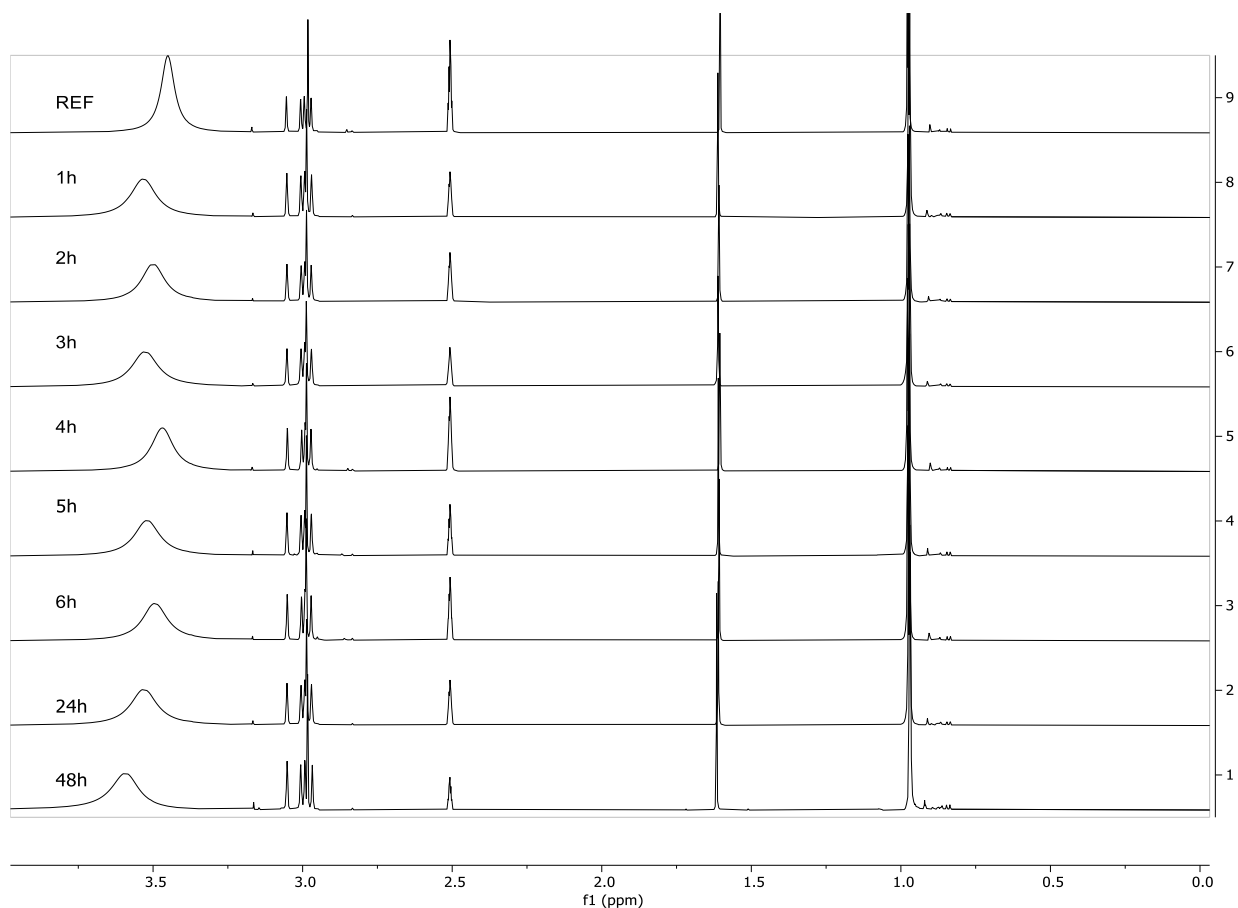

Figure S132  $^1\text{H}$  NMR 1 molar equivalent of  $[\text{m}2\text{-mTBDH}][\text{OAc}]$  and 10 molar equivalent of water.

## II. Half-time calculation

When the half-time is reached during the experiment, the value is readable from the plot using the experimental data. When the half-time is not reached during the experiment, the value is calculated using the function fitting as close as possible to our data. The obtained value is an estimation and may differ from experimental data.

### 1. SB and their salts with pure water at 90°C

| Molecule                     | Water equivalents | Half-time in hours        |
|------------------------------|-------------------|---------------------------|
| mTBD                         | 0.2               | 8                         |
| mTBD                         | 0.5               | 6                         |
| mTBD                         | 1                 | 8                         |
| mTBD                         | 1.3               | 4.7                       |
| mTBD                         | 2                 | 1                         |
| mTBD                         | 5                 | 0.5                       |
| mTBD                         | 10                | 0.5                       |
| $[\text{mTBDH}][\text{OAc}]$ | 0.2               | Over 48h. non-predictable |
| $[\text{mTBDH}][\text{OAc}]$ | 0.5               | Over 48h. non-predictable |
| $[\text{mTBDH}][\text{OAc}]$ | 1                 | Over 48h. non-predictable |
| $[\text{mTBDH}][\text{OAc}]$ | 5                 | Over 48h. non-predictable |
| $[\text{mTBDH}][\text{OAc}]$ | 10                | Over 48h. non-predictable |

|                     |     |                           |
|---------------------|-----|---------------------------|
| mTBN                | 0.2 | Over 48h. non-predictable |
| mTBN                | 0.5 | Over 48h. non-predictable |
| mTBN                | 1   | Over 48h. non-predictable |
| mTBN                | 1.5 | Over 48h. non-predictable |
| mTBN                | 3   | 18.5                      |
| mTBN                | 5   | 2.3                       |
| mTBN                | 10  | 0.86                      |
| [mTBNH][OAc]        | 0.2 | Over 48h. non-predictable |
| [mTBNH][OAc]        | 0.5 | Over 48h. non-predictable |
| [mTBNH][OAc]        | 1   | Over 48h. non-predictable |
| [mTBNH][OAc]        | 5   | Over 48h. non-predictable |
| [mTBNH][OAc]        | 10  | Over 48h. non-predictable |
| mTBO                | 0.2 | Over 48h. non-predictable |
| mTBO                | 0.5 | Over 48h. non-predictable |
| mTBO                | 1   | Over 48h. non-predictable |
| mTBO                | 5   | 1.33                      |
| mTBO                | 10  | 0.76                      |
| dm39-mTBD           | 1   | 35.3                      |
| dm39-mTBD           | 5   | 0.72                      |
| dm39-mTBD           | 10  | 0.5                       |
| [dm39-mTBDH][OAc]   | 1   | Over 48h. non-predictable |
| [dm39-mTBDH][OAc]   | 5   | Over 48h. non-predictable |
| [dm39-mTBDH][OAc]   | 10  | Over 48h. non-predictable |
| dm3-m0-mTBD         | 1   | 42                        |
| dm3-m0-mTBD         | 5   | 2.9                       |
| dm3-m0-mTBD         | 10  | 2                         |
| [dm3-m0-mTBDH][OAc] | 1   | Over 48h. non-predictable |
| [dm3-m0-mTBDH][OAc] | 5   | Over 48h. non-predictable |
| [dm3-m0-mTBDH][OAc] | 10  | Over 48h. non-predictable |
| dm3-mTBD            | 0.2 | 3.6                       |
| dm3-mTBD            | 0.5 | 3.5                       |
| dm3-mTBD            | 1   | 6                         |
| dm3-mTBD            | 1.5 | 7.6                       |
| dm3-mTBD            | 3   | 1.65                      |
| dm3-mTBD            | 5   | 1                         |
| dm3-mTBD            | 10  | 0.65                      |
| [dm3-mTBDH][OAc]    | 0.2 | 28.5                      |
| [dm3-mTBDH][OAc]    | 0.5 | Over 48h. non-predictable |
| [dm3-mTBDH][OAc]    | 1   | Over 48h. non-predictable |
| [dm3-mTBDH][OAc]    | 5   | Over 48h. non-predictable |
| [dm3-mTBDH][OAc]    | 10  | Over 48h. non-predictable |
| m2-mTBD             | 1   | 41.2                      |
| m2-mTBD             | 5   | 0.72                      |
| m2-mTBD             | 10  | 0.5                       |
| [m2-mTBDH][OAc]     | 1   | Over 48h. non-predictable |

|                              |     |                           |
|------------------------------|-----|---------------------------|
| [m2-mTBDH][OAc]              | 5   | Over 48h. non-predictable |
| [m2-mTBDH][OAc]              | 10  | Over 48h. non-predictable |
| [mTBDH][ClOAc]               | 0.2 | Over 48h. non-predictable |
| [mTBDH][ClOAc]               | 0.5 | Over 48h. non-predictable |
| [mTBDH][ClOAc]               | 1   | Over 48h. non-predictable |
| [mTBDH][ClOAc]               | 5   | Over 48h. non-predictable |
| [mTBDH][ClOAc]               | 10  | Over 48h. non-predictable |
| [mTBDH][Cl <sub>2</sub> OAc] | 0.2 | Over 48h. non-predictable |
| [mTBDH][Cl <sub>2</sub> OAc] | 0.5 | Over 48h. non-predictable |
| [mTBDH][Cl <sub>2</sub> OAc] | 1   | Over 48h. non-predictable |
| [mTBDH][Cl <sub>2</sub> OAc] | 5   | Over 48h. non-predictable |
| [mTBDH][Cl <sub>2</sub> OAc] | 10  | Over 48h. non-predictable |
| [mTBDH][Cl <sub>3</sub> OAc] | 0.2 | Over 48h. non-predictable |
| [mTBDH][Cl <sub>3</sub> OAc] | 0.5 | Over 48h. non-predictable |
| [mTBDH][Cl <sub>3</sub> OAc] | 1   | Over 48h. non-predictable |
| [mTBDH][Cl <sub>3</sub> OAc] | 5   | Over 48h. non-predictable |
| [mTBDH][Cl <sub>3</sub> OAc] | 10  | Over 48h. non-predictable |
| [mTBNH][ClOAc]               | 0.2 | Over 48h. non-predictable |
| [mTBNH][ClOAc]               | 0.5 | Over 48h. non-predictable |
| [mTBNH][ClOAc]               | 1   | Over 48h. non-predictable |
| [mTBNH][ClOAc]               | 5   | Over 48h. non-predictable |
| [mTBNH][ClOAc]               | 10  | Over 48h. non-predictable |
| [mTBNH][Cl <sub>2</sub> OAc] | 0.2 | Over 48h. non-predictable |
| [mTBNH][Cl <sub>2</sub> OAc] | 0.5 | Over 48h. non-predictable |
| [mTBNH][Cl <sub>2</sub> OAc] | 1   | Over 48h. non-predictable |
| [mTBNH][Cl <sub>2</sub> OAc] | 5   | Over 48h. non-predictable |
| [mTBNH][Cl <sub>2</sub> OAc] | 10  | Over 48h. non-predictable |
| [mTBNH][Cl <sub>3</sub> OAc] | 0.2 | Over 48h. non-predictable |
| [mTBNH][Cl <sub>3</sub> OAc] | 0.5 | Over 48h. non-predictable |
| [mTBNH][Cl <sub>3</sub> OAc] | 1   | Over 48h. non-predictable |
| [mTBNH][Cl <sub>3</sub> OAc] | 5   | Over 48h. non-predictable |
| [mTBNH][Cl <sub>3</sub> OAc] | 10  | Over 48h. non-predictable |

Table S134 Half-life of SB and their corresponding salt.

2. Superbase and their acetate salt in presence of water and co-solvent at 90°C

| Molecule     | Water equivalents | Co-solvent      | Co-solvent equivalents | Half-time in hours        |
|--------------|-------------------|-----------------|------------------------|---------------------------|
| [mTBDH][OAc] | 1                 | DMSO            | 0.2                    | Over 48h. non-predictable |
| [mTBDH][OAc] | 1                 | DMSO            | 0.5                    | Over 48h. non-predictable |
| [mTBDH][OAc] | 1                 | DMSO            | 1                      | Over 48h. non-predictable |
| [mTBDH][OAc] | 1                 | DMSO            | 2                      | Over 48h. non-predictable |
| mTBD         | 1                 | DMSO            | 0.2                    | 7.5                       |
| mTBD         | 1                 | DMSO            | 0.5                    | 15.1                      |
| mTBD         | 1                 | DMSO            | 1                      | 26.7                      |
| mTBD         | 1                 | DMSO            | 2                      | Over 48h. non-predictable |
| [mTBDH][OAc] | 1                 | Ethylene glycol | 0.2                    | Over 48h. non-predictable |
| [mTBDH][OAc] | 1                 | Ethylene glycol | 0.5                    | Over 48h. non-predictable |
| [mTBDH][OAc] | 1                 | Ethylene glycol | 1                      | Over 48h. non-predictable |
| [mTBDH][OAc] | 1                 | Ethylene glycol | 2                      | Over 48h. non-predictable |
| mTBD         | 1                 | Ethylene glycol | 0.2                    | 3.5                       |
| mTBD         | 1                 | Ethylene glycol | 0.5                    | 1.3                       |
| mTBD         | 1                 | Ethylene glycol | 1                      | 0.91                      |
| mTBD         | 1                 | Ethylene glycol | 2                      | 0.88                      |
| [mTBDH][OAc] | 1                 | Phenol          | 0.2                    | Over 48h. non-predictable |
| [mTBDH][OAc] | 1                 | Phenol          | 0.5                    | Over 48h. non-predictable |
| [mTBDH][OAc] | 1                 | Phenol          | 1                      | Over 48h. non-predictable |
| [mTBDH][OAc] | 1                 | Phenol          | 2                      | Over 48h. non-predictable |
| mTBD         | 1                 | Phenol          | 0.2                    | 2.98                      |
| mTBD         | 1                 | Phenol          | 0.5                    | 3.12                      |
| mTBD         | 1                 | Phenol          | 1                      | 8.5                       |
| mTBD         | 1                 | Phenol          | 2                      | 10.76                     |
| mTBD         | 1                 | Propanol        | 0.2                    | 5.8                       |
| mTBD         | 1                 | Propanol        | 0.5                    | 5.36                      |
| mTBD         | 1                 | Propanol        | 1                      | 5                         |
| mTBD         | 1                 | Propanol        | 2                      | 5.53                      |
| [mTBDH][OAc] | 1                 | Propanol        | 0.2                    | Over 48h. non-predictable |
| [mTBDH][OAc] | 1                 | Propanol        | 0.5                    | Over 48h. non-predictable |
| [mTBDH][OAc] | 1                 | Propanol        | 1                      | Over 48h. non-predictable |
| [mTBDH][OAc] | 1                 | Propanol        | 2                      | Over 48h. non-predictable |

Table S135 Half-life of SB and their corresponding salt in presence of co-solvent

### 3. SB and their acetate salts over a three days period at different temperature

| Molecule     | Water equivalents | Temperature | Half time                     |
|--------------|-------------------|-------------|-------------------------------|
| mTBD         | 1                 | 70°C        | 0.345 days (24.84h)           |
| mTBD         | 5                 | 70°C        | < 24h                         |
| mTBD         | 10                | 70°C        | < 24h                         |
| [mTBDH][OAc] | 0.2               | 70°C        | 8.1 days (194.4h)             |
| [mTBDH][OAc] | 0.5               | 70°C        | Over 12 days. non-predictable |



|              |    |      |                               |
|--------------|----|------|-------------------------------|
| [mTBDH][OAc] | 1  | 70°C | Over 12 days. non-predictable |
| mTBN         | 1  | 70°C | Over 12 days. non-predictable |
| mTBN         | 5  | 70°C | < 24h                         |
| mTBN         | 10 | 70°C | < 24h                         |
| [mTBNH][OAc] | 1  | 70°C | Over 12 days. non-predictable |
| [mTBNH][OAc] | 5  | 70°C | Over 12 days. non-predictable |
| [mTBNH][OAc] | 10 | 70°C | Over 12 days. non-predictable |

Table S136 Half-life of SB and their corresponding salt.

### III. Curves of hydrolysis

In this section, we collected the hydrolysis data obtained by NMR and plotted them together on a same graph for comparison. We first did this for each superbases (individually) in different water conditions. Then we plotted the data from an individual superbases + different co-solvent (individual again) amount with a constant water amount (here 1 molar equivalent according to the superbases). After that we repeated the same plotting but for the corresponding carboxylate salt.

#### 1. mTBD with different amounts of water

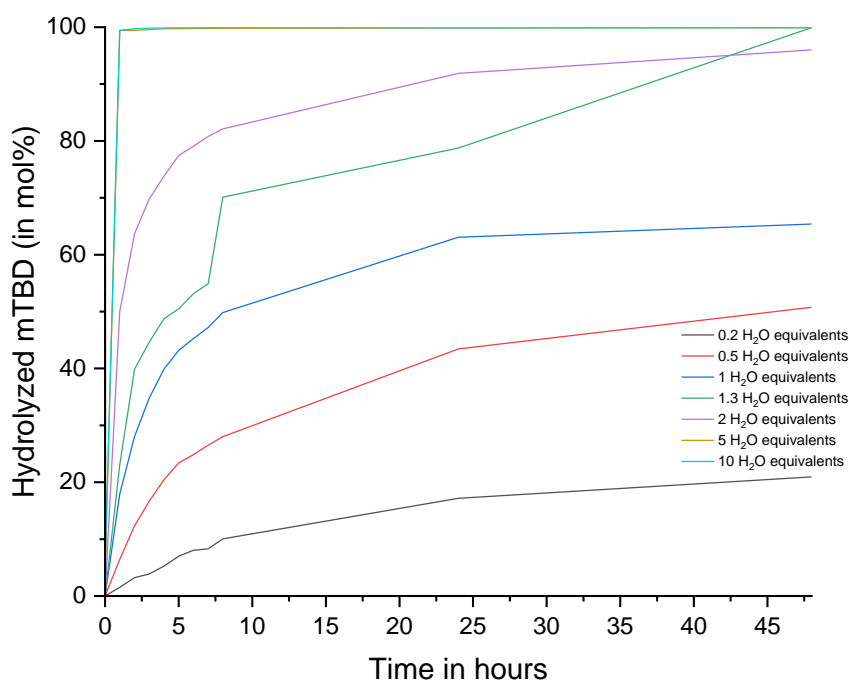

Figure S133 hydrolysis of mTBD with different water amounts.

#### 2. mTBD with different amounts of DMSO

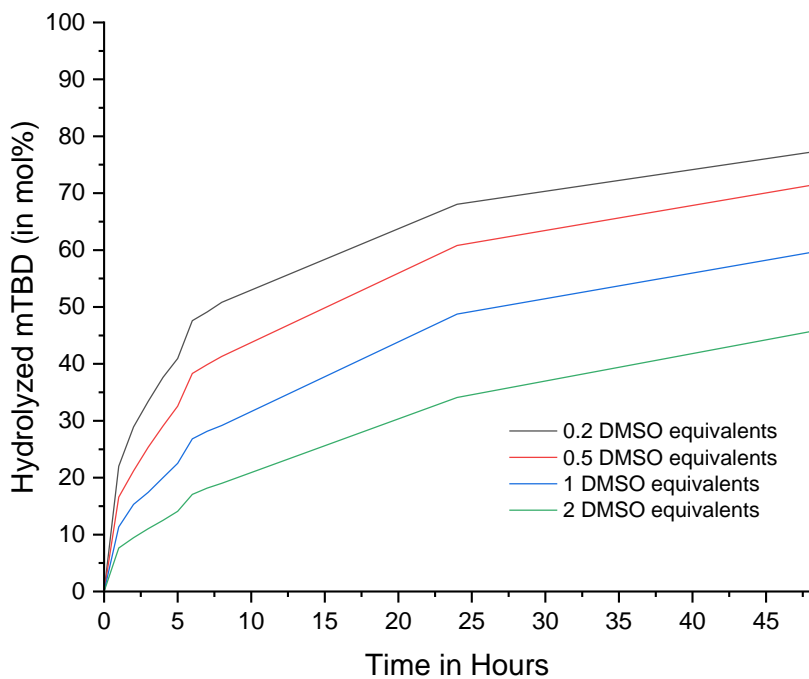

Figure S134 hydrolysis of mTBD + DMSO with different DMSO amounts.

### 3. mTBD with different amounts of Ethylene Glycol

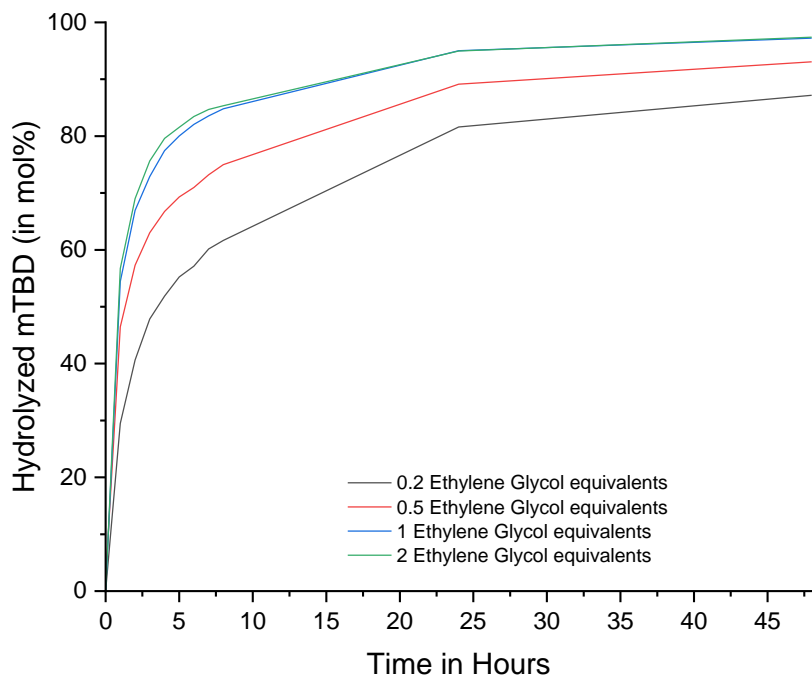

Figure S135 hydrolysis of mTBD + Ethylene Glycol with different Ethylene Glycol amounts.

#### 4. mTBD with different amounts of Phenol

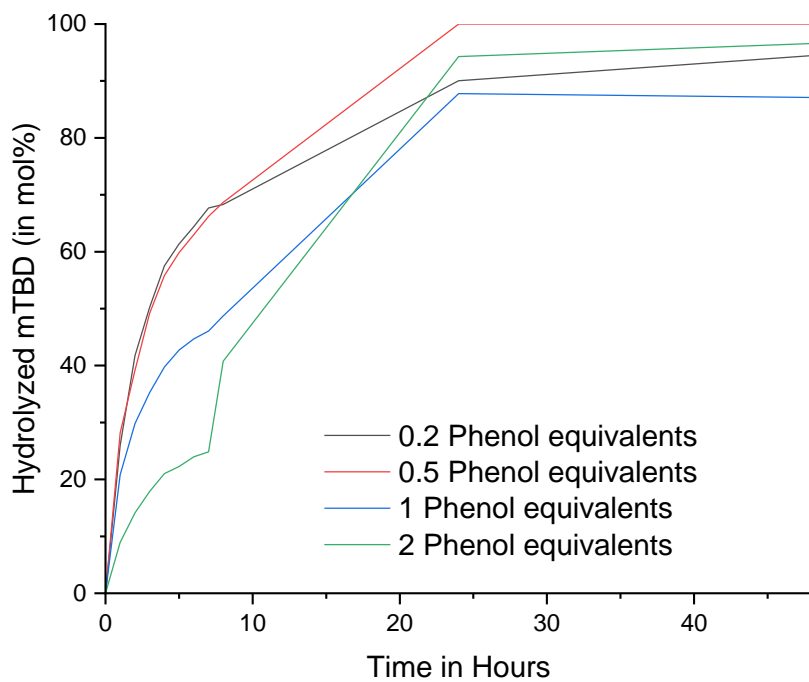

Figure S136 hydrolysis of mTBD + Phenol with different phenol amounts.

#### 5. mTBD with different amounts of Propanol

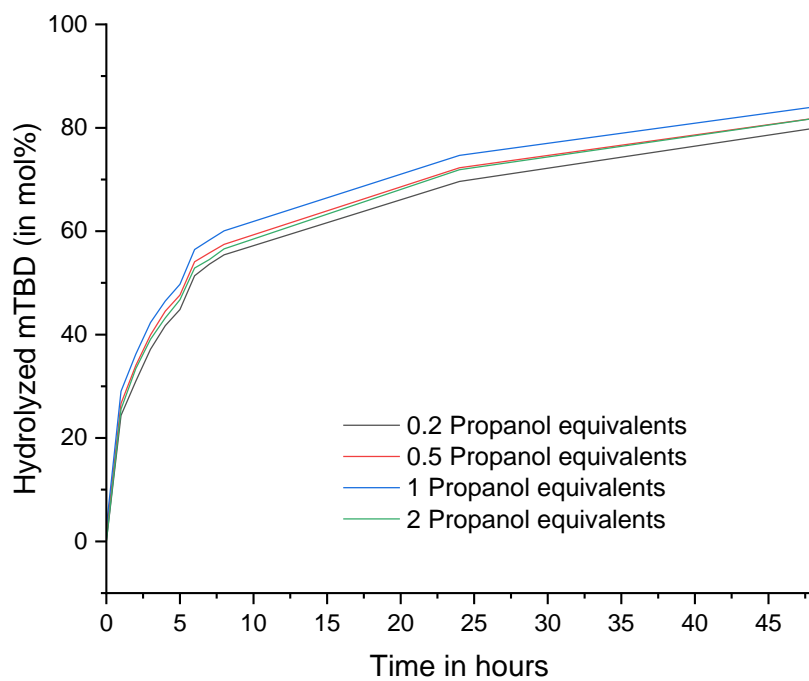

Figure S137 hydrolysis of mTBD + Propanol with different Propanol amounts.

6. mTBN with different amounts of water

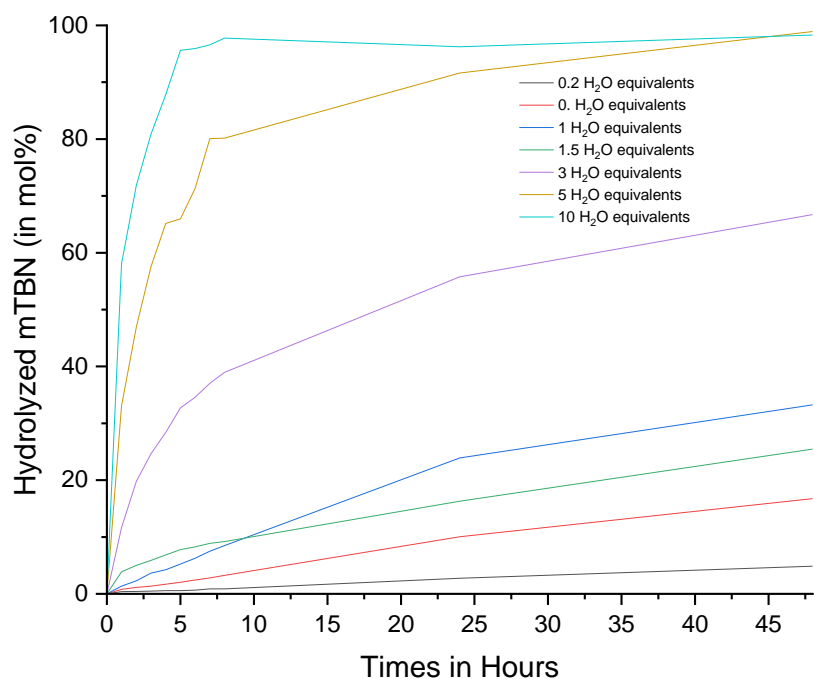

Figure S138 hydrolysis of mTBN with different water amounts.

7. dm39-mTBD with different amounts of water

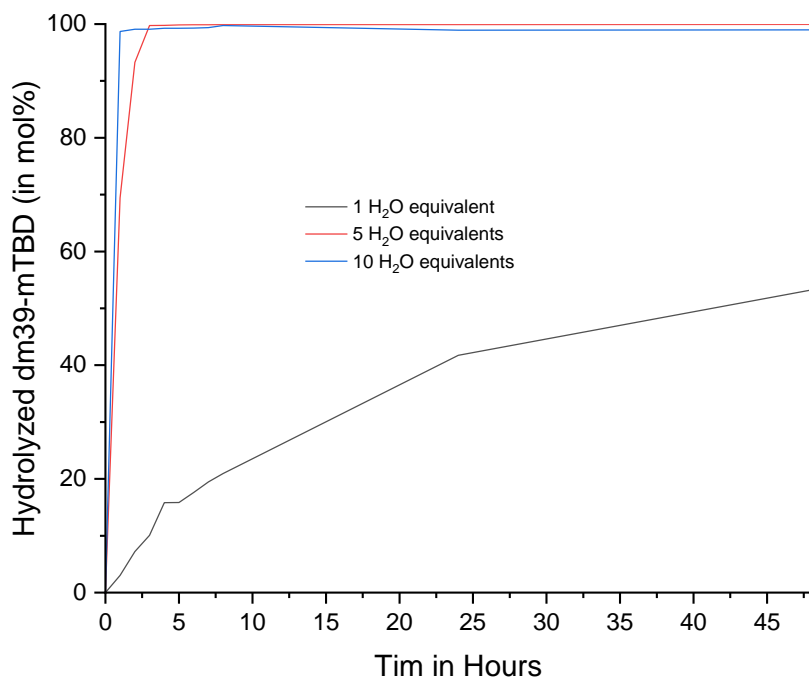

Figure S 139 hydrolysis of dm39-mTBD with different water amounts.

8. dm3-m0-mTBD with different amounts of water

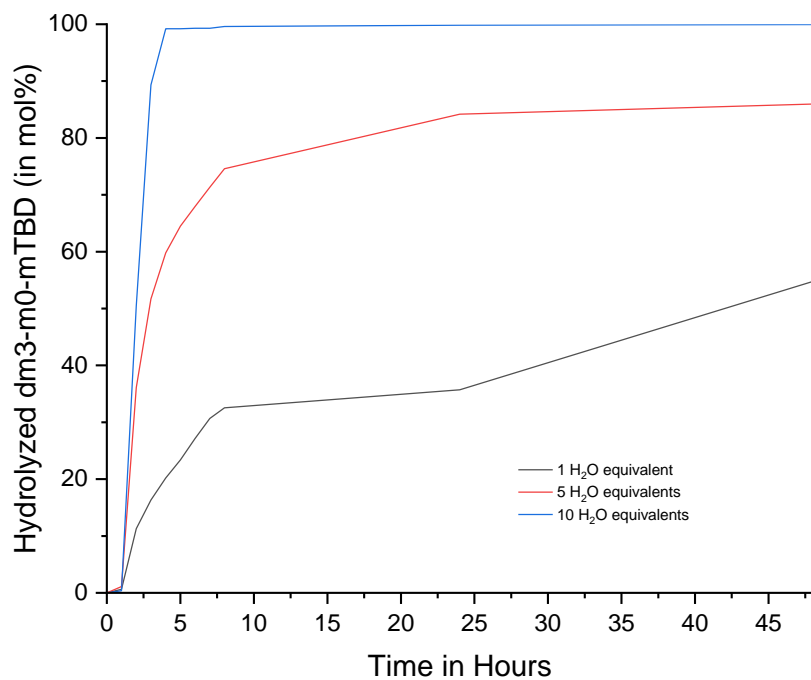

Figure S140 hydrolysis of dm3-m0-mTBD with different water amounts.

9. dm3-mTBD with different amounts of water

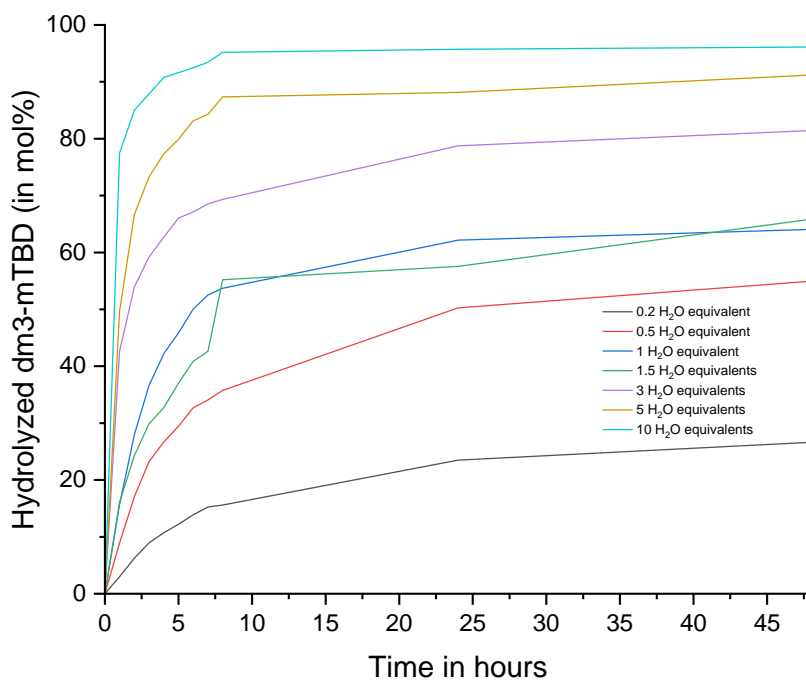

Figure S141 hydrolysis of dm3-mTBD with different water amounts.

10. m2-mTBD with different amounts of water

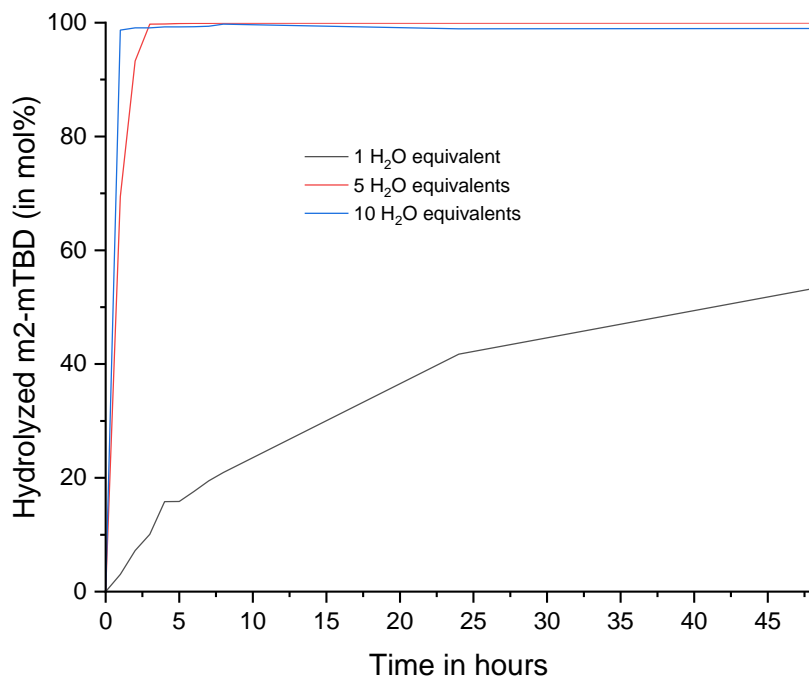

Figure S142 hydrolysis of m2-mTBD with different water amounts.

11. [mTBDH][OAc] with different amounts of water

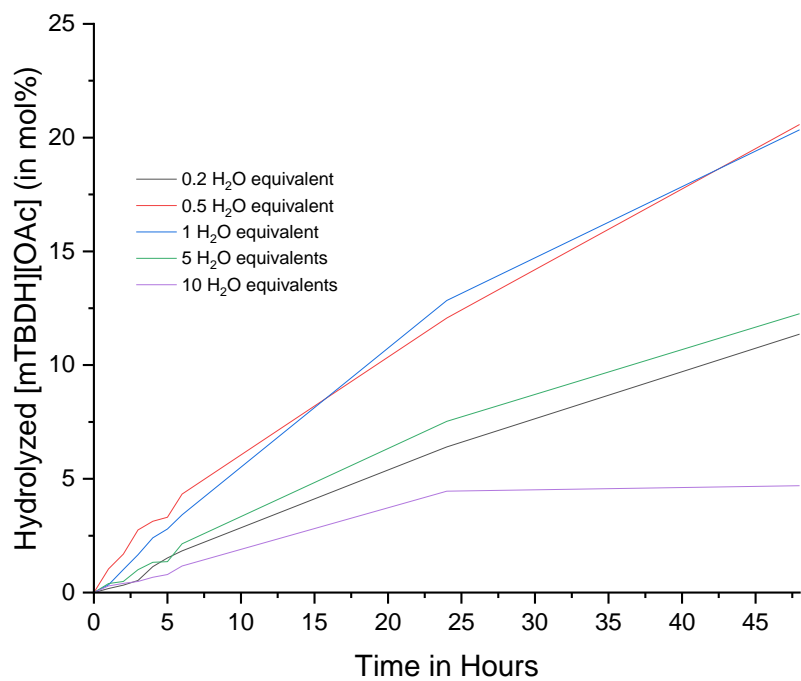

Figure S143 hydrolysis of [mTDBH][OAc] with different water amounts.

12. [mTBDH][OAc] with different amounts of DMSO

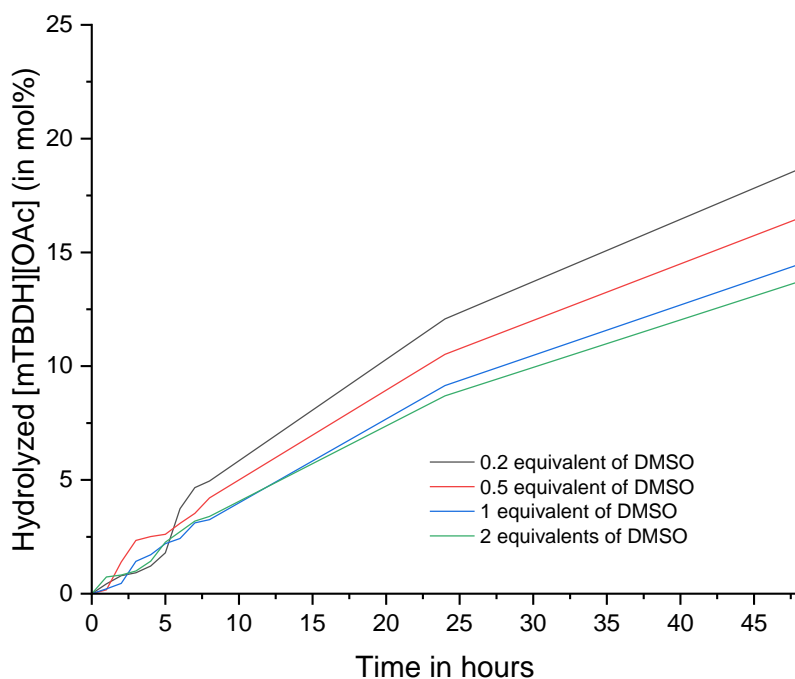

Figure S144 hydrolysis of [mTBDH][OAc] + DMSO with different DMSO amounts.

13. [mTBDH][OAc] with different amounts of Ethylene Glycol

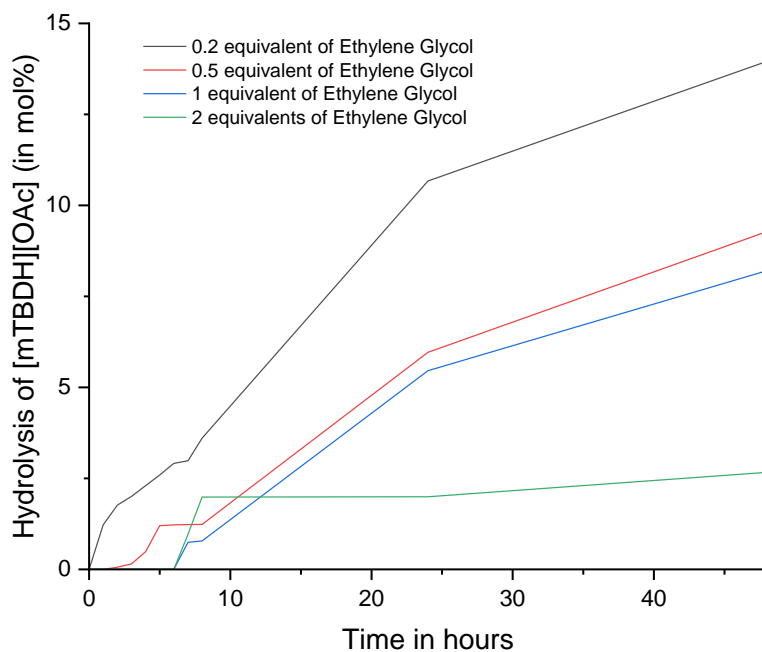

Figure S145 hydrolysis of [mTBDH][OAc] + Ethylene Glycol with different Ethylene Glycol amounts.

14. [mTBDH][OAc] with different amounts of Phenol

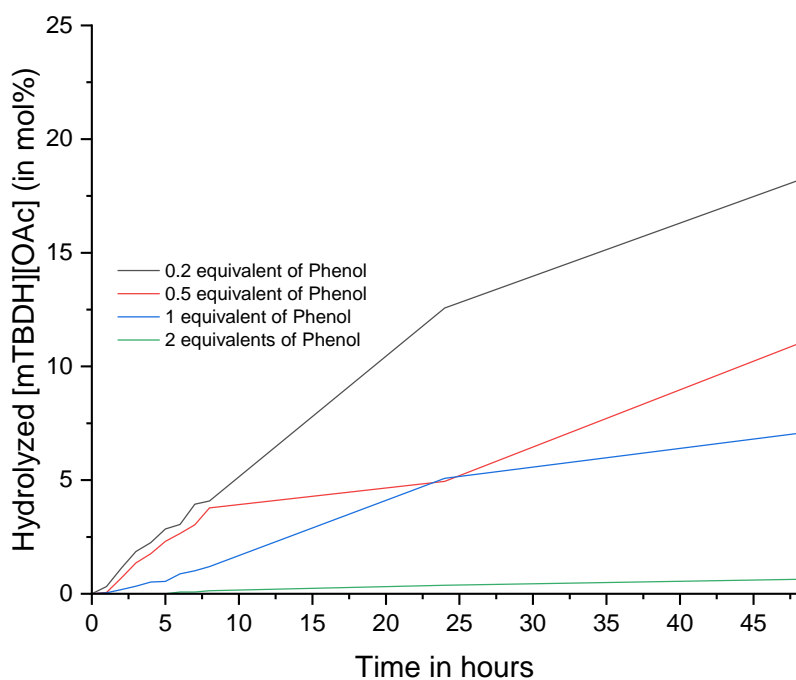

Figure S146 hydrolysis of [mTBDH][OAc] + Phenol with different phenol amounts.

15. [mTBDH][OAc] with different amounts of Propanol

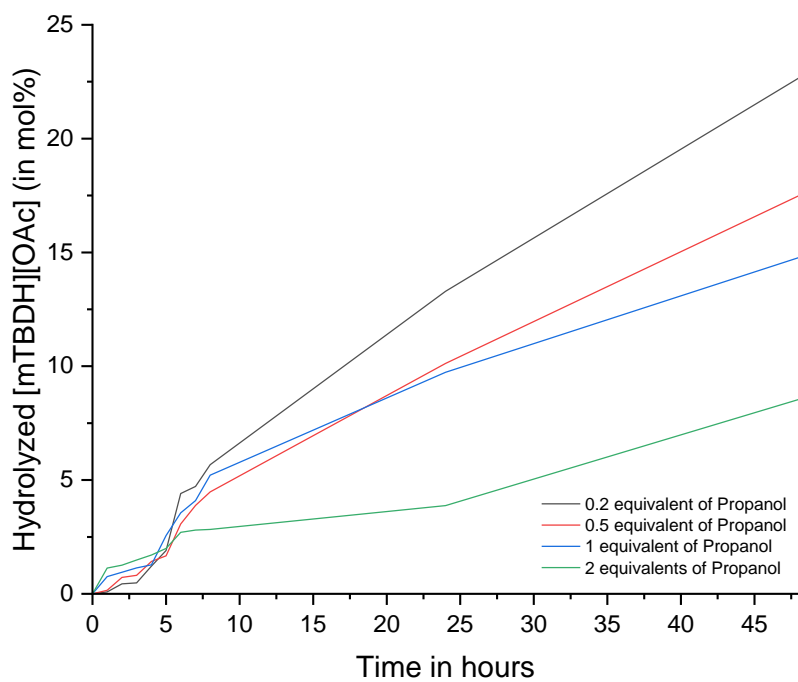

Figure S147 hydrolysis of [mTBDH][OAc] + Propanol with different propanol amount.

16. [mTBNH][OAc] with different amounts of water



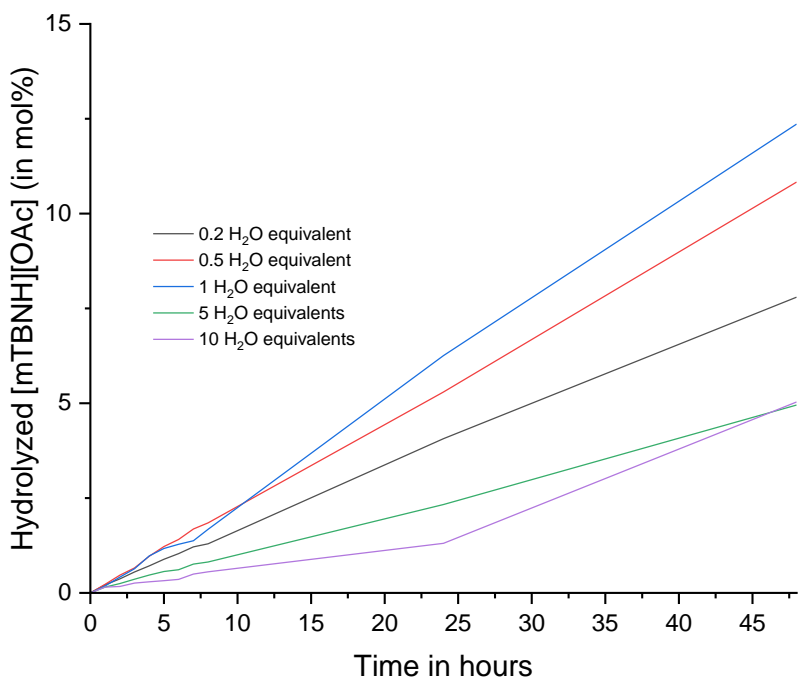

Figure S148 hydrolysis of [mTBNH][OAc] with different water amounts.

17. [dm39-mTBDH][OAc] with different amount of water

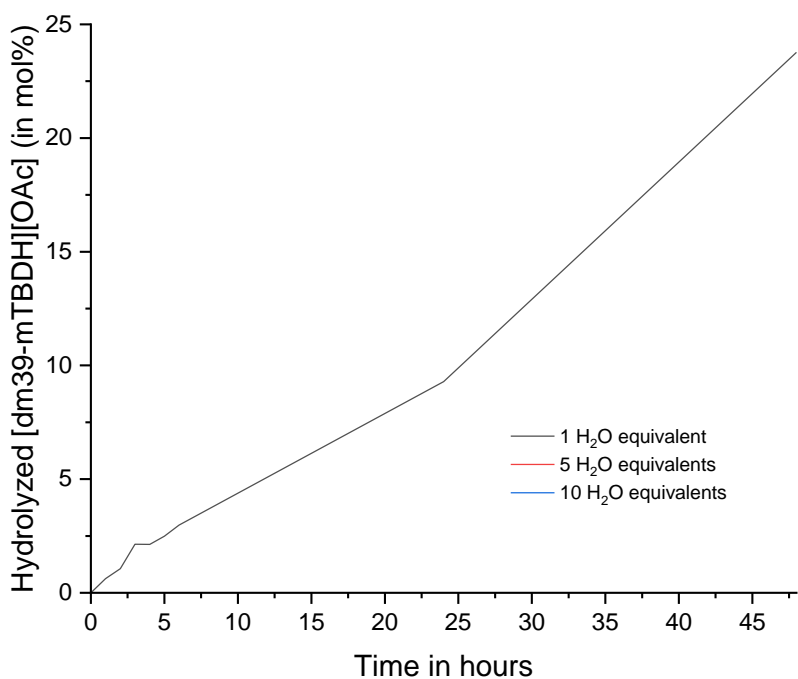

Figure S149 hydrolysis of [dm39-mTBDH][OAc] with different water amounts.

18. [dm3-m0-mTBDH][OAc] with different amount of water

In this specific case. no hydrolysis happens in 48 hours no matter the amount of water used.

19. [dm3-mTBDH][OAc] with different amount of water

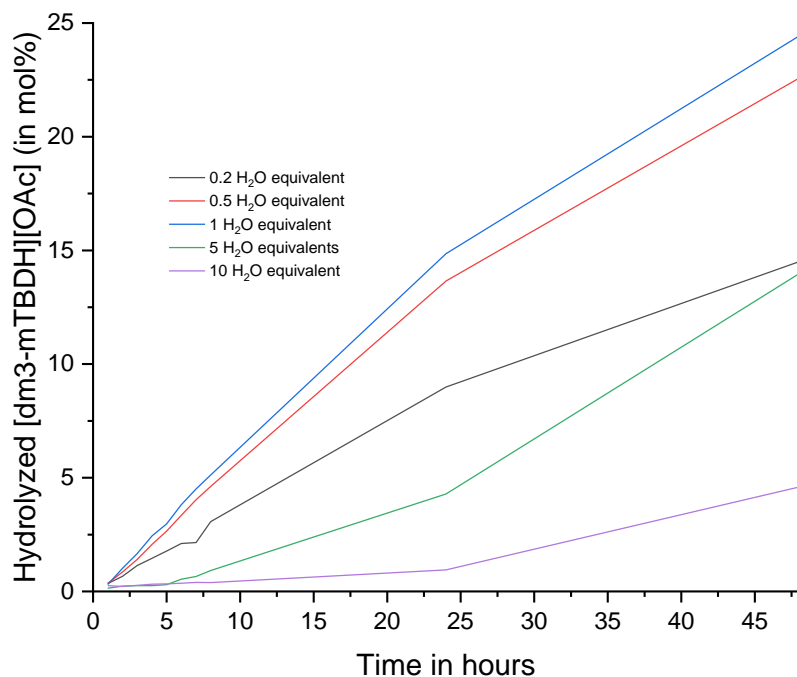

Figure S150 hydrolysis of [dm3-mTBDH][OAc] with different water amounts.

20. [m2-mTBDH][OAc] with different amount of water

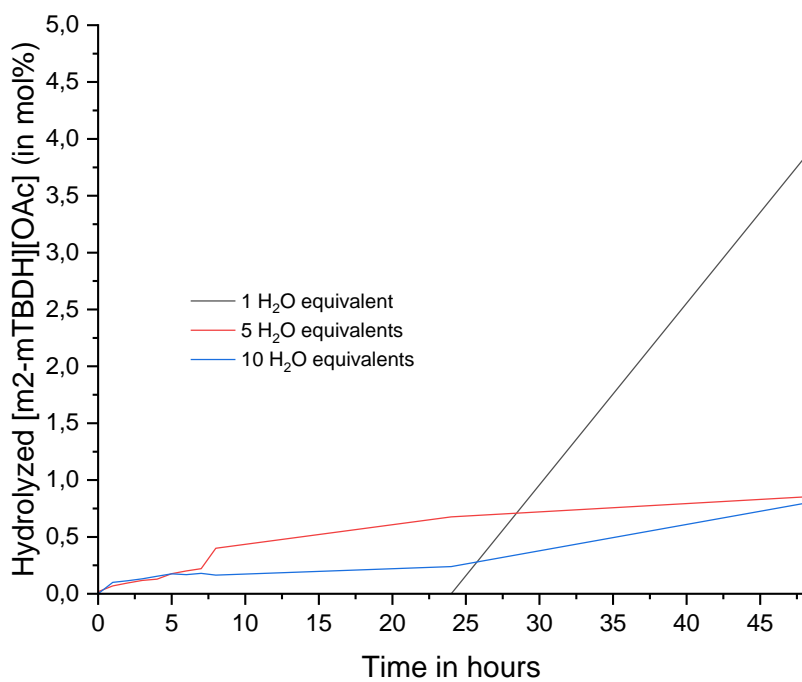

Figure S151 hydrolysis of [m2-mTBDH][OAc] with different water amounts.

#### IV. Conductivity.

To follow the evolution of the hydroxyl salt formation of a superbase in water, we performed a conductivity experiment by titrating the superbase with water. Simultaneously, at each water equivalents and after waiting until the conductivity value was stable. we performed a FTIR measurement.

##### 1. General procedure:

First the conductivity of the pure water was measured, then the pure superbase. After that, in a falcon tube was loaded 15ml of a given superbase (mTBD, mTBN, mTBO or dm3-mTBD) with a small stirring magnet. Then the conductivity probe was immersed (pay attention to fully submerge the “reading window” of the probe). The water amounts were added using a calibrated mechanical pipette. N.B! the conductivity may take few minutes before stabilizing.

##### 2. Curves and raw data.

###### a. *Water titration of mTBD*

After plotting the conductivity data, we could observe some turning points on the conductivity curves. We used a tangent tool to get an estimation of the precise location of these points. Note that variations may occur from one experiment to another due to the instrument used, the ambient temperature / moisture or the “stabilization” time used to collect the conductivity data. For clarity, in the following section a picture of the entire conductivity curve is shown followed by zooms on the turning points area.

| Water amount (molar equivalent according to Superbase) | Conductivity (µs/cm) | Water amount (molar equivalent according to Superbase) | Conductivity (µs/cm) | Water amount (molar equivalent according to Superbase) | Conductivity (µs/cm) | Water amount (molar equivalent according to Superbase) | Conductivity (µs/cm) |
|--------------------------------------------------------|----------------------|--------------------------------------------------------|----------------------|--------------------------------------------------------|----------------------|--------------------------------------------------------|----------------------|
| <b>0</b>                                               | 1.1                  | <b>1.7</b>                                             | 35.4                 | <b>5.2</b>                                             | 4220                 | <b>28</b>                                              | 105700               |
| <b>1</b>                                               | 2.3                  | <b>1.8</b>                                             | 43.9                 | <b>5.3</b>                                             | 4280                 | <b>30</b>                                              | 107000               |
| <b>0.1</b>                                             | 1.88                 | <b>1.9</b>                                             | 54.1                 | <b>5.4</b>                                             | 4570                 | <b>32</b>                                              | 107000               |
| <b>0.2</b>                                             | 2.92                 | <b>2</b>                                               | 65.7                 | <b>5.5</b>                                             | 4920                 | <b>34</b>                                              | 105700               |
| <b>0.3</b>                                             | 4.35                 | <b>2.5</b>                                             | 191.6                | <b>5.6</b>                                             | 5270                 | <b>36</b>                                              | 105000               |
| <b>0.4</b>                                             | 5.8                  | <b>2.75</b>                                            | 257                  | <b>5.8</b>                                             | 6070                 | <b>38</b>                                              | 103600               |
| <b>0.5</b>                                             | 7.06                 | <b>2.85</b>                                            | 304                  | <b>6</b>                                               | 6820                 | <b>40</b>                                              | 102300               |
| <b>0.6</b>                                             | 8.84                 | <b>3</b>                                               | 361                  | <b>7</b>                                               | 12010                |                                                        |                      |
| <b>0.7</b>                                             | 10.44                | <b>3.25</b>                                            | 560                  | <b>8</b>                                               | 17730                |                                                        |                      |
| <b>0.8</b>                                             | 11.54                | <b>3.5</b>                                             | 785                  | <b>10</b>                                              | 32700                |                                                        |                      |
| <b>0.9</b>                                             | 12.69                | <b>3.75</b>                                            | 1008                 | <b>12</b>                                              | 47200                |                                                        |                      |
| <b>1</b>                                               | 13.9                 | <b>4</b>                                               | 1426                 | <b>14</b>                                              | 60200                |                                                        |                      |
| <b>1.1</b>                                             | 15.15                | <b>4.25</b>                                            | 1904                 | <b>16</b>                                              | 71700                |                                                        |                      |
| <b>1.2</b>                                             | 16.6                 | <b>4.35</b>                                            | 2100                 | <b>18</b>                                              | 84000                |                                                        |                      |

|            |       |             |      |           |        |  |  |
|------------|-------|-------------|------|-----------|--------|--|--|
| <b>1.3</b> | 17.96 | <b>4.45</b> | 2280 | <b>20</b> | 90700  |  |  |
| <b>1.4</b> | 20.8  | <b>4.7</b>  | 2970 | <b>22</b> | 95000  |  |  |
| <b>1.5</b> | 24.7  | <b>5</b>    | 3780 | <b>24</b> | 99600  |  |  |
| <b>1.6</b> | 29.7  | <b>5.1</b>  | 4030 | <b>26</b> | 104000 |  |  |

Table S137 Conductivity of mTBD in water.

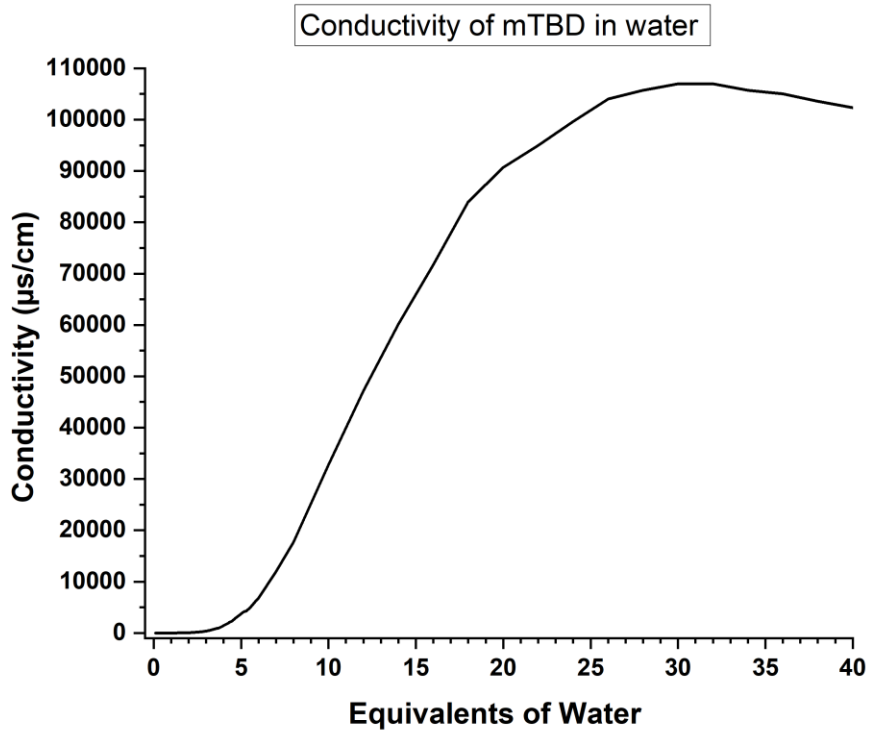

Figure S152 Conductivity data of mTBD in water.

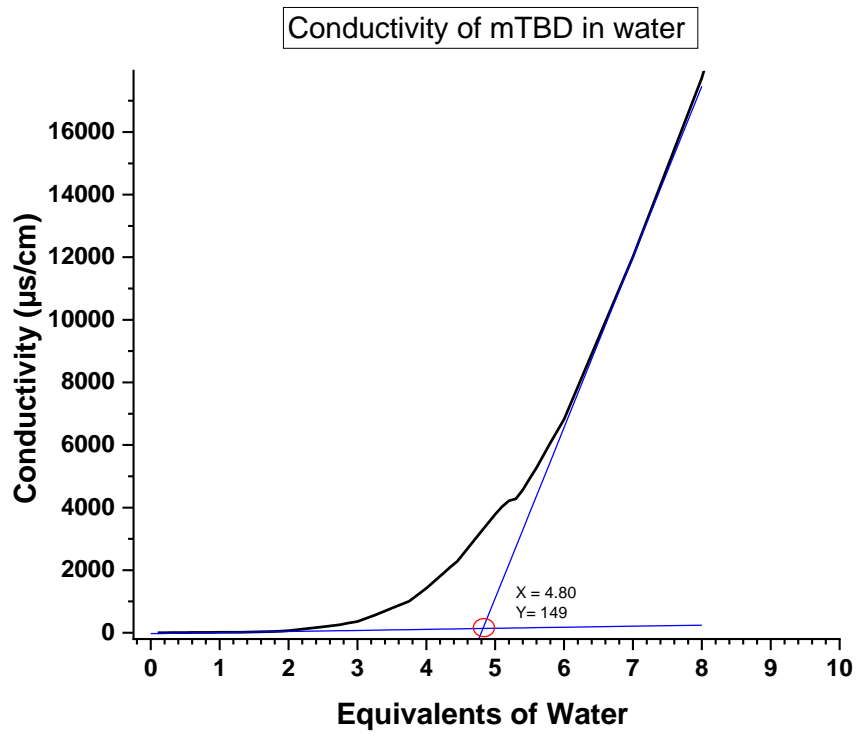

Figure S153 Conductivity data of mTBD in water.

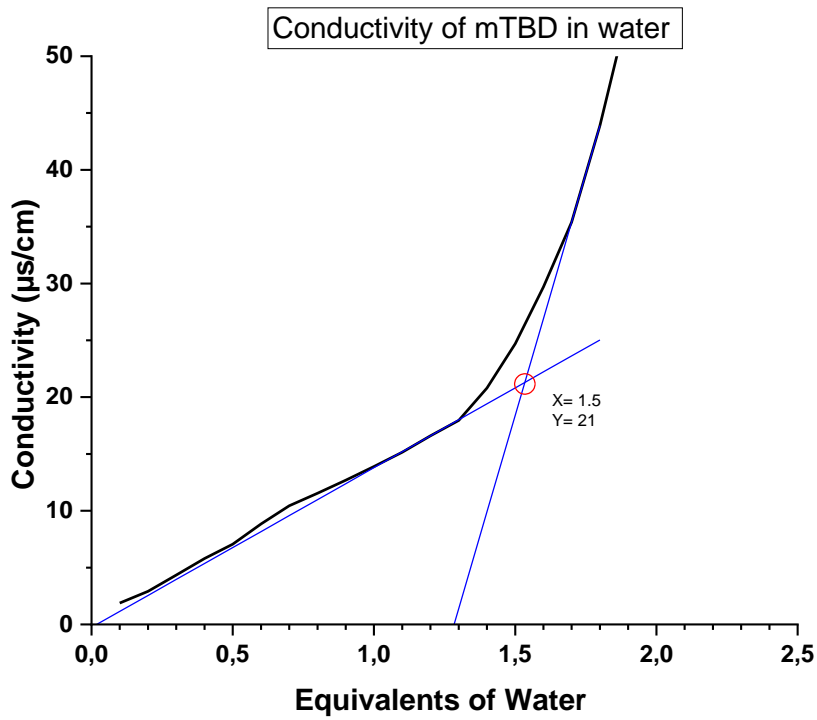

Figure S 154 Conductivity data of mTBD in water

b. water titration of mTBN

| Water amount<br>(molar equivalent<br>according to<br>Superbase) | Conductivity<br>( $\mu\text{s}/\text{cm}$ ) | Water amount<br>(molar equivalent<br>according to<br>Superbase) | Conductivity<br>( $\mu\text{s}/\text{cm}$ ) | Water amount<br>(molar equivalent<br>according to<br>Superbase) | Conductivity<br>( $\mu\text{s}/\text{cm}$ ) |
|-----------------------------------------------------------------|---------------------------------------------|-----------------------------------------------------------------|---------------------------------------------|-----------------------------------------------------------------|---------------------------------------------|
| <b>0</b>                                                        | 3.16                                        | <b>5.2</b>                                                      | 713                                         | <b>66</b>                                                       | 31400                                       |
| <b>1</b>                                                        | 4.27                                        | <b>5.3</b>                                                      | 768                                         | <b>68</b>                                                       | 31300                                       |
| <b>0.1</b>                                                      | 5.88                                        | <b>5.5</b>                                                      | 823                                         | <b>70</b>                                                       | 31200                                       |
| <b>0.2</b>                                                      | 7.85                                        | <b>5.6</b>                                                      | 877                                         | <b>72</b>                                                       | 31100                                       |
| <b>0.3</b>                                                      | 9.21                                        | <b>5.8</b>                                                      | 935                                         | <b>74</b>                                                       | 31000                                       |
| <b>0.4</b>                                                      | 10.52                                       | <b>6</b>                                                        | 1060                                        | <b>76</b>                                                       | 30800                                       |
| <b>0.5</b>                                                      | 11.43                                       | <b>7</b>                                                        | 1204                                        | <b>78</b>                                                       | 30700                                       |
| <b>0.6</b>                                                      | 12.19                                       | <b>8</b>                                                        | 2110                                        | <b>80</b>                                                       | 30600                                       |
| <b>0.7</b>                                                      | 12.58                                       | <b>10</b>                                                       | 3230                                        | <b>82</b>                                                       | 30500                                       |
| <b>0.8</b>                                                      | 13.05                                       | <b>12</b>                                                       | 5910                                        | <b>84</b>                                                       | 30400                                       |
| <b>0.9</b>                                                      | 13.4                                        | <b>14</b>                                                       | 8820                                        | <b>86</b>                                                       | 30300                                       |
| <b>1</b>                                                        | 13.52                                       | <b>16</b>                                                       | 11730                                       | <b>88</b>                                                       | 30100                                       |
| <b>1.1</b>                                                      | 13.92                                       | <b>18</b>                                                       | 14510                                       | <b>90</b>                                                       | 30000                                       |
| <b>1.2</b>                                                      | 14.2                                        | <b>20</b>                                                       | 16930                                       |                                                                 |                                             |
| <b>1.3</b>                                                      | 14.67                                       | <b>22</b>                                                       | 19100                                       |                                                                 |                                             |
| <b>1.4</b>                                                      | 15.17                                       | <b>24</b>                                                       | 21000                                       |                                                                 |                                             |
| <b>1.5</b>                                                      | 15.54                                       | <b>26</b>                                                       | 22900                                       |                                                                 |                                             |
| <b>1.6</b>                                                      | 16.35                                       | <b>28</b>                                                       | 24500                                       |                                                                 |                                             |
| <b>1.7</b>                                                      | 17.24                                       | <b>30</b>                                                       | 25700                                       |                                                                 |                                             |
| <b>1.8</b>                                                      | 18.66                                       | <b>32</b>                                                       | 26800                                       |                                                                 |                                             |
| <b>1.9</b>                                                      | 20.1                                        | <b>34</b>                                                       | 27800                                       |                                                                 |                                             |
| <b>2</b>                                                        | 22                                          | <b>36</b>                                                       | 28500                                       |                                                                 |                                             |
| <b>2.5</b>                                                      | 41.7                                        | <b>38</b>                                                       | 29200                                       |                                                                 |                                             |
| <b>2.75</b>                                                     | 57.9                                        | <b>40</b>                                                       | 29700                                       |                                                                 |                                             |
| <b>2.85</b>                                                     | 65.5                                        | <b>42</b>                                                       | 30200                                       |                                                                 |                                             |
| <b>3</b>                                                        | 89.4                                        | <b>44</b>                                                       | 30600                                       |                                                                 |                                             |
| <b>3.25</b>                                                     | 121.7                                       | <b>46</b>                                                       | 30800                                       |                                                                 |                                             |
| <b>3.5</b>                                                      | 162.3                                       | <b>48</b>                                                       | 31100                                       |                                                                 |                                             |
| <b>3.75</b>                                                     | 211                                         | <b>50</b>                                                       | 31300                                       |                                                                 |                                             |
| <b>4</b>                                                        | 272                                         | <b>52</b>                                                       | 31400                                       |                                                                 |                                             |
| <b>4.25</b>                                                     | 343                                         | <b>54</b>                                                       | 31500                                       |                                                                 |                                             |
| <b>4.35</b>                                                     | 362                                         | <b>56</b>                                                       | 31600                                       |                                                                 |                                             |
| <b>4.45</b>                                                     | 393                                         | <b>58</b>                                                       | 31600                                       |                                                                 |                                             |
| <b>4.7</b>                                                      | 488                                         | <b>60</b>                                                       | 31600                                       |                                                                 |                                             |
| <b>5</b>                                                        | 624                                         | <b>62</b>                                                       | 31500                                       |                                                                 |                                             |
| <b>5.1</b>                                                      | 668                                         | <b>64</b>                                                       | 31500                                       |                                                                 |                                             |
| <b>5.2</b>                                                      | 713                                         | <b>66</b>                                                       | 31400                                       |                                                                 |                                             |

Table S138 Conductivity of mTBN in water

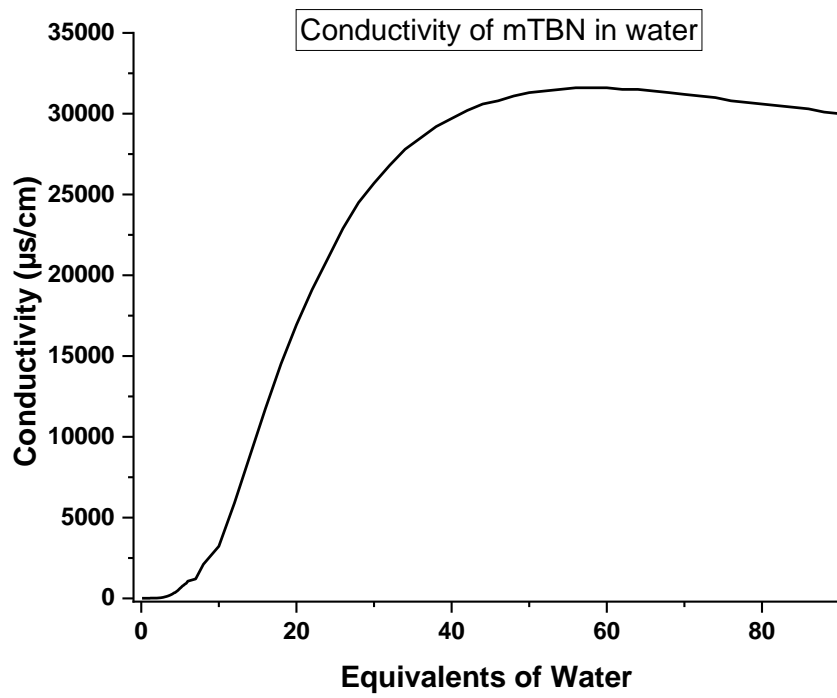

Figure S155 Conductivity data of mTBN in water.

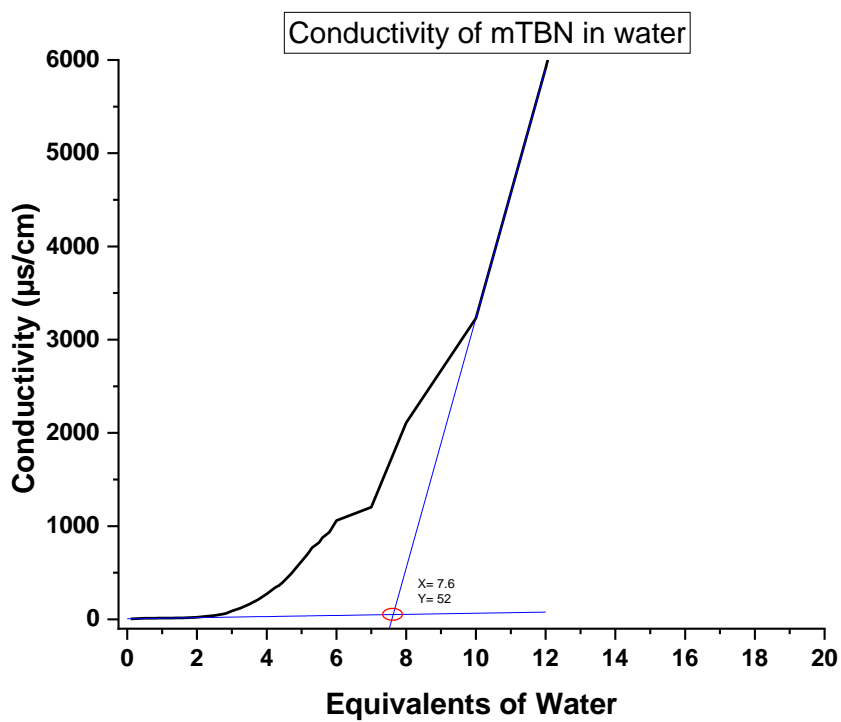

Figure S156 Conductivity data of mTBN in water.

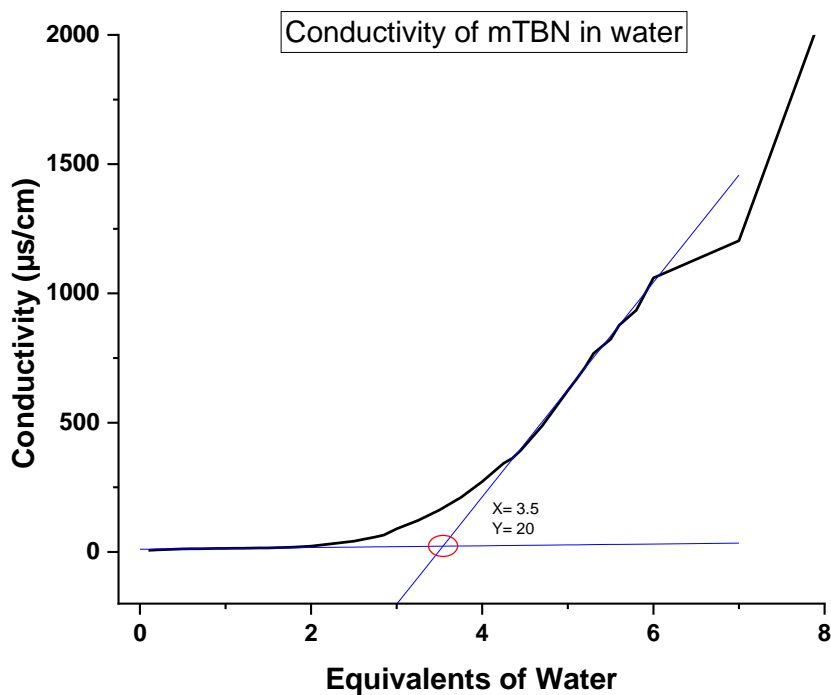

Figure S157 Conductivity data of mTBN in water.

c. Water titration of dm3-mTBD

| Water amount (molar equivalent according to Superbase) | Conductivity ( $\mu\text{s/cm}$ ) | Water amount (molar equivalent according to Superbase) | Conductivity ( $\mu\text{s/cm}$ ) | Water amount (molar equivalent according to Superbase) | Conductivity ( $\mu\text{s/cm}$ ) |
|--------------------------------------------------------|-----------------------------------|--------------------------------------------------------|-----------------------------------|--------------------------------------------------------|-----------------------------------|
| 0                                                      | 1.16                              | 3.5                                                    | 644                               | 28                                                     | 88500                             |
| 1                                                      | 2.28                              | 3.75                                                   | 842                               | 30                                                     | 89400                             |
| 0.1                                                    | 1.94                              | 4                                                      | 1082                              | 32                                                     | 88300                             |
| 0.2                                                    | 3.38                              | 4.25                                                   | 1372                              | 34                                                     | 88200                             |
| 0.3                                                    | 5.21                              | 4.35                                                   | 1485                              | 36                                                     | 88770                             |
| 0.4                                                    | 7.4                               | 4.45                                                   | 1606                              | 38                                                     | 87400                             |
| 0.5                                                    | 10.08                             | 4.7                                                    | 2050                              | 40                                                     | 87000                             |
| 0.6                                                    | 13.18                             | 5                                                      | 2650                              | 42                                                     | 86600                             |
| 0.7                                                    | 16.59                             | 5.1                                                    | 2840                              |                                                        |                                   |
| 0.8                                                    | 19.63                             | 5.2                                                    | 3080                              |                                                        |                                   |
| 0.9                                                    | 22.8                              | 5.3                                                    | 3250                              |                                                        |                                   |
| 1                                                      | 25.8                              | 5.4                                                    | 3490                              |                                                        |                                   |



|      |       |     |       |  |  |
|------|-------|-----|-------|--|--|
| 1.1  | 29    | 5.5 | 3710  |  |  |
| 1.2  | 32.9  | 5.6 | 3960  |  |  |
| 1.3  | 36.1  | 5.8 | 4500  |  |  |
| 1.4  | 40    | 6   | 5070  |  |  |
| 1.5  | 44.1  | 7   | 8790  |  |  |
| 1.6  | 49    | 8   | 13100 |  |  |
| 1.7  | 55.3  | 10  | 22900 |  |  |
| 1.8  | 62.2  | 12  | 33200 |  |  |
| 1.9  | 70.9  | 14  | 43000 |  |  |
| 2    | 82.1  | 16  | 52000 |  |  |
| 2.5  | 181.3 | 18  | 62700 |  |  |
| 2.75 | 238   | 20  | 68200 |  |  |
| 2.85 | 273   | 22  | 76200 |  |  |
| 3    | 364   | 24  | 77900 |  |  |
| 3.25 | 477   | 26  | 85000 |  |  |

Table S 139 Conductivity of dm3-mTBD in water.

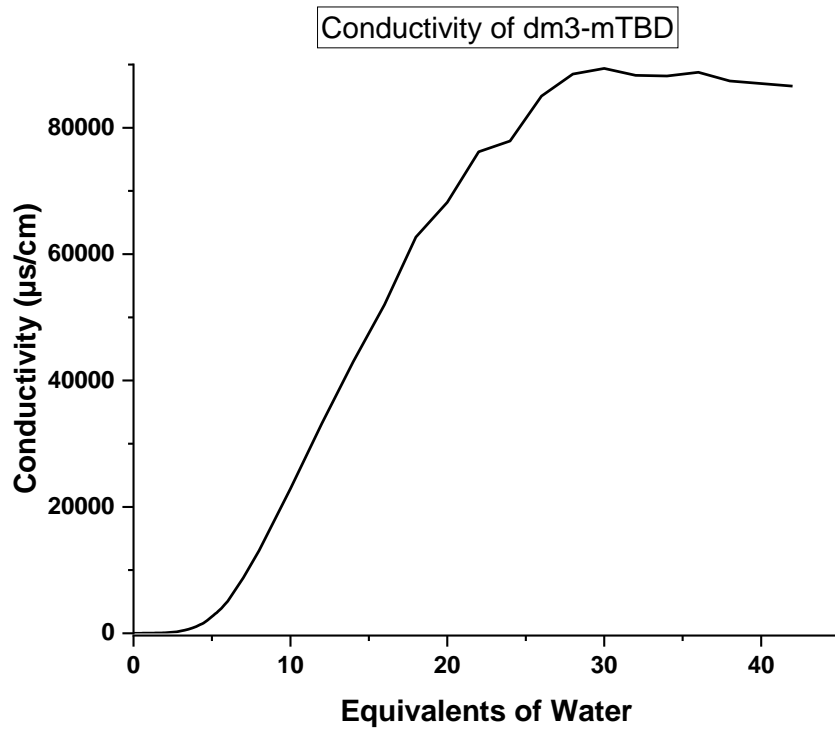

Figure S158 Conductivity data of dm3-mTBD in water.

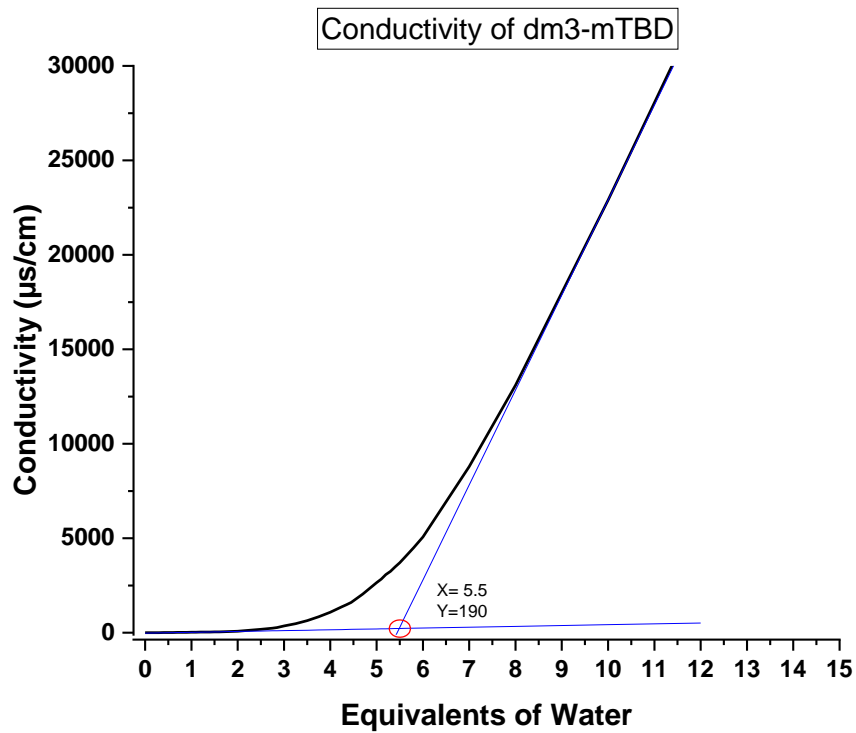

Figure S159 Conductivity data of dm3-mTBD in water.

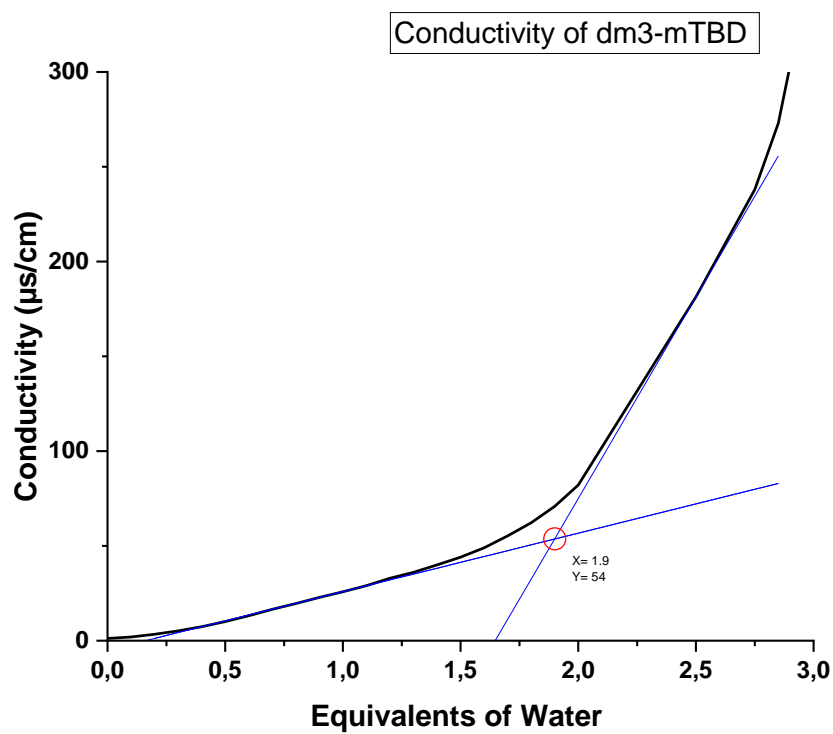

Figure S160 Conductivity data of dm3-mTBD in water.

d. Water titration of mTBO

| Water amount (molar equivalent according to Superbase) | Conductivity ( $\mu\text{S}/\text{cm}$ ) | Water amount (molar equivalent according to Superbase) | Conductivity ( $\mu\text{S}/\text{cm}$ ) |
|--------------------------------------------------------|------------------------------------------|--------------------------------------------------------|------------------------------------------|
| 0                                                      | 2.57                                     | 4.25                                                   | 244                                      |
| 1                                                      | 2.45                                     | 4.35                                                   | 267                                      |
| 0.1                                                    | 3.55                                     | 4.45                                                   | 274                                      |
| 0.2                                                    | 5.4                                      | 4.7                                                    | 291                                      |
| 0.3                                                    | 8.55                                     | 5                                                      | 317                                      |
| 0.4                                                    | 12.97                                    | 5.1                                                    | 345                                      |
| 0.5                                                    | 18.9                                     | 5.2                                                    | 350                                      |
| 0.6                                                    | 35.3                                     | 5.3                                                    | 357                                      |
| 0.7                                                    | 45                                       | 5.4                                                    | 374                                      |
| 0.8                                                    | 51.1                                     | 5.5                                                    | 386                                      |
| 1                                                      | 56.5                                     | 5.6                                                    | 400                                      |
| 1.1                                                    | 65.4                                     | 5.8                                                    | 407                                      |
| 1.2                                                    | 70.6                                     | 6                                                      | 430                                      |
| 1.3                                                    | 75.5                                     | 7                                                      | 433                                      |
| 1.4                                                    | 77                                       | 8                                                      | 581                                      |
| 1.5                                                    | 93.7                                     | 10                                                     | 730                                      |
| 1.6                                                    | 97.5                                     | 12                                                     | 1025                                     |
| 1.7                                                    | 101.5                                    | 14                                                     | 1375                                     |
| 1.8                                                    | 105                                      | 16                                                     | 1446                                     |
| 1.9                                                    | 110.9                                    | 18                                                     | 1616                                     |
| 2                                                      | 118                                      | 20                                                     | 2150                                     |
| 2.5                                                    | 126.8                                    | 22                                                     | 2370                                     |
| 2.75                                                   | 161.5                                    | 24                                                     | 2540                                     |
| 2.85                                                   | 164.8                                    | 26                                                     | 2680                                     |
| 3                                                      | 167.5                                    | 28                                                     | 2800                                     |
| 3.25                                                   | 182.2                                    | 30                                                     | 2880                                     |
| 3.5                                                    | 187.7                                    | 32                                                     | 2940                                     |
| 3.75                                                   | 209                                      | 34                                                     | 3030                                     |
| 4                                                      | 226                                      | 36                                                     | 3060                                     |
| 38                                                     | 3110                                     |                                                        |                                          |

|    |      |
|----|------|
| 40 | 3130 |
| 42 | 3150 |
| 44 | 3150 |
| 46 | 3150 |
| 48 | 3150 |
| 50 | 3150 |
| 52 | 3150 |
| 54 | 3150 |
| 56 | 3150 |
| 58 | 3150 |
| 60 | 3150 |
| 62 | 3130 |
| 64 | 3110 |

Table S140 Conductivity of mTBO in water

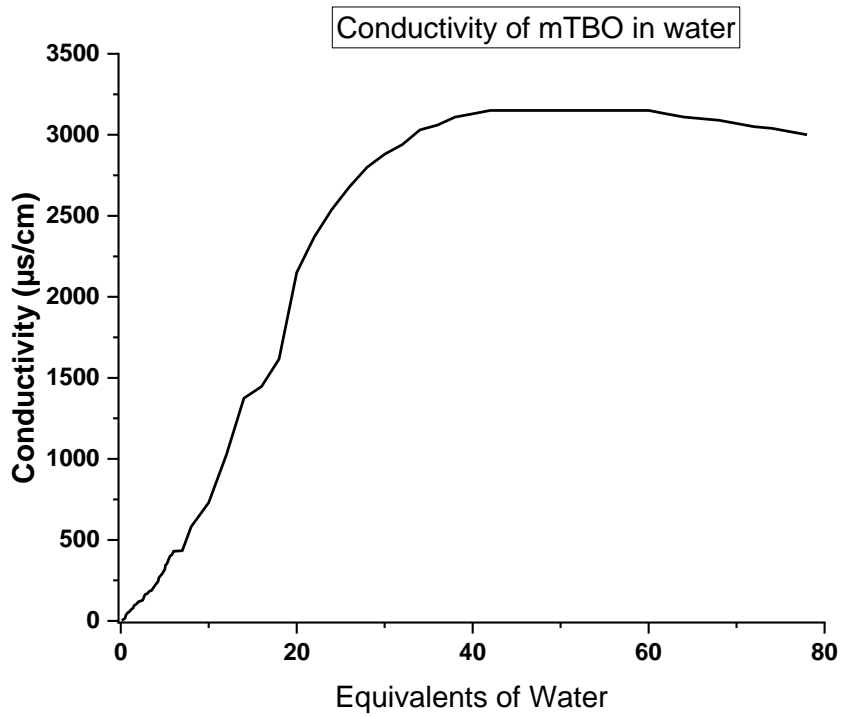

Figure S161 Conductivity data of mTBO in water.

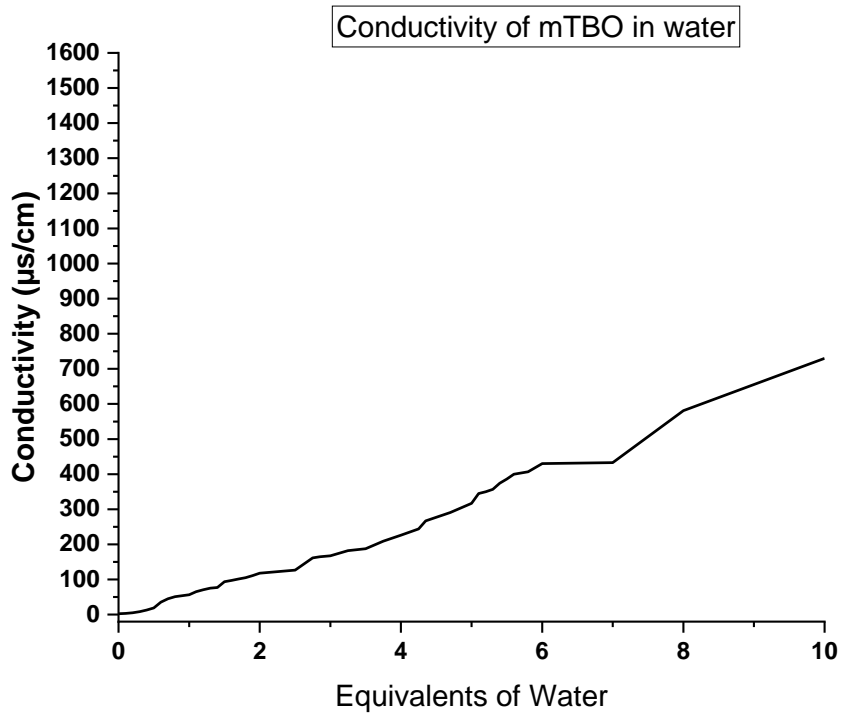

Figure S162 Conductivity data of mTBO in water.

## V. PH measurements

### a. KOH or mTBD in pure distilled water

A pH meter was used to follow the pH of a 100ml distilled water to which a solution of KOH or mTBD (0.1 M, 10 mL 0.056 or 0.15g respectively) was gradually added.

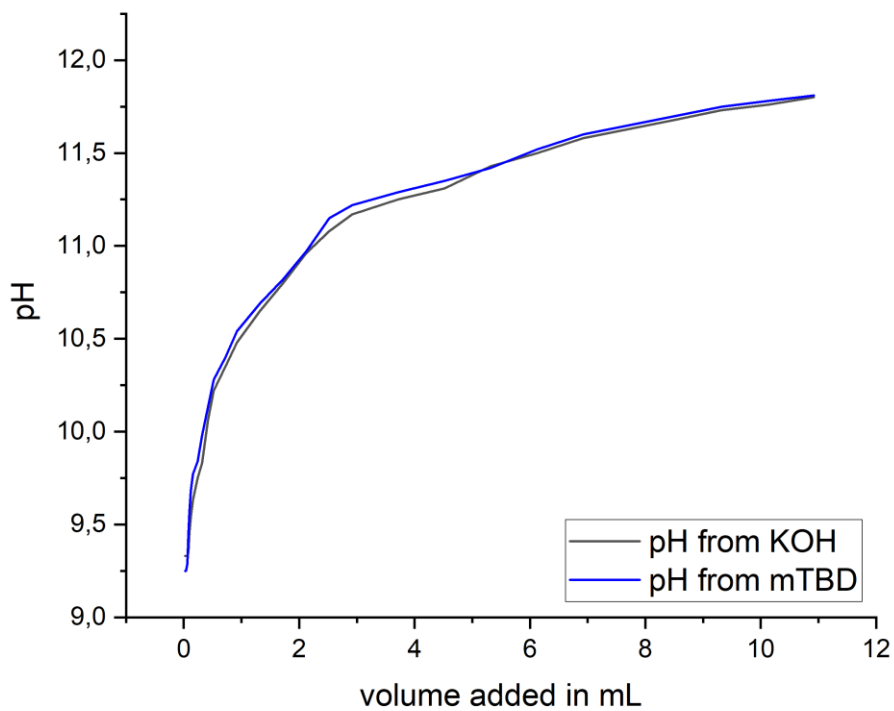

Figure S163 pH evolution of pure water in function of the addition of KOH or mTBD.

b. KOH or mTBD in distilled water with acetic acid

A pH meter was used to follow the pH of a 100ml distilled water with a 0.1 M concentration of acetic acid (0.3 g of acetic acid) to which a solution of KOH or mTBD (0.1 M, 10 mL 0.056 or 0.15g respectively) was gradually added.

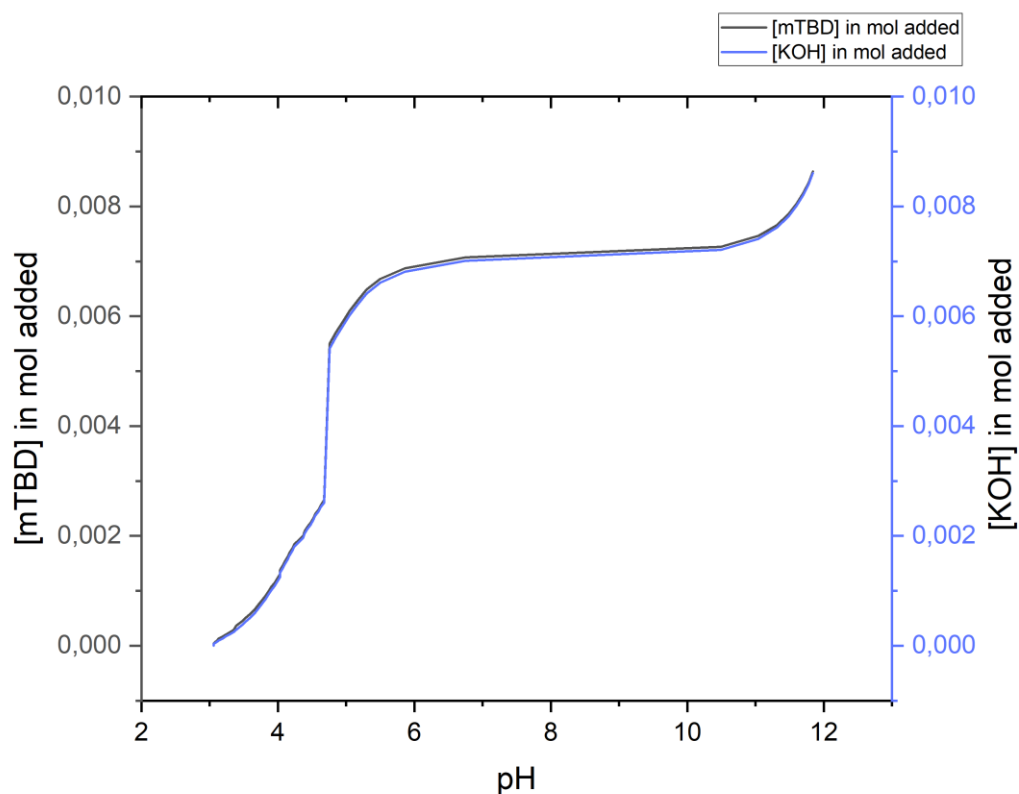

Figure S164 pH evolution of an acidic solution in function of the addition of KOH or mTBD.

c. pH of KOAc and [mTBDH][OAc] solutions

10 mL solution of 0.5 M, 1 M, 2M, 3M, 5 M and 10 M of KOAc or [mTBDH][OAc] were prepared, and their pH was measured with a pH meter.

| Molar concentration | pH value |              |
|---------------------|----------|--------------|
|                     | KOAc     | [mTBDH][OAc] |
| 0.5                 | 7.7      | 6.88         |
| 1                   | 7.92     | 7.0          |
| 2                   | 8.21     | 8.13         |
| 3                   | 8.66     | 8.5          |
| 5                   | 9.46     | 10.71        |
| 10                  | 10.90    | 12.3         |

Table S141 pH evolution of a solution of KOAc or [mTBDH][OAc] in function of their concentration.

## VI. InfraRed measurements

The measurements were performed using an FTIR instrument. As previously mentioned, the sample measured by IR spectroscopy is the same sample where the conductivity was measured. In the following section, for each experiment, a figure of all the spectra combined are shown. followed by an expansion of the CH<sub>2</sub> region (2800 – 3000 cm<sup>-1</sup>) and the imine region (1400-1600cm<sup>-1</sup>). The raw data are available upon request.

1. FTIR measurements of water titration

a. *mTBD*

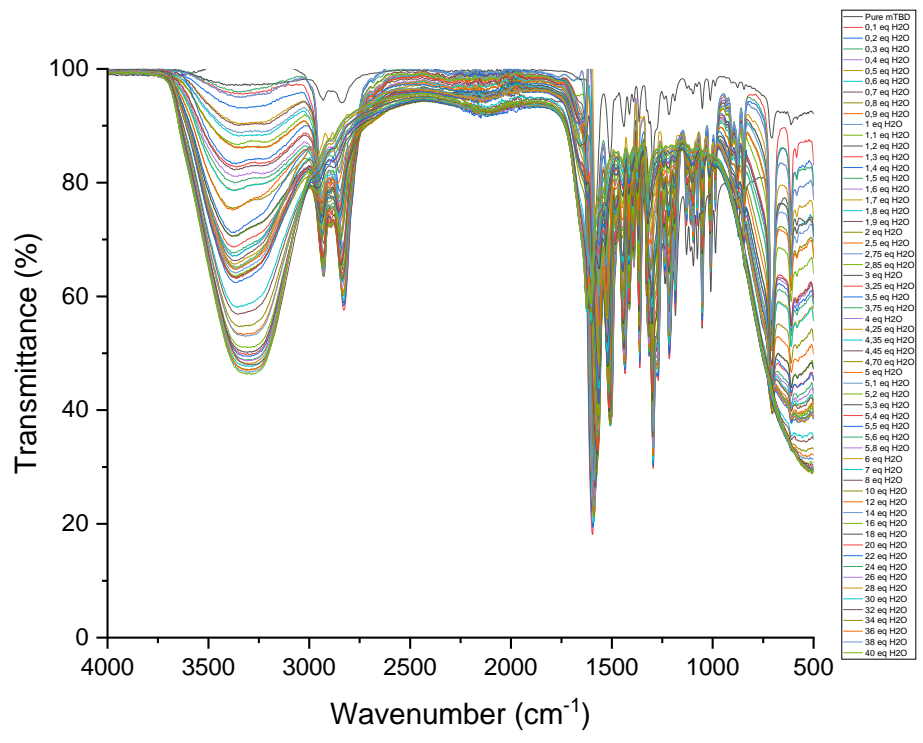

Figure S165 IR of water titration of mTBD.

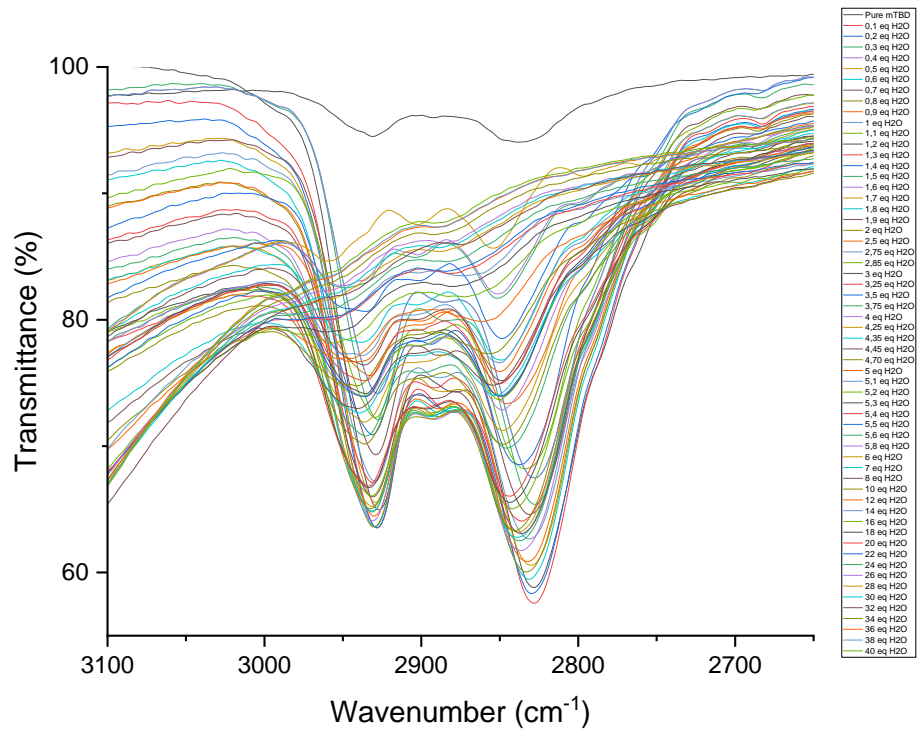

Figure S166 expansion of the mTBD CH<sub>2</sub> region (2800 – 3000 cm<sup>-1</sup>)



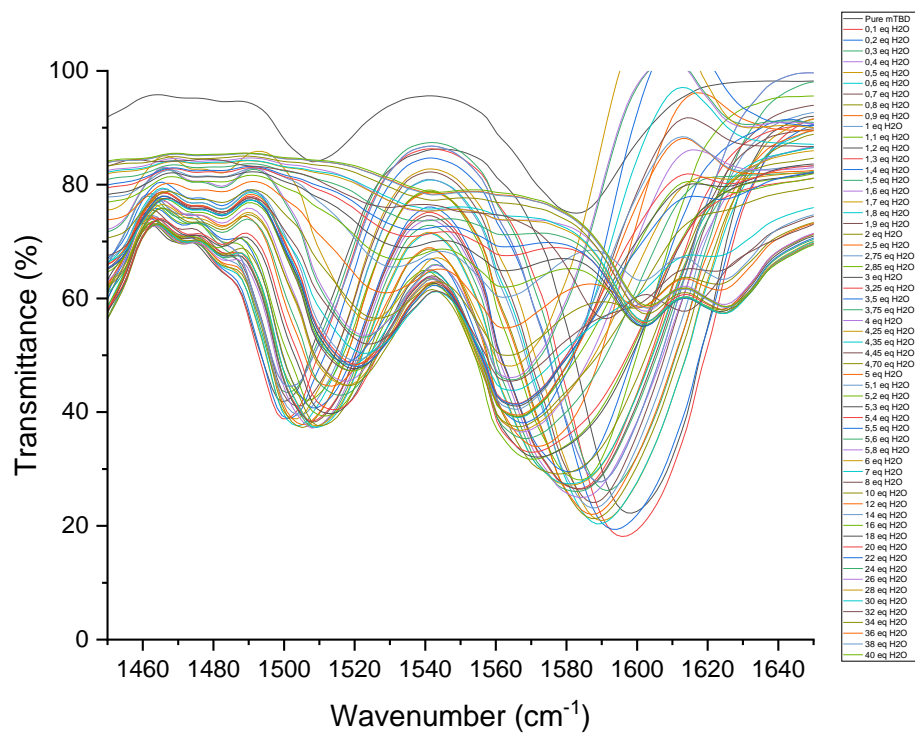

Figure S167 expansion of the mTBD imine region (1400 – 1600  $\text{cm}^{-1}$ )

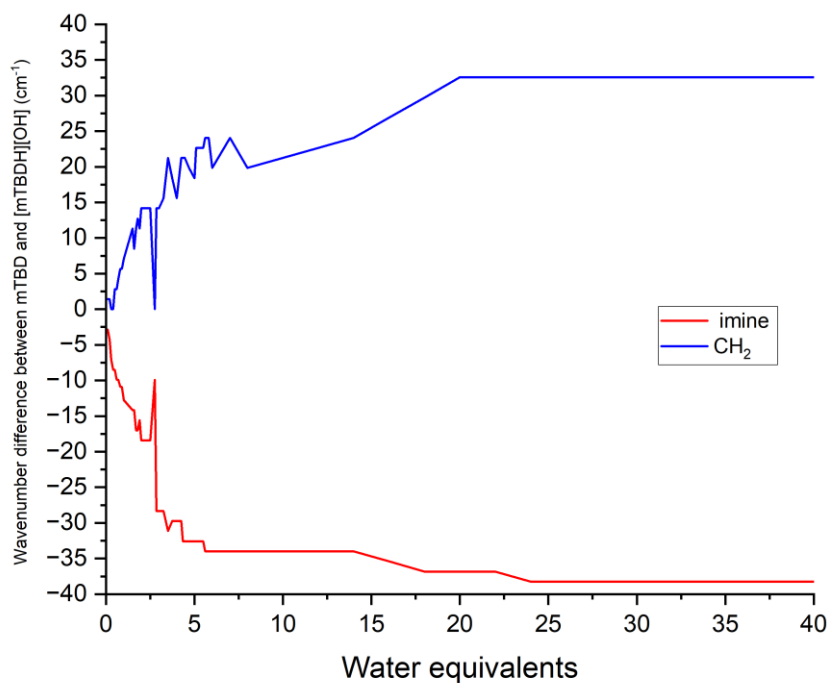

Figure S 168 IR shift of the imine and  $\text{CH}_2$  IR signal of mTBD in function of the water equivalents.

b. *m*TBN

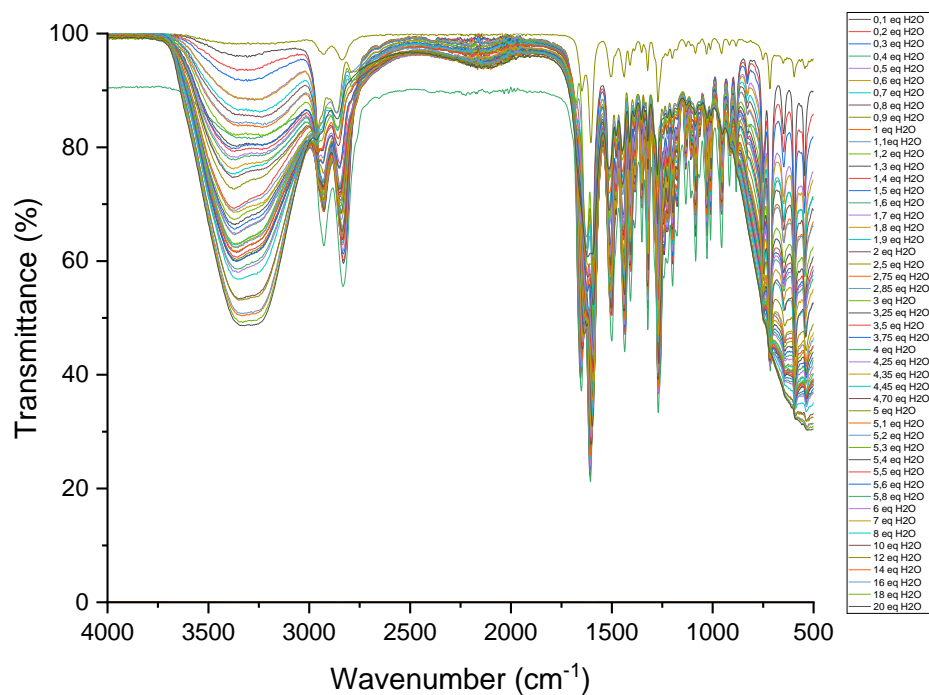

Figure S169 IR of water titration of *m*TBN.

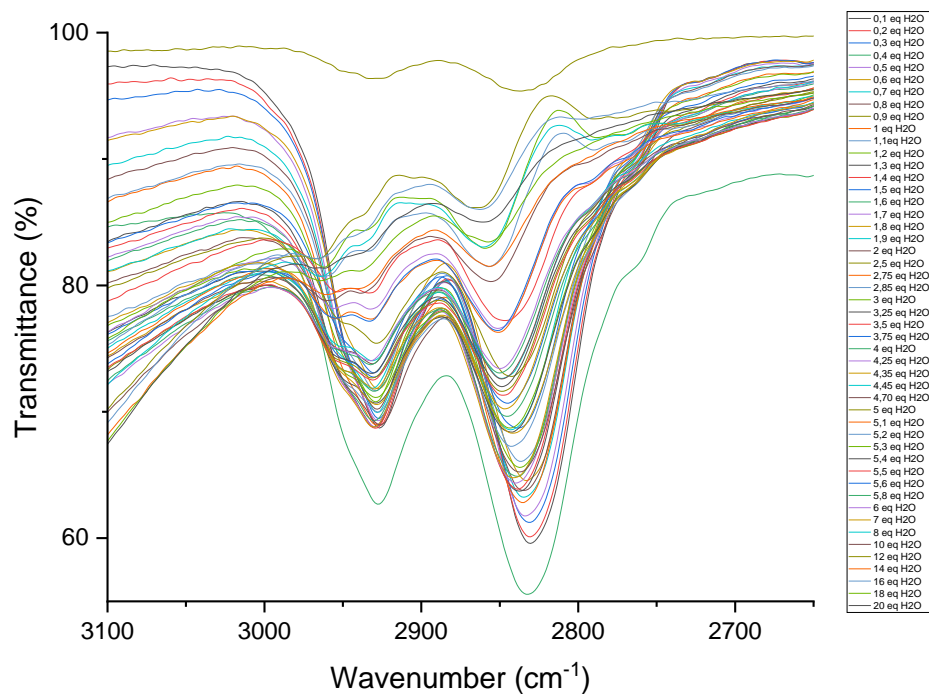

Figure S 170 expansion of the *m*TBN  $\text{CH}_2$  region (2800 – 3000  $\text{cm}^{-1}$ )

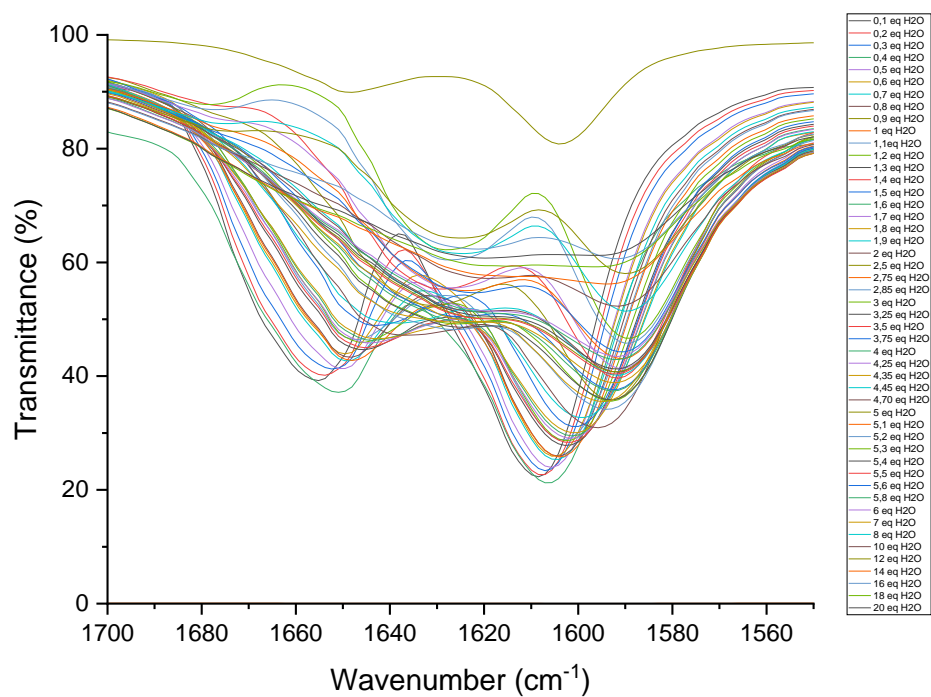

Figure S171 expansion of the mTBN imine region (1400 – 1600 cm<sup>-1</sup>)

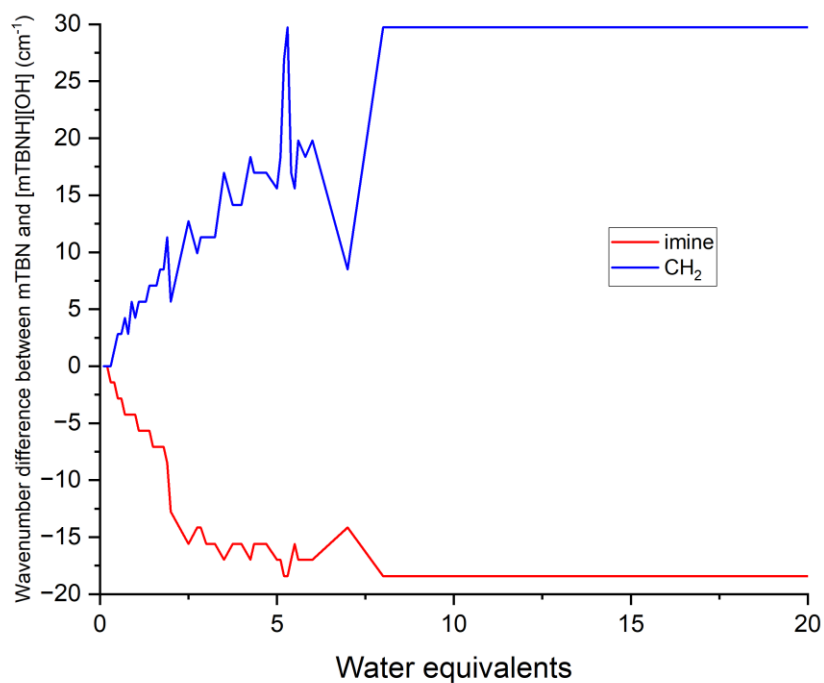

Figure S 172 IR shift of the imine and CH<sub>2</sub> IR signal of mTBN in function of the water equivalents.

c. *dm3-mTBD*

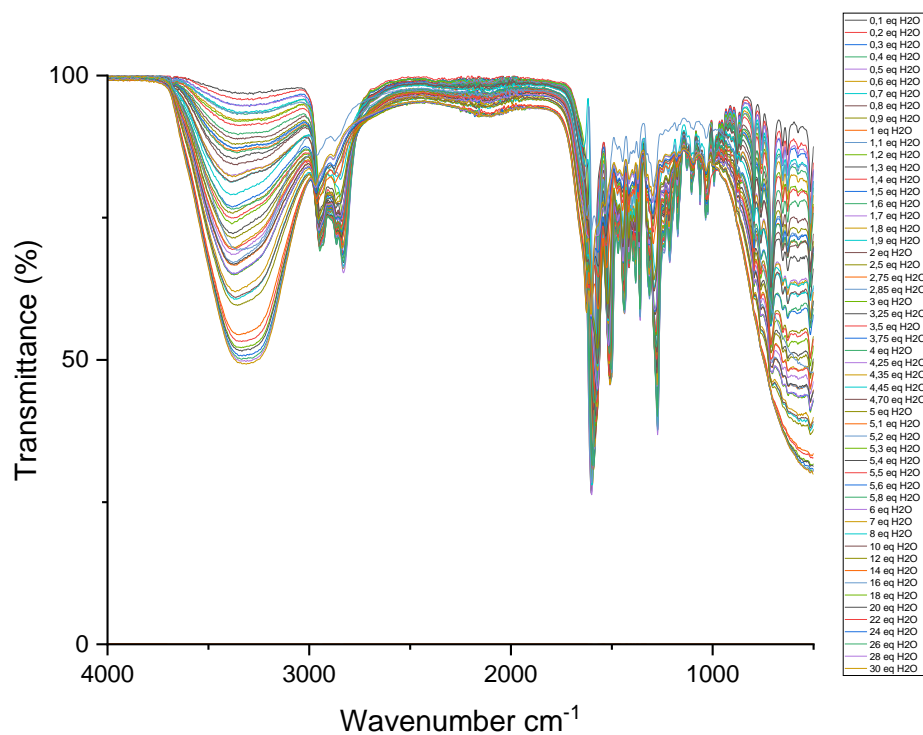

Figure S173 IR of water titration of *dm3-mTBD*.

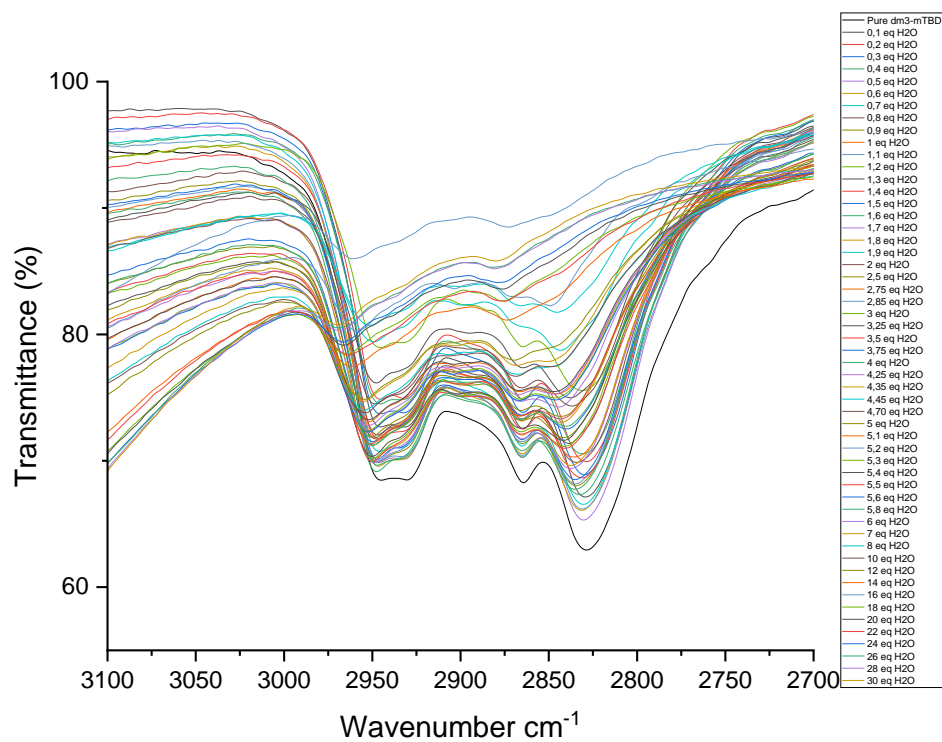

Figure S174 expansion of the *dm3-mTBD* CH<sub>2</sub> region (2800 – 3000 cm<sup>-1</sup>)

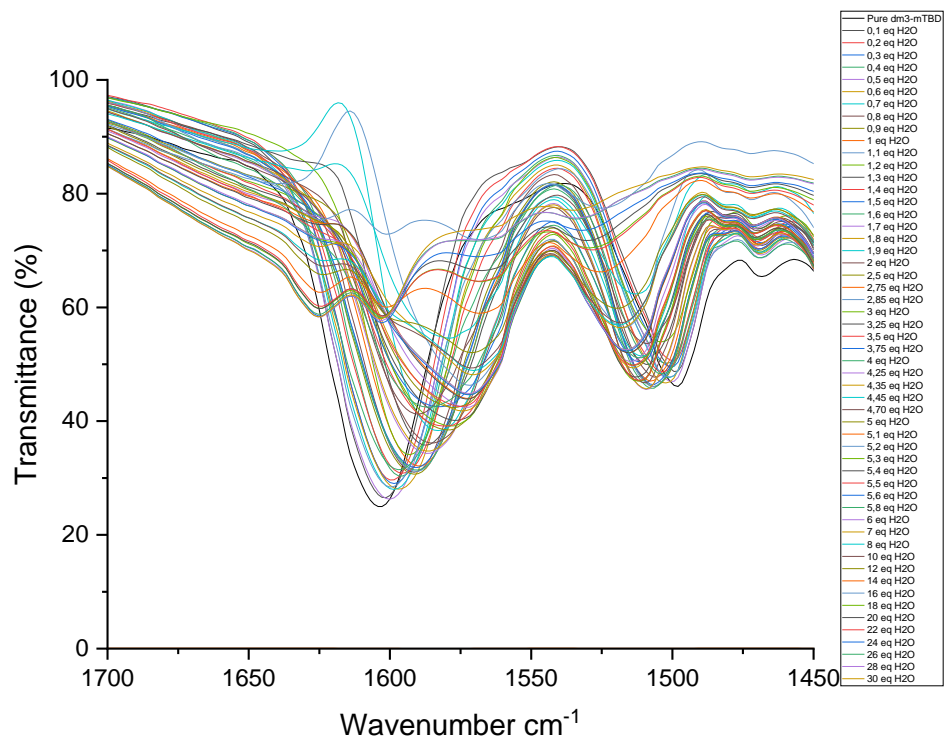

Figure S175 expansion of the dm3-mTBD imine region (1400 – 1600  $\text{cm}^{-1}$ )

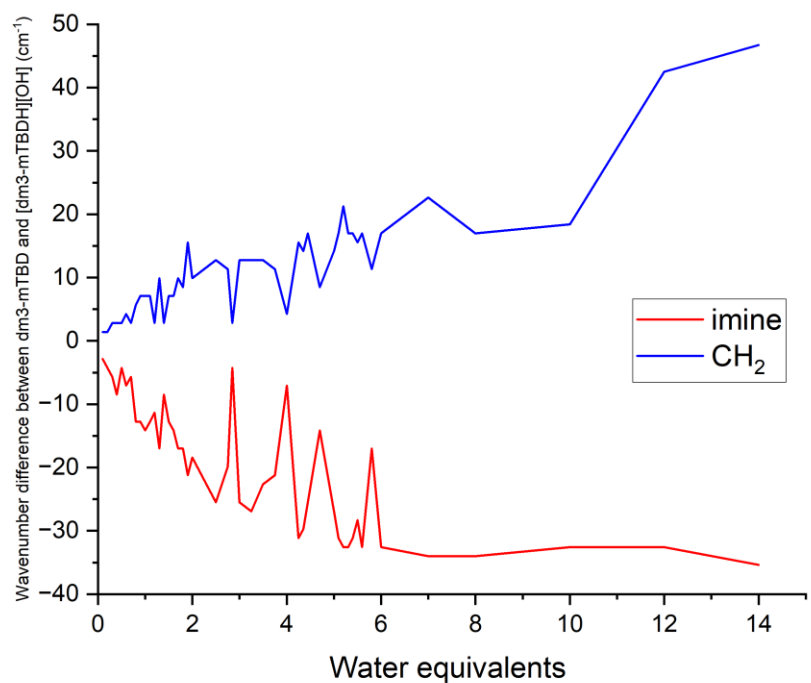

Figure S 176 IR shift of the imine and  $\text{CH}_2$  IR signal of dm3-mTBD in function of the water equivalents.

d. mTBO

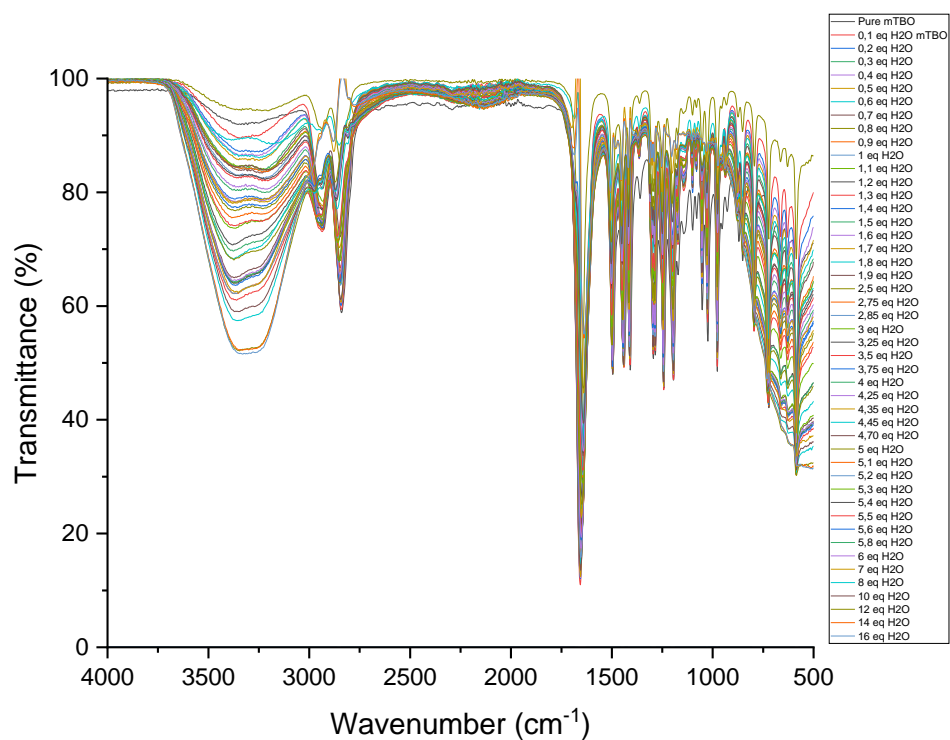

Figure S177 IR of water titration of mTBO.

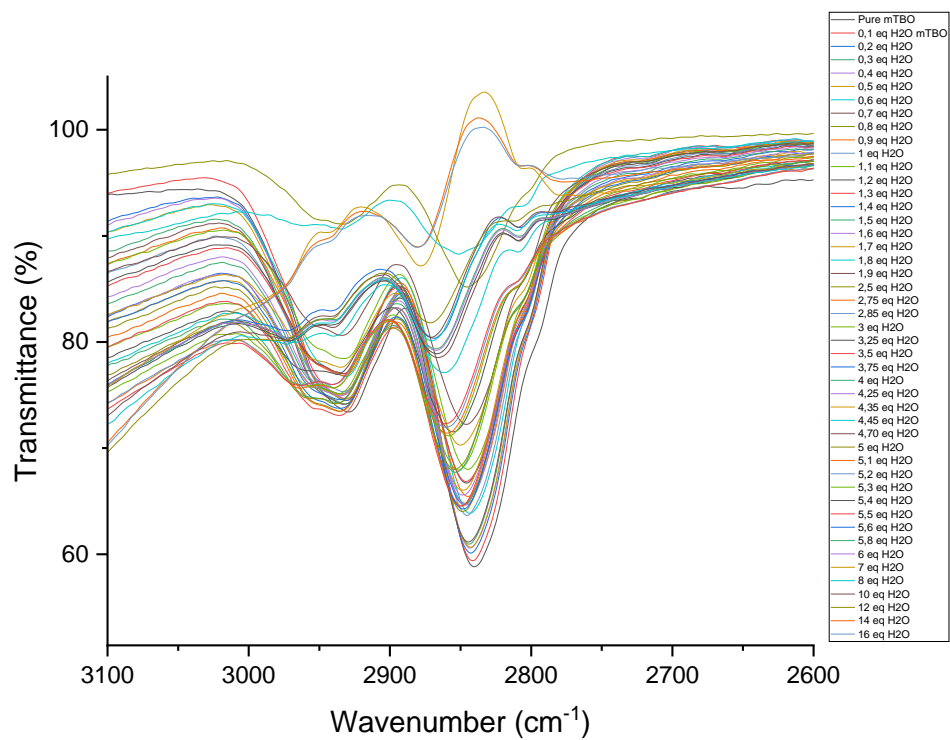

Figure S178 expansion of the mTBO  $\text{CH}_2$  region ( $2800 - 3000 \text{ cm}^{-1}$ )

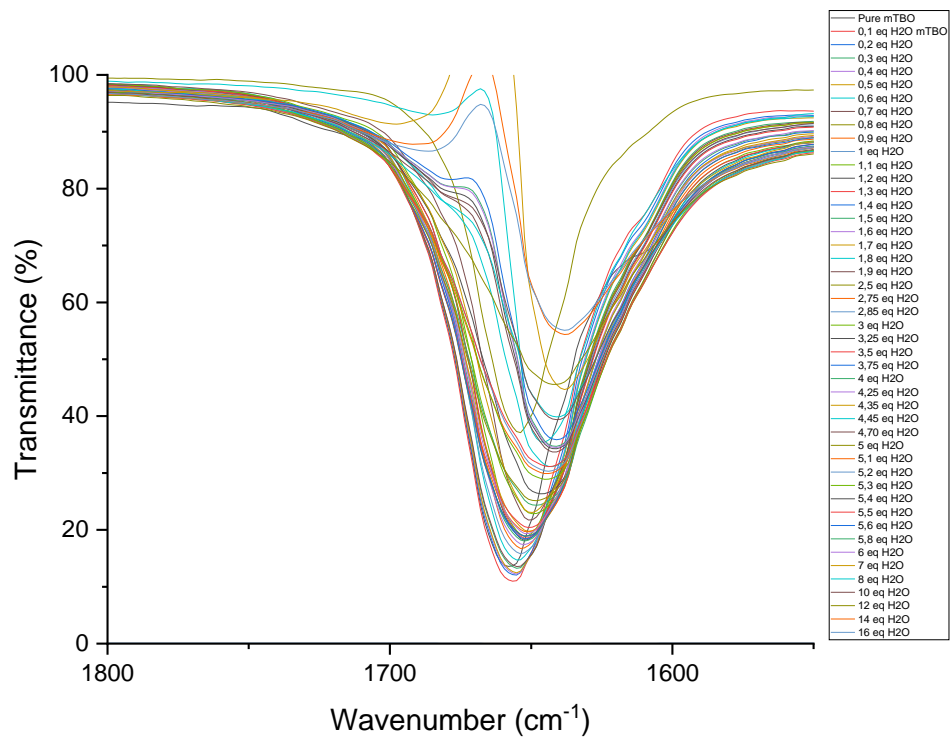

Figure S179 expansion of the dm3-mTBD imine region (1400 – 1600  $\text{cm}^{-1}$ )

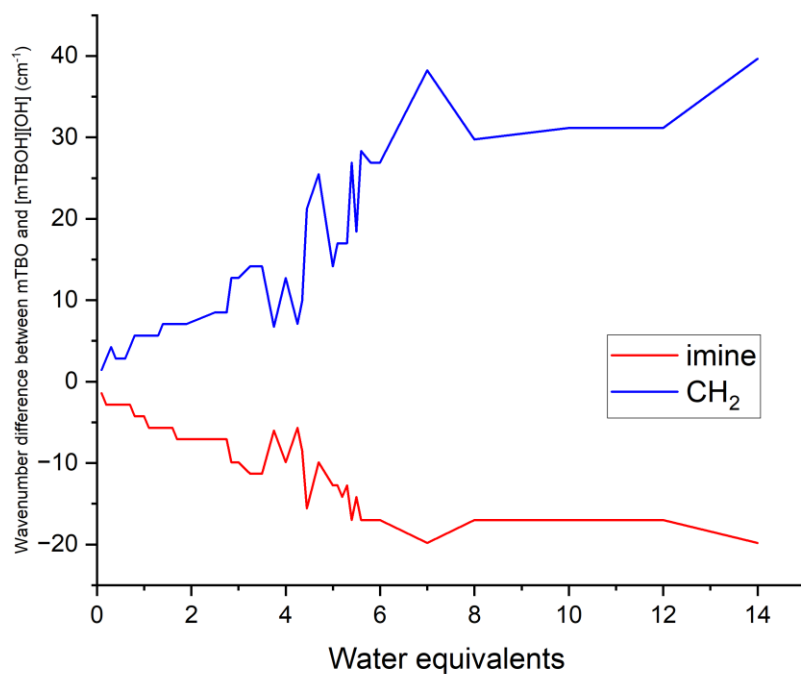

Figure S 180 IR shift of the imine and  $\text{CH}_2$  IR signal of mTBO in function of the water equivalents.



## VII. Prediction of reaction free energy barriers

The Gibbs free energy barriers ( $\Delta^\ddagger G$ ) of reaction steps involved in the hydrolysis of mTBD were estimated with quantum chemical methods.

Conformational isomers of reactants, transition states and products were initially searched with Spartan'20<sup>1</sup> using the Merck Molecular Force Field (MMFF) method<sup>2</sup>. Next, the geometry of each conformer was optimized at the BP86/def-TZVP-COSMO<sup>3-6</sup> level of theory, using TURBOMOLE v7.8<sup>7,8</sup>, with subsequent frequency calculations done to ensure that the structures correspond to appropriate stationary points. Intrinsic Reaction Coordinate (IRC) calculations served to characterize the minima (reactants and products) connected to each transition state.

The optimized conformer sets produced this way were used as input to COSMOconf v'24<sup>9</sup>, using a custom job workflow, which included the following steps: 1) Single-point calculation at the BP86/def2-TZVPD-COSMO level of theory<sup>3-6,10</sup> with a smooth-radii based isosurface cavity (FINE) parameterization; 2) Removal of duplicate conformers based on geometry similarity, using COSMOconf's CLUSTER\_GEOCHECK algorithm; 3) Single-point calculation at the BP86/def2-TZVPD level of theory, but without COSMO.

Once the BP86/def2-TZVPD//BP86/def2-TZVP COSMO screening surface charge densities and gas-phase energies were obtained for each conformer set, the multi-conformer free energy of each species in pure water was obtained with the CONductor like Screening Model for Real Solvents (COSMO-RS)<sup>11-13</sup> implemented in COSMOtherm v'24<sup>14</sup>. The reference state used was 1 bar of ideal gas and 1 mol/L for the liquid solvent, and all calculations were done at 298 K.

The modelled step-wise hydrolysis mechanism included the following reaction steps: Initial nucleophilic attack of water on the protonated mTBD, forming a protonated hemiaminal intermediate (hamH<sup>+</sup>), shown in Scheme 1; Initial nucleophilic attack of OH<sup>-</sup> on the protonated mTBD, forming a neutral hemiaminal intermediate, shown in Scheme 2; Nucleophilic attack of OH<sup>-</sup> on the neutral mTBD, forming an anionic intermediate, shown in Scheme 3; Nucleophilic attack of water on the protonated mTBD catalyzed by acetate, shown in Scheme 4; Hemiaminal zwitterion formation and subsequent deamination step, shown in Scheme 5; Concerted deamination catalyzed by acetate, shown in Scheme 6.

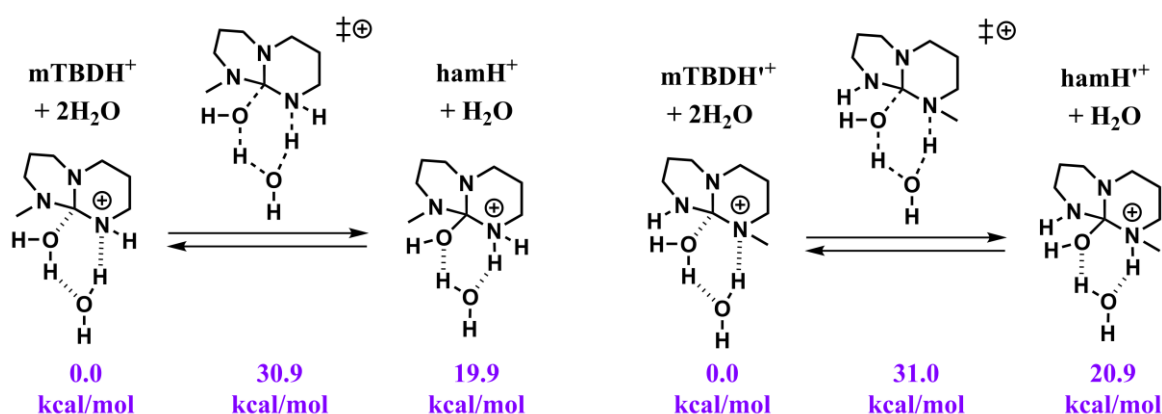

Scheme 1) Hemi-aminal formation step: Water attack on protonated mTBD.



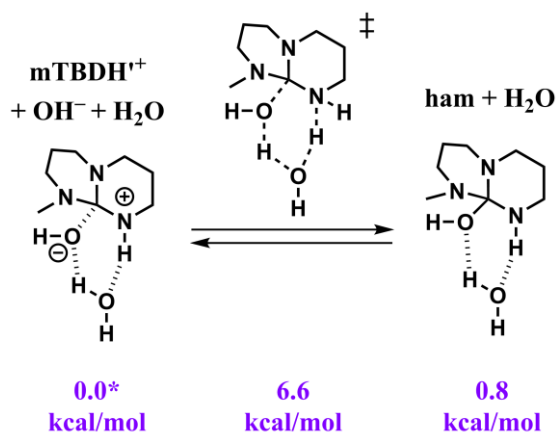

Scheme 2) Hemiaminal formation step:  $\text{OH}^-$  attack on protonated mTBD. \*: reactant-side free energy calculated for the IRC end-point, without full geometry optimization.

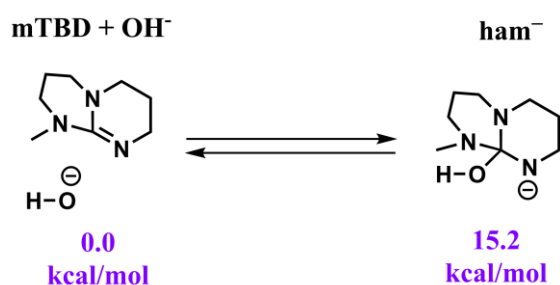

Scheme 3)  $\text{OH}^-$  attack on neutral mTBD. No transition state was found. Free energy of anionic product calculated relative to separate reactants ( $\text{mTBD} + \text{OH}^-$ ).

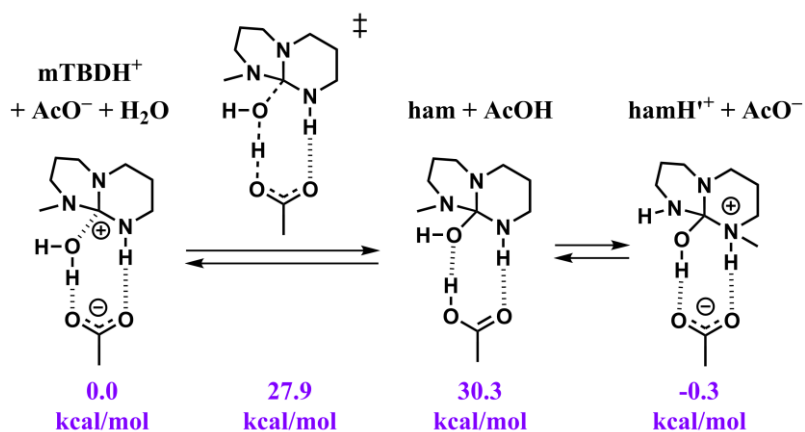

Scheme 4) Hemiaminal formation step: Water attack on protonated mTBD catalyzed by acetate.

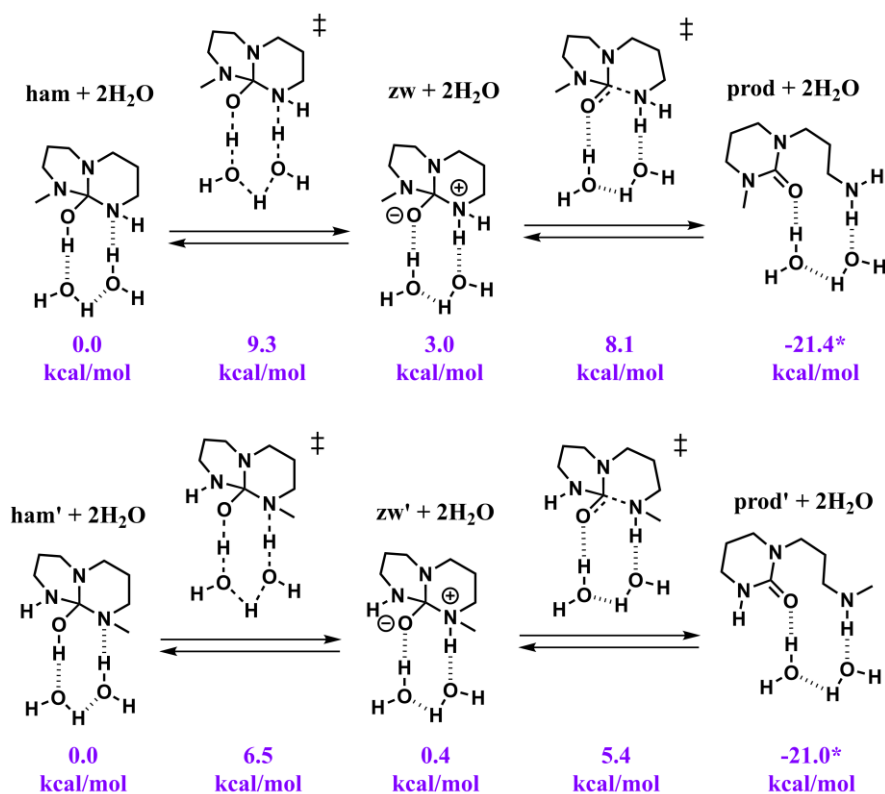

Scheme 5) Hemiaminal zwitterion formation step followed by deamination reaction step. \*: summed free energy of separate products (prod + 2H<sub>2</sub>O).

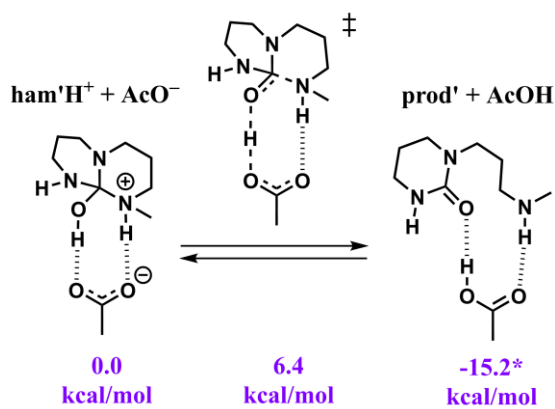

Scheme 6) Concerted deamination reaction step catalyzed by acetate. \*: summed free energy of separate products (prod' + AcOH).

## VIII. References:

- 1) E. Gazagnaire, J. Helminen, A. W. T. King, T. Golin Almeida, T. Kurten and I. Kilpeläinen, 2024, 12119–12124.
- 2) Spartan'16. *Wavefunct. Inc Irvine, CA* **2016**.  
<https://doi.org/https://downloads.wavefun.com/Spartan20Manual.pdf>.
- 3) Halgren, T. A. MMFF VII. Characterization of MMFF94, MMFF94s, and Other Widely Available Force Fields for Conformational Energies and for Intermolecular- Interaction Energies and Geometries. **2000**, *20* (7), 730–748. [https://doi.org/doi.org/10.1002/\(SICI\)1096-987X\(199905\)20:7<730::AID-JCC8>3.0.CO;2-T](https://doi.org/doi.org/10.1002/(SICI)1096-987X(199905)20:7<730::AID-JCC8>3.0.CO;2-T).
- 4) Becke, A. . Density-Fnctional Exchange-Energy Approximation with Correct Asymptotic Behavior. *J. Chem. Phys.* **1988**, *4* (4), 276–282. <https://doi.org/10.1063/1.1749835>.
- 5) Perdew, J. P. Density-Functional Approximation for the Correlation Energy of the Inhomogeneous Electron Gas. *Pay Perform. Heal. Care Methods Approaches* **1986**, *33* (June), 8822–8824.  
<https://doi.org/10.3768/rtipress.2011.bk.0002.1103.12>.
- 6) Weigend, F. Accurate Coulomb-Fitting Basis Sets for H to Rn. *Phys. Chem. Chem. Phys.* **2006**, *8* (9), 1057–1065. <https://doi.org/10.1039/b515623h>.
- 7) Klamt, A.; Schuurmann, G. *COSMO: A New Approach to Dielectric Screening in Solvents with Explicit Expressions for the Screening Energy and Its Gradient*; 1993.
- 8) GmbH, T. TURBOMOLE V7.7 2022. a Development of University of Karlsruhe and Forschungszentrum Karlsruhe GmbH,. TURBOMOLE GmbH, since 2007. <https://www.turbomole.org>.
- 9) Balasubramani, S. G.; Chen, G. P.; Coriani, S.; Diedenhofen, M.; Frank, M. S.; Franzke, Y. J.; Furche, F.; Grotjahn, R.; Harding, M. E.; Hättig, C.; Hellweg, A.; Helmich-Paris, B.; Holzer, C.; Huniar, U.; Kaupp, M.; Marefat Khah, A.; Karbalaeei Khani, S.; Müller, T.; Mack, F.; Nguyen, B. D.; Parker, S. M.; Perlt, E.; Rappoport, D.; Reiter, K.; Roy, S.; Rückert, M.; Schmitz, G.; Sierka, M.; Tapavicza, E.; Tew, D. P.; Van Wüllen, C.; Voora, V. K.; Weigend, F.; Wodyński, A.; Yu, J. M. TURBOMOLE: Modular Program Suite for Ab Initio Quantum-Chemical and Condensed-Matter Simulations. *J. Chem. Phys.* **2020**, *152* (18), 184107. <https://doi.org/10.1063/5.0004635>.
- 10) BIOVIA COSMOconf. *Dassault Systèmes* **2024**, <http://www.3ds.com>.
- 11) Rappoport, D.; Furche, F. Property-Optimized Gaussian Basis Sets for Molecular Response Calculations. *J. Chem. Phys.* **2010**, *133* (13), 134105. <https://doi.org/10.1063/1.3484283/920872>.
- 12) Klamt, A. Conductor-like Screening Model for Real Solvents: A New Approach to the Quantitative Calculation of Solvation Phenomena. *J. Phys. Chem.* **1995**, *99* (7), 2224–2235.  
<https://doi.org/10.1021/j100007a062>.
- 13) Klamt, A.; Jonas, V.; Bürger, T.; Lohrenz, J. C. W. Refinement and Parametrization of COSMO-RS. *J. Phys. Chem. A* **1998**, *102* (26), 5074–5085. <https://doi.org/10.1021/jp980017s>.
- 14) Eckert, F.; Klamt, A. Fast Solvent Screening via Quantum Chemistry: COSMO-RS Approach. *AIChE J.* **2002**, *48* (2), 369–385. <https://doi.org/10.1002/AIC.690480220>.
- 15) BIOVIA COSMOtherm. Release 2019; Dassault Systèmes: San Diego 2019. <http://www.3ds.com>.
